# Supplementary material for: The mRNA-bound proteome of the early fly embryo
Source: HighWire-hosted journal article supplement (doi:10.1101/gr.200386.115), 2016-04-28
Supplement: Supplemental_Data.xlsx [file Supplemental_Data.xlsx]

## Sheet: early Fly mRBPome n=476
id	Protein IDs	Protein names	Gene names	Fasta headers	Validation candidates	RBPome unique or overlap (>2 peptides, 10-fold enrichment)	early_fly_mRBPome_catgetory	early_fly_mRBPome__enrichment_H_M_L	Whole proteome (>1 peptide)	X490-RBP enrichment over whole proteome	YW-RBP enrichment over whole proteome	"RNA_binding" in GOMF	RNA binding domain (Pfam)	RBDs	No_of_RBDs_in_order	Known RBP - RNA binding domain (Pfam), RNA binding (GOMF)	Orthologue_to_human_RBPcensus	"RNA_related" in GOMF	Overlap with human (Costello etal., Baltz et al., Beckmann et al.,)	Overlap with Yeast ( Matia-González et al. et al., Beckmann et al., Mitchel et al.)	Overlap with Costello et al., Cell 2012 (HeLa)	Overlap with Baltz et al., MolCell 2012 (HEK293)	Overlap with Beckmann et al., Nat. Commu 2015 (HUH-7)	Overlap with Kwon et al., NSMB 2013 (Mouse ESC)	Overlap with Matia-González et al., NSMB 2015 (C.elegans)	Overlap with Matia-González et al., NSMB 2015 (Yeast)	Overlap with Beckmann et al., Nat. Commu 2015 (Yeast)	Overlap with Mitchel et al., NSMB 2012 (Yeast)	Isoelectric point (pI)	Ribosomal_Protein	TF_annotation_FlyTF	Razor + unique peptides 365nm CL_X490_oligodT pulldown	Razor + unique peptides no CL_X490_oligodT pulldown	Razor + unique peptides X490_whole proteme measurement	Razor + unique peptides 254nm CL_YW_oligodT pulldown	Razor + unique peptides no CL_YW_oligodT pulldown	Razor + unique peptides YW_whole proteme measurement	Log10 intensity no CL_X490_oligodT pulldown	Log10 intensity 365nm CL_X490_oligodT pulldown	Log10 intensity no CL_YW_oligodT pulldown	Log10 intensity 254nm CL_YW_oligodT pulldown	Log10 intensity X490_whole proteme measurement	Log10 intensity YW_whole proteme measurement	Log10 iBAQ no CL_X490_oligodT pulldown	Log10 iBAQ 365nm CL_X490_oligodT pulldown	Log10 iBAQ no CL_YW_oligodT pulldown	Log10 iBAQ 254nm CL_YW_oligodT pulldown	Log10 iBAQ X490_whole proteme measurement	Log10 iBAQ YW_whole proteme measurement
4	A1Z6E0-5;A1Z6E0-3;A1Z6E0-2;A1Z6E0-4;A1Z6E0	Protein gustavus	gus	>sp|A1Z6E0-5|GUS_DROME Isoform F of Protein gustavus OS=Drosophila melanogaster GN=gus;>sp|A1Z6E0-3|GUS_DROME Isoform B of Protein gustavus OS=Drosophila melanogaster GN=gus;>sp|A1Z6E0-2|GUS_DROME Isoform A of Protein gustavus OS=Drosophila melanogaster GN	0	Both	Rel_Homo_92	medium	365nm (X490) unique	5.3818	YW whole not available	0	0	NA	NA	0	0	1	0	0	0	0	0	0	0	0	0	0	9.56	0	NA	2	0	6	5	0	0		8.2974		8.88293	8.45254			6.4966		7.11661	7.3386
13	A1Z6L9		Trap1	>tr|A1Z6L9|A1Z6L9_DROME FI21274p1 OS=Drosophila melanogaster GN=Trap1 PE=2 SV=1	0	Both	Rel_Homo_92	low	Both	0.888099	0.170844	0	0	NA	NA	0	0	1	1	1	1	0	0	0	0	1	0	0	7.24	0	NA	7	1	29	4	0	21	6.23737	8.82853		8.79985	9.72216	9.20347	4.6463	6.50664		6.56253	8.13111	7.6124
28	A1Z743;A1Z745;Q8SXN9		CG1383	>tr|A1Z743|A1Z743_DROME CG30497, isoform A OS=Drosophila melanogaster GN=CG30497 PE=4 SV=1;>tr|A1Z745|A1Z745_DROME CG30497, isoform C OS=Drosophila melanogaster GN=CG30497 PE=4 SV=1;>tr|Q8SXN9|Q8SXN9_DROME CG30497, isoform B OS=Drosophila melanogaster GN=C	Validated	Both	known285	NA	365nm (X490) unique	X490 whole not available	YW whole not available	0	1	DUF1693	manual	1	1	0	1	0	1	0	0	0	0	0	0	0	8.94	0	NA	3	0	1	15	0	0		8.37955		10.2627				6.19451		8.01766
31	A1Z784;A8DY67;Q7JV23		ACC	>tr|A1Z784|A1Z784_DROME CG11198, isoform A OS=Drosophila melanogaster GN=ACC PE=4 SV=1;>tr|A8DY67|A8DY67_DROME CG11198, isoform D OS=Drosophila melanogaster GN=ACC PE=4 SV=1;>tr|Q7JV23|Q7JV23_DROME CG11198, isoform B OS=Drosophila melanogaster GN=ACC PE=2	0	Both	new99	medium	Both	1.94442	10.779	0	0	NA	NA	0	0	0	0	0	0	0	0	0	0	0	0	0	5.86	0	NA	13	4	47	11	7	4	7.11237	8.96883	7.37703	9.25985	9.51053	7.82971	5.00518	6.11919	5.26982	6.47261	7.40333	5.7225
54	A1Z830;A1Z831			>tr|A1Z830|A1Z830_DROME CG12128, isoform A OS=Drosophila melanogaster GN=CG12128 PE=4 SV=1;>tr|A1Z831|A1Z831_DROME CG12128, isoform B OS=Drosophila melanogaster GN=CG12128 PE=4 SV=1	0	Both	known285	high	Both	18.0053	596.195	0	1	Methyltrn_RNA_3	1	1	1	0	1	0	1	1	1	1	0	0	0	0	6.82	0	NA	3	0	2	11	0	1		7.98884		9.57021	7.64506	6.37446		5.88036		7.42022	6.19789	4.9273
69	A1Z8P9	Nucleoprotein TPR	Mtor	>sp|A1Z8P9|TPR_DROME Nucleoprotein TPR OS=Drosophila melanogaster GN=Mtor PE=1 SV=1	0	Both	Rel_Homo_92	low	Both	0.836808	0.0602663	0	0	NA	NA	0	1	1	1	1	1	0	0	0	0	1	0	1	5.03	0	NA	7	3	54	8	1	57	7.04739	8.81647	6.25037	8.6907	9.73699	9.55485	4.98292	6.02222	4.18591	5.988	7.67252	7.49039
75	A1Z8U0		Prp8	>tr|A1Z8U0|A1Z8U0_DROME Pre-mRNA processing factor 8 OS=Drosophila melanogaster GN=Prp8 PE=4 SV=1	0	Both	known285	high	Both	1.32	68.4614	0	1	PRO8NT;PROCN;PROCT;PRP8_domainIV;RRM_4;U5_2.snRNA_bdg;U6.snRNA_bdg	1;1;1;1;1;1;1	1	1	1	1	1	1	1	0	0	1	1	1	1	8.98	0	NA	11	6	68	46	57	3	7.15725	8.93383	9.05983	10.1104	9.64666	7.81495	5.06382	6.10089	6.96641	7.2745	7.55324	5.72153
86	A1Z992		AGBE	>tr|A1Z992|A1Z992_DROME CG33138 OS=Drosophila melanogaster GN=AGBE PE=4 SV=1	0	Both	new99	low	Both	0.266401	0.0522929	0	0	NA	NA	0	0	0	0	0	0	0	0	0	0	0	0	0	5.8	0	NA	2	2	31	2	0	16	7.22704	8.39104		7.74639	9.84382	8.74155	5.61425	6.08365		5.56473	8.23104	7.12875
88	A1Z9A8	Protein PTCD3 homolog, mitochondrial	CG4679	>sp|A1Z9A8|PTCD3_DROME Protein PTCD3 homolog, mitochondrial OS=Drosophila melanogaster GN=CG4679 PE=2 SV=1	0	Both	known285	high	Both	8.13288	93.4344	1	0	NA	NA	1	1	1	1	0	1	1	1	1	0	0	0	0	5.53	0	NA	13	2	19	33	1	10	7.32286	9.47919	6.50312	11.2204	9.35717	8.70839	5.77878	7.15042	4.95906	8.85236	7.8131	7.16432
91	A1Z9E3	Elongation factor Tu	EfTuM	>tr|A1Z9E3|A1Z9E3_DROME Elongation factor Tu OS=Drosophila melanogaster GN=EfTuM PE=3 SV=1	0	Both	known285	low	Both	0.710732	0.516853	1	1	GTP_EFTU;GTP_EFTU_D2;GTP_EFTU_D3	1;1;1	1	1	1	1	1	1	0	1	0	0	1	0	0	8.24	0	NA	6	3	25	12	0	20	7.8366	9.24866		9.48518	10.2043	9.35771	6.38943	7.03591		7.34143	8.75713	7.91054
99	A1Z9K0			>tr|A1Z9K0|A1Z9K0_DROME CG6701 OS=Drosophila melanogaster GN=CG6701 PE=4 SV=1	0	Both	Rel_Homo_92	high	Both	16.6476	226.243	0	0	NA	NA	0	0	0	1	1	1	1	1	1	0	1	1	1	9.13	0	yes	9	3	14	56	32	4	7.13786	9.25079	8.79478	10.8685	8.83658	7.9982	5.26281	6.60995	6.91972	8.19524	6.96152	6.12313
110	A1Z9X0;Q0E974;Q0E971;Q0E973;Q0E972		aPKC	>tr|A1Z9X0|A1Z9X0_DROME Atypical protein kinase C, isoform A OS=Drosophila melanogaster GN=aPKC PE=1 SV=1;>tr|Q0E974|Q0E974_DROME Atypical protein kinase C, isoform D OS=Drosophila melanogaster GN=aPKC PE=1 SV=1;>tr|Q0E971|Q0E971_DROME Atypical protein kin	0	Both	new99	medium	Both	0.915119	11.8101	0	0	NA	NA	0	0	0	0	1	0	0	0	0	0	1	1	0	5.68	0	NA	2	0	9	3	0	4		7.76792		8.87112	8.73635	7.42985		5.74469		6.83943	7.35614	6.04964
118	A1ZAB5	Protein clueless	clu	>sp|A1ZAB5|CLU_DROME Protein clueless OS=Drosophila melanogaster GN=clu PE=1 SV=1	0	Both	known285	high	Both	1.0938	25.7317	0	1	eIF3_p135	1	1	0	0	0	1	0	0	0	0	1	1	1	1	6.14	0	NA	6	4	35	26	14	12	7.28128	9.01401	8.09054	10.2127	9.8018	8.33472	5.41797	6.40449	6.22722	7.59939	7.93848	6.47139
124	A1ZAK7;A1ZAK8		Psi	>tr|A1ZAK7|A1ZAK7_DROME LD35640p OS=Drosophila melanogaster GN=Psi PE=2 SV=1;>tr|A1ZAK8|A1ZAK8_DROME P-element somatic inhibitor, isoform C OS=Drosophila melanogaster GN=Psi PE=4 SV=1	0	Both	known285	high	Both	84.3277	447.798	1	1	KH_1;DUF1897	4;2	1	1	1	1	0	1	1	1	1	0	0	0	0	8.28	0	NA	15	5	15	32	8	12	7.62786	10.303	8.49668	12.2464	9.09705	8.97841	6.1807	8.00294	7.04953	9.89986	7.6499	7.53125
127	A1ZAP7			>tr|A1ZAP7|A1ZAP7_DROME CG6967, isoform C OS=Drosophila melanogaster GN=CG6967 PE=4 SV=2	0	Both	Rel_Homo_92	NA		X490 whole not available	YW whole not available	0	0	NA	NA	0	0	0	1	1	1	1	1	1	0	1	1	1	8.95	0	NA	12	0	0	35	8	0		9.34598	7.68158	10.8706				6.94908	6.05831	8.44902
134	A1ZAW0		Dcr-2	>tr|A1ZAW0|A1ZAW0_DROME Dicer-2 OS=Drosophila melanogaster GN=Dcr-2 PE=1 SV=1	0	Both	known285	medium	365nm (X490) unique	1.59168	YW whole not available	1	1	Ribonuclease_3;dsrm;PAZ;ResIII	2;1;1;1	1	0	1	0	0	0	0	0	0	0	0	0	0	6.41	0	no	3	1	17	8	3	0	6.34141	8.14459	6.79594	8.73114	8.84145		4.3328	5.46178	4.78734	6.08135	6.83285
138	A1ZAX1	Eukaryotic translation initiation factor 3 subunit C	eIF3-S8	>sp|A1ZAX1|EIF3C_DROME Eukaryotic translation initiation factor 3 subunit C OS=Drosophila melanogaster GN=eIF3-S8 PE=1 SV=1	0	Both	known285	high	Both	13.7297	23.9253	1	1	eIF.3c_N	1	1	1	1	1	1	1	1	0	1	1	1	1	1	5.73	0	NA	36	12	41	55	13	36	8.28199	10.7106	8.22139	11.9759	10.2593	10	6.63853	8.18053	6.57795	9.45297	8.61579	8.35658
154	A8E6M1;A1ZBB4;E1JGL8;Q8MRW8			>tr|A8E6M1|A8E6M1_DROME CG30122, isoform D OS=Drosophila melanogaster GN=CG30122 PE=2 SV=1;>tr|A1ZBB4|A1ZBB4_DROME CG30122, isoform B OS=Drosophila melanogaster GN=CG30122 PE=4 SV=1;>tr|E1JGL8|E1JGL8_DROME CG30122, isoform C OS=Drosophila melanogaster GN=C	0	Both	known285	high	Both	59.3959	20.6013	0	1	SAP	1	1	1	1	1	0	1	1	1	0	0	0	0	0	4.91	0	NA	28	6	29	43	13	27	7.7158	10.772	8.45853	11.6931	9.67946	9.80292	6.03455	8.19904	6.77728	9.15311	7.99821	8.12169
159	A1ZBJ2			>tr|A1ZBJ2|A1ZBJ2_DROME CG7461 OS=Drosophila melanogaster GN=CG7461 PE=3 SV=2	0	Both	new99	low	Both	0.0971088	0.15105	0	0	NA	NA	0	0	0	0	0	0	0	0	0	0	0	0	0	7.63	0	NA	2	1	30	9	0	24	6.56705	8.17775		9.2438	10.0865	9.6683	5.03559	5.96932		7.03346	8.55499	8.13682
169	A1ZBW1;A1ZBW0;A1ZBW3		bl	>tr|A1ZBW1|A1ZBW1_DROME Bancal, isoform A OS=Drosophila melanogaster GN=bl PE=2 SV=1;>tr|A1ZBW0|A1ZBW0_DROME Bancal, isoform C OS=Drosophila melanogaster GN=bl PE=2 SV=1;>tr|A1ZBW3|A1ZBW3_DROME Bancal, isoform B OS=Drosophila melanogaster GN=bl PE=4 SV=1	0	Both	known285	high	Both	39.8446	33.6355	1	1	KH_3;KH_1	2;1	1	1	1	1	1	1	1	1	1	0	1	1	1	8.77	0	NA	12	7	14	18	11	14	8.64196	10.4988	9.83571	11.8855	9.60229	9.76834	7.3632	8.35098	8.55695	9.73392	8.32354	8.48959
177	Q9XTL9;A4UZZ4	Glycogen phosphorylase;Phosphorylase	GlyP	>sp|Q9XTL9|PYG_DROME Glycogen phosphorylase OS=Drosophila melanogaster GN=GlyP PE=2 SV=2;>tr|A4UZZ4|A4UZZ4_DROME Phosphorylase OS=Drosophila melanogaster GN=GlyP PE=3 SV=1	not_confirmed	Both	new99	low	Both	0.221438	0.0814777	0	0	NA	NA	0	0	0	0	1	0	0	0	0	0	1	0	0	6.09	0	NA	13	8	57	25	4	48	7.59151	9.26691	7.75127	9.77725	10.7275	10.4307	5.88394	6.79223	6.04372	7.35166	9.01991	8.72309
191	P08181;A4V2B8	Casein kinase II subunit alpha	CkIIalpha	>sp|P08181|CSK2A_DROME Casein kinase II subunit alpha OS=Drosophila melanogaster GN=CkIIalpha PE=1 SV=2;>tr|A4V2B8|A4V2B8_DROME Casein kinase IIalpha, isoform C OS=Drosophila melanogaster GN=CkIIalpha PE=4 SV=1	0	Both	Rel_Homo_92	low	Both	0.155006	0.0211313	0	0	NA	NA	0	0	1	0	0	0	0	0	0	1	0	0	0	6.72	0	NA	3	0	16	5	0	17		8.41189		8.75426	10.0981	10.0689		6.46028		6.85608	8.84286	8.81362
198	P48605;A4V303	T-complex protein 1 subunit gamma	Cctgamma	>sp|P48605|TCPG_DROME T-complex protein 1 subunit gamma OS=Drosophila melanogaster GN=Cctgamma PE=2 SV=2;>tr|A4V303|A4V303_DROME Cctgamma, isoform B OS=Drosophila melanogaster GN=Cctgamma PE=3 SV=1	0	Both	Rel_Homo_92	low	Both	0.189792	0.308418	0	0	NA	NA	0	0	1	1	1	0	1	0	0	0	1	0	0	6.37	0	NA	10	5	44	23	10	39	7.84346	9.18975	7.73614	10.2858	10.7237	10.3238	6.31199	6.89756	6.20466	7.99895	9.1922	8.79228
201	P12613;A4V391	T-complex protein 1 subunit alpha	T-cp1	>sp|P12613|TCPA_DROME T-complex protein 1 subunit alpha OS=Drosophila melanogaster GN=T-cp1 PE=2 SV=2;>tr|A4V391|A4V391_DROME T-complex protein 1 subunit alpha OS=Drosophila melanogaster GN=T-cp1 PE=3 SV=1	0	Both	Rel_Homo_92	low	Both	0.244803	0.271551	0	0	NA	NA	0	0	0	1	1	0	1	0	0	1	1	1	0	6.03	0	NA	9	4	28	20	9	27	7.76187	9.26984	7.94681	10.3349	10.6866	10.4246	6.25672	6.99733	6.44165	8.07081	9.18144	8.91943
202	Q7KRY6;A4V3G8	Nucleosomal histone kinase 1	ball	>sp|Q7KRY6|NHK1_DROME Nucleosomal histone kinase 1 OS=Drosophila melanogaster GN=ball PE=1 SV=1;>tr|A4V3G8|A4V3G8_DROME Ballchen, isoform B OS=Drosophila melanogaster GN=ball PE=4 SV=1	0	Both	new99	low	Both	0.626253	0.879084	0	0	NA	NA	0	0	0	0	1	0	0	0	0	0	1	1	0	9.86	0	NA	2	0	7	3	0	2		7.77406		8.5141	8.90673	8.2273		5.61203		6.37033	7.38821	6.70877
213	Q960Z0;A4V4A1	Kinesin-like protein Klp10A	Klp10A	>sp|Q960Z0|KI10A_DROME Kinesin-like protein Klp10A OS=Drosophila melanogaster GN=Klp10A PE=1 SV=1;>tr|A4V4A1|A4V4A1_DROME Klp10A, isoform B OS=Drosophila melanogaster GN=Klp10A PE=3 SV=1	0	Both	new99	medium	Both	1.89448	2.68838	0	0	NA	NA	0	0	0	0	1	0	0	0	0	0	0	1	0	6.78	0	NA	6	2	22	13	1	15	7.34161	9.02063	6.75553	9.97101	9.56935	9.09174	5.78532	6.71761	5.19923	7.68245	8.01305	7.53543
218	P27619;A4V4I8;E1JJA4;M9PHQ0;P27619-2;A4V4J0;M9PJN9;E1JJA5	Dynamin	shi	>sp|P27619|DYN_DROME Dynamin OS=Drosophila melanogaster GN=shi PE=1 SV=2;>tr|A4V4I8|A4V4I8_DROME Shibire, isoform F OS=Drosophila melanogaster GN=shi PE=3 SV=1;>tr|E1JJA4|E1JJA4_DROME Shibire, isoform L OS=Drosophila melanogaster GN=shi PE=3 SV=1;>tr|M9PHQ	0	Both	Rel_Homo_92	low	Both	0.702331	0.27032	0	0	NA	NA	0	0	1	1	1	0	1	0	0	1	1	1	0	8.53	0	NA	8	3	38	3	0	11	7.50454	8.85903		8.2425	9.85206	8.48777	5.78027	6.4014		5.9129	8.12778	6.7635
223	Q8MRC7;Q9W5S7;Q9U4F5;A4V4V2;Q9TW27;Q9TW12		DIP1	>tr|Q8MRC7|Q8MRC7_DROME DISCO interacting protein 1, isoform E OS=Drosophila melanogaster GN=DIP1 PE=2 SV=1;>tr|Q9W5S7|Q9W5S7_DROME DISCO interacting protein 1, isoform F OS=Drosophila melanogaster GN=DIP1 PE=4 SV=3;>tr|Q9U4F5|Q9U4F5_DROME DISCO interactin	0	Both	known285	high	254nm (YW) unique	X490 whole not available	33.4029	1	1	dsrm	1	1	0	1	0	0	0	0	0	0	0	0	0	0	6.04	0	NA	3	0	0	9	0	3		8.47453		10.2757		8.27974		6.92791		8.67596		7.43465
224	A5XCL5;Q9VSW2;E1JI91;Q9VSW1		UGP	>tr|A5XCL5|A5XCL5_DROME LD36265p (Fragment) OS=Drosophila melanogaster GN=UGP PE=2 SV=1;>tr|Q9VSW2|Q9VSW2_DROME RE14081p OS=Drosophila melanogaster GN=UGP PE=2 SV=2;>tr|E1JI91|E1JI91_DROME FI18837p1 OS=Drosophila melanogaster GN=UGP PE=2 SV=1;>tr|Q9VSW1|Q9	0	Both	new99	low	Both	0.0229513	0.133398	0	0	NA	NA	0	0	0	0	1	0	0	0	0	0	1	1	0	6.94	0	NA	2	0	28	3	0	16		7.36682		8.5341	9.96912	9.06468		5.27987		6.43025	8.49199	7.58758
230	A8DY81;E2QCN4;A8DY80;A8DY82		Not1	>tr|A8DY81|A8DY81_DROME Not1, isoform C OS=Drosophila melanogaster GN=Not1 PE=1 SV=1;>tr|E2QCN4|E2QCN4_DROME Not1, isoform F OS=Drosophila melanogaster GN=Not1 PE=4 SV=1;>tr|A8DY80|A8DY80_DROME Not1, isoform D OS=Drosophila melanogaster GN=Not1 PE=4 SV=1;>	0	Both	known285	high	Both	3.54933	17.8873	0	1	Not1	1	1	1	1	1	1	1	1	1	1	0	1	0	0	6.3	0	yes	19	11	53	45	39	21	7.84778	9.51413	8.81766	10.3738	9.74933	8.64185	5.77223	6.651	6.74211	7.53638	7.67378	6.56631
248	O61380;A8DZ29		eIF4G	>tr|O61380|O61380_DROME Eukaryotic translation initiation factor 4G, isoform A OS=Drosophila melanogaster GN=eIF4G PE=2 SV=3;>tr|A8DZ29|A8DZ29_DROME Eukaryotic translation initiation factor 4G, isoform B OS=Drosophila melanogaster GN=eIF4G PE=4 SV=1	0	Both	known285	medium	Both	4.66259	2.72156	1	1	MA3;MIF4G	1;1	1	1	1	1	1	1	1	1	1	0	1	1	1	7.8	0	NA	30	16	59	67	45	60	8.29957	10.258	9.1962	11.2681	10.3131	10.2882	6.39108	7.50035	7.28771	8.5321	8.40465	8.37976
264	Q9VVC5;Q8IQQ0;A8JNU6		Nc73EF	>tr|Q9VVC5|Q9VVC5_DROME Neural conserved at 73EF, isoform A OS=Drosophila melanogaster GN=Nc73EF PE=2 SV=2;>tr|Q8IQQ0|Q8IQQ0_DROME Neural conserved at 73EF, isoform F OS=Drosophila melanogaster GN=Nc73EF PE=2 SV=1;>tr|A8JNU6|A8JNU6_DROME Neural conserved a	0	Both	new99	low	Both	0.176337	1.68909	0	0	NA	NA	0	0	0	0	1	0	0	0	0	1	1	0	0	6.41	0	NA	4	2	38	5	0	4	7.03547	8.28175		8.7694	9.92277	8.18018	5.31946	5.88019		6.40936	8.20677	6.46418
277	A8JRA4;Q8IMU5;Q9VBZ5		CG6422-RB	>tr|A8JRA4|A8JRA4_DROME CG6422, isoform C OS=Drosophila melanogaster GN=CG6422 PE=4 SV=1;>tr|Q8IMU5|Q8IMU5_DROME CG6422, isoform B OS=Drosophila melanogaster GN=CG6422-RB PE=2 SV=1;>tr|Q9VBZ5|Q9VBZ5_DROME CG6422, isoform A OS=Drosophila melanogaster GN=CG6	Validated	Both	known285	high	Both	28.7412	150.037	0	1	YTH	1	1	1	0	1	0	1	1	1	1	0	0	0	0	9.06	0	NA	3	1	6	19	0	2	6.86413	8.54082		10.3378	7.94823	7.6849	5.32006	6.28974		8.03455	6.40417	6.14082
287	Q9W4D2;A8JUY0;Q9W4D2-2;A8JUY2	RNA-binding protein 4F	Rnp4F	>sp|Q9W4D2|RNP4F_DROME RNA-binding protein 4F OS=Drosophila melanogaster GN=Rnp4F PE=1 SV=1;>tr|A8JUY0|A8JUY0_DROME RNA-binding protein 4F, isoform D OS=Drosophila melanogaster GN=Rnp4F PE=4 SV=1;>sp|Q9W4D2-2|RNP4F_DROME Isoform B of RNA-binding protein 4F	0	Both	known285	medium	Both	2.45998	3.45419	1	1	Lsm_interact;RRM_1	1;1	1	1	1	1	1	1	1	1	1	0	1	1	1	5.02	0	NA	3	0	13	11	0	8		8.20085		9.53394	8.70397	8.57791		5.91992		7.23172	7.10192	6.97585
315	B7YZK4;B7YZK5;B7YZK6		Jabba	>tr|B7YZK4|B7YZK4_DROME CG42351, isoform E OS=Drosophila melanogaster GN=Jabba PE=4 SV=1;>tr|B7YZK5|B7YZK5_DROME CG42351, isoform C OS=Drosophila melanogaster GN=Jabba PE=4 SV=1;>tr|B7YZK6|B7YZK6_DROME CG42351, isoform D OS=Drosophila melanogaster GN=Jabba	Validated	Both	new99	low	Both	0.0888813	0.0166541	0	0	NA	NA	0	0	0	0	0	0	0	0	0	0	0	0	0	5.82	0	NA	3	1	22	7	1	20	6.1506	8.70375	7.42648	9.58074	10.6074	10.9381	4.8284	6.66104	6.10428	7.55493	9.28515	9.61588
328	P27864;B7YZZ9	Recombination repair protein 1	Rrp1	>sp|P27864|RRP1_DROME Recombination repair protein 1 OS=Drosophila melanogaster GN=Rrp1 PE=1 SV=2;>tr|B7YZZ9|B7YZZ9_DROME Recombination repair protein 1, isoform B OS=Drosophila melanogaster GN=Rrp1 PE=4 SV=1	0	Both	known285	high	Both	2.32948	36.0798	0	1	Exo_endo_phos	1	1	1	1	1	0	0	1	1	0	0	0	0	0	9.06	0	NA	2	0	15	4	0	1		8.53495		9.05641	9.03411	7.11654		6.29695		6.85985	7.50262	5.58505
339	Q9VNX8;B7Z098;M9MS45	Eukaryotic translation initiation factor 2A	CG7414	>sp|Q9VNX8|EIF2A_DROME Eukaryotic translation initiation factor 2A OS=Drosophila melanogaster GN=CG7414 PE=1 SV=1;>tr|B7Z098|B7Z098_DROME CG7414, isoform D OS=Drosophila melanogaster GN=CG7414 PE=4 SV=2;>tr|M9MS45|M9MS45_DROME CG7414, isoform C OS=Drosophi	0	Both	known285	medium	Both	1.94988	6.29405	1	1	eIF2A	1	1	1	1	0	1	0	0	0	0	0	1	1	1	9.2	0	NA	4	0	15	17	0	8		8.75013		10.0696	9.30874	8.81367		6.5487		7.853	7.83161	7.33654
343	Q7KUB0;Q8IQA7;Q9VSI6;Q7KUB1;B7Z0E0	Isocitrate dehydrogenase [NADP]	Idh	>tr|Q7KUB0|Q7KUB0_DROME Isocitrate dehydrogenase [NADP] OS=Drosophila melanogaster GN=Idh PE=3 SV=1;>tr|Q8IQA7|Q8IQA7_DROME Isocitrate dehydrogenase [NADP] OS=Drosophila melanogaster GN=Idh PE=2 SV=1;>tr|Q9VSI6|Q9VSI6_DROME Isocitrate dehydrogenase [NADP]	0	Both	new99	low	Both	0.0701806	0.032973	0	0	NA	NA	0	0	0	1	1	0	0	1	0	0	1	0	0	6.28	0	NA	5	2	29	8	2	27	7.54584	8.55796	7.02877	9.27557	10.5762	10.3587	6.13088	6.43457	5.6138	7.17941	9.16128	8.94372
344	B7Z0E2;M9ND61;Q9VSK3		Unr	>tr|B7Z0E2|B7Z0E2_DROME FI18812p1 OS=Drosophila melanogaster GN=Unr PE=2 SV=1;>tr|M9ND61|M9ND61_DROME Upstream of N-ras, isoform C OS=Drosophila melanogaster GN=Unr PE=4 SV=1;>tr|Q9VSK3|Q9VSK3_DROME Upstream of N-ras, isoform A OS=Drosophila melanogaster G	0	Both	known285	high	Both	23.0137	1448.51	1	1	CSD	5	1	1	1	1	0	1	1	1	1	0	0	0	0	6.1	0	no	12	3	23	55	4	6	7.12937	9.82473	7.62423	11.862	9.2224	8.1124	5.43917	7.32127	5.93403	9.30066	7.53221	6.42221
360	B7Z0X1;Q9W457	Serine hydroxymethyltransferase		>tr|B7Z0X1|B7Z0X1_DROME Serine hydroxymethyltransferase OS=Drosophila melanogaster GN=CG3011 PE=3 SV=1;>tr|Q9W457|Q9W457_DROME Serine hydroxymethyltransferase OS=Drosophila melanogaster GN=CG3011 PE=2 SV=1	0	Both	new99	low	Both	0.0245404	0.00768091	0	0	NA	NA	0	0	0	0	1	0	0	0	0	1	1	0	0	7.59	0	NA	2	0	30	2	0	25		7.67809		8.01231	10.2256	9.82095		5.59535		5.97674	8.7784	8.37379
379	Q02748;C9QP42	Eukaryotic initiation factor 4A	eIF-4a;eIF-4a-RB	>sp|Q02748|IF4A_DROME Eukaryotic initiation factor 4A OS=Drosophila melanogaster GN=eIF-4a PE=1 SV=3;>tr|C9QP42|C9QP42_DROME Eukaryotic initiation factor 4a, isoform E OS=Drosophila melanogaster GN=eIF-4a PE=2 SV=1	0	Both	known285	medium	Both	1.59792	0.976548	1	1	DEAD	1	1	1	1	1	1	1	1	1	1	0	0	1	0	5.43	0	NA	22	14	34	31	15	31	8.79999	10.5307	8.85114	11.4023	11.0283	10.8577	7.43826	8.29721	7.48941	9.2032	9.66658	9.49597
479	P25159-2;E1JGK6;P25159	Maternal effect protein staufen	stau	>sp|P25159-2|STAU_DROME Isoform B of Maternal effect protein staufen OS=Drosophila melanogaster GN=stau;>tr|E1JGK6|E1JGK6_DROME Staufen, isoform C OS=Drosophila melanogaster GN=stau PE=4 SV=1;>sp|P25159|STAU_DROME Maternal effect protein staufen OS=Drosoph	0	Both	known285	high	Both	86.5015	15.1621	1	1	dsrm	4	1	1	1	1	0	1	1	1	0	0	0	0	0	9.14	0	NA	6	0	3	9	2	4		8.89882	7.1262	9.71164	7.79806	8.10013		6.65702	5.62105	7.49328	6.29292	6.59499
484	P28750;E1JGN9	Maternal protein exuperantia	exu	>sp|P28750|EXU_DROME Maternal protein exuperantia OS=Drosophila melanogaster GN=exu PE=1 SV=2;>tr|E1JGN9|E1JGN9_DROME AT02443p OS=Drosophila melanogaster GN=exu PE=2 SV=1	0	Both	known285	NA		X490 whole not available	YW whole not available	1	0	NA	NA	1	0	1	0	0	0	0	0	0	0	0	0	0	9.55	0	NA	3	1	0	9	2	0	6.98973	8.2062	6.97755	9.40177			5.6473	6.18446	5.63512	7.3689
488	O44081;E1JGV6;O44081-2	H/ACA ribonucleoprotein complex subunit 4	Nop60B	>sp|O44081|DKC1_DROME H/ACA ribonucleoprotein complex subunit 4 OS=Drosophila melanogaster GN=Nop60B PE=1 SV=1;>tr|E1JGV6|E1JGV6_DROME Nucleolar protein at 60B, isoform C OS=Drosophila melanogaster GN=Nop60B PE=4 SV=1;>sp|O44081-2|DKC1_DROME Isoform C of H	0	Both	known285	medium	Both	0.673725	6.28993	1	1	DKCLD;PUA;TruB_N	1;1;1	1	1	1	1	1	1	0	0	1	1	1	1	1	9.33	0	NA	2	0	14	13	0	10		8.11518		10.0632	9.18786	8.80797		5.981		7.86174	7.72545	7.34557
491	Q9XZJ4;E1JGZ9	Proteasome subunit alpha type-6;Proteasome subunit alpha type	Prosalpha1	>sp|Q9XZJ4|PSA6_DROME Proteasome subunit alpha type-6 OS=Drosophila melanogaster GN=Prosalpha1 PE=1 SV=2;>tr|E1JGZ9|E1JGZ9_DROME Proteasome subunit alpha type OS=Drosophila melanogaster GN=CG30382 PE=3 SV=1	0	Both	Rel_Homo_92	low	Both	0.159658	0.241724	0	0	NA	NA	0	1	0	0	1	0	0	0	0	1	1	0	0	7.55	0	NA	3	1	19	7	3	15	7.27386	8.8621	8.31012	9.76804	10.4982	9.94983	6.01858	6.87323	7.05484	7.7954	9.24296	8.69455
493	Q86S05-3;E1JH02;Q86S05-2;Q86S05	Protein lingerer	lig	>sp|Q86S05-3|LIG_DROME Isoform B of Protein lingerer OS=Drosophila melanogaster GN=lig;>tr|E1JH02|E1JH02_DROME Lingerer, isoform E OS=Drosophila melanogaster GN=lig PE=4 SV=1;>sp|Q86S05-2|LIG_DROME Isoform A of Protein lingerer OS=Drosophila melanogaster G	0	Both	Rel_Homo_92	medium	Both	4.33513	3.98917	0	0	NA	NA	0	1	0	1	0	1	1	1	1	0	0	0	0	5.96	0	NA	6	1	21	18	4	20	6.73011	9.7209	8.22866	11.0263	9.85213	9.89809	5.31515	7.50122	6.81369	8.80153	8.43715	8.48312
499	P48809;E1JHA4	Heterogeneous nuclear ribonucleoprotein 27C	Hrb27C	>sp|P48809|RB27C_DROME Heterogeneous nuclear ribonucleoprotein 27C OS=Drosophila melanogaster GN=Hrb27C PE=1 SV=2;>tr|E1JHA4|E1JHA4_DROME Heterogeneous nuclear ribonucleoprotein at 27C, isoform D OS=Drosophila melanogaster GN=Hrb27C PE=4 SV=1	0	Both	known285	high	Both	28.2459	89.4033	1	1	RRM_1	2	1	1	1	1	1	1	1	1	1	0	1	1	1	6.33	0	no	8	11	13	22	13	12	9.29508	10.9295	9.61524	12.5075	10.1467	9.92013	8.18113	8.91077	8.50131	10.4751	9.03274	8.80619
516	M9PIA6;O97159;E1JI46;Q59E34	Chromodomain-helicase-DNA-binding protein Mi-2 homolog	Mi-2	>tr|M9PIA6|M9PIA6_DROME Mi-2, isoform D OS=Drosophila melanogaster GN=Mi-2 PE=4 SV=1;>sp|O97159|CHDM_DROME Chromodomain-helicase-DNA-binding protein Mi-2 homolog OS=Drosophila melanogaster GN=Mi-2 PE=1 SV=2;>tr|E1JI46|E1JI46_DROME Mi-2, isoform C OS=Drosop	0	Both	Rel_Homo_92	medium	Both	3.78781	0.628554	0	0	NA	NA	0	0	1	0	0	0	0	0	0	0	0	0	0	5.54	0	yes	10	3	38	15	14	19	7.17557	9.1515	8.08479	9.53883	9.38847	9.32245	5.22134	6.4397	6.13056	6.88406	7.43423	7.36819
530	P31409;E1JIJ5	V-type proton ATPase subunit B	Vha55	>sp|P31409|VATB_DROME V-type proton ATPase subunit B OS=Drosophila melanogaster GN=Vha55 PE=2 SV=1;>tr|E1JIJ5|E1JIJ5_DROME Vacuolar H[+]-ATPase 55kD B subunit, isoform C OS=Drosophila melanogaster GN=Vha55 PE=3 SV=1	0	Both	Rel_Homo_92	low	Both	0.0440791	0.101838	0	0	NA	NA	0	0	1	0	1	0	0	0	0	1	1	0	0	5.25	0	NA	3	0	27	9	3	28		8.13358	8.14151	9.50453	10.389	10.0811		6.04528	6.72655	7.39155	8.97398	8.66612
531	P48810;E1JIK0;P48810-2	Heterogeneous nuclear ribonucleoprotein 87F	Hrb87F	>sp|P48810|RB87F_DROME Heterogeneous nuclear ribonucleoprotein 87F OS=Drosophila melanogaster GN=Hrb87F PE=2 SV=2;>tr|E1JIK0|E1JIK0_DROME Heterogeneous nuclear ribonucleoprotein at 87F, isoform C OS=Drosophila melanogaster GN=Hrb87F PE=2 SV=1;>sp|P48810-2|	0	Both	known285	high	Both	15.9522	37.4409	1	1	RRM_1	2	1	1	1	1	1	1	1	1	1	0	1	1	1	9.05	0	NA	12	6	13	34	8	15	8.61885	10.121	8.65549	12.1193	9.65327	9.93837	7.44276	8.10707	7.4794	10.0532	8.47718	8.76228
557	P48149;E1JJM9	40S ribosomal protein S15Aa	RpS15Aa	>sp|P48149|RS15A_DROME 40S ribosomal protein S15Aa OS=Drosophila melanogaster GN=RpS15Aa PE=1 SV=2;>tr|E1JJM9|E1JJM9_DROME Ribosomal protein S15Aa, isoform F OS=Drosophila melanogaster GN=RpS15Aa PE=3 SV=1	0	Both	known285	medium	Both	1.94189	0.355819	0	1	Ribosomal_S8	1	1	1	1	1	1	1	1	1	0	0	1	1	0	9.84	1	NA	5	2	11	6	3	10	7.83939	10.1715	8.46869	9.68266	10.6142	9.70281	6.88515	8.37522	7.51444	8.01733	9.65993	8.74857
561	Q9VWI1;E1JJR3		pcm	>tr|Q9VWI1|Q9VWI1_DROME LD22664p OS=Drosophila melanogaster GN=pcm PE=2 SV=1;>tr|E1JJR3|E1JJR3_DROME Pacman, isoform B OS=Drosophila melanogaster GN=pcm PE=1 SV=1	0	Both	known285	high	Both	25.8672	63.5184	0	1	XRN_N	1	1	1	1	1	1	1	1	1	0	0	1	1	1	6.58	0	NA	21	3	26	52	6	6	7.3241	9.71734	7.47888	10.8431	9.07309	8.52633	5.46078	7.04961	5.61557	8.18344	7.20978	6.66301
567	Q7KNF2;E2QC83	Polyadenylate-binding protein 2	Pabp2	>sp|Q7KNF2|PABP2_DROME Polyadenylate-binding protein 2 OS=Drosophila melanogaster GN=Pabp2 PE=2 SV=1;>tr|E2QC83|E2QC83_DROME Pabp2, isoform B OS=Drosophila melanogaster GN=Pabp2 PE=4 SV=1	0	Both	known285	high	Both	125.854	114.568	1	1	RRM_1	1	1	1	1	1	1	1	1	1	1	0	1	1	0	5.16	0	NA	2	1	3	13	4	4	6.90885	9.5595	8.29228	11.2843	8.24122	8.67898	5.90885	7.76816	7.29228	9.45558	7.24122	7.67898
569	E2QCF1		ATPCL	>tr|E2QCF1|E2QCF1_DROME ATP citrate lyase, isoform F OS=Drosophila melanogaster GN=ATPCL PE=4 SV=1	0	Both	new99	low	Both	0.365941	0.876944	0	0	NA	NA	0	0	0	0	1	0	0	0	0	0	1	0	0	6.7	0	NA	7	1	47	5	1	11	6.56341	8.95569	5.9178	8.69734	10.2239	8.39813	4.81523	6.46616	4.16962	6.31044	8.47567	6.64994
570	Q0E940;E2QCG7	Eukaryotic translation initiation factor 3 subunit B	eIF3-S9	>sp|Q0E940|EIF3B_DROME Eukaryotic translation initiation factor 3 subunit B OS=Drosophila melanogaster GN=eIF3-S9 PE=1 SV=1;>tr|E2QCG7|E2QCG7_DROME Eukaryotic translation initiation factor 3 subunit B OS=Drosophila melanogaster GN=eIF3-S9 PE=3 SV=1	0	Both	known285	medium	Both	0.0522059	3.46162	1	1	eIF2A;RRM_1	1;1	1	1	1	1	1	0	0	1	0	1	1	1	0	5.92	0	NA	2	1	34	29	5	31	6.83733	8.00277	7.40466	10.5522	10.1955	9.52046	5.31881	5.82179	5.88614	8.25876	8.677	8.00195
574	Q24009;E2QCR4	Protein bicaudal C	BicC	>sp|Q24009|BICC_DROME Protein bicaudal C OS=Drosophila melanogaster GN=BicC PE=1 SV=2;>tr|E2QCR4|E2QCR4_DROME Bicaudal C, isoform B OS=Drosophila melanogaster GN=BicC PE=4 SV=1	0	Both	known285	high	Both	43.184	298.013	1	1	KH_1	2	1	1	1	1	1	1	0	1	0	0	1	1	1	8.8	0	NA	19	9	25	39	18	9	8.19271	10.3943	8.94514	11.9023	9.4715	8.83641	6.70133	8.04254	7.45378	9.53682	7.98014	7.34506
575	Q9VQ76;E2QCS8;M9PE28		tho2	>tr|Q9VQ76|Q9VQ76_DROME LD36155p OS=Drosophila melanogaster GN=tho2 PE=2 SV=2;>tr|E2QCS8|E2QCS8_DROME Tho2, isoform B OS=Drosophila melanogaster GN=tho2 PE=4 SV=1;>tr|M9PE28|M9PE28_DROME Tho2, isoform C OS=Drosophila melanogaster GN=tho2 PE=4 SV=1	0	Both	known285	low	Both	0.514529	1.34602	0	1	Tho2;Thoc2	1;1	1	1	1	0	1	0	0	0	0	0	1	1	1	8.98	0	NA	2	1	24	7	2	5	6.29839	7.79705	7.02788	8.87587	9.01313	8.37745	4.42915	5.28237	5.15866	6.3548	7.14389	6.50822
581	Q7K4H4;E2QD64	Bifunctional lysine-specific demethylase and histidyl-hydroxylase NO66	CG2982	>sp|Q7K4H4|NO66_DROME Bifunctional lysine-specific demethylase and histidyl-hydroxylase NO66 OS=Drosophila melanogaster GN=CG2982 PE=1 SV=1;>tr|E2QD64|E2QD64_DROME CG2982 OS=Drosophila melanogaster GN=CG2982 PE=4 SV=1	0	Both	Rel_Homo_92	low	Both	0.215483	1.29683	0	0	NA	NA	0	0	1	0	0	0	0	0	0	0	0	0	0	7.9	0	NA	2	1	26	13	0	11	6.52651	8.10138		9.59657	9.67026	9.06138	4.9583	5.86254		7.3236	8.10206	7.49319
582	P39018;E2QD65	40S ribosomal protein S19a	RpS19a	>sp|P39018|RS19A_DROME 40S ribosomal protein S19a OS=Drosophila melanogaster GN=RpS19a PE=1 SV=3;>tr|E2QD65|E2QD65_DROME Ribosomal protein S19a, isoform C OS=Drosophila melanogaster GN=RpS19a PE=4 SV=1	0	Both	known285	low	Both	0.833977	0.83741	0	1	Ribosomal_S19e	1	1	1	1	1	1	0	1	1	1	1	1	0	0	10.12	1	NA	6	6	12	16	2	12	8.41155	9.90951	7.70013	11.2622	10.741	10.7947	7.33238	8.01	6.62096	9.35597	9.66177	9.7155
583	Q7K4N3;E2QD75	Nuclear cap-binding protein subunit 1	Cbp80	>sp|Q7K4N3|NCBP1_DROME Nuclear cap-binding protein subunit 1 OS=Drosophila melanogaster GN=Cbp80 PE=1 SV=1;>tr|E2QD75|E2QD75_DROME Cap binding protein 80, isoform B OS=Drosophila melanogaster GN=Cbp80 PE=4 SV=1	0	Both	known285	medium	Both	1.20214	16.9732	1	1	MIF4G;MIF4G_like;MIF4G_like_2	1;1;1	1	1	1	1	1	0	1	0	0	0	1	1	1	6.09	0	NA	2	0	22	5	0	1		8.42665		8.79913	9.22207	7.20564		6.10585		6.52967	7.59882	5.58238
585	Q9VWH4;E4NKP2;Q9VWH4-2;Q8T0R3	Probable isocitrate dehydrogenase [NAD] subunit alpha, mitochondrial	l(1)G0156;l(1)G0156-RB	>sp|Q9VWH4|IDH3A_DROME Probable isocitrate dehydrogenase [NAD] subunit alpha, mitochondrial OS=Drosophila melanogaster GN=l(1)G0156 PE=2 SV=1;>tr|E4NKP2|E4NKP2_DROME LP13001p1 OS=Drosophila melanogaster GN=l(1)G0156 PE=2 SV=2;>sp|Q9VWH4-2|IDH3A_DROME Isofo	0	Both	new99	low	Both	0.299266	0.0253729	0	0	NA	NA	0	0	0	0	1	0	0	0	0	1	1	0	0	6.96	0	NA	4	4	26	2	1	25	7.74188	8.99182	6.56025	9.01788	10.3443	10.2338	6.41966	6.92527	5.23802	7.03342	9.02214	8.91153
586	Q8SWU7;E6PBV6;Q8SWU7-2	Obg-like ATPase 1	CG1354;CG1354-RA	>sp|Q8SWU7|OLA1_DROME Obg-like ATPase 1 OS=Drosophila melanogaster GN=CG1354 PE=1 SV=1;>tr|E6PBV6|E6PBV6_DROME AT07526p OS=Drosophila melanogaster GN=CG1354-RA PE=2 SV=1;>sp|Q8SWU7-2|OLA1_DROME Isoform B of Obg-like ATPase 1 OS=Drosophila melanogaster GN=C	0	Both	known285	low	Both	0.0727993	0.0867797	0	1	MMR_HSR1	1	1	0	1	1	1	0	0	1	1	1	1	1	0	6.26	0	NA	2	0	24	10	0	22		7.77441		9.01513	9.84165	9.69712		5.75064		6.97286	8.46144	8.31691
599	L0MLQ9;Q8IH18;Q9V486		CG11097	>tr|L0MLQ9|L0MLQ9_DROME CG32016, isoform H OS=Drosophila melanogaster GN=CG32016 PE=4 SV=1;>tr|Q8IH18|Q8IH18_DROME CG32016, isoform B OS=Drosophila melanogaster GN=CG11097 PE=2 SV=1	0	Both	known285	high	Both	36.7198	24.3793	0	1	EIF4E.T	1	1	0	0	0	0	0	0	0	0	0	0	0	0	8.73	0	NA	10	2	10	20	0	7	7.15171	9.32898		10.142	8.56476	8.29265	5.47962	6.88463		7.7251	6.89266	6.62055
603	P36179;M9MQH9;M9NDI6	Serine/threonine-protein phosphatase PP2A 65 kDa regulatory subunit	Pp2A-29B	>sp|P36179|2AAA_DROME Serine/threonine-protein phosphatase PP2A 65 kDa regulatory subunit OS=Drosophila melanogaster GN=Pp2A-29B PE=2 SV=4;>tr|M9MQH9|M9MQH9_DROME Protein phosphatase 2A at 29B, isoform C OS=Drosophila melanogaster GN=Pp2A-29B PE=4 SV=1;>tr	0	Both	new99	low	Both	0.13527	0.0158217	0	0	NA	NA	0	0	0	0	0	0	0	0	0	1	0	0	0	4.91	0	NA	5	3	28	6	0	27	7.3751	8.81379		8.89587	10.5259	10.3258	5.94373	6.65282		6.81119	9.09454	8.89441
604	P41092;M9MRC9	60S ribosomal protein L27a	RpL27A	>sp|P41092|RL27A_DROME 60S ribosomal protein L27a OS=Drosophila melanogaster GN=RpL27A PE=1 SV=2;>tr|M9MRC9|M9MRC9_DROME Ribosomal protein L27A, isoform C OS=Drosophila melanogaster GN=RpL27A PE=3 SV=1	0	Both	known285	low	Both	0.422632	0.209624	0	1	Ribosomal_L18e	1	1	1	1	1	1	0	1	1	1	0	1	1	0	10.71	1	NA	4	2	6	5	0	5	7.80762	9.21492		9.65564	10.3991	9.90757	6.96253	7.607		8.10144	9.55397	9.06247
617	Q94522;M9MRQ9;Q9VDW7	Succinyl-CoA ligase [ADP/GDP-forming] subunit alpha, mitochondrial	Scsalpha	>sp|Q94522|SUCA_DROME Succinyl-CoA ligase [ADP/GDP-forming] subunit alpha, mitochondrial OS=Drosophila melanogaster GN=Scsalpha PE=2 SV=3;>tr|M9MRQ9|M9MRQ9_DROME Succinyl coenzyme A synthetase alpha subunit, isoform B OS=Drosophila melanogaster GN=Scsalpha	0	Both	Rel_Homo_92	low	Both	0.371377	0.222255	0	0	NA	NA	0	0	1	1	1	1	0	0	0	0	1	0	0	9.14	0	NA	2	0	15	4	0	9		8.78029		9.06918	10.0566	9.33878		6.87737		7.22706	8.88048	8.16268
631	M9MSL3;Q9VUC1		Hsc70Cb	>tr|M9MSL3|M9MSL3_DROME Hsc70Cb, isoform G OS=Drosophila melanogaster GN=Hsc70Cb PE=3 SV=1;>tr|Q9VUC1|Q9VUC1_DROME Hsc70Cb, isoform A OS=Drosophila melanogaster GN=Hsc70Cb PE=2 SV=1	not_confirmed	Both	new99	low	Both	0.119181	0.0193415	0	0	NA	NA	0	0	0	0	1	0	0	0	0	0	1	1	0	5.24	0	NA	8	5	45	10	1	42	7.56914	9.08211	6.87704	9.23752	10.827	10.5551	5.89704	6.65819	5.20493	6.88703	9.15491	8.88301
646	O18388;M9NDC3	Importin subunit beta	Fs(2)Ket	>sp|O18388|IMB_DROME Importin subunit beta OS=Drosophila melanogaster GN=Fs(2)Ket PE=2 SV=2;>tr|M9NDC3|M9NDC3_DROME Female sterile (2) ketel, isoform B OS=Drosophila melanogaster GN=Fs(2)Ket PE=4 SV=1	0	Both	known285	low	Both	0.558812	0.855345	0	1	IBN_N	1	1	1	0	1	1	0	1	1	0	0	1	0	0	4.92	0	NA	7	3	47	18	2	28	7.21614	9.39753	7.14607	9.70547	10.4453	9.34305	5.56293	6.9664	5.49284	7.33951	8.79206	7.68984
661	M9NH51;Q24562;M9NDZ4;M9NF89;Q9W1T4	Splicing factor U2AF 50 kDa subunit	U2af50	>tr|M9NH51|M9NH51_DROME U2 small nuclear riboprotein auxiliary factor 50, isoform C OS=Drosophila melanogaster GN=U2af50 PE=4 SV=1;>sp|Q24562|U2AF2_DROME Splicing factor U2AF 50 kDa subunit OS=Drosophila melanogaster GN=U2af50 PE=2 SV=1;>tr|M9NDZ4|M9NDZ4_D	0	Both	known285	medium	Both	0.344221	5.25297	1	1	RRM_1;RRM_5;RRM_6	1;1;1	1	1	1	1	0	1	1	1	1	1	0	0	0	5.12	0	NA	2	0	5	11	0	6		7.41054		10.1326	8.83319	8.95052		5.65097		8.24232	7.68706	7.80438
677	Q9VWG3;M9NEQ9;Q9VB14	40S ribosomal protein S10b	RpS10b	>sp|Q9VWG3|RS10B_DROME 40S ribosomal protein S10b OS=Drosophila melanogaster GN=RpS10b PE=1 SV=2;>tr|M9NEQ9|M9NEQ9_DROME Ribosomal protein S10b, isoform D OS=Drosophila melanogaster GN=RpS10b PE=4 SV=1	0	Both	known285	low	Both	0.758681	0.385838	0	1	S10_plectin	1	1	1	1	1	1	1	1	1	1	0	1	1	0	9.79	1	no	6	6	9	10	2	9	8.82187	9.89902	7.13669	11.2584	10.7724	11.1277	7.82187	8.07958	6.13669	9.43159	9.77245	10.1277
686	M9NF14;E1JJM0		Imp	>tr|M9NF14|M9NF14_DROME IGF-II mRNA-binding protein, isoform L OS=Drosophila melanogaster GN=Imp PE=4 SV=1;>tr|E1JJM0|E1JJM0_DROME FI20063p1 OS=Drosophila melanogaster GN=Imp PE=2 SV=1	0	Both	known285	high	Both	62.4949	207.864	1	1	KH_1;RRM_1	4;1	1	1	1	1	0	1	1	1	1	0	0	0	0	8.35	0	NA	23	9	23	38	26	16	8.36504	11.0484	9.65226	12.3506	9.91094	9.40824	6.87368	8.64249	8.16089	9.95218	8.41958	7.91687
687	M9NF18;Q9VYW5;M9NED4			>tr|M9NF18|M9NF18_DROME CG2247, isoform D OS=Drosophila melanogaster GN=CG2247 PE=4 SV=1;>tr|Q9VYW5|Q9VYW5_DROME CG2247, isoform A OS=Drosophila melanogaster GN=CG2247 PE=2 SV=1;>tr|M9NED4|M9NED4_DROME CG2247, isoform C OS=Drosophila melanogaster GN=CG2247	0	Both	new99	medium	Both	2.96232	0.545201	0	0	NA	NA	0	0	0	0	0	0	0	0	0	0	0	0	0	9.06	0	NA	2	0	10	3	0	3		8.1791		8.3921	8.60333	8.3217		5.83928		6.11304	6.94057	6.65896
689	M9NF33;Q9VSH4	Cleavage and polyadenylation specificity factor subunit CG7185	CG7185	>tr|M9NF33|M9NF33_DROME CG7185, isoform B OS=Drosophila melanogaster GN=CG7185 PE=4 SV=1;>sp|Q9VSH4|CPSF6_DROME Cleavage and polyadenylation specificity factor subunit CG7185 OS=Drosophila melanogaster GN=CG7185 PE=1 SV=2	0	Both	known285	medium	Both	3.24879	1.80673	1	1	RRM_1	1	1	1	1	1	0	1	1	1	1	0	0	0	0	9.5	0	NA	4	0	9	7	0	10		8.71899		10.1989	9.05843	9.4755		6.67502		8.12769	7.73622	8.15327
698	P41073-3;M9NG39;P41073;P41073-2	Zinc finger protein on ecdysone puffs	Pep	>sp|P41073-3|PEP_DROME Isoform C of Zinc finger protein on ecdysone puffs OS=Drosophila melanogaster GN=Pep;>tr|M9NG39|M9NG39_DROME Protein on ecdysone puffs, isoform D OS=Drosophila melanogaster GN=Pep PE=4 SV=1;>sp|P41073|PEP_DROME Zinc finger protein on	Validated	Both	known285	high	Both	29.0661	8.00044	1	1	zf.met	1	1	0	1	0	0	0	0	0	0	0	0	0	0	5.46	0	yes	13	3	19	26	3	21	7.5877	10.5124	7.41074	11.6249	9.75168	10.1506	6.15634	8.21077	5.97938	9.33985	8.32031	8.71921
713	P31009;M9PB84	40S ribosomal protein S2	RpS2	>sp|P31009|RS2_DROME 40S ribosomal protein S2 OS=Drosophila melanogaster GN=RpS2 PE=1 SV=2;>tr|M9PB84|M9PB84_DROME Ribosomal protein S2, isoform B OS=Drosophila melanogaster GN=RpS2 PE=3 SV=1	0	Both	known285	high	Both	5.55234	119.284	1	1	Ribosomal_S5;Ribosomal_S5_C	1;1	1	1	1	1	1	1	1	1	1	1	1	1	0	10.16	1	NA	15	10	18	28	16	16	8.48698	10.8382	9.6549	12.6687	10.7695	9.94421	7.28287	8.73689	8.45077	10.5342	9.56534	8.74009
715	Q9VKY2;M9PB90	Cullin-associated NEDD8-dissociated protein 1	Cand1	>sp|Q9VKY2|CAND1_DROME Cullin-associated NEDD8-dissociated protein 1 OS=Drosophila melanogaster GN=Cand1 PE=2 SV=1;>tr|M9PB90|M9PB90_DROME Cullin-associated and neddylation-dissociated 1, isoform B OS=Drosophila melanogaster GN=Cand1 PE=4 SV=1	0	Both	new99	low	Both	0.705937	0.83643	0	0	NA	NA	0	0	0	1	0	0	0	1	0	0	0	0	0	5.56	0	NA	10	4	53	14	0	13	7.35852	9.05445		9.01131	10.0291	8.70958	5.5456	6.49201		6.53662	8.21617	6.89666
716	M9PCL9;M9PFI0;M9PB92			>tr|M9PCL9|M9PCL9_DROME Cnot 4 homologue, isoform L OS=Drosophila melanogaster GN=Cnot4 PE=4 SV=1;>tr|M9PFI0|M9PFI0_DROME Cnot 4 homologue, isoform J OS=Drosophila melanogaster GN=Cnot4 PE=4 SV=1;>tr|M9PB92|M9PB92_DROME Cnot 4 homologue, isoform K OS=Droso	0	Both	known285	medium	Both	3.58908	2.61565	0	1	RRM_1	1	1	1	0	1	1	0	1	1	1	0	0	1	0	6.27	0	no	4	1	12	17	0	14	6.2295	8.34238		9.92258	8.66974	9.05877	4.59605	6.01833		7.5604	7.03627	7.42529
719	P09052;M9PBB5;B6JUP5	ATP-dependent RNA helicase vasa, isoform A	vas	>sp|P09052|VASA1_DROME ATP-dependent RNA helicase vasa, isoform A OS=Drosophila melanogaster GN=vas PE=1 SV=3;>tr|M9PBB5|M9PBB5_DROME Vasa, isoform C OS=Drosophila melanogaster GN=vas PE=4 SV=1	0	Both	known285	high	Both	16.9834	82.7676	1	1	DEAD	1	1	0	1	0	0	0	0	0	0	0	0	0	0	5.46	0	NA	27	4	29	43	11	19	7.37769	10.2395	8.14414	11.7543	9.73474	9.25568	5.69645	7.7106	6.46291	9.20984	8.0535	7.57445
731	P02828;M9PBL3	Heat shock protein 83	Hsp83	>sp|P02828|HSP83_DROME Heat shock protein 83 OS=Drosophila melanogaster GN=Hsp83 PE=1 SV=1;>tr|M9PBL3|M9PBL3_DROME Heat shock protein 83, isoform B OS=Drosophila melanogaster GN=Hsp83 PE=3 SV=1	0	Both	Rel_Homo_92	low	Both	0.369245	0.0505219	0	0	NA	NA	0	0	1	1	1	1	1	1	1	1	1	0	0	4.9	0	NA	26	24	58	28	21	58	9.26446	10.3952	9.24294	10.7951	11.5403	11.5813	7.73298	8.0032	7.71145	8.47081	10.0088	10.0498
745	P48598;M9PBZ9;P48598-2	Eukaryotic translation initiation factor 4E	eIF-4E	>sp|P48598|IF4E_DROME Eukaryotic translation initiation factor 4E OS=Drosophila melanogaster GN=eIF-4E PE=1 SV=1;>tr|M9PBZ9|M9PBZ9_DROME Eukaryotic initiation factor 4E, isoform H OS=Drosophila melanogaster GN=eIF-4E PE=3 SV=1;>sp|P48598-2|IF4E_DROME Isofo	0	Both	known285	medium	Both	1.80341	1.57556	1	1	IF4E	1	1	1	1	1	1	0	1	1	0	0	1	1	0	5.83	0	NA	7	3	14	14	5	14	7.94268	9.54826	7.98005	11.0818	10.0747	10.353	6.90129	7.71647	6.93866	9.22655	9.0333	9.31158
750	M9PC85;Q9V3V0		x16	>tr|M9PC85|M9PC85_DROME X16, isoform B OS=Drosophila melanogaster GN=x16 PE=4 SV=1;>tr|Q9V3V0|Q9V3V0_DROME DXl6 protein OS=Drosophila melanogaster GN=x16 PE=2 SV=1	0	Both	known285	high	Both	375.366	14.8403	1	1	RRM_1	1	1	1	1	1	1	1	1	1	1	0	1	1	1	11.53	0	NA	5	0	3	8	3	4		10.2627	7.89286	10.9966	8.41167	9.30007		8.29925	6.77891	9.07511	7.29772	8.18614
751	P17133;M9PC89	U1 small nuclear ribonucleoprotein 70 kDa	snRNP-U1-70K	>sp|P17133|RU17_DROME U1 small nuclear ribonucleoprotein 70 kDa OS=Drosophila melanogaster GN=snRNP-U1-70K PE=1 SV=2;>tr|M9PC89|M9PC89_DROME Small ribonucleoprotein particle U1 subunit 70K, isoform B OS=Drosophila melanogaster GN=snRNP-U1-70K PE=4 SV=1	0	Both	known285	medium	Both	3.469	0.649899	1	1	RRM_1;U1snRNP70_N	1;1	1	1	1	1	0	1	1	1	1	0	0	0	0	10.04	0	NA	3	0	8	10	0	8		8.23061		9.55769	8.582	9.32541		6.20685		7.51336	7.23957	7.98299
753	Q9VQ94;M9PC99		gho	>tr|Q9VQ94|Q9VQ94_DROME Ghost, isoform A OS=Drosophila melanogaster GN=gho PE=2 SV=2;>tr|M9PC99|M9PC99_DROME Ghost, isoform C OS=Drosophila melanogaster GN=gho PE=4 SV=1	0	Both	new99	medium	Both	0.893553	18.9853	0	0	NA	NA	0	0	0	0	1	0	0	0	0	0	1	0	0	6.89	0	NA	6	1	25	12	2	4	6.89228	8.7982	7.03989	9.47296	9.6917	7.78135	5.30123	6.47884	5.44883	7.18622	8.10065	6.19028
756	O18640;M9PCC1;M9PB67	Guanine nucleotide-binding protein subunit beta-like protein	Rack1	>sp|O18640|GBLP_DROME Guanine nucleotide-binding protein subunit beta-like protein OS=Drosophila melanogaster GN=Rack1 PE=1 SV=2;>tr|M9PCC1|M9PCC1_DROME Receptor of activated protein kinase C 1, isoform C OS=Drosophila melanogaster GN=Rack1 PE=4 SV=1	Validated	Both	Rel_Homo_92	medium	Both	0.308362	1.76626	0	0	NA	NA	0	0	1	1	1	1	1	1	1	1	1	1	0	7.14	0	NA	8	4	22	23	8	21	8.3379	9.56776	8.04135	11.0039	10.8596	10.2312	7.03687	7.47471	6.74031	8.89473	9.55858	8.93014
784	M9PD27;Q9VPH7;M9PFR9	Eukaryotic peptide chain release factor subunit 1	eRF1	>tr|M9PD27|M9PD27_DROME Eukaryotic release factor 1, isoform H OS=Drosophila melanogaster GN=eRF1 PE=4 SV=1;>sp|Q9VPH7|ERF1_DROME Eukaryotic peptide chain release factor subunit 1 OS=Drosophila melanogaster GN=eRF1 PE=1 SV=2;>tr|M9PFR9|M9PFR9_DROME Eukaryo	0	Both	known285	low	Both	0.325877	0.253669	1	1	eRF1_1;eRF1_2;eRF1_3	1;1;1	1	1	1	1	1	1	0	1	1	0	1	1	0	5.76	0	NA	4	3	17	9	1	17	7.24915	8.48468	7.87637	9.46362	9.84219	9.64682	5.86894	6.40211	6.49615	7.3884	8.46198	8.26661
785	M9PDG3;P40798-2;M9PD57;P40798	Protein shuttle craft	stc	>tr|M9PDG3|M9PDG3_DROME Shuttle craft, isoform C OS=Drosophila melanogaster GN=stc PE=4 SV=1;>sp|P40798-2|STC_DROME Isoform B of Protein shuttle craft OS=Drosophila melanogaster GN=stc;>tr|M9PD57|M9PD57_DROME Shuttle craft, isoform D OS=Drosophila melanoga	0	Both	known285	high	Both	53.6555	YW whole not available	1	1	R3H	1	1	1	1	1	0	1	1	0	0	0	0	0	0	8.75	0	yes	8	3	2	17	1	1	7.2229	9.00651	6.50572	9.839	8.10428		5.52393	6.56198	4.80675	7.41746	6.4053
791	P16568;M9PDL9;M9PDB8;M9NDR2	Protein bicaudal D	BicD	>sp|P16568|BICD_DROME Protein bicaudal D OS=Drosophila melanogaster GN=BicD PE=1 SV=2;>tr|M9PDL9|M9PDL9_DROME Bicaudal D, isoform C OS=Drosophila melanogaster GN=BicD PE=4 SV=1;>tr|M9PDB8|M9PDB8_DROME Bicaudal D, isoform D OS=Drosophila melanogaster GN=Bic	0	Both	Rel_Homo_92	medium	Both	2.41361	0.72123	0	0	NA	NA	0	0	1	0	0	0	0	0	0	0	0	0	0	5.08	0	NA	7	0	23	31	0	42		8.67059		10.3232	9.14311	9.98944		6.29008		7.90229	7.48034	8.32668
798	P15348;M9PDQ1	DNA topoisomerase 2	Top2	>sp|P15348|TOP2_DROME DNA topoisomerase 2 OS=Drosophila melanogaster GN=Top2 PE=1 SV=1;>tr|M9PDQ1|M9PDQ1_DROME DNA topoisomerase 2 OS=Drosophila melanogaster GN=Top2 PE=3 SV=1	0	Both	known285	high	Both	8.56429	170.005	1	0	NA	NA	1	0	1	1	1	0	1	0	0	0	0	1	0	8.36	0	no	23	5	50	61	22	10	7.61351	10.0739	8.29482	11.0436	9.88021	8.28454	5.71589	7.34234	6.39719	8.33492	7.98258	6.38693
804	M9PE74;Q9W2U7		nocte	>tr|M9PE74|M9PE74_DROME No circadian temperature entrainment, isoform D OS=Drosophila melanogaster GN=nocte PE=4 SV=1;>tr|Q9W2U7|Q9W2U7_DROME LP18708p OS=Drosophila melanogaster GN=nocte PE=2 SV=4	0	Both	new99	medium	Both	1.98703	0.479125	0	0	NA	NA	0	0	0	0	0	0	0	0	0	0	0	0	0	9.26	0	NA	8	3	33	25	3	34	7.47823	9.22113	7.51435	10.0401	9.73253	9.90475	5.63938	6.61896	5.67549	7.46389	7.89368	8.06592
825	Q9VM71;M9PEY6	5-3 exoribonuclease 2 homolog	Rat1	>sp|Q9VM71|XRN2_DROME 5-3 exoribonuclease 2 homolog OS=Drosophila melanogaster GN=Rat1 PE=1 SV=2;>tr|M9PEY6|M9PEY6_DROME Rat1, isoform B OS=Drosophila melanogaster GN=Rat1 PE=4 SV=1	0	Both	known285	high	Both	19.0147	507.196	0	1	XRN_N	1	1	1	1	1	1	1	1	1	1	1	1	1	1	6.61	0	NA	11	2	16	33	2	1	6.81656	9.10283	6.7588	10.4513	8.64313	7.26112	5.1731	6.70584	5.11534	8.04036	6.99967	5.61766
828	M9PF14;M9PF20			>tr|M9PF14|M9PF14_DROME Trailer hitch, isoform C OS=Drosophila melanogaster GN=tral PE=4 SV=1;>tr|M9PF20|M9PF20_DROME Trailer hitch, isoform H OS=Drosophila melanogaster GN=tral PE=4 SV=1	0	Both	known285	high	Both	23.6208	20.4585	0	1	FDF;LSM14	2;1	1	1	0	1	1	0	1	1	1	0	0	1	0	9.5	0	no	29	28	29	40	27	28	10.0424	11.4692	10.2895	12.6092	10.7194	10.6548	8.64445	9.12182	8.89155	10.2853	9.32145	9.25689
845	Q9VV82;M9PFR8;M9PFW8;Q9I7R5			>tr|Q9VV82|Q9VV82_DROME CG32164, isoform A OS=Drosophila melanogaster GN=CG32164 PE=4 SV=2;>tr|M9PFR8|M9PFR8_DROME CG32164, isoform B OS=Drosophila melanogaster GN=CG32164 PE=4 SV=1;>tr|M9PFW8|M9PFW8_DROME CG32165, isoform B OS=Drosophila melanogaster GN=C	0	Both	known285	low	Both	0.520808	0.65094	0	1	IBN_N	1	1	1	0	1	1	0	0	1	0	0	1	1	0	4.74	0	NA	9	3	39	10	0	22	7.37638	9.03373		8.93267	10.1422	8.7456	5.66881	6.57835		6.56909	8.4346	7.03802
858	P13008;M9PG47	40S ribosomal protein S26	RpS26	>sp|P13008|RS26_DROME 40S ribosomal protein S26 OS=Drosophila melanogaster GN=RpS26 PE=1 SV=1;>tr|M9PG47|M9PG47_DROME Ribosomal protein S26, isoform D OS=Drosophila melanogaster GN=RpS26 PE=4 SV=1	0	Both	known285	high	Both	0.812528	30.1779	0	1	Ribosomal_S26e	1	1	1	1	1	1	1	1	1	1	1	1	1	0	11.15	1	NA	3	3	4	3	3	3	8.09639	9.29127	8.00783	11.2971	10.1852	9.27024	7.61927	8.04501	7.5307	9.99034	9.7081	8.79313
888	Q8MSX1-3;M9PH77			>sp|Q8MSX1-3|ENC_DROME Isoform A of Protein encore OS=Drosophila melanogaster GN=enc;>tr|M9PH77|M9PH77_DROME Encore, isoform F OS=Drosophila melanogaster GN=enc PE=4 SV=1	0	Both	known285	high	Both	7.01033	90.2271	0	1	R3H	1	1	1	1	1	0	1	1	1	1	0	0	0	0	8.82	0	NA	3	2	3	13	0	3	6.69614	8.37237		10.5292	8.40649	8.08307	5.12795	6.11109		8.18772	6.83828	6.51485
896	Q9VS34;M9PHM6	60S ribosomal protein L18	RpL18	>sp|Q9VS34|RL18_DROME 60S ribosomal protein L18 OS=Drosophila melanogaster GN=RpL18 PE=1 SV=1;>tr|M9PHM6|M9PHM6_DROME 60S ribosomal protein L18 OS=Drosophila melanogaster GN=RpL18 PE=3 SV=1	0	Both	known285	medium	Both	0.188642	2.48898	0	1	Ribosomal_L18e	manual	1	1	1	1	1	0	0	1	0	1	1	1	0	11.54	1	NA	4	4	11	5	3	4	8.04489	9.05228	7.6481	9.19495	10.6002	8.40613	7.14179	7.39985	6.74501	7.61659	9.69713	7.50304
916	O61231;M9PIM0	60S ribosomal protein L10	RpL10	>sp|O61231|RL10_DROME 60S ribosomal protein L10 OS=Drosophila melanogaster GN=RpL10 PE=1 SV=1;>tr|M9PIM0|M9PIM0_DROME Ribosomal protein L10, isoform E OS=Drosophila melanogaster GN=RpL10 PE=4 SV=1	0	Both	known285	low	Both	0.459074	1.40016	0	1	Ribosomal_L16	1	1	1	1	1	1	1	1	0	0	1	1	1	0	9.88	1	NA	6	3	15	4	3	9	8.15845	9.43697	8.15302	9.50118	10.5668	8.93971	7.25537	7.75269	7.24993	7.90033	9.66373	8.03663
927	O02195	Eukaryotic translation initiation factor 3 subunit I	Trip1	>sp|O02195|EIF3I_DROME Eukaryotic translation initiation factor 3 subunit I OS=Drosophila melanogaster GN=Trip1 PE=1 SV=1	0	Both	known285	low	Both	0.0283549	0.0502154	1	0	NA	NA	1	1	1	0	1	0	0	0	0	1	1	1	0	5.15	0	NA	2	1	18	9	0	17	6.43059	7.54891		8.91827	10.0443	9.84496	5.17531	5.66874		7.00805	8.78904	8.58968
946	O18404;D5A7S2	3-hydroxyacyl-CoA dehydrogenase type-2	scu	>sp|O18404|HCD2_DROME 3-hydroxyacyl-CoA dehydrogenase type-2 OS=Drosophila melanogaster GN=scu PE=1 SV=1	0	Both	Rel_Homo_92	low	Both	0.0349022	0.15028	0	0	NA	NA	0	0	1	1	0	0	1	1	0	0	0	0	0	9.12	0	NA	2	1	15	10	1	14	5.98074	8.30168	7.2801	10.2532	10.6445	10.6058	4.8668	6.50051	6.16616	8.38627	9.53058	9.49184
954	O44434;Q9W2D0;Q9W224;Q9W240		qkr58E-3	>tr|O44434|O44434_DROME QKR58E-3 OS=Drosophila melanogaster GN=qkr58E-3 PE=2 SV=1	0	Both	known285	high	Both	34.1438	28.7453	1	1	KH_1	1	1	1	1	1	1	1	1	1	1	0	0	1	0	9.04	0	NA	2	0	2	10	0	3		8.24244		9.77843	7.59974	7.88423		6.30486		7.80505	6.34447	6.62895
967	O46102;Q7KW16		CG11418-RA	>tr|O46102|O46102_DROME CG11418, isoform A OS=Drosophila melanogaster GN=fs(1)N PE=2 SV=2	0	Both	known285	medium	365nm (X490) unique	6.12789	YW whole not available	0	1	PAP_assoc	1	1	1	0	1	0	1	1	1	1	0	0	0	0	8.64	0	NA	2	0	2	12	5	0		6.9747	7.94322	9.59345	7.18296			4.93493	6.48083	7.42653	5.72055
971	O61305;Q5LK13;L7EEU0;L7EFC0;Q5LK12;L7EGI4;A8Y564	DEAD-box helicase Dbp80	Dbp80	>sp|O61305|DDX19_DROME DEAD-box helicase Dbp80 OS=Drosophila melanogaster GN=Dbp80 PE=1 SV=1;>tr|Q5LK13|Q5LK13_DROME Dead box protein 80, isoform B OS=Drosophila melanogaster GN=Dbp80 PE=4 SV=1;>tr|L7EEU0|L7EEU0_DROME Dead box protein 80, isoform E OS=Dros	0	Both	known285	medium	Both	0.414243	5.01616	1	1	DEAD	1	1	1	1	1	1	0	0	1	0	0	1	1	0	6.34	0	NA	3	0	16	14	0	9		8.05928		9.84322	9.3478	8.70242		6.0304		7.7586	7.98607	7.3407
982	O62602		lic	>tr|O62602|O62602_DROME Licorne OS=Drosophila melanogaster GN=lic PE=2 SV=1	0	Both	new99	low	Both	0.722002	0.368037	0	0	NA	NA	0	0	0	0	0	0	0	0	0	0	0	0	0	5.95	0	NA	5	5	22	10	1	18	7.55859	8.75924	6.2536	9.23196	9.74854	9.27056	6.12723	6.6028	4.82223	7.12261	8.31719	7.83919
984	O62619-2;O62619	Pyruvate kinase	PyK	>sp|O62619-2|KPYK_DROME Isoform B of Pyruvate kinase OS=Drosophila melanogaster GN=PyK;>sp|O62619|KPYK_DROME Pyruvate kinase OS=Drosophila melanogaster GN=PyK PE=2 SV=2	0	Both	Rel_Homo_92	low	Both	0.395094	0.31991	0	0	NA	NA	0	0	0	1	1	1	0	1	1	0	1	1	0	7.13	0	NA	15	12	38	23	12	35	8.76625	9.95168	8.44308	10.541	11.1041	10.5443	7.31909	7.68073	6.99592	8.31971	9.65695	9.09715
985	O62621	Coatomer subunit beta	betaCop	>sp|O62621|COPB2_DROME Coatomer subunit beta OS=Drosophila melanogaster GN=betaCop PE=2 SV=2	0	Both	new99	low	Both	0.0900514	0.527244	0	0	NA	NA	0	0	0	0	1	0	0	0	0	0	1	1	0	5.11	0	NA	2	2	29	12	1	20	6.80787	7.92498	6.0545	9.20505	9.8874	9.08952	5.17441	5.63548	4.42103	6.89557	8.25392	7.45603
987	O76324	Discs overgrown protein kinase	dco	>sp|O76324|DCO_DROME Discs overgrown protein kinase OS=Drosophila melanogaster GN=dco PE=1 SV=2	0	Both	Rel_Homo_92	medium	Both	0.776654	12.2949	0	0	NA	NA	0	0	0	1	1	0	1	0	0	0	1	1	0	9.54	0	NA	3	0	6	10	0	2		7.96926		9.61831	8.99225	8.10469		6.07911		7.6815	7.76181	6.87425
1001	O76912		EG:95B7.9	>tr|O76912|O76912_DROME CG2701 OS=Drosophila melanogaster GN=crm PE=2 SV=1	0	Both	new99	medium	Both	12.7097	5.80792	0	0	NA	NA	0	0	0	0	0	0	0	0	0	0	0	0	0	4.82	0	yes	2	0	3	3	0	2		8.32115		8.48003	8.10113	7.37574		6.18517		6.41012	6.65396	5.92857
1002	O76922;O76922-2		aub	>sp|O76922|AUB_DROME Protein aubergine OS=Drosophila melanogaster GN=aub PE=1 SV=1;>sp|O76922-2|AUB_DROME Isoform C of Protein aubergine OS=Drosophila melanogaster GN=aub	0	Both	known285	high	Both	11.1638	485.85	1	1	PAZ;Piwi	1;1	1	0	1	0	0	0	0	0	0	0	0	0	0	9.36	0	no	16	7	30	45	6	3	7.78442	9.84194	7.55925	11.1617	9.55235	7.93793	6.03623	7.27905	5.81107	8.59377	7.80417	6.18974
1012	O77410	Eukaryotic translation initiation factor 3 subunit E	eIF3-S6	>sp|O77410|EIF3E_DROME Eukaryotic translation initiation factor 3 subunit E OS=Drosophila melanogaster GN=eIF3-S6 PE=2 SV=1	0	Both	known285	medium	Both	1.11727	8.72467	1	1	eIF3_N	1	1	1	1	1	0	0	1	1	1	1	0	0	0	6.35	0	NA	8	8	25	23	2	16	8.01841	9.34469	6.72555	10.4703	10.0959	9.04313	6.57125	7.12398	5.27839	8.25426	8.64875	7.59598
1017	O77477			>tr|O77477|O77477_DROME CG4882 OS=Drosophila melanogaster GN=CG4882 PE=2 SV=1	0	Both	known285	low	Both	0.36584	1.4319	0	1	MRP.S27	1	1	0	0	0	0	0	0	0	0	0	0	0	0	8.67	0	maybe	2	1	11	16	0	14	6.18792	7.91792		10.1034	9.27212	9.48796	4.82618	5.90075		7.99967	7.91038	8.12623
1058	P04052	DNA-directed RNA polymerase II subunit RPB1	RpII215	>sp|P04052|RPB1_DROME DNA-directed RNA polymerase II subunit RPB1 OS=Drosophila melanogaster GN=RpII215 PE=3 SV=4	0	Both	known285	medium	Both	1.97041	5.21207	0	1	RNA_pol_Rpb1_1;RNA_pol_Rpb1_2;RNA_pol_Rpb1_3;RNA_pol_Rpb1_4;RNA_pol_Rpb1_5;RNA_pol_Rpb1_6;RNA_pol_Rpb1_7	1;1;1;1;1;1;1	1	1	1	1	1	1	1	1	0	1	1	1	0	7.99	0	no	3	3	27	10	2	4	6.9582	8.46564	6.76145	9.06	9.04324	7.9601	5.00393	5.81062	4.80721	6.44041	7.08899	6.00587
1059	P04359	60S ribosomal protein L32	RpL32	>sp|P04359|RL32_DROME 60S ribosomal protein L32 OS=Drosophila melanogaster GN=RpL32 PE=1 SV=3	0	Both	known285	low	Both	0.222164	0.0599618	0	1	Ribosomal_L32e	1	1	1	1	1	1	1	0	0	1	0	1	1	0	11.4	1	NA	4	4	12	3	1	10	7.96644	9.11137	6.89611	9.04189	10.5834	9.88248	7.18828	7.57898	6.11797	7.59972	9.80524	9.10432
1063	P05990;P05990-2	CAD protein;Glutamine-dependent carbamoyl-phosphate synthase;Aspartate carbamoyltransferase;Dihydroorotase	r	>sp|P05990|PYR1_DROME CAD protein OS=Drosophila melanogaster GN=r PE=1 SV=3	0	Both	Rel_Homo_92	medium	Both	0.495928	3.96741	0	0	NA	NA	0	0	1	0	1	0	0	0	0	0	1	0	0	6.19	0	no	9	5	75	12	1	7	7.67424	9.05049	6.20033	9.13726	10.1788	8.1502	5.64081	6.26788	4.16693	6.43281	8.14538	6.11677
1064	P06606	Tubulin alpha-4 chain	alphaTub67C	>sp|P06606|TBA4_DROME Tubulin alpha-4 chain OS=Drosophila melanogaster GN=alphaTub67C PE=3 SV=1	0	Both	Rel_Homo_92	low	Both	0.83736	0.327567	0	0	NA	NA	0	0	1	0	1	0	0	0	0	0	1	0	0	5.11	0	NA	10	3	23	12	3	24	8.15567	9.83994	7.45291	10.1352	10.6754	10.158	6.85465	7.72435	6.15186	8.0898	9.37436	8.85697
1079	P07909-3;P07909-4;A4V3J6;P07909;A4V3J5	Heterogeneous nuclear ribonucleoprotein A1	Hrb98DE	>sp|P07909-3|ROA1_DROME Isoform E of Heterogeneous nuclear ribonucleoprotein A1 OS=Drosophila melanogaster GN=Hrb98DE;>sp|P07909-4|ROA1_DROME Isoform D of Heterogeneous nuclear ribonucleoprotein A1 OS=Drosophila melanogaster GN=Hrb98DE;>tr|A4V3J6|A4V3J6_DR	0	Both	known285	high	Both	27.9205	36.4797	1	1	RRM_1	2	1	1	1	1	1	1	1	1	1	0	1	1	1	9.01	0	NA	9	3	7	21	9	9	8.64581	9.95788	8.81089	11.8016	9.26057	9.65532	7.44168	7.92944	7.60677	9.73078	8.05645	8.4512
1080	P08266	DNA-directed RNA polymerase II subunit RPB2	RpII140	>sp|P08266|RPB2_DROME DNA-directed RNA polymerase II subunit RPB2 OS=Drosophila melanogaster GN=RpII140 PE=2 SV=2	0	Both	known285	medium	Both	1.07273	9.55568	0	1	RNA_pol_Rpb2_1;RNA_pol_Rpb2_2;RNA_pol_Rpb2_3;RNA_pol_Rpb2_4;RNA_pol_Rpb2_5;RNA_pol_Rpb2_6;RNA_pol_Rpb2_7	1;1;1;1;1;1;1	1	1	1	1	1	1	1	1	0	1	1	1	1	6.61	0	no	2	0	22	8	0	1		8.21216		8.9728	9.07482	7.61607		5.76151		6.543	7.30395	5.84521
1089	P09180	60S ribosomal protein L4	RpL4	>sp|P09180|RL4_DROME 60S ribosomal protein L4 OS=Drosophila melanogaster GN=RpL4 PE=1 SV=2	0	Both	known285	low	Both	0.190895	0.69013	0	1	Ribosomal_L4	1	1	1	1	1	1	1	1	0	0	1	1	1	0	11.48	1	NA	6	5	29	18	6	22	8.21288	9.56642	7.59761	10.269	11.0667	9.95836	6.87047	7.4321	6.25518	8.1724	9.72423	8.61594
1105	P12982	Serine/threonine-protein phosphatase alpha-2 isoform	Pp1-87B	>sp|P12982|PP12_DROME Serine/threonine-protein phosphatase alpha-2 isoform OS=Drosophila melanogaster GN=Pp1-87B PE=1 SV=1	0	Both	Rel_Homo_92	low	Both	0.285675	0.0719369	0	0	NA	NA	0	0	0	1	1	0	1	0	0	1	1	0	0	5.39	0	NA	3	4	16	8	2	14	7.26335	8.54105	7.74557	8.88384	9.95107	9.65695	6.05922	6.6299	6.54145	7.02731	8.74695	8.45283
1106	P13060;P13060-3	Elongation factor 2	Ef2b	>sp|P13060|EF2_DROME Elongation factor 2 OS=Drosophila melanogaster GN=EF2 PE=1 SV=4;>sp|P13060-3|EF2_DROME Isoform B of Elongation factor 2 OS=Drosophila melanogaster GN=EF2	0	Both	known285	medium	Both	0.876536	2.92244	1	1	EFG_IV;GTP_EFTU;GTP_EFTU_D2	1;1;1	1	1	1	0	1	0	0	0	0	0	1	1	0	6.18	0	NA	32	27	70	52	25	58	9.21437	10.675	9.14423	11.5207	11.4214	10.4914	7.55161	8.12853	7.48149	9.01191	9.75868	8.82863
1108	P13469	DNA-binding protein modulo	mod	>sp|P13469|MODU_DROME DNA-binding protein modulo OS=Drosophila melanogaster GN=mod PE=1 SV=2	0	Both	known285	high	Both	38.3032	49.7527	1	1	RRM_1	4	1	0	1	0	0	0	0	0	0	0	0	0	0	5.32	0	yes	19	2	17	34	5	17	6.81554	10.2753	7.64104	11.7903	9.41441	9.51008	5.40056	8.00975	6.22606	9.50944	7.99944	8.0951
1115	P15357	Ubiquitin-40S ribosomal protein S27a;Ubiquitin;40S ribosomal protein S27a	RpS27A	>sp|P15357|RS27A_DROME Ubiquitin-40S ribosomal protein S27a OS=Drosophila melanogaster GN=RpS27A PE=1 SV=2	0	Both	known285	medium	Both	15.8217	2.59479	0	1	Ribosomal_S27	1	1	1	1	1	1	1	1	0	0	0	0	1	0	10.02	1	no	6	5	8	11	8	8	9.88472	11.3842	10.7449	12.0111	10.8155	10.9974	9.10656	9.66367	9.96674	10.3508	10.0373	10.2192
1122	P17704	40S ribosomal protein S17	RpS17	>sp|P17704|RS17_DROME 40S ribosomal protein S17 OS=Drosophila melanogaster GN=RpS17 PE=1 SV=2	0	Both	known285	low	Both	1.01346	0.413589	0	1	Ribosomal_S17e	1	1	1	1	1	1	1	0	0	0	1	1	1	0	9.94	1	NA	9	5	11	11	3	10	8.31152	9.80619	7.33306	10.727	10.5616	10.6052	7.53337	8.2163	6.55491	9.1611	9.78342	9.827
1136	P19109;P19109-3;E1JJ68;P19109-4;P19109-2	ATP-dependent RNA helicase p62	Rm62	>sp|P19109|DDX17_DROME ATP-dependent RNA helicase p62 OS=Drosophila melanogaster GN=Rm62 PE=1 SV=3;>sp|P19109-3|DDX17_DROME Isoform D of ATP-dependent RNA helicase p62 OS=Drosophila melanogaster GN=Rm62;>tr|E1JJ68|E1JJ68_DROME Rm62, isoform H OS=Drosophila	0	Both	known285	high	Both	61.7977	98.0906	1	1	DEAD	1	1	1	1	1	1	1	1	1	1	0	1	1	0	9.63	0	NA	31	11	26	46	32	23	8.44989	11.2421	9.4685	12.3324	10.0934	9.71753	6.78713	8.6487	7.80575	9.76392	8.43066	8.05477
1146	P20480	Protein claret segregational	ncd	>sp|P20480|NCD_DROME Protein claret segregational OS=Drosophila melanogaster GN=ncd PE=1 SV=1	0	Both	Rel_Homo_92	medium	Both	0.746599	3.61316	0	0	NA	NA	0	0	1	0	0	0	0	0	0	0	0	0	0	9.28	0	NA	3	1	17	11	1	8	6.32062	8.05849	6.65867	9.32892	9.09124	8.36842	4.76433	5.8351	5.10237	7.08753	7.53494	6.81212
1148	P21187	Polyadenylate-binding protein	pAbp	>sp|P21187|PABP_DROME Polyadenylate-binding protein OS=Drosophila melanogaster GN=pAbp PE=1 SV=3	0	Both	known285	high	Both	14.288	34.8937	1	1	RRM_1;PABP	4;1	1	1	1	1	1	1	1	1	1	0	1	1	1	9.33	0	NA	30	22	32	51	32	27	9.39728	11.3043	9.66819	12.8805	10.7865	10.6743	7.92015	8.8914	8.19106	10.4575	9.30935	9.1972
1155	P22769;Q24178	Proteasome subunit alpha type-7-1	Pros28.1	>sp|P22769|PSA71_DROME Proteasome subunit alpha type-7-1 OS=Drosophila melanogaster GN=Prosalpha4 PE=1 SV=2	0	Both	new99	low	Both	0.034112	0.00790217	0	0	NA	NA	0	0	0	0	1	0	0	0	0	1	1	0	0	8.24	0	NA	2	1	11	3	0	10	6.62777	8.03536		8.59433	10.4102	10.3479	5.58636	6.32881		6.92179	9.36883	9.30651
1160	P23128;P23128-2	Putative ATP-dependent RNA helicase me31b	me31B	>sp|P23128|DDX6_DROME Putative ATP-dependent RNA helicase me31b OS=Drosophila melanogaster GN=me31B PE=1 SV=3;>sp|P23128-2|DDX6_DROME Isoform B of Putative ATP-dependent RNA helicase me31b OS=Drosophila melanogaster GN=me31B	0	Both	known285	high	Both	10.276	44.5391	1	1	DEAD	1	1	1	1	1	1	1	1	1	1	1	1	1	1	7.56	0	NA	32	25	38	49	30	31	9.47996	11.4185	9.75094	12.7084	11.0343	10.4088	8.06498	9.05827	8.33596	10.3601	9.61938	8.99385
1165	P23572	Cyclin-dependent kinase 1	cdc2	>sp|P23572|CDK1_DROME Cyclin-dependent kinase 1 OS=Drosophila melanogaster GN=cdc2 PE=1 SV=1	0	Both	Rel_Homo_92	low	Both	0.192345	0.0247051	0	0	NA	NA	0	0	1	0	1	0	0	0	0	1	1	0	0	6.41	0	no	5	0	21	6	0	18		8.56626		8.56815	10.146	9.8286		6.55612		6.63788	8.84497	8.52757
1171	P24785;P24785-3;P24785-2;A1Z6I8	Dosage compensation regulator	mle	>sp|P24785|MLE_DROME Dosage compensation regulator OS=Drosophila melanogaster GN=mle PE=2 SV=2;>sp|P24785-3|MLE_DROME Isoform B of Dosage compensation regulator OS=Drosophila melanogaster GN=mle	0	Both	known285	high	Both	124.596	33473.3	1	1	DEAD;dsrm;HA2	1;1;1	1	1	1	1	1	1	1	1	1	1	1	1	1	6.89	0	NA	30	3	11	59	28	1	7.16164	9.9333	8.57286	11.3476	8.58846	6.272	5.35545	7.30486	6.76667	8.70806	6.78228	4.46583
1176	P25158-2;P25158	Maternal effect protein oskar	osk	>sp|P25158-2|OSKA_DROME Isoform C of Maternal effect protein oskar OS=Drosophila melanogaster GN=osk;>sp|P25158|OSKA_DROME Maternal effect protein oskar OS=Drosophila melanogaster GN=osk PE=1 SV=1	0	Both	Rel_Homo_92	high	365nm (X490) unique	39.8019	YW whole not available	0	0	NA	NA	0	0	1	0	0	0	0	0	0	0	0	0	0	9.34	0	NA	6	3	4	15	1	0	7.37394	8.97617	6.29354	10.3625	8.20615		6.07291	6.93209	4.99251	8.30042	6.90511
1181	P25822;P25822-2;P25822-3	Maternal protein pumilio	pum	>sp|P25822|PUM_DROME Maternal protein pumilio OS=Drosophila melanogaster GN=pum PE=1 SV=2;>sp|P25822-2|PUM_DROME Isoform B of Maternal protein pumilio OS=Drosophila melanogaster GN=pum;>sp|P25822-3|PUM_DROME Isoform E of Maternal protein pumilio OS=Drosoph	positive control	Both	known285	high	Both	31.1495	524.145	1	1	PUF	8	1	1	1	1	1	1	1	1	1	0	1	1	1	7.34	0	no	11	3	12	26	8	7	7.39596	9.61597	8.09947	11.9303	8.89944	8.61714	5.86448	7.2885	6.568	9.52263	7.36797	7.08565
1182	P25823	Maternal protein tudor	tud	>sp|P25823|TUD_DROME Maternal protein tudor OS=Drosophila melanogaster GN=tud PE=1 SV=2	0	Both	known285	high	Both	16.4847	103.835	0	1	TUDOR	9	1	1	1	0	0	0	0	0	0	0	0	0	0	6.06	0	NA	23	14	38	65	41	8	8.12421	9.83594	8.63951	10.6921	9.3776	8.17301	5.98748	6.88503	6.50278	7.77018	7.24087	6.03631
1187	P26019	DNA polymerase alpha catalytic subunit	DNApol-alpha180	>sp|P26019|DPOLA_DROME DNA polymerase alpha catalytic subunit OS=Drosophila melanogaster GN=DNApol-alpha180 PE=1 SV=2	0	Both	Rel_Homo_92	low	Both	0.488182	0.353801	0	0	NA	NA	0	0	1	0	0	0	0	0	0	0	0	0	0	8.28	0	NA	3	3	32	5	1	4	6.94798	8.09552	6.23104	8.81989	9.30972	8.90586	5.06718	5.54455	4.35023	6.29135	7.4289	7.02506
1189	P26686-3;P26686-2;P26686-5;P26686;P26686-7;P26686-4;P26686-6;P26686-9;P26686-8	Serine-arginine protein 55	B52	>sp|P26686-3|SRR55_DROME Isoform B of Serine-arginine protein 55 OS=Drosophila melanogaster GN=B52;>sp|P26686-2|SRR55_DROME Isoform A of Serine-arginine protein 55 OS=Drosophila melanogaster GN=B52;>sp|P26686-5|SRR55_DROME Isoform E of Serine-arginine prot	0	Both	known285	high	Both	24.5722	2.77638	1	1	RRM_1	2	1	1	1	1	1	1	1	1	1	1	1	1	1	11.37	0	NA	10	7	14	19	10	15	8.31559	10.5357	8.65816	11.7214	9.84604	10.6996	7.23641	8.58438	7.57898	9.7814	8.76686	9.6204
1195	P29327;Q95TP9;P29327-2	40S ribosomal protein S6	RpS6	>sp|P29327|RS6_DROME 40S ribosomal protein S6 OS=Drosophila melanogaster GN=RpS6 PE=1 SV=1;>tr|Q95TP9|Q95TP9_DROME 40S ribosomal protein S6 OS=Drosophila melanogaster GN=RpS6 PE=2 SV=1;>sp|P29327-2|RS6_DROME Isoform B of 40S ribosomal protein S6 OS=Drosoph	0	Both	known285	medium	Both	0.567147	4.22346	0	1	Ribosomal_S6e	1	1	1	1	1	1	1	0	1	1	1	1	1	0	10.75	1	NA	4	4	11	7	2	6	8.39009	9.60152	7.47897	10.0623	10.6259	8.98012	7.39009	7.80671	6.47897	8.32331	9.62594	7.98012
1198	P29613;P29613-1	Triosephosphate isomerase	Tpi	>sp|P29613|TPIS_DROME Triosephosphate isomerase OS=Drosophila melanogaster GN=Tpi PE=1 SV=3;>sp|P29613-1|TPIS_DROME Isoform A of Triosephosphate isomerase OS=Drosophila melanogaster GN=Tpi	0	Both	Rel_Homo_92	low	Both	0.0610123	0.00401272	0	0	NA	NA	0	0	0	0	1	0	0	0	1	1	1	1	0	5.74	0	NA	3	2	17	5	3	18	7.19307	8.6261	7.72755	8.98508	10.6995	11.0042	5.98895	6.70791	6.52342	7.1211	9.49542	9.80013
1204	P29845	Heat shock 70 kDa protein cognate 5	Hsc70-5	>sp|P29845|HSP7E_DROME Heat shock 70 kDa protein cognate 5 OS=Drosophila melanogaster GN=Hsc70-5 PE=1 SV=2	0	Both	Rel_Homo_92	low	Both	0.0940672	0.00385215	0	0	NA	NA	0	0	0	1	0	1	1	0	0	1	0	0	0	6.02	0	NA	3	1	35	2	0	36	7.05146	8.48483		8.0527	10.3819	10.1581	5.46039	6.1914		5.87026	8.79088	8.56703
1205	P32100	60S ribosomal protein L7	RpL7	>sp|P32100|RL7_DROME 60S ribosomal protein L7 OS=Drosophila melanogaster GN=RpL7 PE=1 SV=2	0	Both	known285	low	Both	0.261709	0.720579	1	1	Ribosomal_L30;Ribosomal_L30_N	1;1	1	1	1	1	1	1	1	1	1	1	1	1	0	10.89	1	no	5	3	21	12	2	13	7.85054	9.34692	6.96393	9.99484	10.7283	9.68561	6.7366	7.45924	5.84999	8.14687	9.61435	8.57166
1206	P32234	GTP-binding protein 128up	128up	>sp|P32234|128UP_DROME GTP-binding protein 128up OS=Drosophila melanogaster GN=128up PE=2 SV=2	0	Both	known285	low	Both	0.866856	0.8915	0	1	MMR_HSR1	1	1	1	1	0	0	0	0	0	0	0	0	0	0	8.78	0	NA	5	1	15	10	0	13	6.95875	8.72234		9.44119	9.63529	9.08019	5.61633	6.6579		7.40541	8.29288	7.73776
1209	P34739	Transcription termination factor 2	lds	>sp|P34739|TTF2_DROME Transcription termination factor 2 OS=Drosophila melanogaster GN=lds PE=1 SV=2	0	Both	Rel_Homo_92	medium	Both	0.423879	2.482	0	0	NA	NA	0	1	1	0	0	0	0	0	0	0	0	0	0	6.22	0	no	2	2	27	27	4	9	7.02812	8.08016	7.16811	9.95359	9.35696	9.11029	5.27996	5.66309	5.41992	7.47443	7.60877	7.36211
1211	P35381	ATP synthase subunit alpha, mitochondrial	blw	>sp|P35381|ATPA_DROME ATP synthase subunit alpha, mitochondrial OS=Drosophila melanogaster GN=blw PE=1 SV=2	0	Both	Rel_Homo_92	low	Both	0.0629433	0.0442792	0	0	NA	NA	0	0	1	1	1	1	0	0	0	1	1	0	0	8.22	0	NA	7	7	33	17	8	31	7.95289	9.1917	8.48534	10.2796	11.2048	11.161	6.42141	6.89934	6.95386	7.99323	9.67332	9.6295
1213	P35600	Replication factor C subunit 1	Gnf1	>sp|P35600|RFC1_DROME Replication factor C subunit 1 OS=Drosophila melanogaster GN=Gnf1 PE=1 SV=2	0	Both	Rel_Homo_92	low	Both	0.277987	0.679846	0	0	NA	NA	0	0	1	0	1	0	0	0	0	0	0	1	0	9.34	0	NA	4	2	34	15	0	32	6.49337	8.24456		9.82673	9.69098	9.55514	4.77737	5.84608		7.38908	7.97499	7.83914
1214	P35875;P35875-2;P35875-3	Poly [ADP-ribose] polymerase	Parp	>sp|P35875|PARP_DROME Poly [ADP-ribose] polymerase OS=Drosophila melanogaster GN=Parp PE=2 SV=1;>sp|P35875-2|PARP_DROME Isoform I of Poly [ADP-ribose] polymerase OS=Drosophila melanogaster GN=Parp	0	Both	known285	high	Both	4.77029	21.1105	0	1	PARP	1	1	1	1	1	0	1	1	0	0	0	0	0	0	8.77	0	maybe	3	0	12	21	0	3		8.27492		9.81744	8.48431	8.05442		5.84957		7.35608	6.74395	6.31406
1215	P36241	60S ribosomal protein L19	RpL19	>sp|P36241|RL19_DROME 60S ribosomal protein L19 OS=Drosophila melanogaster GN=RpL19 PE=1 SV=2	0	Both	known285	low	Both	0.184741	0.153939	0	1	Ribosomal_L19e	1	1	1	1	1	1	1	0	1	1	1	1	0	0	11	1	NA	6	4	15	2	1	9	7.88694	9.03078	6.46988	8.63655	10.5896	9.0974	6.98384	7.38012	5.56679	7.0992	9.68648	8.19432
1217	P36872-2			>sp|P36872-2|2ABA_DROME Isoform B of Protein phosphatase PP2A 55 kDa regulatory subunit OS=Drosophila melanogaster GN=tws	0	Both	new99	medium	Both	0.200127	2.11901	0	0	NA	NA	0	0	0	0	0	0	0	0	0	0	0	0	0	6.66	0	NA	2	3	18	7	4	6	7.27499	8.34444	7.96068	9.26855	9.92532	8.54423	5.91326	6.29197	6.59895	7.22616	8.56359	7.1825
1228	P40796	La protein homolog	La	>sp|P40796|LA_DROME La protein homolog OS=Drosophila melanogaster GN=La PE=1 SV=2	0	Both	known285	high	Both	15.2318	7.58193	1	1	La;RRM_3;RRM_6	1;1;1	1	1	1	1	1	1	1	1	1	0	1	1	0	7.07	0	no	17	9	24	34	8	26	8.44596	10.3298	8.00587	11.9691	9.86491	10.4929	7.14492	8.17371	6.70485	9.78912	8.56388	9.19181
1231	P41042	40S ribosomal protein S4	RpS4	>sp|P41042|RS4_DROME 40S ribosomal protein S4 OS=Drosophila melanogaster GN=RpS4 PE=1 SV=2	0	Both	known285	medium	Both	0.575551	1.53958	1	1	KOW;Ribosomal_S4e;RS4NT;S4	1;1;1;1	1	1	1	1	1	1	1	0	1	1	1	1	0	10.19	1	NA	10	6	20	18	6	20	8.26795	9.89886	7.7098	11.3633	10.8923	10.6238	7.09188	7.90335	6.5337	9.35265	9.71619	9.44772
1234	P41094	40S ribosomal protein S18	RpS18	>sp|P41094|RS18_DROME 40S ribosomal protein S18 OS=Drosophila melanogaster GN=RpS18 PE=1 SV=1	0	Both	known285	low	Both	0.161732	1.6434	1	1	Ribosomal_S13	1	1	1	1	1	1	0	1	0	1	0	0	1	0	10.48	1	NA	4	1	12	19	1	12	7.69445	9.13191	6.86294	11.3717	10.7401	10.6034	6.7402	7.42172	5.90869	9.58238	9.78585	9.64911
1235	P41374	Eukaryotic translation initiation factor 2 subunit 1	eIF-2alpha	>sp|P41374|IF2A_DROME Eukaryotic translation initiation factor 2 subunit 1 OS=Drosophila melanogaster GN=eIF-2alpha PE=2 SV=1	0	Both	known285	medium	Both	1.85317	1.34752	1	1	EIF_2_alpha;S1	1;1	1	1	1	1	1	1	1	1	1	0	1	1	0	4.87	0	NA	7	3	18	21	2	19	7.82513	9.55655	6.93948	10.5666	10.0705	9.94358	6.54638	7.48671	5.66073	8.51188	8.79173	8.66482
1252	P46223	60S ribosomal protein L7a	RpL7A	>sp|P46223|RL7A_DROME 60S ribosomal protein L7a OS=Drosophila melanogaster GN=RpL7A PE=1 SV=2	0	Both	known285	low	Both	0.216514	1.27391	0	1	Ribosomal_L7Ae	1	1	1	1	1	1	1	1	1	0	1	1	1	0	10.72	1	NA	6	4	20	14	7	13	8.00035	9.44189	7.90113	10.1888	10.8977	9.61785	7.00035	7.6603	6.90113	8.44052	9.89774	8.61785
1255	P47938	Thioredoxin-1	dhd	>sp|P47938|THIO1_DROME Thioredoxin-1 OS=Drosophila melanogaster GN=dhd PE=1 SV=1	Validated	Both	new99	medium	Both	1.79829	1.3824	0	0	NA	NA	0	0	0	0	1	0	0	0	0	0	1	1	0	9.45	0	NA	2	2	4	4	3	3	6.72008	7.77304	7.84755	9.08307	8.44769	8.55786	5.817	6.22652	6.94446	7.51292	7.54459	7.65476
1259	P48159	60S ribosomal protein L23	RpL23	>sp|P48159|RL23_DROME 60S ribosomal protein L23 OS=Drosophila melanogaster GN=RpL23 PE=1 SV=2	0	Both	known285	low	Both	0.15521	0.112798	0	1	Ribosomal_L14	1	1	1	1	1	1	1	0	1	1	1	1	0	0	10.83	1	NA	4	0	11	4	1	8		8.77172	6.79557	9.43337	10.4276	9.97076		7.09135	5.84133	7.78636	9.47336	9.01653
1265	P48591	Ribonucleoside-diphosphate reductase large subunit	RnrL	>sp|P48591|RIR1_DROME Ribonucleoside-diphosphate reductase large subunit OS=Drosophila melanogaster GN=RnrL PE=1 SV=2	0	Both	Rel_Homo_92	low	Both	0.0665537	0.446887	0	0	NA	NA	0	0	1	0	1	0	0	0	0	1	1	0	0	7.23	0	NA	2	3	40	11	2	22	7.29568	8.40584	7.24294	9.37148	10.4598	9.31553	5.72747	6.14179	5.67474	7.11504	8.89155	7.74732
1270	P48610-3;P48610-2;A8JNP2;P48610;A8JNP1;P48610-4	Arginine kinase	Argk	>sp|P48610-3|KARG_DROME Isoform B of Arginine kinase OS=Drosophila melanogaster GN=Argk;>sp|P48610-2|KARG_DROME Isoform A of Arginine kinase OS=Drosophila melanogaster GN=Argk;>tr|A8JNP2|A8JNP2_DROME Arginine kinase, isoform E OS=Drosophila melanogaster GN	0	Both	new99	low	Both	0.164901	0.0163788	0	0	NA	NA	0	0	0	0	0	0	0	0	0	0	0	0	0	6.04	0	NA	4	2	26	6	0	26	7.57449	8.69787		9.02541	10.3336	10.4308	6.19429	6.59765		6.98238	8.95335	9.05057
1276	P49735	DNA replication licensing factor Mcm2	Mcm2	>sp|P49735|MCM2_DROME DNA replication licensing factor Mcm2 OS=Drosophila melanogaster GN=Mcm2 PE=1 SV=1	0	Both	new99	low	Both	0.295447	0.00741524	0	0	NA	NA	0	0	0	0	0	0	0	0	0	0	0	0	0	4.98	0	NA	5	1	35	3	0	28	7.28954	8.84696		7.86465	10.217	9.69942	5.6083	6.43335		5.60585	8.5358	8.0182
1287	P52034-3;P52034;P52034-2	6-phosphofructokinase	Pfk	>sp|P52034-3|K6PF_DROME Isoform C of 6-phosphofructokinase OS=Drosophila melanogaster GN=Pfk;>sp|P52034|K6PF_DROME 6-phosphofructokinase OS=Drosophila melanogaster GN=Pfk PE=2 SV=2;>sp|P52034-2|K6PF_DROME Isoform A of 6-phosphofructokinase OS=Drosophila me	0	Both	new99	medium	Both	0.0716657	3.68589	0	0	NA	NA	0	0	0	0	1	0	0	0	0	0	1	1	0	6.41	0	NA	2	0	20	4	0	6		7.56653		8.58423	9.65776	7.66974		5.39609		6.40975	8.11371	6.12568
1288	P52295	Importin subunit alpha	Pen	>sp|P52295|IMA_DROME Importin subunit alpha OS=Drosophila melanogaster GN=Pen PE=1 SV=2	0	Both	Rel_Homo_92	low	Both	0.460856	0.301861	0	0	NA	NA	0	0	0	1	1	0	1	1	1	0	0	1	0	5.2	0	NA	9	8	36	22	5	35	8.5219	9.63529	8.04848	10.5732	10.7471	10.5994	7.14167	7.45747	6.66827	8.41647	9.36683	9.21914
1289	P52304	Serine/threonine-protein kinase polo	polo	>sp|P52304|POLO_DROME Serine/threonine-protein kinase polo OS=Drosophila melanogaster GN=polo PE=1 SV=2	0	Both	new99	medium	Both	0.848833	4.1919	0	0	NA	NA	0	0	0	0	0	0	0	0	0	0	0	0	0	9.03	0	NA	6	5	29	22	3	19	7.89496	9.09915	7.05392	10.1607	9.99002	9.0746	6.37645	6.82741	5.53542	7.89602	8.47151	7.55609
1302	P54358	DNA polymerase delta catalytic subunit	DNApol-delta	>sp|P54358|DPOD1_DROME DNA polymerase delta catalytic subunit OS=Drosophila melanogaster GN=DNApol-delta PE=2 SV=2	0	Both	Rel_Homo_92	low	Both	0.486014	1.32013	0	0	NA	NA	0	0	1	0	0	0	0	0	0	0	0	0	0	6.5	0	NA	6	2	41	8	2	6	6.90712	8.55835	6.73774	8.93968	9.73617	8.44503	5.1437	6.08647	4.97431	6.51975	7.97274	6.6816
1304	P54362;M9NH10;M9PHJ5;M9PJM7	AP-3 complex subunit delta	g	>sp|P54362|AP3D_DROME AP-3 complex subunit delta OS=Drosophila melanogaster GN=g PE=1 SV=4;>tr|M9NH10|M9NH10_DROME Garnet, isoform C OS=Drosophila melanogaster GN=g PE=4 SV=1;>tr|M9PHJ5|M9PHJ5_DROME Garnet, isoform D OS=Drosophila melanogaster GN=g PE=4 SV	0	Both	Rel_Homo_92	medium	Both	2.01269	14.8928	0	0	NA	NA	0	0	1	0	1	0	0	0	0	0	0	1	0	6.9	0	NA	2	0	13	4	3	1		8.12967	6.98831	8.86466	8.72585	7.32313		5.91264	5.44425	6.66957	7.18179	5.77906
1313	P55824;P55824-3	Probable ubiquitin carboxyl-terminal hydrolase FAF	faf	>sp|P55824|FAF_DROME Probable ubiquitin carboxyl-terminal hydrolase FAF OS=Drosophila melanogaster GN=faf PE=1 SV=2;>sp|P55824-3|FAF_DROME Isoform 3 of Probable ubiquitin carboxyl-terminal hydrolase FAF OS=Drosophila melanogaster GN=faf	0	Both	new99	medium	Both	0.498658	3.7385	0	0	NA	NA	0	0	0	0	0	0	0	0	0	0	0	0	0	5.7	0	NA	9	8	69	28	22	2	7.5466	8.72122	8.1672	9.70046	9.87441	8.69785	5.41951	5.87218	6.04009	6.86097	7.7473	6.57074
1314	P55828	40S ribosomal protein S20	RpS20	>sp|P55828|RS20_DROME 40S ribosomal protein S20 OS=Drosophila melanogaster GN=RpS20 PE=1 SV=1	0	Both	known285	medium	Both	1.49037	0.780798	1	1	Ribosomal_S10	1	1	1	1	1	1	1	1	1	1	0	1	1	1	10.33	1	NA	4	2	9	7	4	7	8.53771	9.83187	8.3974	10.636	10.4176	10.2449	7.75955	8.23982	7.61924	9.07679	9.63946	9.46672
1315	P55830;P55830-2	40S ribosomal protein S3a	RpS3A	>sp|P55830|RS3A_DROME 40S ribosomal protein S3a OS=Drosophila melanogaster GN=RpS3A PE=1 SV=4;>sp|P55830-2|RS3A_DROME Isoform B of 40S ribosomal protein S3a OS=Drosophila melanogaster GN=RpS3A	0	Both	known285	medium	Both	2.14721	2.07729	0	1	Ribosomal_S3Ae	1	1	1	1	1	1	1	1	1	1	1	1	1	0	9.63	1	NA	15	11	24	20	9	21	9.10514	10.475	8.26851	11.4372	10.8489	10.5623	7.90102	8.40372	7.06438	9.39319	9.64477	9.35816
1317	P55935;Q95RG1	40S ribosomal protein S9	RpS9	>sp|P55935|RS9_DROME 40S ribosomal protein S9 OS=Drosophila melanogaster GN=RpS9 PE=1 SV=2;>tr|Q95RG1|Q95RG1_DROME LD32106p OS=Drosophila melanogaster GN=RpS9 PE=2 SV=1	0	Both	known285	medium	Both	0.762687	3.34601	1	1	Ribosomal_S4;S4	1;1	1	1	1	1	1	1	0	1	0	1	1	1	0	10.61	1	NA	13	13	18	23	13	20	8.85846	9.97279	9.03945	12.0748	10.8378	10.946	7.77928	8.06807	7.96028	10.1089	9.75865	9.86685
1334	P91622;A8DY78	[Pyruvate dehydrogenase [lipoamide]] kinase, mitochondrial	Pdk	>sp|P91622|PDK_DROME [Pyruvate dehydrogenase (acetyl-transferring)] kinase, mitochondrial OS=Drosophila melanogaster GN=Pdk PE=2 SV=2;>tr|A8DY78|A8DY78_DROME Pyruvate dehydrogenase kinase, isoform B OS=Drosophila melanogaster GN=Pdk PE=4 SV=1	0	Both	new99	medium	Both	0.507599	1.63143	0	0	NA	NA	0	0	0	0	0	0	0	0	0	0	0	0	0	6.67	0	NA	2	1	13	3	0	4	6.08696	7.50965		8.49111	8.75541	7.93745	4.72524	5.52627		6.50581	7.39368	6.57572
1335	P91632;M9NGB9		mub	>tr|P91632|P91632_DROME Mushroom-body expressed, isoform A OS=Drosophila melanogaster GN=mub PE=2 SV=1;>tr|M9NGB9|M9NGB9_DROME Mushroom-body expressed, isoform H OS=Drosophila melanogaster GN=mub PE=4 SV=1	0	Both	known285	high	Both	9.00243	60.2439	1	1	KH_1	3	1	1	1	1	1	1	1	1	1	0	1	1	1	8.53	0	NA	7	1	11	23	4	7	6.51445	9.50676	8.23937	11.646	9.33836	9.29332	5.23571	7.44103	6.96063	9.512	8.0596	8.01456
1342	P91938-4;P91938-2;P91938-3;P91938	Thioredoxin reductase 1, mitochondrial	Trxr-1	>sp|P91938-4|TRXR1_DROME Isoform D of Thioredoxin reductase 1, mitochondrial OS=Drosophila melanogaster GN=Trxr-1;>sp|P91938-2|TRXR1_DROME Isoform A of Thioredoxin reductase 1, mitochondrial OS=Drosophila melanogaster GN=Trxr-1;>sp|P91938-3|TRXR1_DROME Iso	0	Both	new99	low	Both	0.0310186	0.0450069	0	0	NA	NA	0	0	0	0	1	0	0	0	0	0	1	1	0	6.05	0	NA	3	1	26	10	1	22	7.2828	8.39866	6.76847	9.4728	10.7847	10.4063	5.86782	6.28845	5.35349	7.36216	9.36975	8.99135
1357	Q02427-2;Q02427-1;Q02427	RNA-binding protein 1	Rbp1	>sp|Q02427-2|RBP1_DROME Isoform B of RNA-binding protein 1 OS=Drosophila melanogaster GN=Rbp1;>sp|Q02427-1|RBP1_DROME Isoform A of RNA-binding protein 1 OS=Drosophila melanogaster GN=Rbp1;>sp|Q02427|RBP1_DROME RNA-binding protein 1 OS=Drosophila melanogast	0	Both	known285	medium	Both	2.27313	8.21696	1	1	RRM_1	1	1	0	1	1	1	1	1	1	1	0	1	1	1	10.02	0	NA	4	2	7	7	1	6	7.49415	8.76033	7.12317	10.9653	9.25144	9.52782	6.64905	7.19005	6.27804	9.31496	8.40635	8.68272
1359	Q03043-2;Q03043;Q03043-3;Q03043-4;P32023-2;E1JHR9;P32023;Q9VL34	cGMP-dependent protein kinase, isozyme 2 forms cD4/T1/T3A/T3B;cGMP-dependent protein kinase, isozyme 2 forms cD5/T2	for	>sp|Q03043-2|KGP24_DROME Isoform T3A of cGMP-dependent protein kinase, isozyme 2 forms cD4/T1/T3A/T3B OS=Drosophila melanogaster GN=for;>sp|Q03043|KGP24_DROME cGMP-dependent protein kinase, isozyme 2 forms cD4/T1/T3A/T3B OS=Drosophila melanogaster GN=for P	0	Both	Rel_Homo_92	medium	Both	0.779933	1.43104	0	0	NA	NA	0	0	1	0	0	0	0	0	0	1	0	0	0	5.87	0	NA	3	0	15	3	0	1		7.9881		8.30963	9.00771	7.82621		5.70359		6.07613	7.38446	6.20295
1360	Q03334	40S ribosomal protein S13	RpS13	>sp|Q03334|RS13_DROME 40S ribosomal protein S13 OS=Drosophila melanogaster GN=RpS13 PE=1 SV=3	0	Both	known285	low	Both	0.776023	0.0906689	0	1	Ribosomal_S13_N;Ribosomal_S15	1;1	1	1	1	1	1	0	1	1	0	1	1	1	0	10.55	1	NA	6	5	10	5	0	9	7.7997	9.52951		9.67429	10.4237	10.2889	6.89661	7.83758		8.06074	9.52063	9.38575
1362	Q04047-2;Q04047;Q8IR16	Protein no-on-transient A	nonA	>sp|Q04047-2|NONA_DROME Isoform 2 of Protein no-on-transient A OS=Drosophila melanogaster GN=nonA;>sp|Q04047|NONA_DROME Protein no-on-transient A OS=Drosophila melanogaster GN=nonA PE=1 SV=2;>tr|Q8IR16|Q8IR16_DROME No on or off transient A, isoform B OS=Dr	0	Both	known285	high	Both	22.1892	86.1801	1	1	RRM_1	2	1	1	1	1	0	1	1	1	1	0	0	0	0	9.39	0	NA	8	0	10	24	2	6		9.6347	7.89703	11.1466	9.0639	8.67513		7.30565	6.36554	8.79657	7.53244	7.14364
1364	Q05344	FACT complex subunit Ssrp1	Ssrp	>sp|Q05344|SSRP1_DROME FACT complex subunit Ssrp1 OS=Drosophila melanogaster GN=Ssrp PE=1 SV=2	0	Both	known285	low	Both	0.224948	0.0279429	1	0	NA	NA	1	0	1	1	1	1	1	1	0	0	1	0	0	5.45	0	yes	5	2	26	3	1	22	6.86051	8.14844	6.19907	8.18788	9.69475	9.42279	5.28071	5.89413	4.61928	6.00681	8.11498	7.84301
1369	Q06559	40S ribosomal protein S3	RpS3	>sp|Q06559|RS3_DROME 40S ribosomal protein S3 OS=Drosophila melanogaster GN=RpS3 PE=1 SV=1	0	Both	known285	medium	Both	8.18879	4.89008	1	1	KH_2;Ribosomal_S3_C	1;1	1	1	1	1	1	1	1	1	1	1	1	1	0	9.43	1	NA	21	16	32	36	13	31	8.97577	11.2533	9.25268	12.2749	10.9814	10.9666	7.67473	9.02069	7.95166	10.0724	9.6804	9.66555
1374	Q08473-2;Q08473-3;Q08473;Q08473-4	RNA-binding protein squid	sqd	>sp|Q08473-2|SQD_DROME Isoform A of RNA-binding protein squid OS=Drosophila melanogaster GN=sqd;>sp|Q08473-3|SQD_DROME Isoform C of RNA-binding protein squid OS=Drosophila melanogaster GN=sqd;>sp|Q08473|SQD_DROME RNA-binding protein squid OS=Drosophila mel	0	Both	known285	high	Both	60.6781	73.0076	1	1	RRM_1	2	1	1	1	1	1	1	1	1	1	0	1	1	1	6.93	0	NA	13	5	11	35	13	10	9.32691	11.1098	9.53638	12.6305	9.98	10.1221	8.24773	9.11093	8.4572	10.6238	8.90082	9.04289
1379	Q0E8G6;Q9VSY2			>tr|Q0E8G6|Q0E8G6_DROME CG3689, isoform C OS=Drosophila melanogaster GN=CG3689 PE=4 SV=1;>tr|Q9VSY2|Q9VSY2_DROME CG3689, isoform B OS=Drosophila melanogaster GN=CG3689 PE=2 SV=2	0	Both	known285	medium	Both	0.509825	3.80995	1	1	NUDIX_2	1	1	1	1	1	0	1	1	1	1	0	0	0	0	8.89	0	NA	2	0	7	9	1	9		7.86717	7.1833	10.3423	9.08146	9.28432		6.06982	6.03719	8.43662	7.93532	8.13818
1390	Q0E965;A1ZA05		SRPK	>tr|Q0E965|Q0E965_DROME SRPK, isoform A OS=Drosophila melanogaster GN=SRPK PE=4 SV=1;>tr|A1ZA05|A1ZA05_DROME SRPK, isoform C OS=Drosophila melanogaster GN=SRPK PE=4 SV=1	0	Both	Rel_Homo_92	medium	Both	4.68887	3.54544	0	0	NA	NA	0	0	0	1	0	1	1	1	1	1	0	0	0	9.1	0	NA	11	0	19	19	8	14		9.20125	7.93284	10.238	9.34143	9.21898		6.9081	6.40137	7.95469	7.80996	7.68749
1391	Q0E993		Aats-val	>tr|Q0E993|Q0E993_DROME Valyl-tRNA synthetase, isoform A OS=Drosophila melanogaster GN=Aats-val PE=3 SV=1	0	Both	known285	medium	Both	0.260789	8.18363	0	1	Anticodon_1;tRNA.synt_1	1;1	1	1	1	0	1	0	0	0	0	0	1	1	0	6.23	0	NA	3	7	45	8	2	3	7.56699	8.64012	6.86168	9.18308	10.0815	7.87821	5.82663	6.18452	5.12133	6.76833	8.34116	6.13786
1392	Q0E9A5		muskelin	>tr|Q0E9A5|Q0E9A5_DROME FI21269p1 OS=Drosophila melanogaster GN=muskelin PE=2 SV=1	0	Both	new99	high	Both	1.44561	102.392	0	0	NA	NA	0	0	0	0	0	0	0	0	0	0	0	0	0	5.94	0	NA	5	0	24	23	3	5		8.78355	6.88739	10.0296	9.46934	7.56525		6.48827	5.31919	7.72484	7.90114	5.99705
1394	Q0E9B6;A1Z8U9	40S ribosomal protein S11	RpS11	>sp|Q0E9B6|RS11_DROME 40S ribosomal protein S11 OS=Drosophila melanogaster GN=RpS11 PE=1 SV=1;>tr|A1Z8U9|A1Z8U9_DROME Ribosomal protein S11, isoform B OS=Drosophila melanogaster GN=RpS11 PE=3 SV=1	0	Both	known285	high	Both	1.06392	316.918	1	1	Ribosomal_S17	1	1	1	1	1	1	1	0	1	1	0	1	1	0	10.93	1	NA	8	5	14	14	8	7	8.35197	9.7941	8.19609	11.9679	10.5294	8.87049	7.39773	8.0291	7.24185	10.1347	9.57512	7.91624
1425	Q23972;Q23972-2	Protein Smaug	smg	>sp|Q23972|SMG_DROME Protein Smaug OS=Drosophila melanogaster GN=smg PE=1 SV=2;>sp|Q23972-2|SMG_DROME Isoform D of Protein Smaug OS=Drosophila melanogaster GN=smg	positive control	Both	known285	high	Both	13.3001	18.1719	1	1	PHAT	1	1	1	1	1	0	1	1	1	0	0	0	0	0	7.11	0	NA	11	5	20	24	12	18	8.06228	9.96637	9.09868	11.2389	9.59043	9.43664	6.61512	7.69419	7.65153	8.96641	8.14326	7.98949
1434	Q24113		nonA-l	>tr|Q24113|Q24113_DROME FI21126p1 OS=Drosophila melanogaster GN=nonA-l PE=2 SV=2	0	Both	known285	high	Both	19.4636	1900.01	1	1	RRM_1	2	1	1	1	1	0	1	1	1	1	0	0	0	0	8.78	0	NA	4	0	2	15	1	1		8.37312	6.28244	10.2259	7.9637	6.47865		6.20287	4.80532	7.9978	6.48657	5.00152
1446	Q24186	40S ribosomal protein S5a	RpS5a	>sp|Q24186|RS5A_DROME 40S ribosomal protein S5a OS=Drosophila melanogaster GN=RpS5a PE=1 SV=1	0	Both	known285	medium	Both	1.42308	4.05547	1	1	Ribosomal_S7	1	1	1	1	1	1	1	1	1	1	1	1	1	0	8.89	1	NA	5	5	13	14	5	13	7.81417	9.57276	7.7229	11.3444	10.2	10.1857	6.85992	7.82609	6.76866	9.55701	9.24578	9.23144
1447	Q24208;Q24208-2	Eukaryotic translation initiation factor 2 subunit 3	Su(var)3-9	>sp|Q24208|IF2G_DROME Eukaryotic translation initiation factor 2 subunit 3 OS=Drosophila melanogaster GN=eIF-2gamma PE=2 SV=1;>sp|Q24208-2|IF2G_DROME Isoform C of Eukaryotic translation initiation factor 2 subunit 3 OS=Drosophila melanogaster GN=eIF-2gamma	0	Both	known285	low	Both	0.272699	0.276577	1	1	eIF2_C;GTP_EFTU;GTP_EFTU_D2	1;1;1	1	0	1	0	1	0	0	0	0	0	0	1	0	8.97	0	maybe	5	4	27	9	0	14	7.61206	8.8503		9.06924	10.2549	9.24386	6.21413	6.71975		7.00527	8.85699	7.84592
1456	Q24311	Cullin homolog 1	lin19	>sp|Q24311|CUL1_DROME Cullin homolog 1 OS=Drosophila melanogaster GN=lin19 PE=1 SV=2	0	Both	new99	high	Both	0.770943	70.0925	0	0	NA	NA	0	0	0	0	1	0	0	0	0	0	0	1	0	8.02	0	NA	3	2	26	6	1	1	6.82198	8.48209	6.34252	8.86302	9.46584	6.64895	5.21992	6.17788	4.74047	6.61008	7.86379	5.04689
1473	Q24491;Q8SYR3	RNA-binding protein Rsf1	Rsf1	>sp|Q24491|RX21_DROME RNA-binding protein Rsf1 OS=Drosophila melanogaster GN=Rsf1 PE=1 SV=1;>tr|Q8SYR3|Q8SYR3_DROME RE39606p OS=Drosophila melanogaster GN=Rsf1 PE=2 SV=1	0	Both	known285	high	Both	39.943	64.4877	1	1	RRM_1	1	1	0	1	0	1	0	0	0	0	1	1	1	1	10.57	0	NA	4	0	3	7	0	2		9.1241		10.1845	8.34029	7.9096		7.28961		8.35742	7.2611	6.83042
1474	Q24492	Replication protein A 70 kDa DNA-binding subunit	RpA-70	>sp|Q24492|RFA1_DROME Replication protein A 70 kDa DNA-binding subunit OS=Drosophila melanogaster GN=RpA-70 PE=1 SV=1	0	Both	known285	medium	Both	0.358734	5.11339	0	1	tRNA_anti.codon	1	1	0	0	0	1	0	0	0	0	1	1	1	1	6.31	0	no	4	5	31	24	2	25	7.74621	8.87145	6.85172	10.8725	10.1552	9.64779	6.25484	6.64571	5.36037	8.58267	8.66386	8.15643
1486	Q26454	DNA replication licensing factor MCM4	dpa	>sp|Q26454|MCM4_DROME DNA replication licensing factor MCM4 OS=Drosophila melanogaster GN=dpa PE=1 SV=2	0	Both	new99	low	Both	0.248125	0.292091	0	0	NA	NA	0	0	0	0	1	0	0	0	0	0	1	1	0	7.28	0	NA	6	3	40	9	2	24	6.92867	8.59659	6.72886	9.12289	10.0632	9.26989	5.22971	6.186	5.02991	6.75395	8.36425	7.5709
1488	Q27268;M9PC90	ATP-dependent RNA helicase WM6	Hel25E	>sp|Q27268|DX39B_DROME ATP-dependent RNA helicase WM6 OS=Drosophila melanogaster GN=Hel25E PE=1 SV=1;>tr|M9PC90|M9PC90_DROME Helicase at 25E, isoform D OS=Drosophila melanogaster GN=Hel25E PE=4 SV=1	0	Both	known285	low	Both	0.399166	0.766323	1	1	DEAD	1	1	1	1	1	1	1	1	1	1	1	1	1	0	5.43	0	NA	5	2	23	14	6	21	7.25288	8.68273	8.24408	10.135	9.93574	9.78876	5.95184	6.66295	6.94304	8.08966	8.63472	8.48772
1508	Q7KY08;Q32KD4		AGO1	>tr|Q7KY08|Q7KY08_DROME Argonaute protein OS=Drosophila melanogaster GN=AGO1 PE=2 SV=1;>tr|Q32KD4|Q32KD4_DROME Argonaute-1, isoform A OS=Drosophila melanogaster GN=AGO1 PE=1 SV=1	0	Both	known285	high	365nm (X490) unique	10.5213	YW whole not available	1	1	PAZ;Piwi	1;1	1	1	1	1	0	1	1	1	1	0	0	0	0	9.29	0	no	5	0	12	42	0	0		8.74533		10.6718	8.57224			6.38792		8.25457	6.93878
1523	Q4Z8K6-3;Q4Z8K6-2;Q4Z8K6	Ran-binding proteins 9/10 homolog	RanBPM	>sp|Q4Z8K6-3|RBP9X_DROME Isoform C of Ran-binding proteins 9/10 homolog OS=Drosophila melanogaster GN=RanBPM;>sp|Q4Z8K6-2|RBP9X_DROME Isoform A of Ran-binding proteins 9/10 homolog OS=Drosophila melanogaster GN=RanBPM;>sp|Q4Z8K6|RBP9X_DROME Ran-binding pro	0	Both	new99	medium	Both	1.78479	3.64076	0	0	NA	NA	0	0	0	0	0	0	0	0	0	0	0	0	0	4.93	0	NA	4	2	19	14	3	7	7.11744	8.89944	7.47461	9.98136	9.48407	8.96962	5.67029	6.71557	6.02743	7.80118	8.03691	7.52246
1526	Q59DT6;Q02926-2;A4V3G9;Q02926;A4V3H1	Ribonucleoprotein RB97D	Rb97D	>tr|Q59DT6|Q59DT6_DROME Ribonuclear protein at 97D, isoform D OS=Drosophila melanogaster GN=Rb97D PE=4 SV=1;>sp|Q02926-2|RB97D_DROME Isoform A of Ribonucleoprotein RB97D OS=Drosophila melanogaster GN=Rb97D;>tr|A4V3G9|A4V3G9_DROME Ribonuclear protein at 97D	0	Both	known285	high	Both	55.4522	516.868	1	1	RRM_1	2	1	1	1	0	1	0	0	0	0	1	1	1	1	8.97	0	NA	3	0	2	26	0	1		8.76563		11.2178	7.869	7.96313		6.76124		9.11528	6.59025	6.68437
1539	Q5KTT4;Q0E996		NAT1	>tr|Q5KTT4|Q5KTT4_DROME NAT1, isoform C (Fragment) OS=Drosophila melanogaster GN=NAT1 PE=2 SV=1;>tr|Q0E996|Q0E996_DROME NAT1, isoform A OS=Drosophila melanogaster GN=NAT1 PE=4 SV=1	0	Both	known285	medium	Both	10.4044	2.63306	1	1	MIF4G;W2	1;1	1	1	1	1	1	1	1	1	1	0	1	1	1	8.91	0	NA	27	9	42	47	28	53	7.83812	10.0303	8.52967	10.9202	9.75573	9.98027	5.9405	7.3024	6.63204	8.22063	7.8581	8.08264
1556	Q6J5K9;Q6J5K9-2;M9NDG7	Probable RNA helicase armi	armi	>sp|Q6J5K9|ARMI_DROME Probable RNA helicase armi OS=Drosophila melanogaster GN=armi PE=1 SV=3;>sp|Q6J5K9-2|ARMI_DROME Isoform B of Probable RNA helicase armi OS=Drosophila melanogaster GN=armi;>tr|M9NDG7|M9NDG7_DROME Armitage, isoform C OS=Drosophila melan	0	Both	Rel_Homo_92	medium	Both	1.84741	0.723536	0	0	NA	NA	0	1	1	0	1	0	0	0	0	0	1	1	1	5.87	0	NA	3	0	5	12	1	3		8.26672	6.05614	9.27724	8.88876	9.01899		5.68477	4.15851	6.69832	6.99114	7.12133
1583	Q7JR58			>tr|Q7JR58|Q7JR58_DROME CG6543, isoform A OS=Drosophila melanogaster GN=CG6543 PE=2 SV=1	Validated	Both	new99	low	Both	0.516704	0.244329	0	0	NA	NA	0	0	0	0	0	0	0	0	0	1	0	0	0	8.88	0	NA	6	7	16	14	3	12	8.27644	9.52744	7.55071	10.3097	10.5985	10.4471	7.02119	7.48349	6.29544	8.29734	9.34317	9.19184
1592	Q7JRH5			>tr|Q7JRH5|Q7JRH5_DROME CG5726 OS=Drosophila melanogaster GN=CG5726 PE=2 SV=1	0	Both	Rel_Homo_92	high	Both	54.5277	38.9589	0	0	NA	NA	0	0	1	0	0	0	0	0	0	0	0	0	0	7.44	0	NA	14	6	15	28	16	11	7.93316	10.2382	8.74441	11.1635	9.22701	9.03551	6.40168	7.85922	7.21293	8.81217	7.69553	7.50404
1598	Q7JUX9	Mitochondrial ribonuclease P protein 1 homolog	trmt10c	>sp|Q7JUX9|MRRP1_DROME Mitochondrial ribonuclease P protein 1 homolog OS=Drosophila melanogaster GN=trmt10c PE=1 SV=1	0	Both	known285	high	Both	10.8505	193.432	0	1	tRNA_m1G_MT	1	1	1	1	1	0	1	1	1	0	0	0	0	0	9.27	0	NA	2	0	5	23	0	1		8.14882		10.5407	8.01174	7.76252		6.0271		8.31942	6.56458	6.31536
1605	Q7JVI3	Eukaryotic translation initiation factor 3 subunit M	Tango7	>sp|Q7JVI3|EIF3M_DROME Eukaryotic translation initiation factor 3 subunit M OS=Drosophila melanogaster GN=Tango7 PE=2 SV=1	0	Both	known285	low	Both	0.0509088	0.0252396	1	0	NA	NA	1	1	1	0	0	0	0	0	0	1	0	0	0	5.46	0	NA	2	1	24	7	1	27	6.57011	7.93746	6.30235	8.8299	10.1465	10.0618	5.13874	5.84903	4.87098	6.75007	8.71516	8.63046
1612	Q7JVY0	Coronin	coro	>tr|Q7JVY0|Q7JVY0_DROME Coronin OS=Drosophila melanogaster GN=coro PE=2 SV=1	0	Both	Rel_Homo_92	low	Both	0.363321	0.146445	0	0	NA	NA	0	0	0	1	0	1	0	0	0	0	0	0	0	5.95	0	NA	3	1	18	4	0	10	6.64874	8.4765		8.60963	9.78746	9.09416	5.32652	6.4526		6.65513	8.46523	7.77193
1619	Q7JW66			>tr|Q7JW66|Q7JW66_DROME CG12129 OS=Drosophila melanogaster GN=CG12129 PE=2 SV=1	0	Both	known285	high	Both	0.572413	33.1458	1	1	AKAP7_NLS;KH_1	1;1	1	1	1	0	0	0	0	0	0	0	0	0	0	6.53	0	NA	2	0	13	11	0	3		7.79869		9.55531	8.96833	7.61562		5.8309		7.53136	7.64612	6.29341
1652	Q7JZD3;Q9XZ57;A1Z6P3		Eb1	>tr|Q7JZD3|Q7JZD3_DROME Eb1, isoform A OS=Drosophila melanogaster GN=Eb1 PE=2 SV=1;>tr|Q9XZ57|Q9XZ57_DROME Eb1, isoform E OS=Drosophila melanogaster GN=Eb1 PE=2 SV=1;>tr|A1Z6P3|A1Z6P3_DROME Eb1, isoform F OS=Drosophila melanogaster GN=Eb1 PE=2 SV=2	Validated	Both	new99	low	Both	0.133079	0.0677726	0	0	NA	NA	0	0	0	0	0	0	0	0	0	0	0	0	0	5.18	0	NA	2	3	25	11	1	24	7.04036	8.27709	6.13075	9.59362	10.0407	10.3405	5.78507	6.33664	4.87547	7.6338	8.78546	9.08522
1682	Q9VCB6;Q7K112;Q8IMX1;Q8IMX0		twin	>tr|Q9VCB6|Q9VCB6_DROME AT23187p OS=Drosophila melanogaster GN=twin PE=2 SV=2;>tr|Q7K112|Q7K112_DROME LD18435p OS=Drosophila melanogaster GN=twin PE=2 SV=1;>tr|Q8IMX1|Q8IMX1_DROME LD39302p OS=Drosophila melanogaster GN=twin PE=2 SV=1;>tr|Q8IMX0|Q8IMX0_DROM	0	Both	known285	medium	Both	0.517218	3.00748	0	1	Exo_endo_phos	1	1	1	1	0	1	0	0	0	0	0	0	1	0	6.13	0	no	3	2	18	12	0	12	6.84828	8.3324		9.65246	9.50188	8.74787	5.38587	6.18024		7.4812	8.03949	7.28547
1698	Q7K1U0;A1Z9P8		Arc1	>tr|Q7K1U0|Q7K1U0_DROME Arc1 OS=Drosophila melanogaster GN=Arc1 PE=2 SV=1	0	Both	new99	high	Both	3.63686	20.8878	0	0	NA	NA	0	0	0	0	0	0	0	0	0	0	0	0	0	6.01	0	NA	2	0	9	10	0	4		8.2151		9.65284	8.54727	7.90652		6.25631		7.66519	7.26851	6.62777
1732	Q7K3J0			>tr|Q7K3J0|Q7K3J0_DROME CG8258 OS=Drosophila melanogaster GN=CG8258 PE=2 SV=1	0	Both	Rel_Homo_92	low	Both	0.249845	0.0372761	0	0	NA	NA	0	0	1	0	1	0	0	0	0	1	1	1	0	5.19	0	NA	11	9	36	15	2	35	8.22141	9.43816	6.86297	9.69666	10.8321	10.6956	6.68993	7.12538	5.33149	7.45307	9.30064	9.16411
1733	Q7K3M5			>tr|Q7K3M5|Q7K3M5_DROME CG11107 OS=Drosophila melanogaster GN=CG11107 PE=2 SV=1	0	Both	known285	high	Both	0.505807	36.6298	0	1	DEAD;HA2	1;1	1	1	1	1	1	1	1	1	1	0	1	1	0	6.67	0	NA	2	2	24	20	2	2	7.26252	8.36285	7.29203	9.89858	9.53952	7.89027	5.68273	6.09079	5.71226	7.59184	7.95973	6.31048
1736	Q7K3W2		CG8728-RA	>tr|Q7K3W2|Q7K3W2_DROME CG8728 OS=Drosophila melanogaster GN=CG8728-RA PE=2 SV=1	0	Both	new99	low	Both	1.02493	0.14354	0	0	NA	NA	0	0	0	0	0	0	0	0	0	0	0	0	0	6.66	0	NA	4	3	20	8	0	15	7.24224	8.76246		8.7519	9.59935	9.23467	5.81089	6.60574		6.67781	8.16797	7.80331
1748	Q7K4L8			>tr|Q7K4L8|Q7K4L8_DROME CG7878 OS=Drosophila melanogaster GN=CG7878 PE=2 SV=1	0	Both	known285	high	Both	50.3047	2083.94	1	1	DEAD;KH_1	1;1	1	1	1	1	1	0	0	1	0	0	1	1	0	6.26	0	NA	19	2	12	44	12	3	6.87052	9.76427	8.08583	11.5545	8.82728	7.66955	5.24726	7.33272	6.46258	9.08271	7.20404	6.0463
1762	Q7K581			>tr|Q7K581|Q7K581_DROME CG8963, isoform A OS=Drosophila melanogaster GN=CG8963 PE=2 SV=1	0	Both	known285	high	Both	19.251	17.1982	1	1	MIF4G	1	1	1	1	1	0	0	0	1	0	0	0	0	0	5.77	0	NA	11	9	12	23	8	13	8.32067	10.1121	8.34056	11.4445	9.56347	9.65107	7.01966	7.97395	7.03953	9.30304	8.26243	8.35003
1764	Q7K5K3			>tr|Q7K5K3|Q7K5K3_DROME CG11876, isoform A OS=Drosophila melanogaster GN=CG11876 PE=2 SV=1	0	Both	new99	low	Both	0.437353	0.00948066	0	0	NA	NA	0	0	0	0	1	0	0	0	0	1	1	0	0	7.66	0	no	6	6	18	2	0	18	7.72323	8.82516		8.18639	10.0267	9.89083	6.4222	6.79358		6.28416	8.72567	8.58979
1769	Q7K7A9	Flap endonuclease 1	Fen1	>sp|Q7K7A9|FEN1_DROME Flap endonuclease 1 OS=Drosophila melanogaster GN=Fen1 PE=2 SV=1	0	Both	Rel_Homo_92	low	Both	1.11733	0.318737	0	0	NA	NA	0	0	1	1	0	0	0	1	0	0	0	0	0	8.73	0	no	3	2	11	5	0	10	6.75485	8.26863		9.03767	9.1089	9.15299	5.47609	6.30539		7.0952	7.83014	7.87424
1782	Q7KK96	Structural maintenance of chromosomes protein	SMC2	>tr|Q7KK96|Q7KK96_DROME Structural maintenance of chromosomes protein OS=Drosophila melanogaster GN=SMC2 PE=2 SV=1	0	Both	new99	medium	Both	0.935212	5.02695	0	0	NA	NA	0	0	0	0	1	0	0	0	0	0	1	0	0	8.36	0	NA	4	3	24	8	1	5	7.19535	8.38254	6.27166	9.01819	9.29064	7.9371	5.37579	5.86908	4.45211	6.53637	7.4711	6.11754
1783	Q7KKI0;A1Z8U4		Cct5	>tr|Q7KKI0|Q7KKI0_DROME GM12270p OS=Drosophila melanogaster GN=Cct5 PE=2 SV=1;>tr|A1Z8U4|A1Z8U4_DROME T-complex chaperonin 5, isoform B OS=Drosophila melanogaster GN=Cct5 PE=3 SV=1	0	Both	new99	low	Both	0.123327	0.142804	0	0	NA	NA	0	0	0	0	1	0	0	0	0	1	1	0	0	5.88	0	NA	7	7	35	14	6	34	8.10924	9.11944	7.32094	9.84552	10.8464	10.2502	6.6321	6.8874	5.84382	7.64535	9.36927	8.77308
1789	Q7KM15		bic	>tr|Q7KM15|Q7KM15_DROME Beta NAC homolog OS=Drosophila melanogaster GN=bic PE=2 SV=1	Validated	Both	Rel_Homo_92	low	Both	0.0496968	0.0210764	0	0	NA	NA	0	0	1	1	1	1	1	1	1	1	1	0	0	6.84	0	no	2	1	15	5	2	15	7.10041	8.28375	7.11638	9.85949	10.4746	11.0941	6.2553	6.75292	6.27128	8.2903	9.62952	10.249
1793	Q7KMJ6		nito	>tr|Q7KMJ6|Q7KMJ6_DROME BcDNA.GH11110 OS=Drosophila melanogaster GN=nito PE=2 SV=1	0	Both	known285	high	Both	53.6483	13101.5	1	1	RRM_1	2	1	1	1	1	0	1	1	1	1	0	0	0	0	9.42	0	NA	14	1	16	52	15	3	7.21835	9.91882	8.32717	12.278	8.94111	7.54147	5.5749	7.45428	6.68372	9.73286	7.29765	5.89801
1800	Q7KN62;Q7KN62-3;Q7KN62-2;Q8IGZ2	Transitional endoplasmic reticulum ATPase TER94	TER94	>sp|Q7KN62|TERA_DROME Transitional endoplasmic reticulum ATPase TER94 OS=Drosophila melanogaster GN=TER94 PE=1 SV=1;>sp|Q7KN62-3|TERA_DROME Isoform C of Transitional endoplasmic reticulum ATPase TER94 OS=Drosophila melanogaster GN=TER94;>sp|Q7KN62-2|TERA_D	0	Both	Rel_Homo_92	low	Both	0.551633	0.241113	0	0	NA	NA	0	0	1	1	1	0	1	1	0	1	1	1	0	5.21	0	NA	19	17	56	28	16	48	8.8108	10.0511	9.00608	10.3558	11.0503	10.4955	7.15758	7.56581	7.35288	7.94206	9.39709	8.84231
1801	Q7KN75		Dp1	>tr|Q7KN75|Q7KN75_DROME Dodeca-satellite-binding protein 1, isoform A OS=Drosophila melanogaster GN=Dp1 PE=2 SV=1	0	Both	known285	high	Both	33.4148	137.717	1	1	KH_1	14	1	1	1	1	1	1	1	1	1	0	1	1	1	5.86	0	no	57	12	47	84	32	33	8.24291	11.0257	9.02894	12.4171	10.162	9.64866	6.45759	8.32764	7.24358	9.71984	8.37663	7.86333
1805	Q7KN94		wal	>tr|Q7KN94|Q7KN94_DROME Walrus, isoform A OS=Drosophila melanogaster GN=wal PE=2 SV=1	0	Both	new99	low	Both	0.158589	0.0217223	0	0	NA	NA	0	0	0	0	1	0	0	0	0	1	1	0	0	8.39	0	NA	2	0	20	2	0	17		8.42228		8.88306	10.0977	10.1763		6.46981		6.97542	8.84246	8.92099
1806	Q7KN97;Q0E9E2	Pyruvate carboxylase		>tr|Q7KN97|Q7KN97_DROME Pyruvate carboxylase OS=Drosophila melanogaster GN=CG1516 PE=2 SV=1;>tr|Q0E9E2|Q0E9E2_DROME Pyruvate carboxylase OS=Drosophila melanogaster GN=CG1516 PE=3 SV=1	0	Both	new99	low	Both	0.348711	0.328492	0	0	NA	NA	0	0	0	1	1	0	0	1	0	1	1	0	0	6.36	0	NA	11	12	56	16	0	35	7.97347	9.07222		9.31762	10.3517	9.39929	6.16056	6.50831		6.82044	8.53877	7.58638
1813	Q7KNS5;A1ZAT7		qkr54B	>tr|Q7KNS5|Q7KNS5_DROME Quaking related 54B, isoform A OS=Drosophila melanogaster GN=qkr54B PE=2 SV=1;>tr|A1ZAT7|A1ZAT7_DROME Quaking related 54B, isoform C OS=Drosophila melanogaster GN=qkr54B PE=4 SV=1	0	Both	known285	high	Both	26.6252	98.3112	1	1	KH_1	1	1	1	1	1	1	1	1	1	1	0	0	1	0	7.81	0	NA	3	1	4	13	0	2	6.48474	8.69927		10.0742	8.12678	7.62426	5.37081	6.8652		8.22045	7.01284	6.51032
1815	Q7KQM6-2;Q7KQM6	PERQ amino acid-rich with GYF domain-containing protein CG11148	CG11148	>sp|Q7KQM6-2|PERQ1_DROME Isoform D of PERQ amino acid-rich with GYF domain-containing protein CG11148 OS=Drosophila melanogaster GN=CG11148;>sp|Q7KQM6|PERQ1_DROME PERQ amino acid-rich with GYF domain-containing protein CG11148 OS=Drosophila melanogaster GN	0	Both	Rel_Homo_92	medium	Both	3.64439	0.323139	0	0	NA	NA	0	0	0	1	0	0	1	1	0	0	0	0	0	6.65	0	NA	3	3	21	12	0	20	6.88924	8.64509		9.12079	8.94077	9.22407	5.02592	6.06614		6.58764	7.07744	7.36073
1817	Q7KQZ4-3;P42284-1;P42284-3;Q867Z4-3;P42284;Q867Z4-2;Q867Z4-5;Q9V5M3-5;Q9V5M3-4;Q9V5M6-3;Q7KQZ4-4;Q9V5M6-5;Q9V5M3-2;Q7KQZ4-2;Q9V5M6-4;Q9V5M6-2;Q9V5M3-3;Q7KQZ4;Q9V5M3;Q9V5M6;Q867Z4	Longitudinals lacking protein, isoforms H/M/V;Longitudinals lacking protein, isoforms A/B/D/L;Longitudinals lacking protein, isoforms N/O/W/X/Y;Longitudinals lacking protein, isoforms J/P/Q/S/Z;Longitudinals lacking protein, isoforms F/I/K/T	lola	>sp|Q7KQZ4-3|LOLA3_DROME Isoform D of Longitudinals lacking protein, isoforms A/B/D/L OS=Drosophila melanogaster GN=lola;>sp|P42284-1|LOLA2_DROME Isoform M of Longitudinals lacking protein, isoforms H/M/V OS=Drosophila melanogaster GN=lola;>sp|P42284-3|LOL	0	Both	known285	medium	Both	5.8804	0.298399	0	1	zf-C2H2	manual	1	0	1	0	0	0	0	0	0	0	0	0	0	5.78	0	yes	3	0	5	2	1	5		8.2786	6.13363	8.40525	8.39681	8.59566		6.16194	4.70227	6.35662	6.96546	7.16429
1824	Q9VB04;Q7KRX5		btz	>tr|Q9VB04|Q9VB04_DROME Barentsz, isoform A OS=Drosophila melanogaster GN=btz PE=2 SV=1;>tr|Q7KRX5|Q7KRX5_DROME Barentsz, isoform B OS=Drosophila melanogaster GN=btz PE=4 SV=1	0	Both	known285	medium	Both	10.2845	1.85011	0	1	Btz	1	1	1	1	1	0	1	1	1	1	0	0	0	0	5.35	0	NA	3	0	5	12	0	7		8.71419		9.89036	8.55358	9.17932		6.6504		7.82161	7.21115	7.83689
1831	Q7KSN0;Q9VGA4		MBD-R2	>tr|Q7KSN0|Q7KSN0_DROME MBD-R2, isoform A OS=Drosophila melanogaster GN=MBD-R2 PE=2 SV=1;>tr|Q9VGA4|Q9VGA4_DROME MBD-R2, isoform B OS=Drosophila melanogaster GN=MBD-R2 PE=4 SV=2	0	Both	known285	high	Both	44.7705	34.5166	0	1	MBD	1	1	0	0	0	0	0	0	0	0	0	0	0	0	6.56	0	yes	4	0	2	6	3	1		8.42604	7.00178	8.77006	7.65048	6.87044		6.05645	5.32966	6.45388	5.97838	5.19833
1832	Q9VGG9;Q7KSN8			>tr|Q9VGG9|Q9VGG9_DROME CG31368, isoform C OS=Drosophila melanogaster GN=CG31368 PE=2 SV=4;>tr|Q7KSN8|Q7KSN8_DROME CG31368, isoform D OS=Drosophila melanogaster GN=CG31368 PE=4 SV=2	0	Both	Rel_Homo_92	high	Both	1.19408	55.3243	0	0	NA	NA	0	1	1	1	1	1	1	1	1	0	0	0	1	5.77	0	NA	3	3	25	14	1	2	6.98811	8.19714	6.46804	9.26064	9.01448	7.12011	5.06382	5.59429	4.54375	6.65626	7.09019	5.19582
1859	Q7KUA4		Uba2	>tr|Q7KUA4|Q7KUA4_DROME LD22577p OS=Drosophila melanogaster GN=Uba2 PE=2 SV=1	0	Both	Rel_Homo_92	low	Both	0.0436583	0.00881303	0	0	NA	NA	0	0	1	0	0	0	0	0	0	0	0	0	0	4.88	0	NA	2	0	23	2	0	24		7.70686		8.2453	10.0018	9.97712		5.57754		6.14842	8.5104	8.48576
1866	Q7KUX7;Q8IR13;Q9VXF8		Rbp2	>tr|Q7KUX7|Q7KUX7_DROME FI04456p OS=Drosophila melanogaster GN=Rbp2 PE=2 SV=1;>tr|Q8IR13|Q8IR13_DROME RNA-binding protein 2, isoform B OS=Drosophila melanogaster GN=Rbp2 PE=4 SV=1;>tr|Q9VXF8|Q9VXF8_DROME RNA-binding protein 2, isoform A OS=Drosophila melan	0	Both	known285	high	Both	52.2406	6.26995	1	1	RRM_1	1	1	1	1	1	0	1	1	1	1	0	0	0	0	9.46	0	NA	8	1	13	16	4	12	8.53543	10.5723	7.99666	11.4408	9.55207	10.0858	7.25667	8.41838	6.7179	9.32183	8.2733	8.80703
1879	Q7KVQ0	Probable H/ACA ribonucleoprotein complex subunit 1	CG4038	>sp|Q7KVQ0|GAR1_DROME Probable H/ACA ribonucleoprotein complex subunit 1 OS=Drosophila melanogaster GN=CG4038 PE=1 SV=1	0	Both	known285	medium	Both	6.18133	10.1053	1	1	Gar1	1	1	1	1	1	1	1	1	1	1	1	0	1	0	11.2	0	NA	3	1	7	8	2	7	7.33391	9.08394	7.12441	10.6285	9.11381	9.1259	6.1878	7.18583	5.97829	8.70186	7.96767	7.97979
1880	Q9W4C4;Q7KVW1		spoon	>tr|Q9W4C4|Q9W4C4_DROME GM14014p OS=Drosophila melanogaster GN=spoon PE=2 SV=2;>tr|Q7KVW1|Q7KVW1_DROME RE73736p OS=Drosophila melanogaster GN=spoon PE=2 SV=1	0	Both	known285	high	Both	7.36089	19.3154	1	1	KH_1;TUDOR	1;1	1	1	1	1	0	1	1	1	1	1	0	0	0	5.97	0	NA	7	0	13	20	2	9		8.84652	7.29942	10.5087	8.82022	8.73352		6.73402	5.91921	8.35673	7.44001	7.3533
1885	Q9W5Y4;Q7KWH0;Q7KWG9		CG17018-RC;CG17018-RD	>tr|Q9W5Y4|Q9W5Y4_DROME CG17018, isoform A OS=Drosophila melanogaster GN=CG17018-RC PE=2 SV=2;>tr|Q7KWH0|Q7KWH0_DROME CG17018, isoform C OS=Drosophila melanogaster GN=CG17018-RC PE=2 SV=1;>tr|Q7KWG9|Q7KWG9_DROME CG17018, isoform D OS=Drosophila melanogaste	0	Both	Rel_Homo_92	high	Both	76.0777	5288.56	0	0	NA	NA	0	1	0	1	0	0	0	1	0	0	0	0	0	8.56	0	NA	10	2	10	40	3	1	7.08124	9.32833	6.87467	10.2957	8.2478	6.09871	5.26832	6.74322	5.06175	7.72667	6.43489	4.2858
1892	Q7PLL3;Q7PLL1;Q8SYL3;L7EEF1		eIF-4B	>tr|Q7PLL3|Q7PLL3_DROME Eukaryotic initiation factor 4B OS=Drosophila melanogaster GN=eIF-4B PE=2 SV=1;>tr|Q7PLL1|Q7PLL1_DROME Eukaryotic initiation factor 4B, isoform E OS=Drosophila melanogaster GN=eIF-4B PE=4 SV=2;>tr|Q8SYL3|Q8SYL3_DROME Eukaryotic init	0	Both	known285	medium	Both	1.60049	5.1896	1	1	RRM_1	1	1	1	1	1	0	1	1	1	1	0	0	0	0	6.55	0	NA	8	2	18	26	3	17	7.30726	9.07132	7.25551	11.1483	9.68907	9.89694	5.94554	6.95866	5.89378	8.96788	8.32734	8.53522
1893	Q7PLL6;D2A6J9;Q9VXS6			>tr|Q7PLL6|Q7PLL6_DROME CG17514, isoform A OS=Drosophila melanogaster GN=CG17514 PE=4 SV=2	0	Both	Rel_Homo_92	high	Both	1.79557	88.0241	0	0	NA	NA	0	0	0	1	1	0	1	1	1	0	1	1	0	6.62	0	NA	19	5	74	65	23	6	7.6363	9.30045	8.22917	10.3546	9.84929	7.932	5.47493	6.3692	6.06781	7.43276	7.68792	5.77063
1914	Q86BI3;F0JAG2;Q9VUY6		Zn72D;Zn72D-RB	>tr|Q86BI3|Q86BI3_DROME Zinc-finger protein at 72D, isoform B OS=Drosophila melanogaster GN=Zn72D PE=4 SV=1;>tr|F0JAG2|F0JAG2_DROME MIP27703p OS=Drosophila melanogaster GN=Zn72D PE=2 SV=1;>tr|Q9VUY6|Q9VUY6_DROME GH12756p OS=Drosophila melanogaster GN=Zn72D	0	Both	known285	high	Both	181.99	207.01	0	1	zf.met;DZF	3;1	1	1	1	1	0	1	1	1	1	0	0	0	0	8.68	0	NA	33	10	18	41	25	5	8.24554	11.0296	9.06224	11.6472	9.42949	8.75828	6.59233	8.4634	7.40902	9.13859	7.77628	7.10507
1928	Q86BY9	Protein rigor mortis	rig	>sp|Q86BY9|RIG_DROME Protein rigor mortis OS=Drosophila melanogaster GN=rig PE=1 SV=1	0	Both	Rel_Homo_92	high	Both	11.0532	84.4673	0	0	NA	NA	0	0	1	0	0	0	0	0	0	0	0	0	0	6.32	0	maybe	17	12	37	55	29	10	8.58696	10.1793	9.1848	11.3381	9.8661	8.86124	6.79457	7.54428	7.39242	8.71307	8.07372	7.06885
1933	Q8I0G5-3;Q8I0G5-2;Q8I0G5	Coatomer subunit gamma	gammaCop	>sp|Q8I0G5-3|COPG_DROME Isoform C of Coatomer subunit gamma OS=Drosophila melanogaster GN=gammaCop;>sp|Q8I0G5-2|COPG_DROME Isoform A of Coatomer subunit gamma OS=Drosophila melanogaster GN=gammaCop;>sp|Q8I0G5|COPG_DROME Coatomer subunit gamma OS=Drosophila	0	Both	new99	low	Both	0.373988	1.39172	0	0	NA	NA	0	0	0	0	1	0	0	0	0	1	1	1	0	5.46	0	NA	3	1	28	11	2	9	6.72328	8.45455	6.72796	9.2272	9.75477	8.6885	5.07007	6.10147	5.07474	6.89635	8.10154	7.03527
1946	Q8IH14		ssx	>tr|Q8IH14|Q8IH14_DROME LD21345p OS=Drosophila melanogaster GN=ssx PE=2 SV=1	0	Both	known285	high	254nm (YW) unique	X490 whole not available	183.034	1	1	RRM_1	2	1	0	1	0	1	0	0	0	0	0	1	1	1	6.44	0	NA	5	0	0	14	0	2		8.99148		10.8199		8.04521		7.10102		8.87913		6.89907
1952	Q8IML9;P49762-3;B7Z0R6;Q0KI03;P49762-2;A4V3J9;A8JRF7;E1JJ11;P49762;Q86B72;Q86B73	Serine/threonine-protein kinase Doa	Doa	>tr|Q8IML9|Q8IML9_DROME 105 kDa Doa protein kinase OS=Drosophila melanogaster GN=Doa PE=2 SV=2;>sp|P49762-3|DOA_DROME Isoform B of Serine/threonine-protein kinase Doa OS=Drosophila melanogaster GN=Doa;>tr|B7Z0R6|B7Z0R6_DROME Darkener of apricot, isoform V	0	Both	Rel_Homo_92	high	Both	20.3693	31.728	0	0	NA	NA	0	1	1	1	0	1	1	0	0	0	0	0	0	9.48	0	NA	2	0	1	4	0	1		7.99668		8.74563	7.59867	6.88438		5.67196		6.44059	5.93591	5.22162
1959	Q9VCE3;Q8IMX4		Rox8	>tr|Q9VCE3|Q9VCE3_DROME Rox8, isoform B OS=Drosophila melanogaster GN=Rox8 PE=4 SV=1;>tr|Q8IMX4|Q8IMX4_DROME FI04408p OS=Drosophila melanogaster GN=Rox8 PE=2 SV=1	0	Both	known285	high	Both	8.54841	347.056	1	1	RRM_1	3	1	1	1	1	1	1	1	1	1	0	1	1	1	7.69	0	NA	5	2	10	20	5	7	7.3145	9.43125	8.51892	12.1263	9.29157	8.9779	6.27312	7.60914	7.47753	10.1944	8.25018	7.9365
1981	Q9VHI8;Q8INP8;Q8INP9			>tr|Q9VHI8|Q9VHI8_DROME CG11980, isoform A OS=Drosophila melanogaster GN=CG11980 PE=4 SV=2;>tr|Q8INP8|Q8INP8_DROME CG11980, isoform B OS=Drosophila melanogaster GN=CG11980 PE=4 SV=1;>tr|Q8INP9|Q8INP9_DROME CG11980, isoform C OS=Drosophila melanogaster GN=C	0	Both	new99	low	Both	0.262049	0.0164015	0	0	NA	NA	0	0	0	0	1	0	0	0	0	0	1	0	0	6.08	0	NA	3	0	21	8	0	22		8.7254		8.6708	10.1577	10.1016		6.64138		6.6723	8.79593	8.73989
1984	Q9I7M3;Q8INW5;Q9VIW5		CG10237-RC	>tr|Q9I7M3|Q9I7M3_DROME CG10237, isoform A OS=Drosophila melanogaster GN=CG10237 PE=4 SV=1;>tr|Q8INW5|Q8INW5_DROME CG10237, isoform C OS=Drosophila melanogaster GN=CG10237-RC PE=2 SV=1;>tr|Q9VIW5|Q9VIW5_DROME CG10237, isoform B OS=Drosophila melanogaster G	0	Both	new99	medium	Both	0.72766	1.73846	0	0	NA	NA	0	0	0	0	0	0	0	0	0	0	0	0	0	8.66	0	NA	2	2	14	4	0	3	6.81511	8.18447		8.67071	9.21796	8.07624	5.61099	6.30285		6.82982	8.01385	6.87213
1999	Q8IPE8;Q9V397		Mtpalpha	>tr|Q8IPE8|Q8IPE8_DROME Mitochondrial trifunctional protein alpha subunit, isoform B OS=Drosophila melanogaster GN=Mtpalpha PE=3 SV=1;>tr|Q9V397|Q9V397_DROME BcDNA.GH12558 OS=Drosophila melanogaster GN=Mtpalpha PE=2 SV=1	0	Both	new99	medium	Both	0.709794	1.80669	0	0	NA	NA	0	0	0	0	0	0	0	0	0	0	0	0	0	8.96	0	NA	15	9	35	32	5	27	8.27068	9.65834	7.83372	10.597	10.5806	9.84438	6.64744	7.23558	6.21048	8.19554	8.95737	8.22113
2037	Q9W0T7;Q8IRJ7		CG16940-RC	>tr|Q9W0T7|Q9W0T7_DROME CG16940, isoform A OS=Drosophila melanogaster GN=CG16940 PE=2 SV=2;>tr|Q8IRJ7|Q8IRJ7_DROME CG16940, isoform C OS=Drosophila melanogaster GN=CG16940-RC PE=2 SV=1	0	Both	known285	high	Both	52.567	1339.45	1	1	RNB	1	1	1	1	0	1	0	0	0	0	1	0	1	0	8.44	0	NA	15	4	11	36	10	1	7.19176	9.32204	7.7055	10.4498	8.40257	6.83794	5.4514	6.81	5.96514	7.94202	6.66221	5.09757
2040	Q8IRL9;Q9W2Z4;Q9VR50		CG2990-RB	>tr|Q8IRL9|Q8IRL9_DROME CG2990, isoform B OS=Drosophila melanogaster GN=CG2990-RB PE=2 SV=1;>tr|Q9W2Z4|Q9W2Z4_DROME CG2990, isoform C OS=Drosophila melanogaster GN=CG2990 PE=4 SV=2	0	Both	Rel_Homo_92	medium	Both	0.622713	4.39693	0	0	NA	NA	0	0	1	0	0	0	0	0	0	0	0	0	0	6.3	0	NA	2	1	17	2	0	1	6.30068	7.68296		7.67966	8.8256	6.75498	4.5525	5.29877		5.36749	7.0774	5.00681
2067	Q8MQJ9;M9MSJ1	Brain tumor protein	brat	>sp|Q8MQJ9|BRAT_DROME Brain tumor protein OS=Drosophila melanogaster GN=brat PE=1 SV=2;>tr|M9MSJ1|M9MSJ1_DROME Brain tumor, isoform E OS=Drosophila melanogaster GN=brat PE=4 SV=1	0	Both	Rel_Homo_92	high	Both	15.706	355.742	0	0	NA	NA	0	0	1	1	0	1	1	1	0	0	0	0	0	6.77	0	no	7	2	8	26	5	2	7.10941	9.14537	7.79763	10.889	8.76517	7.82068	5.61805	6.89695	6.30627	8.59798	7.27381	6.32932
2079	Q8MSB1		CG13638	>tr|Q8MSB1|Q8MSB1_DROME CG31357 OS=Drosophila melanogaster GN=CG13638 PE=2 SV=1	0	Both	new99	medium	Both	1.46457	2.97134	0	0	NA	NA	0	0	0	0	0	0	0	0	0	0	0	0	0	8.53	0	NA	3	0	10	8	0	3		8.25224		9.13935	8.97633	8.27768		6.24689		7.14594	7.65411	6.95546
2090	Q8MSW0		Aats-ile	>tr|Q8MSW0|Q8MSW0_DROME Isoleucyl-tRNA synthetase, isoform A OS=Drosophila melanogaster GN=Aats-ile PE=2 SV=1	0	Both	known285	low	Both	0.251097	1.55921	0	1	Anticodon_1;tRNA.synt_1	1;1	1	1	1	0	1	0	0	0	0	0	1	1	0	7.3	0	NA	7	2	65	5	3	9	6.78921	8.82037	7.43244	8.72828	10.2633	8.17687	4.96966	6.27068	5.61289	6.26776	8.44376	6.35732
2098	Q8MZI3;Q7KU78			>tr|Q8MZI3|Q8MZI3_DROME CG10077, isoform A OS=Drosophila melanogaster GN=CG10077 PE=2 SV=1;>tr|Q7KU78|Q7KU78_DROME CG10077, isoform C OS=Drosophila melanogaster GN=CG10077 PE=4 SV=1	0	Both	known285	high	Both	172.169	460.039	0	1	DEAD	1	1	1	1	1	1	1	1	1	1	0	1	1	0	9.42	0	NA	27	2	18	33	21	9	7.08415	10.7587	8.92274	11.748	9.20507	8.50497	5.4821	8.26604	7.32069	9.28323	7.60301	6.90291
2101	Q8SWR8;Q8SWR8-2;Q8SWR8-3	Ataxin-2 homolog	Atx2	>sp|Q8SWR8|ATX2_DROME Ataxin-2 homolog OS=Drosophila melanogaster GN=Atx2 PE=1 SV=1;>sp|Q8SWR8-2|ATX2_DROME Isoform A of Ataxin-2 homolog OS=Drosophila melanogaster GN=Atx2;>sp|Q8SWR8-3|ATX2_DROME Isoform C of Ataxin-2 homolog OS=Drosophila melanogaster GN	0	Both	known285	medium	Both	3.45938	0.866029	0	1	LsmAD;PAM2;SM.ATX	1;1;1	1	1	0	1	1	1	1	1	1	0	0	1	1	8.99	0	NA	6	1	11	8	0	15	6.09058	9.14886		9.928	9.42545	9.54386	4.62817	6.92912		7.73652	7.96305	8.08146
2102	Q8SWT2			>tr|Q8SWT2|Q8SWT2_DROME CG9323, isoform A OS=Drosophila melanogaster GN=CG9323 PE=2 SV=1	0	Both	known285	high	365nm (X490) unique	118.939	YW whole not available	1	1	DEAD;HA2	1;1	1	1	1	1	1	1	1	1	0	0	1	1	1	8.73	0	NA	5	0	2	23	0	0		8.84		9.93591	7.60583			6.42698		7.52501	5.92458
2123	Q8SXM8;Q9W327	Lysine--tRNA ligase	Aats-lys	>tr|Q8SXM8|Q8SXM8_DROME Lysine--tRNA ligase OS=Drosophila melanogaster GN=Aats-lys PE=2 SV=1;>tr|Q9W327|Q9W327_DROME Lysine--tRNA ligase OS=Drosophila melanogaster GN=Aats-lys PE=2 SV=2	0	Both	known285	low	Both	0.201697	0.109582	0	1	tRNA_anti.codon;tRNA.synt_2	1;1	1	1	1	0	1	0	0	0	0	0	1	1	1	6.09	0	NA	4	3	30	10	1	22	7.41338	8.51989	0	9.08311	10.0829	9.65879	5.95098	6.35222		6.95366	8.62045	8.1964
2147	Q8SYP9		mRpS5	>tr|Q8SYP9|Q8SYP9_DROME Mitochondrial ribosomal protein S5, isoform A OS=Drosophila melanogaster GN=mRpS5 PE=2 SV=1	0	Both	known285	high	Both	7.11785	7375	1	1	Ribosomal_S5;Ribosomal_S5_C	1;1	1	1	1	1	0	1	1	1	1	0	0	0	0	10.21	1	NA	4	1	8	19	0	1	6.65036	8.90674		11.1803	8.89001	6.77392	5.30792	6.827		9.01678	7.54758	5.43149
2167	Q8T0L3		Uba1	>tr|Q8T0L3|Q8T0L3_DROME GH24511p OS=Drosophila melanogaster GN=Uba1 PE=2 SV=1	0	Both	Rel_Homo_92	low	Both	0.131044	0.844498	0	0	NA	NA	0	1	0	1	1	1	1	0	0	0	1	1	0	5.16	0	NA	7	3	61	27	4	42	7.62987	9.03309	7.66512	10.0079	10.7408	9.62884	5.9056	6.56107	5.94085	7.5487	9.01657	7.90457
2175	Q8T3V6;Q9VHC6		mRpL47	>tr|Q8T3V6|Q8T3V6_DROME AT29239p OS=Drosophila melanogaster GN=mRpL47 PE=2 SV=1;>tr|Q9VHC6|Q9VHC6_DROME Rlc1, isoform A OS=Drosophila melanogaster GN=mRpL47 PE=4 SV=2	0	Both	known285	high	Both	9.36243	559.643	0	1	MRP.L47	1	1	1	1	0	0	0	0	0	0	0	0	0	0	9.9	1	NA	6	1	7	23	6	6	7.45536	8.97239	8.52671	12.186	8.83118	8.82567	6.2249	6.9992	7.29627	10.0607	7.60073	7.59522
2185	Q8T8R1	CCHC-type zinc finger protein CG3800	CG3800	>sp|Q8T8R1|Y3800_DROME CCHC-type zinc finger protein CG3800 OS=Drosophila melanogaster GN=CG3800 PE=1 SV=1	Validated	Both	known285	high	Both	4.16108	36.092	0	1	zf.CCHC	6	1	1	0	1	1	1	1	1	1	0	1	1	1	9.04	0	NA	2	7	10	8	6	9	8.95562	10.1189	8.83581	11.7801	10.235	9.64003	7.91423	8.23985	7.79442	9.87358	9.19357	8.59864
2188	Q8WR53;Q7KRS7;A8JRI1;Q95UI6;Q8IMF8;Q7KES3;E1JJ45		heph	>tr|Q8WR53|Q8WR53_DROME Hephaestus OS=Drosophila melanogaster GN=heph PE=2 SV=1;>tr|Q7KRS7|Q7KRS7_DROME Hephaestus, isoform G OS=Drosophila melanogaster GN=heph PE=4 SV=1;>tr|A8JRI1|A8JRI1_DROME Hephaestus, isoform L OS=Drosophila melanogaster GN=heph PE=4	0	Both	known285	high	Both	88.9895	333.18	1	1	RRM_5;RRM_6	2;2	1	1	1	1	0	1	1	1	1	0	0	0	0	8.99	0	NA	15	3	12	27	3	10	7.56547	10.2369	7.3612	11.3769	9.01301	8.30123	6.24326	8.06722	6.03898	9.21922	7.69081	6.97901
2196	Q94523	Succinate dehydrogenase [ubiquinone] flavoprotein subunit, mitochondrial	SdhA	>sp|Q94523|DHSA_DROME Succinate dehydrogenase [ubiquinone] flavoprotein subunit, mitochondrial OS=Drosophila melanogaster GN=SdhA PE=2 SV=3	0	Both	new99	low	Both	0.0480781	0.0366872	0	0	NA	NA	0	0	0	0	0	0	0	0	0	0	0	0	0	6.18	0	NA	2	1	24	2	0	20	6.58809	7.75606		8.51891	10.005	9.61128	5.03177	5.55771		6.337	8.44869	8.05496
2205	Q94901	RNA-binding protein lark	lark	>sp|Q94901|LARK_DROME RNA-binding protein lark OS=Drosophila melanogaster GN=lark PE=1 SV=1	0	Both	known285	high	Both	17.8935	124.602	1	1	RRM_1;zf.CCHC	2;1	1	1	1	1	0	1	1	1	1	0	0	0	0	9.21	0	NA	11	5	17	34	9	9	7.71446	9.85145	8.35382	11.9774	9.35618	9.28477	6.35272	7.67422	6.99209	9.73609	7.99445	7.92303
2211	Q95RB1			>tr|Q95RB1|Q95RB1_DROME CG14641 OS=Drosophila melanogaster GN=CG14641 PE=2 SV=1	0	Both	known285	high	Both	2.32217	406.134	1	1	RRM_1	1	1	1	1	1	1	1	1	1	1	0	0	1	0	8.86	0	NA	2	1	9	15	0	1	6.31618	8.16887		10.0882	8.6997	7.02115	4.99396	6.17044		8.02514	7.37747	5.69894
2213	Q95RE4;M9NFR5		yps	>tr|Q95RE4|Q95RE4_DROME LD37574p OS=Drosophila melanogaster GN=yps PE=2 SV=1;>tr|M9NFR5|M9NFR5_DROME Ypsilon schachtel, isoform B OS=Drosophila melanogaster GN=yps PE=4 SV=1	0	Both	known285	high	Both	27.684	14.1741	1	1	CSD	1	1	1	1	1	0	1	1	1	1	0	0	0	0	9.84	0	no	15	13	16	29	14	22	8.85268	10.8523	9.26886	12.2457	10.0846	10.4773	7.64856	8.74981	8.06476	10.1422	8.88051	9.27321
2222	Q95RR6;F3YDK4		Pur-alpha;Pur-alpha-RD	>tr|Q95RR6|Q95RR6_DROME LD15002p OS=Drosophila melanogaster GN=Pur-alpha PE=2 SV=1;>tr|F3YDK4|F3YDK4_DROME Purine-rich binding protein-alpha, isoform G OS=Drosophila melanogaster GN=Pur-alpha PE=2 SV=1	0	Both	known285	high	Both	104.226	93.7593	0	1	PurA	1	1	1	1	1	0	1	1	1	1	0	0	0	0	8.36	0	yes	3	1	4	17	1	3	6.48823	8.56495	6.85941	10.2156	7.4109	7.77584	5.28411	6.65182	5.65529	8.26126	6.20677	6.57172
2247	Q9VHJ8;Q95U38		skap	>tr|Q9VHJ8|Q9VHJ8_DROME SkpA associated protein, isoform A OS=Drosophila melanogaster GN=skap PE=3 SV=2;>tr|Q95U38|Q95U38_DROME GH10480p OS=Drosophila melanogaster GN=skap PE=2 SV=1	0	Both	new99	low	Both	0.777579	0.0818328	0	0	NA	NA	0	0	0	0	0	0	0	0	0	1	0	0	0	8.82	0	NA	6	4	19	6	0	17	8.13938	9.21739		9.2482	10.1366	9.93857	6.75918	7.07416		7.18882	8.75634	8.55836
2250	Q95WY3		Nop56	>tr|Q95WY3|Q95WY3_DROME FI04781p OS=Drosophila melanogaster GN=Nop56 PE=2 SV=1	Validated	Both	known285	medium	Both	0.585685	4.4057	0	1	Nop;NOP5NT	1;1	1	1	0	1	1	1	1	1	1	1	1	1	1	9.31	0	NA	3	0	14	25	2	18		8.16406	7.38655	10.5287	9.2935	9.39396		6.14582	6.04415	8.41308	7.95108	8.05154
2251	Q960D3;Q9VBX3;D2A6L8		vig2	>tr|Q960D3|Q960D3_DROME SD06613p OS=Drosophila melanogaster GN=vig2 PE=2 SV=1;>tr|Q9VBX3|Q9VBX3_DROME Vig2, isoform B OS=Drosophila melanogaster GN=vig2 PE=1 SV=2	0	Both	known285	medium	Both	4.46681	1.92985	0	1	HABP4_PAI.RBP1	1	1	1	1	1	0	1	1	1	1	0	0	0	0	9.42	0	NA	8	7	26	25	1	28	7.80799	10.0051	7.15314	11.3442	10.0998	10.5081	6.60388	7.97278	5.94902	9.30703	8.89571	9.30397
2269	Q961R8;Q9VUK8		Aats-gly	>tr|Q961R8|Q961R8_DROME GH09263p OS=Drosophila melanogaster GN=Aats-gly PE=2 SV=1;>tr|Q9VUK8|Q9VUK8_DROME FI18749p1 OS=Drosophila melanogaster GN=Aats-gly PE=2 SV=1	0	Both	known285	low	Both	0.0764732	0.0354315	0	1	HGTP_anticodon;tRNA.synt_2b	1;1	1	1	1	0	1	0	0	0	0	0	1	0	0	6.02	0	NA	4	2	35	5	0	32	7.06644	8.34227		8.7006	10.3411	9.79472	5.51014	6.09538		6.50534	8.7848	8.23842
2275	Q9GU68	Eukaryotic translation initiation factor 5A	eIF-5A	>sp|Q9GU68|IF5A_DROME Eukaryotic translation initiation factor 5A OS=Drosophila melanogaster GN=eIF-5A PE=2 SV=2	0	Both	known285	low	Both	0.21183	0.0368069	1	1	eIF.5a	1	1	1	1	1	1	0	1	0	1	1	1	1	0	4.98	0	NA	6	4	15	9	6	18	7.95215	8.97708	7.88996	9.64477	10.4809	10.653	6.91076	7.19257	6.84856	7.89507	9.43951	9.61162
2280	Q9I7D3	Caprin homolog	Capr	>sp|Q9I7D3|CAPR1_DROME Caprin homolog OS=Drosophila melanogaster GN=Capr PE=1 SV=1	0	Both	known285	medium	Both	10.8875	1.18933	1	0	NA	NA	1	1	1	1	0	1	1	1	1	0	0	0	0	6.07	0	NA	18	10	26	27	10	27	8.34918	10.6738	8.60442	11.3978	10.3262	10.768	6.80511	8.24613	7.06036	9.01674	8.78213	9.22391
2290	Q9I7M2	GTP-binding protein 10 homolog	CG10628	>sp|Q9I7M2|GTPBA_DROME GTP-binding protein 10 homolog OS=Drosophila melanogaster GN=CG10628 PE=2 SV=2	0	Both	known285	high	Both	4.21368	50.8595	0	1	MMR_HSR1	1	1	1	1	1	0	1	0	0	0	0	0	0	0	9.5	0	NA	5	0	7	13	1	5		8.71682	6.28992	10.438	8.9435	8.24753		6.69421	4.9889	8.3704	7.64247	6.9465
2297	Q9I7T7-2;Q9I7T7;Q9I7T7-3	La-related protein CG11505	CG11505	>sp|Q9I7T7-2|Y1505_DROME Isoform A of La-related protein CG11505 OS=Drosophila melanogaster GN=CG11505;>sp|Q9I7T7|Y1505_DROME La-related protein CG11505 OS=Drosophila melanogaster GN=CG11505 PE=1 SV=2;>sp|Q9I7T7-3|Y1505_DROME Isoform C of La-related protei	0	Both	known285	high	Both	2.60215	18.2117	1	1	La	1	1	1	1	1	0	1	1	1	1	0	0	0	0	8.85	0	NA	4	1	5	18	2	5	0	7.86826	6.68131	9.85469	8.37453	8.15311		5.68545	5.14983	7.59951	6.84304	6.62163
2301	Q9I7Z8			>tr|Q9I7Z8|Q9I7Z8_DROME CG18273 OS=Drosophila melanogaster GN=CG18273 PE=2 SV=3	0	Both	known285	high	365nm (X490) unique	17.3003	YW whole not available	0	1	Urb2	1	1	0	0	0	0	0	0	0	0	0	0	0	0	7.71	0	NA	7	0	4	10	0	0		8.35704		9.12728	8.00009			5.77315		6.56489	6.10802
2307	Q9NFU0-2;Q9NFU0-3;Q9NFU0-4			>sp|Q9NFU0-2|FMR1_DROME Isoform C of Fragile X mental retardation syndrome-related protein 1 OS=Drosophila melanogaster GN=Fmr1;>sp|Q9NFU0-3|FMR1_DROME Isoform E of Fragile X mental retardation syndrome-related protein 1 OS=Drosophila melanogaster GN=Fmr1;	0	Both	known285	high	Both	36.6809	43.4762	1	1	KH_1	2	1	1	1	1	0	1	1	1	1	0	0	0	0	8.4	0	NA	26	5	25	28	18	20	8.12804	11.0233	8.80696	11.8246	10.1193	9.60047	6.53696	8.51971	7.2159	9.36519	8.5282	8.00941
2308	Q9NG60		ligatin	>tr|Q9NG60|Q9NG60_DROME LD24540p OS=Drosophila melanogaster GN=ligatin PE=2 SV=1	0	Both	known285	low	Both	0.765136	0.370553	1	1	SUI1	1	1	1	1	1	1	0	0	1	1	0	0	1	0	8.57	0	NA	2	0	10	6	0	9		7.58456		8.62228	8.64589	8.70269		5.50955		6.54192	7.19874	7.25554
2309	Q9NG98	DNA topoisomerase 3-alpha	Top3alpha	>sp|Q9NG98|TOP3A_DROME DNA topoisomerase 3-alpha OS=Drosophila melanogaster GN=Top3alpha PE=2 SV=2	0	Both	new99	high	Both	188.849	1611.25	0	0	NA	NA	0	0	0	0	0	0	0	0	0	0	0	0	0	8.62	0	no	4	3	1	41	45	1	7.18636	8.51711	9.56438	10.6031	7.10887	6.89974	5.34128	5.96697	7.71929	7.97934	5.26378	5.05465
2313	Q9NJH0	Elongation factor 1-gamma	Ef1gamma	>sp|Q9NJH0|EF1G_DROME Elongation factor 1-gamma OS=Drosophila melanogaster GN=Ef1gamma PE=2 SV=2	0	Both	known285	low	Both	0.133565	0.144563	1	1	EF1G	1	1	1	1	0	1	0	0	0	1	0	1	1	0	6.71	0	NA	5	6	30	18	3	28	8.04029	9.15548	7.59969	10.286	10.8448	10.653	6.67855	7.03587	6.23797	8.16891	9.4831	9.29132
2316	Q9TVM2	Exportin-1	emb	>sp|Q9TVM2|XPO1_DROME Exportin-1 OS=Drosophila melanogaster GN=emb PE=1 SV=1	0	Both	known285	low	Both	0.455286	0.654085	0	1	CRM1_C;IBN_N;Xpo1	1;1;1	1	1	1	0	1	0	0	0	1	0	1	0	0	5.58	0	NA	8	5	49	7	0	15	7.59822	8.806		8.70534	9.99169	8.53288	5.85786	6.33668		6.32568	8.25132	6.79252
2318	Q9U1H9	Nuclear RNA export factor 1	sbr	>sp|Q9U1H9|NXF1_DROME Nuclear RNA export factor 1 OS=Drosophila melanogaster GN=sbr PE=1 SV=2	0	Both	known285	high	Both	3.76928	70.6372	1	1	NTF2;TAP_C;Tap.RNA_bind	1;1;1	1	1	1	1	0	1	1	1	1	1	0	0	0	9.13	0	NA	2	1	7	8	0	1	6.44386	8.02185		9.21192	8.35447	6.96882	4.9525	5.86645		7.04403	6.86311	5.47747
2335	Q9U9Q4	Eukaryotic translation initiation factor 3 subunit H	eIF-3p40	>sp|Q9U9Q4|EIF3H_DROME Eukaryotic translation initiation factor 3 subunit H OS=Drosophila melanogaster GN=eIF-3p40 PE=2 SV=2	0	Both	known285	medium	Both	0.900926	2.36296	1	0	NA	NA	1	1	1	1	0	1	0	1	0	1	0	0	0	5.74	0	NA	5	2	16	17	3	17	7.58483	8.95685	7.29203	10.5645	9.83363	9.6977	6.3807	7.01127	6.08792	8.58457	8.62951	8.49358
2339	Q9V3A7	Structural maintenance of chromosomes protein	glu	>tr|Q9V3A7|Q9V3A7_DROME Structural maintenance of chromosomes protein OS=Drosophila melanogaster GN=glu PE=2 SV=1	0	Both	new99	medium	Both	0.307155	18.8717	0	0	NA	NA	0	0	0	0	0	0	0	0	0	0	0	0	0	5.9	0	NA	2	0	24	7	0	1		7.59969		8.68489	9.05618	7.05377		5.10728		6.18378	7.19285	5.19044
2345	Q9V3D0		mRpL4	>tr|Q9V3D0|Q9V3D0_DROME LD33485p OS=Drosophila melanogaster GN=mRpL4 PE=2 SV=1	0	Both	known285	high	Both	1.16585	43.6712	0	1	Ribosomal_L4	1	1	1	1	1	0	1	1	1	0	0	0	0	0	9.26	1	NA	4	0	12	11	0	7		8.26822		10.8862	9.09008	8.72903		6.43766		8.94062	7.94394	7.58289
2353	Q9V3E7		Ref1	>tr|Q9V3E7|Q9V3E7_DROME Aly OS=Drosophila melanogaster GN=Ref1 PE=2 SV=1	0	Both	known285	medium	Both	11.8364	1.74849	1	1	RRM_1	1	1	1	1	1	0	1	1	1	1	0	0	0	0	10.55	0	no	7	0	9	19	2	13		9.27924	7.24694	10.6446	9.01081	9.90268		7.25583	5.99168	8.60759	7.75553	8.6474
2375	Q9V3P6;Q9V3P6-2	26S proteasome non-ATPase regulatory subunit 1	Rpn2	>sp|Q9V3P6|PSMD1_DROME 26S proteasome non-ATPase regulatory subunit 1 OS=Drosophila melanogaster GN=Rpn2 PE=1 SV=1;>sp|Q9V3P6-2|PSMD1_DROME Isoform B of 26S proteasome non-ATPase regulatory subunit 1 OS=Drosophila melanogaster GN=Rpn2	0	Both	new99	low	Both	0.0471069	0.101819	0	0	NA	NA	0	0	0	0	1	0	0	0	0	1	1	0	0	5.07	0	NA	4	3	50	16	3	43	7.158	8.37116	6.75414	9.58332	10.578	10.1541	5.44201	5.96219	5.03814	7.16352	8.86204	8.43816
2379	Q9V3T8;Q7KTD2		SC35	>tr|Q9V3T8|Q9V3T8_DROME LD32469p OS=Drosophila melanogaster GN=SC35 PE=2 SV=1	0	Both	known285	high	Both	41.1494	9.57581	0	1	RRM_1	1	1	1	0	1	0	1	1	1	1	0	0	0	0	11.75	0	NA	4	2	3	8	2	7	6.96554	9.3761	7.4142	10.4931	8.5585	9.02375	6.01127	7.64571	6.45997	8.76822	7.60427	8.06952
2381	Q9V3U6		26-29-p	>tr|Q9V3U6|Q9V3U6_DROME 26-29kD-proteinase OS=Drosophila melanogaster GN=26-29-p PE=2 SV=1	0	Both	new99	low	Both	0.0356315	0.0316865	0	0	NA	NA	0	0	0	0	0	0	0	0	0	0	0	0	0	6.26	0	NA	2	1	27	6	3	25	7.35635	8.45973	7.68743	9.54366	10.7805	10.6244	5.94139	6.34447	6.27247	7.42781	9.36556	9.20941
2388	Q9V3W7		SF2	>tr|Q9V3W7|Q9V3W7_DROME LD40489p OS=Drosophila melanogaster GN=SF2 PE=2 SV=1	0	Both	known285	high	Both	31.1805	6.28251	1	1	RRM_1	2	1	1	1	1	1	1	1	1	1	1	1	1	1	9.92	0	NA	11	4	14	17	9	14	8.09576	10.6241	8.55553	11.4014	9.8237	10.0484	6.94964	8.59853	7.40941	9.41794	8.67757	8.90227
2403	Q9V414		Smg5	>tr|Q9V414|Q9V414_DROME LD36341p OS=Drosophila melanogaster GN=Smg5 PE=2 SV=1	0	Both	known285	high	Both	X490 whole not available	20.8276	0	1	EST1;EST1_DNA_bind;PIN_4	1;1;1	1	1	1	0	0	0	0	0	0	0	0	0	0	7.26	0	NA	2	0	1	17	3	3		8.11347	7.31758	9.50746		7.77311		5.67842	5.55416	7.04583		6.00966
2406	Q9V426		vig	>tr|Q9V426|Q9V426_DROME LD07162p OS=Drosophila melanogaster GN=vig PE=2 SV=1	0	Both	known285	high	Both	14.8941	7.15248	1	1	HABP4_PAI.RBP1	1	1	1	1	1	0	1	1	1	1	0	0	0	0	9.74	0	NA	3	0	9	16	0	12		8.87898		10.3136	8.54389	8.98422		6.729		8.14123	7.12892	7.56925
2409	Q9V431	Apoptosis inhibitor 5 homolog	Aac11	>sp|Q9V431|API5_DROME Apoptosis inhibitor 5 homolog OS=Drosophila melanogaster GN=Aac11 PE=2 SV=1	Validated	Both	Rel_Homo_92	medium	Both	2.7314	4.28834	0	0	NA	NA	0	1	0	1	0	1	1	1	1	0	0	0	0	6.31	0	NA	7	1	17	24	0	14	6.3297	8.77916		10.2215	9.18898	9.121	4.86731	6.59004		8.00843	7.72658	7.65861
2419	Q9V460;Q9V460-2	Transcription elongation factor SPT5	Spt5	>sp|Q9V460|SPT5H_DROME Transcription elongation factor SPT5 OS=Drosophila melanogaster GN=Spt5 PE=1 SV=1;>sp|Q9V460-2|SPT5H_DROME Isoform B of Transcription elongation factor SPT5 OS=Drosophila melanogaster GN=Spt5	0	Both	known285	low	Both	0.8466	0.130802	0	1	KOW	1	1	1	1	1	1	1	1	1	0	0	1	1	1	5.88	0	maybe	3	0	13	2	1	11		7.98161	6.45681	8.21306	8.96615	8.77575		5.62192	4.75784	5.91093	7.26717	7.07679
2421	Q9V463;Q9VKL5		Nup154	>tr|Q9V463|Q9V463_DROME Nucleoporin 154, isoform A OS=Drosophila melanogaster GN=Nup154 PE=2 SV=1;>tr|Q9VKL5|Q9VKL5_DROME Nucleoporin 154, isoform B OS=Drosophila melanogaster GN=Nup154 PE=4 SV=2	0	Both	new99	medium	Both	0.721777	10.2034	0	0	NA	NA	0	0	0	0	1	0	0	0	0	0	1	0	0	6.12	0	NA	5	2	37	7	0	4	6.93289	8.4164		9.01215	9.43422	7.62404	5.10037	5.88718		6.5178	7.6017	5.79153
2433	Q9V4M2	Protein wech	wech	>sp|Q9V4M2|WECH_DROME Protein wech OS=Drosophila melanogaster GN=wech PE=1 SV=2	not_confirmed	Both	Rel_Homo_92	medium	Both	2.36533	13.5998	0	0	NA	NA	0	1	0	1	0	0	0	1	1	0	0	0	0	6.05	0	NA	2	1	12	21	1	7	6.75248	8.25548	6.15051	10.0539	8.77114	8.46453	5.16143	5.98103	4.55944	7.72454	7.18007	6.87348
2464	Q9V7N5-2;Q9V7N5-3;Q9V7N5;B7YZI0	V-type proton ATPase subunit C	Vha44	>sp|Q9V7N5-2|VATC_DROME Isoform A of V-type proton ATPase subunit C OS=Drosophila melanogaster GN=Vha44;>sp|Q9V7N5-3|VATC_DROME Isoform C of V-type proton ATPase subunit C OS=Drosophila melanogaster GN=Vha44;>sp|Q9V7N5|VATC_DROME V-type proton ATPase subun	0	Both	new99	low	Both	0.114617	0.00574921	0	0	NA	NA	0	0	0	0	1	0	0	0	0	1	1	1	0	7.28	0	NA	2	1	26	2	0	26	6.46827	7.92073		7.91085	9.77874	9.85274	5.07033	5.86711		5.93194	8.38079	8.4548
2478	Q9V9E3	Presequence protease, mitochondrial	CG3107	>sp|Q9V9E3|PREP_DROME Presequence protease, mitochondrial OS=Drosophila melanogaster GN=CG3107 PE=2 SV=2	0	Both	new99	high	Both	0.913802	161.051	0	0	NA	NA	0	0	0	0	0	0	0	0	0	0	0	0	0	6.04	0	NA	6	0	27	19	1	2		8.398	0	9.67422	9.3149	7.0393		5.97042		7.23137	7.5825	5.30688
2480	Q9V9K7	Serrate RNA effector molecule homolog	Ars2	>sp|Q9V9K7|SRRT_DROME Serrate RNA effector molecule homolog OS=Drosophila melanogaster GN=Ars2 PE=1 SV=2	0	Both	known285	medium	Both	1.50678	0.780717	0	1	ARS2	1	1	1	1	1	0	1	1	1	1	1	0	0	0	5.39	0	NA	5	0	18	18	0	24		8.27185		9.57063	8.98198	9.25777		5.84675		7.12743	7.24162	7.51741
2494	Q9V9V7		pasha	>tr|Q9V9V7|Q9V9V7_DROME LD23072p OS=Drosophila melanogaster GN=pasha PE=2 SV=1	0	Both	known285	high	365nm (X490) unique	69.2336	YW whole not available	1	1	dsrm	1	1	1	1	0	0	0	0	0	0	0	0	0	0	5.62	0	NA	8	1	2	16	6	0	6.43457	8.78313	7.221	9.93105	7.78868		4.94321	6.56471	5.72964	7.71037	6.29732
2517	Q9VA91;Q8IMI7	40S ribosomal protein S7	RpS7	>sp|Q9VA91|RS7_DROME 40S ribosomal protein S7 OS=Drosophila melanogaster GN=RpS7 PE=1 SV=1;>tr|Q8IMI7|Q8IMI7_DROME GM06992p OS=Drosophila melanogaster GN=RpS7 PE=2 SV=1	0	Both	known285	medium	Both	2.08155	0.53002	0	1	Ribosomal_S7e	1	1	1	1	1	1	1	1	1	1	1	1	1	0	9.81	1	NA	11	9	24	14	6	22	8.79003	10.4319	8.13504	10.8762	10.8229	10.6356	7.74864	8.52697	7.09367	9.03607	9.78151	9.59425
2522	Q9VAC1;Q8IMJ8			>tr|Q9VAC1|Q9VAC1_DROME CG7920, isoform A OS=Drosophila melanogaster GN=CG7920 PE=2 SV=1	0	Both	new99	low	Both	0.252406	0.189087	0	0	NA	NA	0	0	0	0	0	0	0	0	0	0	0	0	0	8.29	0	NA	5	1	20	7	0	19	7.01077	8.83282		9.07491	10.2725	9.41424	5.61284	6.70371		7.01051	8.87454	8.01632
2552	Q9VAQ0		Cul-5	>tr|Q9VAQ0|Q9VAQ0_DROME Cullin-5 OS=Drosophila melanogaster GN=Cul-5 PE=2 SV=1	0	Both	new99	high	Both	0.714762	235.303	0	0	NA	NA	0	0	0	0	1	0	0	0	0	0	0	1	0	8.49	0	NA	2	0	13	4	0	2		7.69958		10.612	8.78095	7.74349		5.3901		8.16056	7.10887	6.0714
2558	Q9VAV2			>tr|Q9VAV2|Q9VAV2_DROME CG12413 OS=Drosophila melanogaster GN=CG12413-RA PE=2 SV=2	0	Both	known285	medium	Both	0.994495	9.46356	0	1	GTP_EFTU;IF.2	1;1	1	1	1	1	0	1	0	1	0	0	0	0	0	6.67	0	NA	2	0	12	12	0	6		7.54139		9.17384	8.49244	7.80656		5.30434		6.88735	6.87966	6.19376
2559	Q9VAW5;Q9VAW5-1	La-related protein	larp	>sp|Q9VAW5|LARP_DROME La-related protein OS=Drosophila melanogaster GN=larp PE=1 SV=5;>sp|Q9VAW5-1|LARP_DROME Isoform C of La-related protein OS=Drosophila melanogaster GN=larp	0	Both	known285	high	Both	26.3748	51.3878	1	1	La	1	1	1	1	1	0	1	1	1	1	0	0	0	0	9.61	0	NA	23	8	30	55	34	34	8.17322	10.3378	9.32309	11.9471	9.63377	9.64132	6.36029	7.66912	7.51018	9.25679	7.82086	7.8284
2569	Q9VB05		ALiX	>tr|Q9VB05|Q9VB05_DROME ALG-2 interacting protein X OS=Drosophila melanogaster GN=ALiX PE=1 SV=1	0	Both	new99	low	Both	0.164118	0.0434331	0	0	NA	NA	0	0	0	0	0	0	0	0	0	1	0	0	0	5.34	0	NA	2	1	33	4	0	29	6.76353	8.14181		8.49712	9.82559	9.51775	5.18375	5.88804		6.29332	8.24581	7.93797
2596	Q9VBK9			>tr|Q9VBK9|Q9VBK9_DROME CG5913 OS=Drosophila melanogaster GN=CG5913 PE=4 SV=1	0	Both	known285	medium	Both	2.00415	2.66815	0	1	DUF2465	1	1	1	0	1	0	1	1	1	1	0	0	0	0	9.72	0	NA	3	0	11	11	0	12		8.34492		9.53825	8.92514	8.69403		6.27393		7.45756	7.54492	7.31383
2602	Q9VBP9-2;Q9VBP9	Nuclear protein localization protein 4 homolog	CG4673	>sp|Q9VBP9-2|NPL4_DROME Isoform B of Nuclear protein localization protein 4 homolog OS=Drosophila melanogaster GN=Npl4;>sp|Q9VBP9|NPL4_DROME Nuclear protein localization protein 4 homolog OS=Drosophila melanogaster GN=Npl4 PE=1 SV=3	0	Both	new99	low	Both	0.251331	0.0512263	0	0	NA	NA	0	0	0	0	0	0	0	0	0	0	0	0	0	6.85	0	NA	2	0	24	2	0	19		8.19639		8.17573	9.69059	9.14829		5.97382		6.03125	8.1465	7.60423
2603	Q9VBQ1;Q8IMS8		msi	>tr|Q9VBQ1|Q9VBQ1_DROME LD31631p OS=Drosophila melanogaster GN=msi PE=2 SV=2;>tr|Q8IMS8|Q8IMS8_DROME FI20028p1 OS=Drosophila melanogaster GN=msi PE=2 SV=2	0	Both	known285	high	Both	21.8819	217.501	1	1	RRM_1	2	1	0	1	0	0	0	0	0	0	0	0	0	0	9.02	0	NA	7	2	10	23	4	9	7.11531	9.40021	7.99678	11.5019	8.85489	8.60217	5.88487	7.39161	6.76634	9.42672	7.62445	7.37173
2606	Q9VBR0			>tr|Q9VBR0|Q9VBR0_DROME CG4553 OS=Drosophila melanogaster GN=CG4553 PE=2 SV=1	0	Both	new99	medium	Both	3.98085	3.14091	0	0	NA	NA	0	0	0	0	0	0	0	0	0	0	0	0	0	9.13	0	yes	2	0	3	14	0	8		7.29656		9.6001	7.66552	8.6805		5.46211		7.66463	6.43506	7.45005
2612	Q9VBU7		Nup358	>tr|Q9VBU7|Q9VBU7_DROME Nup358 OS=Drosophila melanogaster GN=Nup358 PE=4 SV=2	0	Both	known285	low	Both	0.306973	0.383554	0	1	zf.RanBP	2	1	1	0	1	1	1	1	1	0	0	1	1	1	5.76	0	NA	7	5	69	26	8	50	7.64469	8.98342	8.10343	10.1359	10.3256	10.0902	5.58399	6.17906	6.04273	7.33086	8.26489	8.02951
2614	Q9VBU9	40S ribosomal protein S27	RpS27	>tr|Q9VBU9|Q9VBU9_DROME 40S ribosomal protein S27 OS=Drosophila melanogaster GN=RpS27 PE=1 SV=1	0	Both	known285	low	Both	0.410825	0.33817	0	1	Ribosomal_S27e	1	1	1	1	1	1	0	1	1	1	1	1	1	0	9.65	1	NA	2	3	4	3	2	4	7.39947	8.98364	7.41712	9.72266	10.1992	9.762	6.79741	7.63791	6.81507	8.40659	9.59718	9.15993
2627	Q9VC18			>tr|Q9VC18|Q9VC18_DROME CG11089 OS=Drosophila melanogaster GN=CG11089 PE=2 SV=1	0	Both	new99	low	Both	0.035791	0.0524136	0	0	NA	NA	0	0	0	0	1	0	0	0	0	0	1	0	0	7.97	0	NA	2	1	33	4	1	27	6.38126	7.55263	6.32406	8.43861	9.94658	9.38193	4.86274	5.40892	4.80553	6.30038	8.42807	7.86341
2631	Q9VC48	Methionine aminopeptidase		>tr|Q9VC48|Q9VC48_DROME Methionine aminopeptidase OS=Drosophila melanogaster GN=CG13630 PE=2 SV=1	0	Both	Rel_Homo_92	low	Both	0.201784	0.0466783	0	0	NA	NA	0	0	1	0	0	0	0	0	0	0	0	0	0	6.46	0	NA	3	0	19	2	0	11		7.97784		7.4393	9.58549	8.50634		5.95572		5.53125	8.22376	7.14461
2643	Q9VC94			>tr|Q9VC94|Q9VC94_DROME CG5728 OS=Drosophila melanogaster GN=CG5728 PE=2 SV=2	0	Both	known285	high	Both	1.09069	61.4313	1	1	S1;Suf	1;1	1	1	1	1	1	1	0	0	1	0	1	1	1	8.72	0	NA	3	1	18	29	6	2	6.18792	8.15602	7.26813	9.87501	9.01611	7.64389	4.33664	5.6296	5.41689	7.29855	7.16483	5.79263
2647	Q9VCA8	Ankyrin repeat and KH domain-containing protein mask	mask	>sp|Q9VCA8|ANKHM_DROME Ankyrin repeat and KH domain-containing protein mask OS=Drosophila melanogaster GN=mask PE=1 SV=2	0	Both	known285	medium	Both	1.9346	1.25362	1	1	KH_1	1	1	1	1	1	0	1	0	1	1	0	0	0	0	5.42	0	NA	8	1	34	20	3	31	6.3853	8.82599	7.02032	9.78764	9.38173	9.25314	4.28149	5.99157	4.91652	6.96504	7.27791	7.14934
2671	Q9VCH8		tst	>tr|Q9VCH8|Q9VCH8_DROME LD23303p OS=Drosophila melanogaster GN=tst PE=2 SV=2	0	Both	known285	medium	Both	2.88279	10.1326	0	1	DEAD;rRNA_proc.arch	1;1	1	1	1	0	1	0	0	0	0	0	0	1	1	6.57	0	NA	3	1	19	13	0	1	6.47894	8.37255		9.23966	8.79258	7.83784	4.65286	5.85339		6.73503	6.96651	6.01178
2676	Q9VCK0	Eukaryotic translation initiation factor 3 subunit D-1	eIF-3p66	>sp|Q9VCK0|EI3D1_DROME Eukaryotic translation initiation factor 3 subunit D-1 OS=Drosophila melanogaster GN=eIF-3p66 PE=1 SV=1	0	Both	known285	high	Both	8.08069	47.218	1	1	eIF.3_zeta	1	1	1	1	1	0	1	1	1	1	1	0	0	0	6.56	0	NA	14	2	23	30	11	17	7.75724	10.1465	8.23739	11.6308	9.97209	9.38496	6.32586	7.87525	6.80602	9.34524	8.54073	7.9536
2691	Q9VCU9	Endoribonuclease Dcr-1	Dcr-1	>sp|Q9VCU9|DCR1_DROME Endoribonuclease Dcr-1 OS=Drosophila melanogaster GN=Dcr-1 PE=1 SV=1	0	Both	known285	high	365nm (X490) unique	1205.67	YW whole not available	1	1	Ribonuclease_3;PAZ	2;1	1	1	1	0	0	0	0	0	0	0	0	0	0	5.46	0	NA	35	4	5	57	28	0	7.22873	10.3489	8.61704	10.4319	7.98388		5.20755	7.471	6.59585	7.64463	5.9627
2697	Q9VCX3	Probable 39S ribosomal protein L45, mitochondrial	mRpL45	>sp|Q9VCX3|RM45_DROME Probable 39S ribosomal protein L45, mitochondrial OS=Drosophila melanogaster GN=mRpL45 PE=2 SV=1	0	Both	Rel_Homo_92	high	Both	1.00578	105.763	0	0	NA	NA	0	1	1	0	0	0	0	0	0	1	0	0	0	9.27	1	NA	4	0	13	26	2	12		8.2932	6.57552	11.8933	9.17713	9.278		6.35143	5.32025	9.76458	7.92185	8.02272
2699	Q9VCX7			>tr|Q9VCX7|Q9VCX7_DROME CG31156 OS=Drosophila melanogaster GN=CG31156 PE=2 SV=3	0	Both	known285	high	365nm (X490) unique	46.6985	YW whole not available	1	1	S1	1	1	1	1	0	0	0	0	0	0	0	0	0	0	9.02	0	NA	5	0	3	35	20	0		8.37785	8.51854	10.6949	7.58798			6.00312	6.8373	8.22822	5.90674
2704	Q9VD07			>tr|Q9VD07|Q9VD07_DROME CG12499 OS=Drosophila melanogaster GN=CG12499 PE=4 SV=2	0	Both	known285	high	365nm (X490) unique	42.8272	YW whole not available	0	1	Npa1	1	1	1	0	1	0	1	1	1	1	0	0	0	0	6.31	0	NA	6	1	7	22	0	0	6.43503	8.64189		9.60413	7.86772		4.37057	5.86206		6.83436	5.80327
2706	Q9VD14			>tr|Q9VD14|Q9VD14_DROME CG13850 OS=Drosophila melanogaster GN=CG13850 PE=2 SV=3	0	Both	Rel_Homo_92	high	Both	5.48656	125.225	0	0	NA	NA	0	1	0	1	0	1	1	1	1	0	0	0	0	9.2	0	NA	7	1	14	30	5	12	6.84061	9.02166	7.83103	11.3902	9.10846	8.73853	5.33546	6.7697	6.32588	9.0486	7.60333	7.23338
2716	Q9VD58			>tr|Q9VD58|Q9VD58_DROME CG6439, isoform A OS=Drosophila melanogaster GN=CG6439 PE=2 SV=1	0	Both	new99	low	Both	0.409584	0.0478365	0	0	NA	NA	0	0	0	0	1	0	0	0	0	1	1	0	0	8.76	0	NA	4	1	16	3	0	13	7.13663	8.65044		8.42546	9.89494	9.40944	5.88136	6.67908		6.55144	8.63967	8.15415
2727	Q9VDE3		slmb	>tr|Q9VDE3|Q9VDE3_DROME LD08669p OS=Drosophila melanogaster GN=slmb PE=2 SV=1	Validated	Both	Rel_Homo_92	high	Both	1.13774	250.564	0	0	NA	NA	0	0	1	0	0	0	0	0	0	0	0	0	0	7.57	0	NA	5	1	17	13	0	1	6.78945	8.55653		9.5073	9.36511	6.69265	5.3423	6.40107		7.36194	7.91796	5.24549
2740	Q9VDK7	Signal recognition particle subunit SRP72	Srp72	>tr|Q9VDK7|Q9VDK7_DROME Signal recognition particle subunit SRP72 OS=Drosophila melanogaster GN=Srp72 PE=2 SV=1	0	Both	known285	medium	Both	0.697606	1.47847	1	1	SRP72	1	1	1	1	1	0	1	1	1	0	1	0	0	0	9.15	0	NA	6	1	22	9	0	9	6.2796	8.53092		9.01972	9.55405	8.46997	4.72329	6.26844		6.80101	7.99775	6.91367
2786	Q9VEB1		Mdh2	>tr|Q9VEB1|Q9VEB1_DROME CG7998 OS=Drosophila melanogaster GN=Mdh2 PE=2 SV=1	0	Both	Rel_Homo_92	low	Both	0.0792884	0.18616	0	0	NA	NA	0	0	0	1	1	1	1	1	0	0	1	0	0	9.2	0	NA	3	2	19	15	5	18	7.28106	8.67777	8.10278	10.1561	10.6332	10.4228	6.0023	6.68068	6.82402	8.13149	9.3544	9.14408
2807	Q9VEN6		mRpS11	>tr|Q9VEN6|Q9VEN6_DROME Mitochondrial ribosomal protein S11 OS=Drosophila melanogaster GN=mRpS11 PE=2 SV=1	0	Both	known285	high	Both	3.94973	26.5913	0	1	Ribosomal_S11	1	1	1	1	1	0	1	1	1	0	0	0	0	0	10.53	1	NA	2	0	5	8	0	2		8.50739		9.46452	8.7795	7.62719		6.72396		7.69028	7.70032	6.54801
2808	Q9VEN9		Patr-1	>tr|Q9VEN9|Q9VEN9_DROME Protein associated with topo II related-1 OS=Drosophila melanogaster GN=Patr-1 PE=4 SV=1	0	Both	known285	medium	Both	11.3973	5.69486	0	1	PAT1	manual	1	0	1	0	0	0	0	0	0	0	0	0	0	7.46	0	NA	7	1	9	22	0	16	6.56982	8.89007		10.1711	8.67029	8.95117	4.87085	6.4552		7.72521	6.97132	7.2522
2825	Q9VEZ3;E1JIM4		msps	>tr|Q9VEZ3|Q9VEZ3_DROME LP04448p OS=Drosophila melanogaster GN=msps PE=1 SV=3;>tr|E1JIM4|E1JIM4_DROME Mini spindles, isoform B OS=Drosophila melanogaster GN=msps PE=4 SV=1	0	Both	Rel_Homo_92	low	Both	1.16488	0.272313	0	0	NA	NA	0	0	1	0	0	0	0	0	0	0	0	0	0	8.25	0	NA	15	9	90	32	24	76	7.73927	9.49118	8.505	9.83588	10.2122	9.96094	5.69788	6.66412	6.46361	7.07214	8.17076	7.91954
2835	Q9VF26	Probable ATP-dependent RNA helicase spindle-E	spn-E	>sp|Q9VF26|SPNE_DROME Probable ATP-dependent RNA helicase spindle-E OS=Drosophila melanogaster GN=spn-E PE=2 SV=1	0	Both	known285	high	Both	7.3556	14.1248	0	1	DEAD;HA2;TUDOR	1;1;1	1	1	1	0	1	0	0	0	0	0	1	1	1	6.83	0	no	3	0	4	16	2	1		8.03595	6.05046	9.51259	8.07704	7.94647		5.47864	4.15836	6.92189	6.18495	6.05438
2844	Q9VF56			>tr|Q9VF56|Q9VF56_DROME CG5205 OS=Drosophila melanogaster GN=CG5205 PE=4 SV=2	0	Both	known285	high	Both	124.948	326.451	0	1	DEAD	2	1	0	1	1	1	0	1	1	0	0	0	1	1	7.15	0	NA	35	6	19	108	25	1	7.36222	10.0942	8.29957	11.4781	8.73483	8.40381	5.29032	7.18676	6.22768	8.56328	6.66296	6.33193
2851	Q9VF89	39S ribosomal protein L9, mitochondrial	mRpL9	>sp|Q9VF89|RM09_DROME 39S ribosomal protein L9, mitochondrial OS=Drosophila melanogaster GN=mRpL9 PE=2 SV=1	0	Both	known285	high	Both	0.337231	739.779	0	1	Ribosomal_L9_N	1	1	1	1	1	0	0	1	0	1	0	0	0	0	9.32	1	NA	2	0	8	29	6	5		7.40562	8.28219	12.0673	8.83759	8.59449		5.53732	7.0269	9.92584	7.58231	7.33921
2857	Q9VFC8-2;Q9VFC8	Putative glycogen [starch] synthase	CG6904	>sp|Q9VFC8-2|GYS_DROME Isoform B of Putative glycogen [starch] synthase OS=Drosophila melanogaster GN=CG6904;>sp|Q9VFC8|GYS_DROME Putative glycogen [starch] synthase OS=Drosophila melanogaster GN=CG6904 PE=1 SV=2	0	Both	new99	low	Both	0.409488	0.905381	0	0	NA	NA	0	0	0	0	0	0	0	0	0	1	0	0	0	6.19	0	NA	5	2	31	12	0	16	7.33256	8.7443		9.5115	9.98113	9.13865	5.78849	6.47637		7.26893	8.43705	7.59457
2858	Q9VFE4	40S ribosomal protein S5b	RpS5b	>sp|Q9VFE4|RS5B_DROME 40S ribosomal protein S5b OS=Drosophila melanogaster GN=RpS5b PE=2 SV=1	0	Both	known285	medium	Both	2.66589	2.52508	1	1	Ribosomal_S7	1	1	1	1	1	1	1	1	1	1	1	1	1	0	8.79	1	NA	2	2	5	4	1	5	7.64932	9.64216	7.4889	10.6962	9.99108	9.79084	6.69507	7.88974	6.53466	8.9564	9.03683	8.8366
2860	Q9VFE7			>tr|Q9VFE7|Q9VFE7_DROME CG7262 OS=Drosophila melanogaster GN=Nup93-2 PE=2 SV=1	0	Both	Rel_Homo_92	medium	Both	0.750646	1.65089	0	0	NA	NA	0	0	1	0	0	0	0	0	0	0	0	0	0	6.76	0	NA	3	0	18	2	0	3		8.13066		7.77856	9.15512	7.27205		5.75865		5.50833	7.45614	5.57308
2862	Q9VFF0			>tr|Q9VFF0|Q9VFF0_DROME CG3731, isoform A OS=Drosophila melanogaster GN=CG3731 PE=2 SV=2	0	Both	new99	low	Both	0.301816	0.157032	0	0	NA	NA	0	0	0	0	0	0	0	0	0	1	0	0	0	5.67	0	NA	6	2	23	12	3	20	7.48357	9.06526	7.22214	9.5431	10.408	9.92875	6.10336	6.93461	5.84193	7.46205	9.0278	8.54854
2880	Q9VFT4		rin	>tr|Q9VFT4|Q9VFT4_DROME AT27578p OS=Drosophila melanogaster GN=rin PE=1 SV=1	0	Both	known285	medium	Both	8.95536	3.43634	1	1	NTF2;RRM_1	1;1	1	1	1	1	0	1	1	1	1	0	0	0	0	6.88	0	NA	17	8	27	25	11	28	8.19156	10.8007	9.26766	11.988	10.5275	10.854	6.7766	8.49163	7.85269	9.69269	9.11247	9.43906
2887	Q9VG05;E1JIJ7;Q8INH9			>tr|Q9VG05|Q9VG05_DROME CG7518, isoform E OS=Drosophila melanogaster GN=CG7518 PE=4 SV=3;>tr|E1JIJ7|E1JIJ7_DROME CG7518, isoform C OS=Drosophila melanogaster GN=CG7518 PE=4 SV=1;>tr|Q8INH9|Q8INH9_DROME CG7518, isoform D OS=Drosophila melanogaster GN=CG7518	0	Both	new99	medium	Both	12.645	1.57958	0	0	NA	NA	0	0	0	0	0	0	0	0	0	0	0	0	0	8.61	0	yes	6	0	13	14	8	5		8.79643	7.58016	9.24403	8.53925	8.64909		6.02292	5.53484	6.51984	6.49393	6.60377
2889	Q9VG07			>tr|Q9VG07|Q9VG07_DROME CG7488 OS=Drosophila melanogaster GN=CG7488 PE=2 SV=2	0	Both	known285	medium	365nm (X490) unique	5.82648	YW whole not available	0	1	MMR_HSR1	1	1	1	1	1	0	1	1	1	1	0	0	0	0	9.4	0	NA	3	0	5	14	0	0		8.19587		9.8801	8.32496			6.19521		7.83229	7.00273
2900	Q9VG73	Interleukin enhancer-binding factor 2 homolog	CG5641	>sp|Q9VG73|ILF2_DROME Interleukin enhancer-binding factor 2 homolog OS=Drosophila melanogaster GN=CG5641 PE=2 SV=1	0	Both	known285	high	Both	23.0687	91.4897	1	1	DZF	1	1	1	1	1	0	1	1	1	1	0	0	0	0	6.44	0	maybe	12	5	11	25	10	8	7.5345	10.0178	8.14888	11.49	9.39841	8.96725	6.23348	7.88749	6.84784	9.34512	8.0974	7.66622
2918	Q9VGH5;Q8INJ6		glo	>tr|Q9VGH5|Q9VGH5_DROME AT27789p OS=Drosophila melanogaster GN=glo PE=2 SV=1	0	Both	known285	high	Both	34.1732	8.58917	1	1	RRM_6	3	1	1	1	1	0	1	1	1	1	0	0	0	0	5.71	0	NA	13	6	15	28	7	18	8.34895	10.1347	7.97897	11.7848	9.335	10.2679	7.09367	8.04048	6.7237	9.66411	8.07972	9.01263
2920	Q9VGI8	Bloom syndrome protein homolog	mus309	>sp|Q9VGI8|BLM_DROME Bloom syndrome protein homolog OS=Drosophila melanogaster GN=Blm PE=1 SV=1	0	Both	known285	high	Both	35.2644	77.1576	0	1	DEAD;HRDC	1;1	1	0	0	0	0	0	0	0	0	0	0	0	0	8.72	0	no	6	2	7	29	3	3	6.69258	8.90262	6.93667	10.2	8.19123	7.84605	4.79495	6.26802	5.03906	7.55332	6.29361	5.94842
2926	Q9VGP4		Ranbp9	>tr|Q9VGP4|Q9VGP4_DROME LP08082p OS=Drosophila melanogaster GN=Ranbp9 PE=2 SV=1	0	Both	known285	low	Both	0.463559	1.22586	0	1	IBN_N	1	1	1	0	0	0	0	0	0	0	0	0	0	0	4.74	0	NA	7	2	36	13	1	15	6.94649	8.80266	6.5308	9.08708	9.9808	8.61377	5.2305	6.35797	4.81479	6.70373	8.26479	6.89776
2928	Q9VGP7		mRpL40	>tr|Q9VGP7|Q9VGP7_DROME Mitochondrial ribosomal protein L40 OS=Drosophila melanogaster GN=mRpL40 PE=2 SV=1	0	Both	known285	low	Both	0.307002	0.0493692	0	1	MRP.L28	1	1	1	1	1	0	0	1	0	0	0	0	0	0	9.48	1	NA	2	0	7	4	0	7		7.65894		8.74489	9.11072	9.69172		5.98355		7.0613	8.06934	8.65032
2929	Q9VGQ1			>tr|Q9VGQ1|Q9VGQ1_DROME CG5214 OS=Drosophila melanogaster GN=CG5214 PE=2 SV=1	0	Both	new99	low	Both	0.0594723	0.00262758	0	0	NA	NA	0	0	0	0	0	0	0	0	0	0	0	0	0	9.51	0	NA	2	0	14	2	0	16		7.78924		7.97691	9.94305	10.254		5.76423		6.01089	8.56284	8.87381
2934	Q9VGR7	J domain-containing protein CG6693	CG6693	>sp|Q9VGR7|Y6693_DROME J domain-containing protein CG6693 OS=Drosophila melanogaster GN=CG6693 PE=1 SV=1	0	Both	new99	low	Both	0.074159	0.0629104	0	0	NA	NA	0	0	0	0	0	0	0	0	0	0	0	0	0	8.65	0	NA	2	0	11	9	0	14		7.18929		8.6423	9.29693	9.49138		5.48022		6.89368	8.18298	8.37743
2944	Q9VGW6	DNA replication licensing factor Mcm5	Mcm5	>sp|Q9VGW6|MCM5_DROME DNA replication licensing factor Mcm5 OS=Drosophila melanogaster GN=Mcm5 PE=1 SV=1	0	Both	new99	low	Both	0.46599	0.467337	0	0	NA	NA	0	0	0	0	0	0	0	0	0	1	0	0	0	8.03	0	NA	5	3	35	6	4	17	7.30164	8.94926	7.16161	9.02535	10.113	8.97537	5.69957	6.60637	5.55954	6.76048	8.51092	7.37332
2946	Q9VGW9		mRpL37	>tr|Q9VGW9|Q9VGW9_DROME LD25118p OS=Drosophila melanogaster GN=mRpL37 PE=2 SV=3	0	Both	known285	high	Both	1.71659	475.102	0	1	PDCD9	1	1	1	1	1	0	1	0	1	0	0	0	0	0	9.55	1	NA	6	3	18	24	0	1	7.3517	8.63023		10.6761	9.25409	7.49779	5.95377	6.51788		8.49417	7.85614	6.09985
2957	Q9VH48	Probable histone-arginine methyltransferase CARMER	Art4	>sp|Q9VH48|CARM1_DROME Probable histone-arginine methyltransferase CARMER OS=Drosophila melanogaster GN=Art4 PE=1 SV=1	0	Both	Rel_Homo_92	low	Both	0.199129	0.379445	0	0	NA	NA	0	0	1	0	0	0	0	0	0	0	0	0	0	5.72	0	NA	2	1	17	3	0	10	6.59725	7.91888		8.69705	9.53716	8.76167	5.2355	5.90163		6.69663	8.17542	7.39995
2976	Q9VHC7		rump	>tr|Q9VHC7|Q9VHC7_DROME FI21236p1 OS=Drosophila melanogaster GN=rump PE=2 SV=1	0	Both	known285	high	Both	6.32285	16.7774	1	1	RRM_1	3	1	1	1	1	1	1	1	1	1	0	1	1	1	7.66	0	NA	10	3	15	25	9	19	7.57152	9.79608	7.98591	11.877	9.75717	10.0625	6.36741	7.78104	6.78179	9.80067	8.55306	8.85842
2997	Q9VHL2		Tcp-1eta	>tr|Q9VHL2|Q9VHL2_DROME LD47396p OS=Drosophila melanogaster GN=Tcp-1eta PE=2 SV=2	0	Both	Rel_Homo_92	low	Both	0.337358	0.786337	0	0	NA	NA	0	0	1	0	1	0	0	0	0	0	1	0	0	5.97	0	NA	9	11	42	24	10	39	8.30343	9.48233	8.36076	10.5253	10.7422	10.1392	6.75937	7.15333	6.81669	8.20828	9.19816	8.59514
3001	Q9VHN6	39S ribosomal protein L19, mitochondrial	mRpL19	>sp|Q9VHN6|RM19_DROME 39S ribosomal protein L19, mitochondrial OS=Drosophila melanogaster GN=mRpL19 PE=2 SV=1	0	Both	known285	medium	Both	0.814401	3.64461	0	1	Ribosomal_L19	1	1	1	1	0	0	0	0	0	1	1	0	0	0	8.92	1	NA	3	0	8	14	1	11		8.06835	6.14029	10.3196	9.06254	9.2826		6.2865	5.02637	8.44782	7.94859	8.16864
3002	Q9VHN7			>tr|Q9VHN7|Q9VHN7_DROME CG8036, isoform B OS=Drosophila melanogaster GN=CG8036 PE=2 SV=3	0	Both	Rel_Homo_92	low	Both	0.149944	0.526443	0	0	NA	NA	0	0	1	0	1	0	0	0	0	0	1	1	0	6.66	0	NA	8	8	44	19	13	30	8.17699	9.41966	7.99462	10.2058	11.0369	10.0175	6.67183	7.13475	6.48947	7.95118	9.53175	8.5123
3003	Q9VHP0	ATP-dependent RNA helicase bel	bel	>sp|Q9VHP0|DDX3_DROME ATP-dependent RNA helicase bel OS=Drosophila melanogaster GN=bel PE=1 SV=1	0	Both	known285	high	Both	50.9777	140.189	1	1	DEAD	1	1	1	1	1	1	1	1	0	1	0	1	1	1	7.18	0	NA	33	11	45	51	29	27	8.59493	11.3763	9.25001	12.3498	10.3002	9.57863	6.97168	8.81137	7.62677	9.81962	8.67691	7.95538
3008	Q9VHR5			>tr|Q9VHR5|Q9VHR5_DROME CG9684 OS=Drosophila melanogaster GN=CG9684 PE=4 SV=2	0	Both	known285	medium	Both	2.10903	10.2089	0	1	TUDOR	2	1	0	1	0	0	0	0	0	0	0	0	0	0	8.29	0	NA	7	3	19	23	1	9	7.14151	8.73273	6.3448	10.2465	9.25869	8.76749	5.53944	6.40778	4.74275	7.89193	7.65663	7.16542
3015	Q9VHT5		mRpL1	>tr|Q9VHT5|Q9VHT5_DROME LD31571p OS=Drosophila melanogaster GN=mRpL1 PE=2 SV=2	0	Both	known285	high	Both	4.75289	16.6913	1	1	Ribosomal_L1	1	1	1	1	1	0	1	1	1	0	0	0	0	0	9.44	1	NA	5	0	10	20	0	10		8.85235		10.8937	9.01553	9.15369		6.79734		8.77149	7.6933	7.83147
3036	Q9VI58;Q86BP3			>tr|Q9VI58|Q9VI58_DROME CG1091, isoform B OS=Drosophila melanogaster GN=CG1091 PE=2 SV=1;>tr|Q86BP3|Q86BP3_DROME CG1091, isoform A OS=Drosophila melanogaster GN=CG1091 PE=4 SV=1	Validated	Both	known285	high	Both	11.7598	117.73	0	1	PAP_assoc	1	1	0	0	0	0	0	0	0	0	0	0	0	0	9.11	0	NA	8	2	13	21	12	2	7.1211	9.53106	8.41674	10.596	9.24462	8.02946	5.67394	7.29493	6.96957	8.37072	7.79745	6.5823
3045	Q9VIE7		bur	>tr|Q9VIE7|Q9VIE7_DROME Burgundy OS=Drosophila melanogaster GN=bur PE=2 SV=3	0	Both	new99	low	Both	0.185916	1.78157	0	0	NA	NA	0	0	0	0	1	0	0	0	0	0	1	1	0	6.37	0	NA	3	0	28	2	0	5		8.17603		8.2523	9.80281	7.67794		5.90815		6.05523	8.21176	6.08689
3046	Q9VIE8;Q8T4D6		Acon	>tr|Q9VIE8|Q9VIE8_DROME Aconitase, isoform B OS=Drosophila melanogaster GN=Acon PE=2 SV=2	0	Both	known285	low	Both	1.25536	0.195408	0	1	Aconitase;Aconitase_C	1;1	1	0	0	0	0	0	0	0	0	1	0	0	0	8.49	0	NA	19	13	45	13	2	29	8.46486	9.94689	6.98509	9.48921	10.5977	9.78385	6.87379	7.53244	5.39403	7.20126	9.00659	8.19279
3048	Q9VIF1	Probable exonuclease mut-7 homolog	CG9247	>sp|Q9VIF1|MUT7_DROME Probable exonuclease mut-7 homolog OS=Drosophila melanogaster GN=CG9247 PE=1 SV=1	0	Both	Rel_Homo_92	high	Both	50.9777	762.394	0	0	NA	NA	0	0	1	0	0	0	0	0	0	0	0	0	0	7.82	0	NA	11	2	9	29	2	1	6.69402	9.45375	6.75983	10.5495	8.53672	7.17508	5.17551	7.15266	5.24132	8.25628	7.0182	5.65658
3061	Q9VIK6		Cen	>tr|Q9VIK6|Q9VIK6_DROME Centrocortin, isoform A OS=Drosophila melanogaster GN=Cen PE=2 SV=1	0	Both	new99	medium	Both	2.58392	0.31399	0	0	NA	NA	0	0	0	0	0	0	0	0	0	0	0	0	0	5.49	0	NA	4	1	11	7	0	14	6.3887	8.23547		9.02266	8.71439	9.1456	4.6727	5.83773		6.64403	6.99838	7.42959
3071	Q9VIS4			>tr|Q9VIS4|Q9VIS4_DROME tRNA-dihydrouridine(47) synthase [NAD(P)(+)] OS=Drosophila melanogaster GN=CG10463 PE=3 SV=1	0	Both	known285	high	365nm (X490) unique	10.5262	YW whole not available	0	1	Dus	1	1	1	1	1	1	0	1	0	0	0	0	1	1	6.92	0	NA	4	0	6	18	11	0		8.60203	8.12798	9.84154	8.44061			6.41283	6.65087	7.64168	6.96349
3076	Q9VIW7	tRNA-splicing ligase RtcB homolog	CG9987	>sp|Q9VIW7|RTCB_DROME tRNA-splicing ligase RtcB homolog OS=Drosophila melanogaster GN=CG9987 PE=1 SV=1	0	Both	known285	low	365nm (X490) unique	0.856395	YW whole not available	0	1	RtcB	1	1	1	1	1	0	1	1	1	1	0	0	0	0	7.6	0	NA	2	1	12	13	0	0	6.62974	8.12155		9.44308	9.08952		5.26799	6.08753		7.38787	7.72779
3087	Q9VJ19;M9PDN1		RpL30	>tr|Q9VJ19|Q9VJ19_DROME RE25263p OS=Drosophila melanogaster GN=RpL30 PE=1 SV=1	0	Both	known285	low	Both	0.10299	1.14796	0	1	Ribosomal_L7Ae	1	1	1	1	1	1	1	1	1	1	0	1	1	0	9.62	1	NA	3	4	7	6	4	6	7.44934	8.5717	8.42256	10.6374	10.4223	10.0787	6.75037	7.16316	7.72358	9.15721	9.72329	9.37976
3095	Q9VJ39			>tr|Q9VJ39|Q9VJ39_DROME CG10602, isoform B OS=Drosophila melanogaster GN=CG10602 PE=4 SV=3	0	Both	Rel_Homo_92	low	Both	0.0889853	0.0609415	0	0	NA	NA	0	0	1	1	0	1	0	0	0	0	0	0	0	5.32	0	NA	3	3	32	6	0	24	7.33664	8.39557		8.70437	10.3242	9.56271	5.88948	6.25343		6.61799	8.87704	8.11554
3108	Q9VJ86		bsf	>tr|Q9VJ86|Q9VJ86_DROME Bicoid stability factor OS=Drosophila melanogaster GN=bsf PE=2 SV=2	0	Both	known285	high	Both	82.5131	1764.42	1	0	NA	NA	1	1	1	1	0	1	1	1	1	0	0	0	0	6.73	0	NA	69	39	63	132	57	30	9.11005	11.402	9.48118	13.1598	10.1145	9.2292	7.19098	8.53903	7.56211	10.2743	8.19543	7.31012
3119	Q9VJH2		mdy	>tr|Q9VJH2|Q9VJH2_DROME CG31739, isoform A OS=Drosophila melanogaster GN=mdy PE=2 SV=3	0	Both	known285	high	Both	51.0094	1840.61	0	1	tRNA_anti.codon;tRNA.synt_2	1;1	1	1	1	1	0	0	0	1	0	0	0	0	0	5.57	0	NA	19	1	20	62	19	6	6.52145	9.91954	8.41325	11.7566	8.96367	7.91072	4.86824	7.44518	6.76005	9.24	7.31046	6.25751
3129	Q9VJY6	60S ribosomal protein L24	RpL24	>sp|Q9VJY6|RL24_DROME 60S ribosomal protein L24 OS=Drosophila melanogaster GN=RpL24 PE=1 SV=1	0	Both	known285	high	Both	0.171439	42.8313	0	1	Ribosomal_L24e	1	1	1	1	1	1	1	1	1	0	1	1	1	0	11.07	1	NA	2	1	7	6	1	3	7.22531	8.58654	7.60523	10.7113	10.2146	8.57538	6.38021	7.03064	6.76013	9.07958	9.36946	7.73029
3147	Q9VK58			>tr|Q9VK58|Q9VK58_DROME CG5792, isoform D OS=Drosophila melanogaster GN=CG5792 PE=4 SV=5	0	Both	new99	NA		X490 whole not available	YW whole not available	0	0	NA	NA	0	0	0	0	0	0	0	0	0	0	0	0	0	9.75	0	NA	2	0	0	2	0	0		7.33084		7.28024				4.92465		4.94625
3148	Q9VK59			>tr|Q9VK59|Q9VK59_DROME CG5787, isoform A OS=Drosophila melanogaster GN=CG5787 PE=2 SV=2	0	Both	new99	high	Both	33.6132	104.739	0	0	NA	NA	0	0	0	0	0	0	0	0	0	0	0	0	0	9.75	0	NA	15	2	16	37	2	7	7.26373	9.65123	7.19162	10.7429	8.89872	8.21635	5.48558	7.07416	5.41348	8.17583	7.12057	6.43819
3152	Q9VK69	T-complex protein 1 subunit delta		>tr|Q9VK69|Q9VK69_DROME T-complex protein 1 subunit delta OS=Drosophila melanogaster GN=CG5525 PE=2 SV=1	0	Both	Rel_Homo_92	low	Both	0.114711	0.256203	0	0	NA	NA	0	0	0	1	1	1	0	1	1	1	1	1	0	7.5	0	NA	6	5	29	18	6	25	7.90027	8.94413	7.4292	10.267	10.7171	10.3869	6.43788	6.74135	5.96681	8.05065	9.25467	8.92454
3157	Q9VKB0;Q8IP94		Aats-thr	>tr|Q9VKB0|Q9VKB0_DROME FI05224p OS=Drosophila melanogaster GN=Aats-thr PE=2 SV=2;>tr|Q8IP94|Q8IP94_DROME Threonyl-tRNA synthetase, isoform B OS=Drosophila melanogaster GN=Aats-thr PE=3 SV=1	0	Both	known285	low	Both	0.427658	0.262615	0	1	HGTP_anticodon;tRNA_SAD;tRNA.synt_2b	1;1;1	1	0	1	0	1	0	0	0	0	0	1	1	0	7.83	0	NA	9	4	39	7	3	26	7.42711	9.17167	7.13723	9.1223	10.3543	9.31553	5.77389	6.75924	5.48401	6.79916	8.70107	7.66231
3173	Q9VKI8			>tr|Q9VKI8|Q9VKI8_DROME CG6287 OS=Drosophila melanogaster GN=CG6287 PE=2 SV=1	not_confirmed	Both	new99	low	Both	0.165866	0.028581	0	0	NA	NA	0	0	0	0	0	0	0	0	0	0	0	0	0	6.96	0	NA	2	3	18	5	3	17	7.57613	8.80774	7.5415	8.93993	10.4318	10.1098	6.32087	6.82336	6.28623	7.02812	9.17653	8.85452
3179	Q9VKK1	Enhancer of mRNA-decapping protein 4 homolog	Ge-1	>sp|Q9VKK1|EDC4_DROME Enhancer of mRNA-decapping protein 4 homolog OS=Drosophila melanogaster GN=Ge-1 PE=1 SV=2	0	Both	Rel_Homo_92	medium	Both	3.5674	0.586076	0	0	NA	NA	0	1	1	1	0	0	0	1	0	0	0	0	0	5.61	0	NA	6	7	31	10	1	19	7.77059	9.18447	6.19582	9.17149	9.44475	9.01246	5.9782	6.63179	4.40341	6.70556	7.65236	7.22008
3180	Q9VKM1	Protein piwi	piwi	>sp|Q9VKM1|PIWI_DROME Protein piwi OS=Drosophila melanogaster GN=piwi PE=1 SV=1	0	Both	known285	high	Both	36.837	4174.63	1	1	PAZ;Piwi	1;1	1	0	1	0	0	0	0	0	0	0	0	0	0	9.6	0	no	30	5	32	47	11	1	7.73607	10.4818	7.86258	11.4523	9.6208	7.27314	6.01178	7.88988	6.1383	8.88701	7.89652	5.54887
3198	Q9VKW5			>tr|Q9VKW5|Q9VKW5_DROME CG5355 OS=Drosophila melanogaster GN=CG5355 PE=2 SV=2	0	Both	new99	low	Both	0.0855522	0.170729	0	0	NA	NA	0	0	0	0	0	0	0	0	0	0	0	0	0	5.84	0	NA	4	2	37	8	1	27	6.89569	8.316	6.2858	9.01567	10.2683	9.40374	5.24247	5.97439	4.6326	6.70037	8.61509	7.75053
3226	Q9VL70		yip2	>tr|Q9VL70|Q9VL70_DROME HL08109p OS=Drosophila melanogaster GN=yip2 PE=2 SV=1	0	Both	Rel_Homo_92	low	Both	0.254041	0.129945	0	0	NA	NA	0	0	0	1	1	1	0	0	0	0	1	0	0	8.73	0	NA	4	4	24	10	2	20	7.7276	9.08487	7.01791	9.32358	10.5009	9.80758	6.38518	6.9904	5.67549	7.29645	9.15842	8.46516
3229	Q9VL78	FK506-binding protein 59	FKBP59	>sp|Q9VL78|FKB59_DROME FK506-binding protein 59 OS=Drosophila melanogaster GN=FKBP59 PE=1 SV=1	0	Both	Rel_Homo_92	low	Both	0.298507	0.0056077	0	0	NA	NA	0	0	0	1	1	1	0	0	0	0	0	1	0	5.31	0	NA	5	8	33	6	1	33	8.13101	9.21958	6.78316	8.80453	10.5543	10.6916	6.73308	7.05843	5.38521	6.75998	9.1564	9.29367
3247	Q9VLM8	Alanine--tRNA ligase, cytoplasmic	Aats-ala	>sp|Q9VLM8|SYAC_DROME Alanine--tRNA ligase, cytoplasmic OS=Drosophila melanogaster GN=Aats-ala PE=2 SV=1	0	Both	known285	low	Both	0.4513	0.455685	1	1	DHHA1;tRNA_SAD;tRNA.synt_2c	1;1;1	1	1	1	1	1	0	0	1	0	0	1	1	0	5.77	0	NA	10	2	51	9	2	24	7.65097	9.23845	6.75349	9.26347	10.3922	9.20699	5.9434	6.76612	5.04591	6.87561	8.68458	7.49941
3259	Q9VLS0			>tr|Q9VLS0|Q9VLS0_DROME CG8460 OS=Drosophila melanogaster GN=CG8460 PE=2 SV=1	0	Both	new99	medium	Both	0.981578	9.0377	0	0	NA	NA	0	0	0	0	0	0	0	0	0	0	0	0	0	9.02	0	NA	2	0	11	7	0	3		7.75954		9.48738	8.69821	8.11707		5.75548		7.42891	7.33648	6.75533
3286	Q9VM69		nop5	>tr|Q9VM69|Q9VM69_DROME CG10206-PA OS=Drosophila melanogaster GN=nop5 PE=2 SV=2	0	Both	known285	medium	Both	0.883637	3.13883	0	1	Nop;NOP5NT	1;1	1	1	1	1	1	1	1	1	1	0	1	1	1	8.71	0	NA	4	2	18	18	1	22	6.21368	8.48899	6.52408	10.5203	9.41291	9.53339	4.85196	6.42454	5.16236	8.38596	8.05119	8.17167
3291	Q9VMA3	Protein cup	cup	>sp|Q9VMA3|CUP_DROME Protein cup OS=Drosophila melanogaster GN=cup PE=1 SV=3	0	Both	known285	high	Both	22.6592	23.9102	1	1	EIF4E.T	1	1	0	1	0	0	0	0	0	0	0	0	0	0	8.96	0	NA	29	25	45	54	33	35	9.35991	10.9222	9.42065	11.9699	10.2358	9.99478	7.65234	8.3105	7.71308	9.38333	8.52818	8.28722
3308	Q9VMI3;A1ZAW7			>tr|Q9VMI3|Q9VMI3_DROME CG9140 OS=Drosophila melanogaster GN=CG9140 PE=2 SV=1	0	Both	new99	low	Both	0.146595	0.316862	0	0	NA	NA	0	0	0	0	0	0	0	0	0	0	0	0	0	8.77	0	NA	2	0	17	2	1	9		8.07953	6.42975	8.35996	9.81752	8.52762		6.0683	5.08732	6.4036	8.4751	7.1852
3309	Q9VMI5			>tr|Q9VMI5|Q9VMI5_DROME CG9135 protein OS=Drosophila melanogaster GN=CG9135 PE=2 SV=1	Validated	Both	Rel_Homo_92	medium	Both	0.23783	5.07129	0	0	NA	NA	0	0	0	1	0	1	1	1	1	0	0	0	0	6.71	0	NA	3	2	24	16	1	12	7.35332	8.69203	6.64503	10.2493	10.1692	9.07397	6.01089	6.63008	5.30261	8.15421	8.82674	7.73156
3345	Q9VN21;Q8IPM3		lost	>tr|Q9VN21|Q9VN21_DROME Growl, isoform A OS=Drosophila melanogaster GN=lost PE=2 SV=1;>tr|Q8IPM3|Q8IPM3_DROME Growl, isoform B (Fragment) OS=Drosophila melanogaster GN=lost PE=4 SV=2	0	Both	Rel_Homo_92	high	Both	79.1373	58.8324	0	0	NA	NA	0	1	1	1	0	1	1	1	0	0	0	0	0	9.12	0	NA	41	18	33	59	33	33	9.46081	11.914	10.1941	12.878	10.6023	10.4451	8.01364	9.48064	8.74691	10.4851	9.15518	8.99798
3346	Q9VN25;Q9VN25-2	Eukaryotic translation initiation factor 3 subunit A	eIF3-S10	>sp|Q9VN25|EIF3A_DROME Eukaryotic translation initiation factor 3 subunit A OS=Drosophila melanogaster GN=eIF3-S10 PE=1 SV=1;>sp|Q9VN25-2|EIF3A_DROME Isoform B of Eukaryotic translation initiation factor 3 subunit A OS=Drosophila melanogaster GN=eIF3-S10	0	Both	known285	high	Both	4.56163	45.5622	1	0	NA	NA	1	1	1	1	1	1	1	1	1	1	1	1	1	9.1	0	NA	31	11	57	64	26	36	8.4256	10.4618	8.60997	12.1385	10.5096	9.87089	6.70133	7.87154	6.88569	9.52276	8.78534	8.14662
3348	Q9VN44		Karybeta3	>tr|Q9VN44|Q9VN44_DROME FI07923p OS=Drosophila melanogaster GN=Karybeta3 PE=2 SV=1	0	Both	Rel_Homo_92	low	Both	0.542664	0.0485853	0	0	NA	NA	0	1	0	1	1	0	1	1	1	0	1	0	0	4.61	0	NA	12	4	46	8	3	37	7.6983	9.45529	6.95827	8.69639	10.511	9.65369	6.00809	6.98238	5.26809	6.36752	8.82078	7.96349
3351	Q9VN58		ctrip	>tr|Q9VN58|Q9VN58_DROME CG42574 OS=Drosophila melanogaster GN=ctrip PE=4 SV=4	0	Both	new99	medium	Both	4.63528	13.0114	0	0	NA	NA	0	0	0	0	0	0	0	0	0	0	0	0	0	6.8	0	NA	5	3	18	22	16	6	6.94867	8.54706	8.10411	9.58136	8.74639	8.04587	4.94434	5.83521	6.09978	6.8734	6.74206	6.04155
3367	Q9VNE2	Protein extra bases	exba	>sp|Q9VNE2|PKRA_DROME Protein krasavietz OS=Drosophila melanogaster GN=kra PE=1 SV=1	0	Both	known285	low	Both	0.288938	0.734682	0	1	W2	1	1	1	1	1	0	1	1	1	1	0	0	0	0	5.58	0	NA	6	2	27	21	5	29	6.82447	8.65451	7.55425	10.6507	10.0502	10.2849	5.3931	6.50672	6.12287	8.43718	8.61884	8.85355
3369	Q9VNE9	60S ribosomal protein L13a	RpL13A	>sp|Q9VNE9|RL13A_DROME 60S ribosomal protein L13a OS=Drosophila melanogaster GN=RpL13A PE=1 SV=1	0	Both	known285	high	Both	0.427809	27.971	0	1	Ribosomal_L13	1	1	1	1	1	1	1	0	1	1	1	1	1	0	11.04	1	NA	4	4	13	8	3	5	8.02526	9.19112	7.13319	10.5019	10.372	8.56638	6.98387	7.3889	6.09181	8.68923	9.33058	7.52499
3373	Q9VNF8		sec23	>tr|Q9VNF8|Q9VNF8_DROME Sec23, isoform A OS=Drosophila melanogaster GN=Sec23 PE=4 SV=2	0	Both	new99	medium	Both	0.320465	3.01671	0	0	NA	NA	0	0	0	0	1	0	0	0	0	0	1	0	0	6.33	0	NA	3	0	27	7	0	7		8.39287		9.10319	9.76525	8.23759		6.16664		6.90318	8.23378	6.70612
3377	Q9VNG2			>tr|Q9VNG2|Q9VNG2_DROME CG1109, isoform A OS=Drosophila melanogaster GN=CG1109 PE=2 SV=2	Validated	Both	Rel_Homo_92	NA	365nm (X490) unique	X490 whole not available	YW whole not available	0	0	NA	NA	0	0	1	1	1	0	1	1	0	0	0	1	0	8.97	0	NA	2	0	2	19	1	0		8.20181	6.6151	10.1366				6.03149	5.12372	7.9008
3396	Q9VNV3	ATP-dependent RNA helicase Ddx1	Ddx1	>sp|Q9VNV3|DDX1_DROME ATP-dependent RNA helicase Ddx1 OS=Drosophila melanogaster GN=Ddx1 PE=2 SV=1	0	Both	known285	high	Both	1.17266	39.4091	1	1	DEAD	1	1	1	1	1	1	1	1	1	1	0	1	1	1	6.42	0	NA	4	2	23	23	0	4	6.58123	8.37289		9.8268	9.18353	7.792	4.95798	6.05652		7.48189	7.56028	6.16876
3432	Q9VPK7	Putative tRNA pseudouridine synthase Pus10	Pus10	>sp|Q9VPK7|PUS10_DROME Putative tRNA pseudouridine synthase Pus10 OS=Drosophila melanogaster GN=Pus10 PE=2 SV=2	0	Both	known285	medium	365nm (X490) unique	1.456	YW whole not available	1	0	NA	NA	1	1	1	0	0	0	0	0	0	0	0	0	0	8.63	0	NA	2	0	6	12	0	0		7.53387		9.16747	8.31998			5.46306		7.04708	6.87282
3449	Q9VPT3		KH1	>tr|Q9VPT3|Q9VPT3_DROME KH1 OS=Drosophila melanogaster GN=Dbp21E2 PE=2 SV=1	0	Both	known285	high	Both	29.4224	4274.27	0	1	DEAD	1	1	1	1	1	1	1	1	0	0	0	0	1	0	9.43	0	NA	7	0	7	35	1	2		9.14234	6.95059	11.559	8.48978	7.36175		6.90842	5.47347	9.23302	7.01267	5.88463
3455	Q9VPX3			>tr|Q9VPX3|Q9VPX3_DROME CG4749 OS=Drosophila melanogaster GN=CG4749 PE=2 SV=1	Validated	Both	known285	high	Both	25.5853	1339.92	0	1	Nol1_Nop2_Fmu	1	1	1	0	0	1	0	0	0	0	0	1	1	0	6.72	0	NA	4	2	5	24	9	1	7.21714	8.76532	8.62857	10.8318	8.20469	7.1917	5.83693	6.65954	7.24837	8.65609	6.82447	5.81148
3461	Q9VPY2		Plap	>tr|Q9VPY2|Q9VPY2_DROME Phospholipase A2 activator protein, isoform A OS=Drosophila melanogaster GN=Plap PE=2 SV=1	0	Both	new99	low	Both	0.310965	0.0924709	0	0	NA	NA	0	0	0	0	0	0	0	0	0	0	0	0	0	5.54	0	NA	4	0	30	4	0	16		8.31573		8.14261	9.70757	8.8611		5.98391		5.90117	8.06412	7.21764
3484	Q9VQE0		Drp1	>tr|Q9VQE0|Q9VQE0_DROME Dynamin related protein 1, isoform A OS=Drosophila melanogaster GN=Drp1 PE=2 SV=1	0	Both	Rel_Homo_92	low	Both	0.285466	0.05836	0	0	NA	NA	0	0	1	0	0	0	0	0	0	0	0	0	0	6.51	0	NA	3	3	33	4	0	21	7.14777	8.47795		8.3415	9.89352	9.24529	5.47569	6.10404		6.05683	8.22141	7.57319
3498	Q9VQL1			>tr|Q9VQL1|Q9VQL1_DROME CG17259, isoform A OS=Drosophila melanogaster GN=CG17259 PE=2 SV=1	0	Both	known285	low	Both	0.0364193	0.0292795	0	1	Seryl_tRNA_N;tRNA.synt_2b	1;1	1	1	1	1	1	0	0	1	0	0	1	1	0	6.07	0	NA	3	0	26	5	2	22		7.81668	6.37195	8.73501	10.1812	9.90942		5.72245	4.92479	6.64635	8.73405	8.46226
3509	Q9VQR8			>tr|Q9VQR8|Q9VQR8_DROME CG33123 OS=Drosophila melanogaster GN=CG33123 PE=3 SV=2	0	Both	known285	low	Both	0.259539	0.867874	0	1	tRNA.synt_1;Anticodon_1;tRNA.synt_1g	2;1;1	1	1	1	0	1	0	0	0	0	0	1	1	0	7.53	0	NA	7	1	45	3	0	9	6.62759	8.64703		8.39868	10.09	8.1259	4.80805	6.1117		5.96235	8.27042	6.30636
3550	Q9VRJ7			>tr|Q9VRJ7|Q9VRJ7_DROME CG4611 OS=Drosophila melanogaster GN=CG4611 PE=2 SV=1	0	Both	Rel_Homo_92	high	Both	7.30538	999.624	0	0	NA	NA	0	1	0	1	0	1	1	0	1	0	0	0	0	9.11	0	NA	2	0	7	36	1	6		8.34833	6.65463	11.1839	8.36654	7.64525		6.10096	5.09833	8.80632	6.81024	6.08895
3573	Q9VRV8;Q9VRV9		Trn	>tr|Q9VRV8|Q9VRV8_DROME FI21453p1 OS=Drosophila melanogaster GN=Trn PE=2 SV=1	0	Both	known285	medium	Both	1.02982	1.18755	0	1	IBN_N	1	1	1	0	1	1	1	1	1	1	0	0	1	0	4.93	0	NA	7	1	28	11	0	14	6.4089	8.67477		9.2155	9.51685	8.74654	4.80684	6.35463		6.93666	7.91479	7.14448
3592	Q9VSA3	Probable medium-chain specific acyl-CoA dehydrogenase, mitochondrial	CG12262	>sp|Q9VSA3|ACADM_DROME Probable medium-chain specific acyl-CoA dehydrogenase, mitochondrial OS=Drosophila melanogaster GN=CG12262 PE=1 SV=1	0	Both	new99	low	Both	0.25263	0.175355	0	0	NA	NA	0	0	0	0	0	0	0	0	0	1	0	0	0	7.07	0	NA	6	2	23	9	1	19	7.70624	9.15529	6.55607	9.7111	10.5679	10.0365	6.34451	7.03571	5.19435	7.63621	9.20615	8.67476
3601	Q9VSE6		RecQ4	>tr|Q9VSE6|Q9VSE6_DROME RecQ4 OS=Drosophila melanogaster GN=RecQ4 PE=4 SV=1	0	Both	known285	medium	Both	1.879	1.64981	0	1	DEAD	1	1	0	0	0	0	0	0	0	0	0	0	0	0	6.86	0	NA	2	3	19	7	4	4	7.04751	8.19798	7.15881	8.78334	8.81835	8.20333	5.26937	5.74121	5.38065	6.36014	7.04021	6.42518
3608	Q9VSK9			>tr|Q9VSK9|Q9VSK9_DROME CG6745 OS=Drosophila melanogaster GN=CG6745 PE=2 SV=1	0	Both	known285	high	Both	18.969	12.7556	1	1	TruD	1	1	1	1	1	1	1	1	1	1	0	0	1	0	5.51	0	NA	16	9	13	37	4	23	7.82764	9.63886	6.96573	10.9714	9.13583	9.34244	6.24785	7.26117	5.38595	8.5859	7.55605	7.76267
3637	Q9VT38			>tr|Q9VT38|Q9VT38_DROME CG18178, isoform A OS=Drosophila melanogaster GN=CG18178 PE=2 SV=1	0	Both	known285	medium	Both	8.49056	0.276516	0	1	RRM_6	1	1	0	0	0	0	0	0	0	0	0	0	0	0	9.17	0	NA	3	0	1	5	0	8		7.8835		8.93255	7.8749	9.1173		6.15174		7.19739	6.79573	8.03814
3641	Q9VT61			>tr|Q9VT61|Q9VT61_DROME CG8108, isoform A OS=Drosophila melanogaster GN=CG8108 PE=2 SV=1	0	Both	new99	high	Both	7.45544	24.1265	0	0	NA	NA	0	0	0	0	0	0	0	0	0	0	0	0	0	5.82	0	yes	4	0	9	11	3	4		8.7349	7.53418	10.1747	8.71229	8.32748		6.29583	5.81817	7.71151	6.99628	6.61149
3652	Q9VTF8		mRpL2	>tr|Q9VTF8|Q9VTF8_DROME Mitochondrial ribosomal protein L2 OS=Drosophila melanogaster GN=mRpL2 PE=4 SV=1	0	Both	known285	high	Both	6.57358	181.194	0	1	Ribosomal_L2;Ribosomal_L2_C	1;1	1	1	1	1	0	1	1	0	1	0	0	0	0	10.36	1	NA	3	2	6	23	4	6	7.3082	8.81449	8.35872	11.7434	8.83996	8.90535	6.07777	6.85438	7.12827	9.65057	7.60951	7.6749
3664	Q9VTP4;Q8IGE1	60S ribosomal protein L10a-2	RpL10Ab	>sp|Q9VTP4|R10AB_DROME 60S ribosomal protein L10a-2 OS=Drosophila melanogaster GN=RpL10Ab PE=1 SV=2;>tr|Q8IGE1|Q8IGE1_DROME RH43519p OS=Drosophila melanogaster GN=RpL10Ab PE=2 SV=1	0	Both	known285	low	Both	0.137127	0.0205461	1	1	Ribosomal_L1	1	1	1	1	1	1	1	1	1	1	1	0	1	0	9.87	1	NA	4	0	18	6	1	20		8.92725	6.81632	9.40163	10.6241	10.6809		7.18825	5.81632	7.71119	9.62406	9.68093
3671	Q9VTU4	Eukaryotic translation initiation factor 3 subunit L	CG5642	>sp|Q9VTU4|EIF3L_DROME Eukaryotic translation initiation factor 3 subunit L OS=Drosophila melanogaster GN=CG5642 PE=2 SV=1	0	Both	known285	medium	Both	1.33862	14.2506	1	1	Paf67	1	1	1	1	1	0	1	1	1	0	1	0	0	0	5.6	0	NA	8	2	24	19	1	15	7.70237	9.35856	7.2717	10.6328	10.0301	8.98058	6.35995	7.24142	5.92927	8.50951	8.68769	7.63815
3685	Q9VU02	Probable small nuclear ribonucleoprotein Sm D1	SmD1	>sp|Q9VU02|SMD1_DROME Probable small nuclear ribonucleoprotein Sm D1 OS=Drosophila melanogaster GN=SmD1 PE=1 SV=1	0	Both	known285	medium	Both	0.366218	2.92658	0	1	LSM	1	1	1	1	1	0	1	1	0	0	1	0	0	0	11.65	0	NA	3	1	3	5	4	3	6.74056	8.05984	7.8903	9.39237	9.40183	8.51871	6.13849	6.79059	7.28825	8.10054	8.79977	7.91665
3692	Q9VU36		mRpL20	>tr|Q9VU36|Q9VU36_DROME LP04985p OS=Drosophila melanogaster GN=mRpL20 PE=2 SV=1	0	Both	known285	medium	Both	0.723283	2.55978	1	1	Ribosomal_L20	1	1	1	1	1	0	0	1	0	0	0	0	0	0	10.57	1	NA	2	0	9	8	0	6		7.93607		9.42387	8.99273	8.60607		6.23772		7.69041	7.95134	7.56468
3698	Q9VU68;Q9VU68-2	Actin-interacting protein 1	flr	>sp|Q9VU68|WDR1_DROME Actin-interacting protein 1 OS=Drosophila melanogaster GN=flr PE=2 SV=1;>sp|Q9VU68-2|WDR1_DROME Isoform B of Actin-interacting protein 1 OS=Drosophila melanogaster GN=flr	Validated	Both	known285	low	Both	0.101151	0.0780215	0	1	eIF2A	1	1	0	0	0	1	0	0	0	0	1	0	1	0	6.26	0	NA	3	1	28	8	0	27	7.04025	8.30097		8.99415	10.1818	9.72387	5.49617	6.06974		6.78955	8.6377	8.17981
3709	Q9VUH8			>tr|Q9VUH8|Q9VUH8_DROME CG13472 OS=Drosophila melanogaster GN=CG13472 PE=2 SV=1	0	Both	known285	high	Both	19.4922	5.81441	1	1	SMN	1	1	1	1	1	0	1	1	1	0	0	0	0	0	9.59	0	NA	20	0	14	30	4	15		9.40131	7.31587	10.7306	8.90615	9.46054		6.94183	5.63462	8.26133	7.2249	7.7793
3710	Q9VUH9			>tr|Q9VUH9|Q9VUH9_DROME CG9425, isoform B OS=Drosophila melanogaster GN=CG9425 PE=4 SV=2	0	Both	known285	medium	Both	13.7846	6.08161	0	1	zf.CCCH	1	1	1	0	1	1	1	1	1	0	0	1	1	1	8.11	0	no	11	6	19	31	16	3	7.39681	9.06466	7.85749	9.99014	8.74782	8.75494	5.45232	6.36981	5.91301	7.31201	6.80334	6.81046
3720	Q9VUN9		CG7857-RA	>tr|Q9VUN9|Q9VUN9_DROME CG7857 OS=Drosophila melanogaster GN=CG7857-RA PE=2 SV=1	0	Both	new99	medium	Both	3.26879	0.106352	0	0	NA	NA	0	0	0	0	1	0	0	0	0	0	0	1	0	5.77	0	NA	5	0	9	4	0	14		8.49621		8.68002	8.85144	9.29833		6.58878		6.83846	7.64731	8.09419
3721	Q9VUQ5;Q9VUQ5-2;M9PFK7	Protein argonaute-2	AGO2	>sp|Q9VUQ5|AGO2_DROME Protein argonaute-2 OS=Drosophila melanogaster GN=AGO2 PE=1 SV=3;>sp|Q9VUQ5-2|AGO2_DROME Isoform C of Protein argonaute-2 OS=Drosophila melanogaster GN=AGO2;>tr|M9PFK7|M9PFK7_DROME Argonaute 2, isoform E OS=Drosophila melanogaster GN=	0	Both	known285	medium	365nm (X490) unique	4.77941	YW whole not available	1	1	PAZ;Piwi	1;1	1	0	1	0	0	0	0	0	0	0	0	0	0	9.65	0	NA	4	2	15	35	1	0	6.95276	8.44382	6.3424	10.171	8.63839		5.06629	5.85835	4.45591	7.53754	6.7519
3733	Q9VUV9	Putative U5 small nuclear ribonucleoprotein 200 kDa helicase	CG5931	>sp|Q9VUV9|U520_DROME Putative U5 small nuclear ribonucleoprotein 200 kDa helicase OS=Drosophila melanogaster GN=l(3)72Ab PE=2 SV=4	0	Both	known285	medium	Both	1.14067	6.8871	0	1	DEAD	2	1	1	1	1	1	1	1	0	0	1	0	1	1	5.7	0	NA	11	5	57	26	8	6	7.58086	8.88224	7.26416	9.63283	9.66273	8.36985	5.51267	6.07878	5.19598	6.85722	7.59455	6.30166
3735	Q9VUY4			>tr|Q9VUY4|Q9VUY4_DROME CG5414 OS=Drosophila melanogaster GN=CG5414 PE=3 SV=2	0	Both	known285	high	Both	1.37929	63.6343	0	1	Anticodon_1;tRNA.synt_1	1;1	1	1	1	0	0	0	0	0	0	0	0	0	0	6.97	0	NA	2	1	12	7	1	2	6.63125	8.01062	6.14095	9.69211	8.78078	7.45912	4.94105	5.6573	4.45074	7.29015	7.09058	5.76893
3753	Q9VV75			>tr|Q9VV75|Q9VV75_DROME AT02348p OS=Drosophila melanogaster GN=CG4169 PE=2 SV=1	0	Both	new99	low	Both	0.0328581	0.102958	0	0	NA	NA	0	0	0	0	0	0	0	0	0	0	0	0	0	9.47	0	NA	2	0	21	14	1	24		7.92732	6.6571	9.49406	10.3274	10.0666		5.85612	5.24212	7.38185	8.9124	8.65167
3761	Q9VVA6		nudC	>tr|Q9VVA6|Q9VVA6_DROME Nuclear migration protein NudC OS=Drosophila melanogaster GN=nudC PE=2 SV=2	0	Both	new99	low	Both	0.121559	0.00188825	0	0	NA	NA	0	0	0	0	0	0	0	0	0	0	0	0	0	5.52	0	NA	2	0	21	2	0	25		8.07393		7.50878	9.89372	9.96375		6.08336		5.63512	8.5715	8.64153
3773	Q9VVI1			>tr|Q9VVI1|Q9VVI1_DROME CG7564, isoform A OS=Drosophila melanogaster GN=CG7564 PE=2 SV=1	0	Both	known285	medium	Both	4.92886	0.978659	0	1	LUC7	1	1	1	1	1	0	1	1	1	1	0	0	0	0	9.5	0	NA	2	0	3	8	0	9		8.02652		9.31808	8.24224	8.9256		6.1068		7.37849	6.98698	7.67033
3774	Q9VVI2	Enhancer of mRNA-decapping protein 3	Edc3	>sp|Q9VVI2|EDC3_DROME Enhancer of mRNA-decapping protein 3 OS=Drosophila melanogaster GN=Edc3 PE=1 SV=1	0	Both	known285	high	Both	18.0871	6.57568	0	1	FDF; LSM14	manual	1	1	1	0	0	0	0	0	0	0	0	0	0	8.66	0	NA	19	4	19	22	1	7	7.37712	9.73494	6.79815	10.3685	9.24465	9.07159	5.83305	7.38502	5.25409	8.063	7.70057	7.52753
3786	Q9VVN2	Probable 28S ribosomal protein S26, mitochondrial	mRpS26	>sp|Q9VVN2|RT26_DROME Probable 28S ribosomal protein S26, mitochondrial OS=Drosophila melanogaster GN=mRpS26 PE=2 SV=1	0	Both	known285	low	Both	0.756081	0.0640464	0	1	MRP.S26	1	1	0	1	0	0	0	0	0	0	0	0	0	0	8.5	1	NA	2	0	8	3	0	9		7.77315		8.47591	8.82405	9.32942		6.2266		6.95036	7.92096	8.42633
3795	Q9VVV7			>tr|Q9VVV7|Q9VVV7_DROME CG3808 OS=Drosophila melanogaster GN=CG3808 PE=4 SV=3	0	Both	known285	high	Both	73.4186	234.577	1	1	tRNA_U5.meth_tr	1	1	1	1	1	0	1	0	1	1	0	0	0	0	5.87	0	NA	13	1	6	39	5	4	6.39623	9.43582	7.5526	11.1352	8.36186	8.22963	4.82802	7.08654	5.98439	8.74926	6.79366	6.66144
3803	Q9VW13		CG9330-RA	>tr|Q9VW13|Q9VW13_DROME CG9330 OS=Drosophila melanogaster GN=CG9330-RA PE=2 SV=1	0	Both	Rel_Homo_92	low	Both	0.396452	0.237611	0	0	NA	NA	0	0	1	0	1	0	0	0	0	0	1	0	0	5.92	0	NA	3	2	20	6	0	14	6.83487	8.08651		9.1432	9.39185	9.37833	5.35774	5.93999		6.99461	7.91472	7.90121
3804	Q9VW14	RNA methyltransferase-like protein 1 homolog	CG14100	>sp|Q9VW14|RMTL1_DROME RNA methyltransferase-like protein 1 homolog OS=Drosophila melanogaster GN=CG14100 PE=2 SV=1	0	Both	known285	high	Both	1.22411	446.365	1	1	SpoU_methylase;SpoU_sub_bind	1;1	1	1	1	1	0	1	1	1	0	0	0	0	0	8.32	0	NA	2	1	10	21	0	5	6.04265	8.05855		10.7235	8.87658	7.56872	4.58027	5.92907		8.47355	7.41417	6.10633
3814	Q9VW54		Rpn1	>tr|Q9VW54|Q9VW54_DROME 26S proteasome regulatory complex subunit p97 OS=Drosophila melanogaster GN=Rpn1 PE=2 SV=2	0	Both	new99	low	Both	0.181861	0.362774	0	0	NA	NA	0	0	0	0	1	0	0	0	0	0	1	0	0	5.55	0	NA	5	4	44	19	5	30	7.69623	8.94307	7.05622	9.64042	10.516	9.65527	6.00604	6.51258	5.36603	7.24224	8.82576	7.96508
3818	Q9VW68			>tr|Q9VW68|Q9VW68_DROME CG7433, isoform A OS=Drosophila melanogaster GN=CG7433 PE=3 SV=1	0	Both	new99	low	Both	0.133823	0.116244	0	0	NA	NA	0	0	0	0	0	0	0	0	0	1	0	0	0	8.79	0	NA	6	4	35	15	1	31	7.59906	8.86259	6.77325	9.74505	10.5753	10.2465	6.13666	6.66655	5.31086	7.56698	9.11294	8.78408
3825	Q9VWB8;Q8IQV9		Nup205	>tr|Q9VWB8|Q9VWB8_DROME Nucleoporin 205, isoform A OS=Drosophila melanogaster GN=Nup205 PE=4 SV=2;>tr|Q8IQV9|Q8IQV9_DROME Nucleoporin 205, isoform B OS=Drosophila melanogaster GN=Nup205 PE=4 SV=1	0	Both	new99	medium	Both	0.732782	8.33413	0	0	NA	NA	0	0	0	0	0	0	0	0	0	0	0	0	0	6.22	0	NA	3	2	38	12	1	3	6.76344	8.41972	6.39803	9.07746	9.43069	7.77245	4.74225	5.70154	4.37683	6.38964	7.40949	5.75126
3835	Q9VWE6	Protein ELYS homolog	CG14215	>sp|Q9VWE6|ELYS_DROME Protein ELYS homolog OS=Drosophila melanogaster GN=CG14215 PE=1 SV=2	0	Both	new99	low	Both	0.99487	0.90955	0	0	NA	NA	0	0	0	0	0	0	0	0	0	0	0	0	0	5.18	0	NA	2	0	12	7	1	9		7.67607	6.40565	8.85619	8.6158	8.52946		5.0816	4.44661	6.24677	6.65676	6.57041
3858	Q9VWS1			>tr|Q9VWS1|Q9VWS1_DROME CG6617 OS=Drosophila melanogaster GN=CG6617 PE=2 SV=1	0	Both	new99	low	Both	0.170978	0.0087486	0	0	NA	NA	0	0	0	0	0	0	0	0	0	0	0	0	0	4.94	0	NA	2	0	12	2	1	15		7.64262	6.61481	8.41668	9.34996	10.1391		5.86383	5.46869	6.65244	8.20382	8.99297
3910	Q9VXN4	Probable arginine--tRNA ligase, cytoplasmic	Aats-arg	>sp|Q9VXN4|SYRC_DROME Probable arginine--tRNA ligase, cytoplasmic OS=Drosophila melanogaster GN=Aats-arg PE=2 SV=1	0	Both	known285	low	Both	0.397982	0.0228703	0	1	Arg_tRNA_synt_N;DALR_1;tRNA.synt_1d	1;1;1	1	1	1	0	1	0	0	0	0	0	1	1	0	7.21	0	NA	6	1	35	2	0	18	6.62506	8.65169		7.40403	9.90855	8.78349	4.97184	6.28228		5.20707	8.25534	7.13027
3911	Q9VXP3		mRpS30	>tr|Q9VXP3|Q9VXP3_DROME GH05406p OS=Drosophila melanogaster GN=mRpS30 PE=2 SV=1	0	Both	known285	high	Both	0.434357	71.2302	0	1	PDCD9	1	1	1	1	1	0	1	0	0	1	0	0	0	0	8.53	1	NA	3	1	24	29	2	19	6.81153	8.21983	6.66575	11.5734	9.47448	9.1533	5.36438	6.09223	5.21859	9.27635	8.02731	7.70615
3913	Q9VXQ0		mRpL3	>tr|Q9VXQ0|Q9VXQ0_DROME Mitochondrial ribosomal protein L3 OS=Drosophila melanogaster GN=mRpL3 PE=4 SV=2	0	Both	known285	high	Both	10.5383	1483.58	0	1	Ribosomal_L3	1	1	1	1	1	0	1	1	1	0	1	0	0	0	10.07	1	NA	6	2	12	22	1	1	7.14873	9.48884	6.21861	11.4798	9.25351	7.74789	5.8265	7.38113	4.8964	9.31452	7.93129	6.42568
3915	Q9VXQ5		Tcp-1zeta	>tr|Q9VXQ5|Q9VXQ5_DROME GH13725p OS=Drosophila melanogaster GN=Tcp-1zeta PE=2 SV=1	0	Both	Rel_Homo_92	low	Both	0.144526	0.0967578	0	0	NA	NA	0	0	1	1	0	1	0	0	0	1	0	0	0	6.18	0	NA	5	6	39	18	2	36	7.90575	9.14768	7.32164	10.0536	10.8034	10.612	6.38723	6.87192	5.80314	7.79674	9.2849	9.09353
3918	Q9VXR5			>tr|Q9VXR5|Q9VXR5_DROME CG9281, isoform B OS=Drosophila melanogaster GN=CG9281 PE=2 SV=1	0	Both	Rel_Homo_92	medium	Both	0.852687	5.43859	0	0	NA	NA	0	0	1	0	1	0	0	0	0	0	1	1	0	7.27	0	NA	7	5	26	14	0	14	7.71979	9.05921		9.97146	9.95144	8.78615	6.20126	6.79078		7.72066	8.43292	7.26764
3941	Q9VY48		mRpL38	>tr|Q9VY48|Q9VY48_DROME Mitochondrial ribosomal protein L38 OS=Drosophila melanogaster GN=mRpL38 PE=2 SV=2	0	Both	Rel_Homo_92	medium	Both	1.45704	5.70169	0	0	NA	NA	0	1	1	0	0	0	0	0	0	0	0	0	0	9.09	1	NA	2	0	8	18	0	12		8.33401		10.6165	9.05358	9.36327		6.34309		8.53577	7.75255	8.06224
3943	Q9VY54;Q9VY50		l(1)G0007	>tr|Q9VY54|Q9VY54_DROME LD24737p OS=Drosophila melanogaster GN=l(1)G0007 PE=2 SV=2;>tr|Q9VY50|Q9VY50_DROME Lethal (1) G0007, isoform B OS=Drosophila melanogaster GN=l(1)G0007 PE=4 SV=2	0	Both	known285	medium	Both	5.34453	8.69329	0	1	DEAD;HA2	1;1	1	1	1	1	0	0	1	0	0	1	0	0	0	7.03	0	NA	2	0	9	4	0	1		8.02627		8.64119	8.20685	7.3499		5.59842		6.24319	6.44344	5.58647
3946	Q9VY91		Pdcd4	>tr|Q9VY91|Q9VY91_DROME LD21074p OS=Drosophila melanogaster GN=Pdcd4 PE=2 SV=2	0	Both	known285	low	Both	0.729925	0.467608	0	1	MA3	2	1	1	1	0	0	0	0	0	0	0	0	0	0	5.65	0	NA	3	4	18	11	1	15	7.40606	8.85711	7.06341	9.70865	9.83354	9.60826	6.06363	6.78148	5.72099	7.65324	8.49112	8.26583
3967	Q9VYQ8	Ubiquitin carboxyl-terminal hydrolase 7	Usp7	>sp|Q9VYQ8|UBP7_DROME Ubiquitin carboxyl-terminal hydrolase 7 OS=Drosophila melanogaster GN=Usp7 PE=1 SV=1	0	Both	Rel_Homo_92	low	Both	0.227707	0.56435	0	0	NA	NA	0	0	1	0	0	0	0	0	0	1	0	0	0	5.69	0	NA	2	0	43	11	1	18		8.35426	6.01932	9.04584	9.87825	8.91246		5.89926	4.2559	6.61811	8.11481	7.14903
3971	Q9VYS3	Regulator of nonsense transcripts 1 homolog	Upf1	>sp|Q9VYS3|RENT1_DROME Regulator of nonsense transcripts 1 homolog OS=Drosophila melanogaster GN=Upf1 PE=1 SV=2	0	Both	known285	high	Both	34.5124	1199.98	0	1	UPF1_Zn_bind	1	1	1	1	1	1	1	1	1	1	1	1	1	1	6.99	0	NA	24	8	20	64	55	7	8.13609	9.85406	10.0428	11.6539	9.07328	8.00134	6.33676	7.239	8.24341	8.99873	7.27395	6.20202
3972	Q9VYS4	Poly(A) RNA polymerase gld-2 homolog B	wisp	>sp|Q9VYS4|GLD2B_DROME Poly(A) RNA polymerase gld-2 homolog B OS=Drosophila melanogaster GN=wisp PE=1 SV=1	0	Both	known285	high	Both	100.806	510.095	1	1	PAP_assoc	1	1	1	1	0	0	0	0	0	0	1	0	0	0	8.96	0	NA	15	6	11	32	9	1	7.83741	9.90153	8.07229	10.7722	8.65135	7.55592	6.06655	7.31105	6.30144	8.21024	6.88049	5.78506
3981	Q9VYW4			>tr|Q9VYW4|Q9VYW4_DROME CG1703 OS=Drosophila melanogaster GN=CG1703 PE=2 SV=1	0	Both	Rel_Homo_92	low	Both	0.397897	1.50534	0	0	NA	NA	0	1	1	1	1	1	1	0	1	0	1	0	0	5.61	0	NA	2	1	22	10	0	13	6.53198	8.07122		9.25145	9.37623	8.67687	4.97568	5.84678		7.01574	7.81993	7.12057
3995	Q9VZ55			>tr|Q9VZ55|Q9VZ55_DROME CG1582 OS=Drosophila melanogaster GN=CG1582 PE=2 SV=2	0	Both	known285	high	Both	15.9588	340.597	0	1	DEAD;HA2;zf.CCCH	1;1;1	1	1	1	1	1	1	1	1	0	0	1	1	1	7.1	0	NA	12	0	18	51	8	1		9.24386	7.57664	10.7021	8.8486	7.66639		6.65258	5.75057	8.09008	7.02251	5.84031
4004	Q9VZD8	THUMP domain-containing protein 1 homolog	CG15014	>sp|Q9VZD8|THUM1_DROME THUMP domain-containing protein 1 homolog OS=Drosophila melanogaster GN=CG15014 PE=1 SV=2	0	Both	known285	low	Both	0.904209	1.01191	1	1	THUMP	1	1	1	1	1	0	1	0	1	1	0	0	0	0	5.62	0	NA	3	0	6	8	0	8		7.86065		8.92346	8.8266	8.54544		5.88772		6.94591	7.50438	7.22324
4006	Q9VZE4			>tr|Q9VZE4|Q9VZE4_DROME CG1316 OS=Drosophila melanogaster GN=CG1316 PE=2 SV=2	0	Both	known285	high	Both	45.107	87.1311	1	1	RRM_1	4	1	1	1	1	0	1	1	1	1	0	0	0	0	6.31	0	NA	6	1	4	24	7	4	6.69777	9.14005	7.89115	10.8151	8.30214	8.3632	5.2828	6.96847	6.47618	8.60592	6.88716	6.94822
4025	Q9VZP5;M9NFL1;M9ND37		eIF5B	>tr|Q9VZP5|Q9VZP5_DROME FI21437p1 OS=Drosophila melanogaster GN=eIF5B PE=2 SV=2;>tr|M9NFL1|M9NFL1_DROME eIF5B, isoform D OS=Drosophila melanogaster GN=eIF5B PE=4 SV=1;>tr|M9ND37|M9ND37_DROME eIF5B, isoform E OS=Drosophila melanogaster GN=eIF5B PE=4 SV=1	0	Both	known285	medium	Both	1.20293	6.9276	1	1	GTP_EFTU;GTP_EFTU_D2;IF.2	1;1;1	1	1	1	1	1	1	1	1	0	0	1	1	0	5.41	0	NA	5	2	25	13	0	6	7.29566	8.86634		9.49713	9.62509	8.24157	5.63289	6.46965		7.13691	7.96233	6.5788
4030	Q9VZU7	Ubiquitin carboxyl-terminal hydrolase		>tr|Q9VZU7|Q9VZU7_DROME Ubiquitin carboxyl-terminal hydrolase OS=Drosophila melanogaster GN=CG12082 PE=2 SV=1	0	Both	new99	low	Both	0.316241	0.322704	0	0	NA	NA	0	0	0	0	0	0	0	0	0	0	0	0	0	5.31	0	NA	7	6	43	5	2	21	7.65856	8.89446	6.63749	8.8044	10.2311	8.93147	6.04579	6.54538	5.02469	6.54502	8.61829	7.31869
4035	Q9VZX6		mRpS35	>tr|Q9VZX6|Q9VZX6_DROME LD06441p OS=Drosophila melanogaster GN=mRpS35 PE=2 SV=1	0	Both	known285	medium	Both	2.61495	10.0423	0	1	MRP.S28	1	1	1	1	1	0	0	1	1	1	0	0	0	0	9.15	1	NA	4	0	9	12	1	7		8.41154	6.07361	9.99042	8.8707	8.53739		6.4142	4.77259	7.95572	7.56967	7.23636
4056	Q9W0A8		RpL23A	>tr|Q9W0A8|Q9W0A8_DROME FI01658p OS=Drosophila melanogaster GN=RpL23A PE=1 SV=1	0	Both	known285	low	Both	0.175777	0.253288	0	1	Ribosomal_L23;Ribosomal_L23eN	1;1	1	1	1	1	1	1	1	1	0	1	1	1	0	10.95	1	NA	4	2	14	5	3	11	7.96724	9.06194	7.12866	9.67337	10.6398	9.84183	6.92585	7.2704	6.08728	7.92158	9.59836	8.80044
4063	Q9W0D6			>tr|Q9W0D6|Q9W0D6_DROME CG7879, isoform A OS=Drosophila melanogaster GN=CG7879-RB PE=2 SV=1	0	Both	known285	high	Both	5.38916	150.79	1	1	RRM_6;RRM_1	3;1	1	1	1	1	0	1	1	1	1	0	0	0	0	9.27	0	NA	2	0	2	14	0	1		7.96966		9.99858	8.15134	7.3684		5.70787		7.66224	6.54927	5.76634
4077	Q9W0L7;M9PDK3		CG13903	>tr|Q9W0L7|Q9W0L7_DROME CG32479, isoform A OS=Drosophila melanogaster GN=CG13903 PE=2 SV=2;>tr|M9PDK3|M9PDK3_DROME CG32479, isoform B OS=Drosophila melanogaster GN=CG32479 PE=4 SV=1	Validated	Both	Rel_Homo_92	medium	Both	9.07664	8.69894	0	0	NA	NA	0	1	0	1	1	1	1	1	1	0	1	1	1	6.78	0	NA	8	2	15	23	1	8	6.8014	9.25053	6.35021	10.2462	9.09975	8.83674	5.28289	6.96625	4.8317	7.97522	7.58126	7.31823
4091	Q9W0S6		mRpL17	>tr|Q9W0S6|Q9W0S6_DROME IP18235p OS=Drosophila melanogaster GN=mRpL17 PE=2 SV=2	0	Both	known285	medium	Both	2.47049	17.2661	0	1	Ribosomal_L17	1	1	1	1	0	0	0	0	0	0	0	0	0	0	9.95	1	NA	3	0	8	8	4	5		8.34573	7.96575	10.2615	8.83501	8.55322		6.65487	6.96575	8.50794	7.83501	7.55322
4092	Q9W0S7		Tudor-SN	>tr|Q9W0S7|Q9W0S7_DROME LD20211p OS=Drosophila melanogaster GN=Tudor-SN PE=1 SV=1	0	Both	known285	high	Both	21.5192	160.247	0	1	SNase;TUDOR	4;1	1	1	1	1	0	1	1	1	1	0	0	0	0	8.14	0	no	60	17	66	81	31	48	8.6896	11.4502	8.8126	12.7829	10.7425	9.92185	6.94142	8.75416	7.06442	10.096	8.99426	8.17365
4113	Q9W149		CG11414-RA	>tr|Q9W149|Q9W149_DROME CG11414 OS=Drosophila melanogaster GN=CG11414-RA PE=2 SV=1	0	Both	Rel_Homo_92	high	Both	9.23745	15.2497	0	0	NA	NA	0	1	0	1	1	1	1	1	0	0	0	1	0	9.06	0	yes	11	2	14	21	0	3	6.53656	8.98052		10.1429	8.84449	8.49726	4.8738	6.57436		7.73529	7.18173	6.8345
4114	Q9W158			>tr|Q9W158|Q9W158_DROME CG4612 OS=Drosophila melanogaster GN=CG4612 PE=2 SV=1	0	Both	known285	high	Both	9.07068	257.176	1	1	RRM_1	2	1	1	1	0	1	0	0	0	0	0	1	1	1	9.32	0	NA	2	1	2	11	3	4	6.44601	8.26685	7.74721	11.4267	8.1978	8.45974	5.44601	6.58252	6.74721	9.5875	7.1978	7.45974
4122	Q9W1B9		RpL12	>tr|Q9W1B9|Q9W1B9_DROME RE28824p OS=Drosophila melanogaster GN=RpL12 PE=1 SV=1	0	Both	known285	low	Both	0.129632	0.272459	0	1	Ribosomal_L11;Ribosomal_L11_N	1;1	1	1	1	1	1	0	1	1	0	1	1	1	0	9.21	1	NA	3	3	8	5	4	7	7.64115	8.69258	8.00792	10.0963	10.4332	10.202	6.6869	7.01878	7.05365	8.40061	9.479	9.24778
4135	Q9W1H5		Dcp1	>tr|Q9W1H5|Q9W1H5_DROME Decapping protein 1, isoform A OS=Drosophila melanogaster GN=Dcp1 PE=1 SV=1	0	Both	known285	medium	Both	2.25082	1.5479	0	1	DCP1	1	1	1	1	0	0	0	0	0	0	0	0	0	0	6.67	0	NA	4	5	13	8	0	11	7.79354	8.81999		9.55843	9.31046	8.9492	6.51479	6.81111		7.57772	8.03169	7.67045
4136	Q9W1H8		Thiolase	>tr|Q9W1H8|Q9W1H8_DROME GH13256p OS=Drosophila melanogaster GN=Thiolase PE=2 SV=1	0	Both	Rel_Homo_92	low	Both	0.968211	0.424439	0	0	NA	NA	0	0	0	1	0	1	0	0	0	1	0	0	0	9.25	0	NA	5	6	20	14	5	19	7.88678	9.51182	7.7441	10.1445	10.3114	10.0542	6.47182	7.30946	6.32911	7.98454	8.89642	8.6392
4138	Q9W1I0;Q8SXP8		TBPH	>tr|Q9W1I0|Q9W1I0_DROME TBPH, isoform A OS=Drosophila melanogaster GN=TBPH PE=4 SV=2;>tr|Q8SXP8|Q8SXP8_DROME GH09868p OS=Drosophila melanogaster GN=TBPH PE=2 SV=1	0	Both	known285	high	Both	70.8701	2981.86	1	1	RRM_1	2	1	1	1	1	0	1	1	1	1	0	0	0	0	6.03	0	NA	3	0	1	17	2	1		8.11761	6.96983	11.2679	7.16811	7.24839		6.33169	5.85588	9.32648	6.05415	6.13446
4143	Q9W1K4		egl	>tr|Q9W1K4|Q9W1K4_DROME Egalitarian OS=Drosophila melanogaster GN=egl PE=4 SV=4	0	Both	known285	medium	Both	7.93488	10.2782	1	0	NA	NA	1	0	1	0	0	0	0	0	0	0	0	0	0	6.9	0	NA	13	0	17	23	1	11		9.12142	0	10.1546	9.03973	8.6794		6.70359		7.7461	7.37698	7.01666
4152	Q9W1V3	rRNA 2-O-methyltransferase fibrillarin	Fib	>sp|Q9W1V3|FBRL_DROME rRNA 2-O-methyltransferase fibrillarin OS=Drosophila melanogaster GN=Fib PE=2 SV=1	0	Both	known285	high	Both	17.2792	80.0952	1	1	Fibrillarin	1	1	1	1	1	1	1	1	1	1	1	1	1	0	10.29	0	NA	9	6	12	19	1	6	7.92469	9.99212	6.98437	11.0545	9.50037	8.62159	6.64594	7.88622	5.70562	8.96397	8.22162	7.34284
4165	Q9W237	40S ribosomal protein S16	RpS16	>sp|Q9W237|RS16_DROME 40S ribosomal protein S16 OS=Drosophila melanogaster GN=RpS16 PE=1 SV=1	0	Both	known285	low	Both	1.04775	0.756168	0	1	Ribosomal_S9	1	1	1	1	1	1	0	1	1	1	1	0	1	0	10.17	1	NA	8	5	15	15	6	12	8.51042	9.97521	8.08203	10.9956	10.7022	10.592	7.46904	8.10809	7.04064	9.14672	9.66076	9.55057
4171	Q9W254		qkr58E-2	>tr|Q9W254|Q9W254_DROME Quaking related 58E-2 OS=Drosophila melanogaster GN=qkr58E-2 PE=2 SV=1	0	Both	known285	high	Both	115.593	72.379	1	1	KH_3	1	1	1	1	1	1	1	1	1	1	0	0	1	0	9.65	0	NA	6	0	4	10	0	4		9.49709		10.6912	8.22092	8.32889		7.48047		8.67558	6.99046	7.09844
4172	Q9W255		qkr58E-1	>tr|Q9W255|Q9W255_DROME GH05812p OS=Drosophila melanogaster GN=qkr58E-1 PE=2 SV=1	0	Both	known285	high	Both	17.0132	56.9076	1	1	KH_1	1	1	1	1	1	1	1	1	1	1	0	0	1	0	9.1	0	NA	4	0	4	12	0	2		8.53948		9.94176	8.17473	7.73895		6.55383		7.9329	6.89597	6.46021
4196	Q9W2K2		LSm1	>tr|Q9W2K2|Q9W2K2_DROME IP04848p OS=Drosophila melanogaster GN=LSm1 PE=2 SV=1	0	Both	known285	low	Both	0.408008	1.09115	0	1	LSM	1	1	1	1	1	1	1	1	1	0	0	1	0	0	5.29	0	NA	2	0	7	9	1	8		7.63609	6.6255	9.42267	8.96624	8.97526		6.15887	5.7804	7.88559	8.12113	8.13017
4222	Q9W334	40S ribosomal protein S28	RpS28b	>sp|Q9W334|RS28_DROME 40S ribosomal protein S28 OS=Drosophila melanogaster GN=RpS28b PE=1 SV=2	0	Both	known285	low	Both	0.15798	0.0390497	0	1	Ribosomal_S28e	1	1	1	1	1	1	1	1	1	0	1	1	1	0	10.38	1	NA	3	0	5	3	0	6		8.64466		9.71925	10.3034	10.6963		7.45194		8.52836	9.82626	10.2192
4227	Q9W362		Larp7	>tr|Q9W362|Q9W362_DROME LD09531p OS=Drosophila melanogaster GN=Larp7 PE=2 SV=1	0	Both	known285	medium	Both	5.13459	3.7161	0	1	La;RRM_1;RRM_3	1;1;1	1	1	1	1	1	1	1	1	1	0	1	1	0	6.91	0	NA	4	0	12	19	0	11		8.67479		10.5129	8.81912	9.45324		6.49429		8.27846	7.35671	7.99084
4243	Q9W3C1	Polycomb protein l(1)G0020	l(1)G0020	>sp|Q9W3C1|U202_DROME Polycomb protein l(1)G0020 OS=Drosophila melanogaster GN=l(1)G0020 PE=1 SV=2	0	Both	known285	medium	Both	2.70749	0.947186	0	1	tRNA_bind_2	1	1	1	1	1	1	1	1	1	1	1	1	0	0	8.74	0	NA	2	0	10	2	0	1		7.91535		8.3187	8.40049	8.01381		5.55256		6.00022	6.69292	6.30625
4260	Q9W3L1		Upf2	>tr|Q9W3L1|Q9W3L1_DROME RE04053p OS=Drosophila melanogaster GN=Upf2 PE=2 SV=1	0	Both	known285	medium	Both	3.26519	3.71261	1	1	MIF4G;Upf2	3;1	1	1	1	0	1	0	0	0	0	0	0	1	0	5.46	0	NA	3	0	12	11	0	5		8.07393		9.34651	8.46458	8.37291		5.63471		6.88927	6.69373	6.60206
4263	Q9W3M7			>tr|Q9W3M7|Q9W3M7_DROME CG10777 OS=Drosophila melanogaster GN=CG10777 PE=2 SV=1	0	Both	known285	high	Both	94.8765	100.202	0	1	DEAD	1	1	1	1	1	1	1	1	1	1	0	1	1	0	9.21	0	NA	19	3	22	31	17	17	7.2683	10.5872	8.68086	11.6587	9.30653	9.08408	5.70011	8.14258	7.11267	9.23426	7.73834	7.51586
4284	Q9W3W6			>tr|Q9W3W6|Q9W3W6_DROME CG14438, isoform A OS=Drosophila melanogaster GN=CG14438 PE=4 SV=2	0	Both	new99	NA		X490 whole not available	YW whole not available	0	0	NA	NA	0	0	0	0	0	0	0	0	0	0	0	0	0	7.95	0	yes	7	6	0	5	7	0	7.52869	9.01793	7.26373	8.5693			5.3497	6.09244	5.08475	5.76101
4328	Q9W4M7;E1JJD6		tyf	>tr|Q9W4M7|Q9W4M7_DROME Twenty-four, isoform B OS=Drosophila melanogaster GN=tyf PE=4 SV=1;>tr|E1JJD6|E1JJD6_DROME Twenty-four, isoform F OS=Drosophila melanogaster GN=tyf PE=4 SV=2	0	Both	Rel_Homo_92	medium	Both	7.2983	0.757164	0	0	NA	NA	0	0	1	0	0	0	0	0	0	0	0	0	0	6.23	0	NA	7	3	23	19	4	27	7.13944	9.36959	7.07867	9.81075	9.30367	9.49353	5.3006	6.75513	5.23982	7.25139	7.46483	7.65468
4330	Q9W4M9	tRNA (cytosine(34)-C(5))-methyltransferase	CG6133	>sp|Q9W4M9|NSUN2_DROME tRNA (cytosine(34)-C(5))-methyltransferase OS=Drosophila melanogaster GN=Nsun2 PE=2 SV=1	0	Both	known285	high	Both	9.53134	17.864	1	1	Nol1_Nop2_Fmu	1	1	1	1	1	1	1	1	1	1	0	1	1	0	6.4	0	NA	17	4	24	30	20	11	7.39171	9.58234	8.3598	10.3105	9.38288	8.58381	5.75824	7.15564	6.72632	7.91985	7.74941	6.95035
4338	Q9W4X7;Q9VDM6	Eukaryotic translation initiation factor 3 subunit G-1	eIF3-S4-1	>sp|Q9W4X7|EI3G1_DROME Eukaryotic translation initiation factor 3 subunit G-1 OS=Drosophila melanogaster GN=eIF3-S4-1 PE=1 SV=1	0	Both	known285	medium	Both	3.70922	4.00356	1	1	eIF3g;RRM_1	1;1	1	1	1	1	1	1	1	1	1	1	1	1	0	8.91	0	NA	7	1	11	13	3	10	6.98638	9.51027	7.59284	10.9164	9.72665	9.79471	5.9072	7.64383	6.51366	9.03551	8.64747	8.71554
4350	Q9W547		mRpL16	>tr|Q9W547|Q9W547_DROME LD21404p OS=Drosophila melanogaster GN=mRpL16 PE=2 SV=1	0	Both	known285	medium	365nm (X490) unique	2.69077	YW whole not available	1	1	Ribosomal_L16	1	1	1	1	0	0	0	0	0	0	0	0	0	0	10.17	1	NA	3	1	10	8	0	0	6.78796	8.64091		9.81359	9.06867		5.53269	6.67034		7.83763	7.81339
4357	Q9W590	Large subunit GTPase 1 homolog	ns3	>sp|Q9W590|LSG1_DROME Large subunit GTPase 1 homolog OS=Drosophila melanogaster GN=Ns3 PE=1 SV=1	0	Both	known285	medium	Both	1.46077	6.14948	0	1	MMR_HSR1	1	1	1	1	0	1	0	0	0	1	0	1	1	1	7.31	0	NA	4	3	19	11	0	8	6.83466	8.1916		9.07952	8.92185	7.90636	5.27834	5.9572		6.85642	7.36554	6.35005
4358	Q9W592		EG:BACN32G11.3	>tr|Q9W592|Q9W592_DROME CG14786 OS=Drosophila melanogaster GN=EG:BACN32G11.3 PE=4 SV=1	0	Both	known285	high	Both	27.1568	1735.77	0	1	PPR	1	1	1	0	1	0	1	1	1	1	0	0	0	0	8.46	0	NA	11	2	12	49	1	2	6.77661	9.06672	6.45425	11.0158	8.45523	7.24974	4.98422	6.52379	4.66186	8.41437	6.66283	5.45735
4362	Q9W5D3		EG:34F3.4	>tr|Q9W5D3|Q9W5D3_DROME CG16989 OS=Drosophila melanogaster GN=EG:34F3.4 PE=2 SV=2	0	Both	Rel_Homo_92	medium	365nm (X490) unique	4.34195	YW whole not available	0	0	NA	NA	0	0	0	1	0	0	1	0	0	0	0	0	0	6.51	0	NA	2	1	7	9	0	0	6.46727	7.87184		9.19631	8.15546		4.77708	5.53001		6.83075	6.46525
4373	R9Q794;Q9W5R8;Q6NL81	60S ribosomal protein L5	RpL5	>tr|R9Q794|R9Q794_DROME Ribosomal protein L5, isoform G OS=Drosophila melanogaster GN=RpL5 PE=3 SV=1;>sp|Q9W5R8|RL5_DROME 60S ribosomal protein L5 OS=Drosophila melanogaster GN=RpL5 PE=1 SV=2;>tr|Q6NL81|Q6NL81_DROME RE57391p OS=Drosophila melanogaster GN=R	0	Both	known285	medium	Both	0.234837	13.6166	1	1	Ribosomal_L18p	1	1	1	1	1	1	1	1	1	1	1	1	1	0	9.79	1	NA	3	4	17	17	5	13	8.2352	9.31306	7.79289	11.1869	10.7443	9.51376	7.19382	7.50074	6.75149	9.32397	9.7029	8.47238
4385	Q9XYP8	Gamma-tubulin complex component 3 homolog	l(1)dd4	>sp|Q9XYP8|GCP3_DROME Gamma-tubulin complex component 3 homolog OS=Drosophila melanogaster GN=l(1)dd4 PE=1 SV=2	0	Both	new99	low	Both	0.513014	1.24642	0	0	NA	NA	0	0	0	0	0	0	0	0	0	0	0	0	0	6.99	0	NA	3	0	22	6	0	7		8.15309		8.85886	9.34098	8.3951		5.84471		6.57482	7.70751	6.76163
4387	Q9XYU0	DNA replication licensing factor Mcm7	Mcm7	>sp|Q9XYU0|MCM7_DROME DNA replication licensing factor Mcm7 OS=Drosophila melanogaster GN=Mcm7 PE=1 SV=1	0	Both	new99	medium	Both	0.307625	2.34756	0	0	NA	NA	0	0	0	0	0	0	0	0	0	0	0	0	0	6.55	0	NA	5	3	34	7	0	8	7.54459	8.57317		8.93507	9.9484	8.19075	5.94253	6.26143		6.67683	8.34633	6.58869
4388	Q9XYU1	DNA replication licensing factor Mcm3	Mcm3	>sp|Q9XYU1|MCM3_DROME DNA replication licensing factor Mcm3 OS=Drosophila melanogaster GN=Mcm3 PE=1 SV=1	0	Both	new99	low	Both	0.307055	0.346547	0	0	NA	NA	0	0	0	0	1	0	0	0	0	0	1	0	0	6	0	NA	4	5	37	12	2	22	7.34331	8.66456	6.8646	9.35143	10.033	9.40737	5.65312	6.25713	5.17441	6.97447	8.34284	7.71718
4395	Q9XZ03;M9PFR6		mbf1	>tr|Q9XZ03|Q9XZ03_DROME Multiprotein Bridging Factor 1 OS=Drosophila melanogaster GN=mbf1 PE=2 SV=1;>tr|M9PFR6|M9PFR6_DROME Multiprotein bridging factor 1, isoform E OS=Drosophila melanogaster GN=mbf1 PE=4 SV=1	Validated	Both	Rel_Homo_92	medium	Both	1.11118	2.15837	0	0	NA	NA	0	0	1	1	1	1	1	1	1	0	1	0	0	10.04	0	yes	3	0	10	8	0	8		8.61969		10.2613	9.43329	9.45606		7.00307		8.60463	8.53021	8.55297
[truncated: 38 more columns]

## Sheet: early embryo Proteome
id	Protein IDs	Protein names	Gene names	Fasta headers	Validation candidates	RBPome unique or overlap (>2 peptides, 10-fold enrichment)	Whole proteome (>1 peptide)	X490-RBP enrichment over whole proteome	YW-RBP enrichment over whole proteome	"RNA_binding" in GOMF	RNA binding domain (Pfam)	RBDs	No_of_RBDs_in_order	Known RBP - RNA binding domain (Pfam), RNA binding (GOMF)	Orthologue_to_human_RBPcensus	"RNA_related" in GOMF	Overlap with Costello et al., Cell 2012 (HeLa)	Overlap with Baltz et al., MolCell 2012 (HEK293)	Overlap with Kwon et al., NSMB 2013 (Mouse ESC)	Overlap with Matia-González et al., NSMB 2015 (Yeast)	Overlap with Matia-González et al., NSMB 2015 (C.elegans)	Overlap with Beckmann et al., Nat. Commu 2015 (HUH-7)	Overlap with Beckmann et al., Nat. Commu 2015 (Yeast)	Overlap with Mitchel et al., NSMB 2012 (Yeast)	Isoelectric point (pI)	Ribosomal_Protein	TF_annotation_FlyTF	Razor + unique peptides 365nm CL_X490_oligodT pulldown	Razor + unique peptides no CL_X490_oligodT pulldown	Razor + unique peptides X490_whole proteme measurement	Razor + unique peptides 254nm CL_YW_oligodT pulldown	Razor + unique peptides no CL_YW_oligodT pulldown	Razor + unique peptides YW_whole proteme measurement	Log10 intensity no CL_X490_oligodT pulldown	Log10 intensity 365nm CL_X490_oligodT pulldown	Log10 intensity no CL_YW_oligodT pulldown	Log10 intensity 254nm CL_YW_oligodT pulldown	Log10 intensity X490_whole proteme measurement	Log10 intensity YW_whole proteme measurement	Log10 iBAQ no CL_X490_oligodT pulldown	Log10 iBAQ 365nm CL_X490_oligodT pulldown	Log10 iBAQ no CL_YW_oligodT pulldown	Log10 iBAQ 254nm CL_YW_oligodT pulldown	Log10 iBAQ X490_whole proteme measurement	Log10 iBAQ YW_whole proteme measurement	Mol. weight [kDa]	Sequence lengths	PEP	Sequence coverage 365nm CL_X490_oligodT pulldown [%]
0	A0AQH0	Proteasome subunit beta type	Prosbeta1	>tr|A0AQH0|A0AQH0_DROME Proteasome subunit beta type OS=Drosophila melanogaster GN=Prosbeta1 PE=2 SV=1	0	254nm (YW) unique	Both	0	0.0241474	0	0	NA	NA	0	0	0	0	0	0	0	0	0	0	0	5.09	0	NA	0	0	13	3	0	11				8.66658	10.0472	9.92972				7.03011	9.04724	8.92972	24.264	224	0	0
1	A1A708;A1A708-2	Uncharacterized protein CG4951	CG4951	>sp|A1A708|Y4951_DROME Uncharacterized protein CG4951 OS=Drosophila melanogaster GN=CG4951 PE=1 SV=1;>sp|A1A708-2|Y4951_DROME Isoform A of Uncharacterized protein CG4951 OS=Drosophila melanogaster GN=CG4951	0	254nm (YW) unique	Both	0	0.153522	0	0	NA	NA	0	0	0	0	0	0	0	0	0	0	0	9.48	0	NA	0	0	7	3	0	7				8.04789	8.37999	8.55317				6.04191	6.96502	7.13821	50.753	446;320	7.7697e-56	0
2	A1YK02		Nup75	>tr|A1YK02|A1YK02_DROME Nup75 OS=Drosophila melanogaster GN=Nup75 PE=4 SV=1	0		Both	0	0.0647882	0	0	NA	NA	0	0	0	NA	NA	NA	N/A	N/A	N/A	N/A	N/A	5.7	0	NA	0	0	19	1	0	7				6.98764	9.2584	7.94546				4.90628	7.69019	6.37725	76.871	668	1.5638e-146	0
3	Q8IMQ1;P48607-2;P48607-10;Q8IMP8;P48607-9;A1Z0H7;P48607-5;Q8IG88;P48607-3;P48607;P48607-8;P48607-7;Q8IMQ0	Protein spaetzle;Protein spaetzle C-106	spz	>tr|Q8IMQ1|Q8IMQ1_DROME Spatzle, isoform F OS=Drosophila melanogaster GN=spz PE=4 SV=1;>sp|P48607-2|SPZ_DROME Isoform 8.20 of Protein spaetzle OS=Drosophila melanogaster GN=spz;>sp|P48607-10|SPZ_DROME Isoform 11.15 of Protein spaetzle OS=Drosophila melanog	0		Both	0	0	0	0	NA	NA	0	0	0	NA	NA	NA	N/A	N/A	N/A	N/A	N/A	5.9	0	NA	0	0	2	0	0	1					7.91117	7.52979					6.95692	6.57555	19.822	174;227;243;244;253;270;273;290;300;326;163;175;181	5.2242e-11	0
4	A1Z6E0-5;A1Z6E0-3;A1Z6E0-2;A1Z6E0-4;A1Z6E0	Protein gustavus	gus	>sp|A1Z6E0-5|GUS_DROME Isoform F of Protein gustavus OS=Drosophila melanogaster GN=gus;>sp|A1Z6E0-3|GUS_DROME Isoform B of Protein gustavus OS=Drosophila melanogaster GN=gus;>sp|A1Z6E0-2|GUS_DROME Isoform A of Protein gustavus OS=Drosophila melanogaster GN	0	Both	365nm (X490) unique	5.3818	YW whole not available	0	0	NA	NA	0	0	1	0	0	0	0	0	0	0	0	9.56	0	NA	2	0	6	5	0	0		8.2974		8.88293	8.45254			6.4966		7.11661	7.3386		31.957	281;343;349;351;363	1.6064e-26	8.9
5	A1Z6E6;Q7K3G5;Q0E9P4		d4	>tr|A1Z6E6|A1Z6E6_DROME D4, isoform C OS=Drosophila melanogaster GN=d4 PE=4 SV=1;>tr|Q7K3G5|Q7K3G5_DROME D4, isoform A OS=Drosophila melanogaster GN=d4 PE=2 SV=1	0		Both	0	0	0	0	NA	NA	0	0	0	NA	NA	NA	N/A	N/A	N/A	N/A	N/A	8.03	0	maybe	0	0	2	0	0	1					7.57975	7.21043					6.37563	6.00629	55.12	495;497;339	1.4122e-09	0
6	A1Z6G4		CG17508-RA	>tr|A1Z6G4|A1Z6G4_DROME CG17508 OS=Drosophila melanogaster GN=CG17508-RA PE=2 SV=1	0		Both	0	0	0	0	NA	NA	0	0	0	NA	NA	NA	N/A	N/A	N/A	N/A	N/A	9.46	0	NA	0	0	1	0	0	1					8.09906	7.4218					7.14479	6.46756	35.184	321	0.0001019	0
7	A1Z6G6			>tr|A1Z6G6|A1Z6G6_DROME CG1344 OS=Drosophila melanogaster GN=CG1344 PE=4 SV=1	0		Both	0	0	0	0	NA	NA	0	0	0	NA	NA	NA	N/A	N/A	N/A	N/A	N/A	5.3	0	NA	0	0	5	0	0	1					7.73723	7.53486					6.18093	5.97855	77.85	683	1.774e-10	0
8	Q7K1T1;A1Z6H3;A1Z6H4		vlc	>tr|Q7K1T1|Q7K1T1_DROME LD44824p OS=Drosophila melanogaster GN=vlc PE=2 SV=1;>tr|A1Z6H3|A1Z6H3_DROME Vulcan, isoform D OS=Drosophila melanogaster GN=vlc PE=4 SV=1;>tr|A1Z6H4|A1Z6H4_DROME RE52822p OS=Drosophila melanogaster GN=vlc PE=2 SV=1	0		Both	0.261148	0.026515	0	0	NA	NA	0	0	0	NA	NA	NA	N/A	N/A	N/A	N/A	N/A	6.17	0	NA	1	0	9	1	0	8		7.35279		7.84935	8.90018	9.13188		5.3462		5.87496	7.50224	7.73394	66.172	605;634;583	1.6729e-163	3.3
9	A1Z6H6			>tr|A1Z6H6|A1Z6H6_DROME CG7791 OS=Drosophila melanogaster GN=CG7791 PE=3 SV=1	0		365nm (X490) unique	0	NA	0	0	NA	NA	0	0	0	NA	NA	NA	N/A	N/A	N/A	N/A	N/A	6.39	0	NA	0	1	9	0	0	0	6.08707				8.3863		4.47429				6.77352		80.235	699	4.7567e-25	0
10	A1Z6H7		gp210	>tr|A1Z6H7|A1Z6H7_DROME Gp210 OS=Drosophila melanogaster GN=Gp210 PE=4 SV=1	0		Both	0	0	0	0	NA	NA	0	0	0	NA	NA	NA	N/A	N/A	N/A	N/A	N/A	6.03	0	NA	0	0	40	0	0	17					9.62673	8.57073					7.66295	6.60695	209.79	1876	0	0
11	A1Z6I7		BubR1	>tr|A1Z6I7|A1Z6I7_DROME Bub1-related kinase OS=Drosophila melanogaster GN=BubR1 PE=4 SV=1	0	365nm (X490) unique	Both	2.31671	0.0063683	0	0	NA	NA	0	0	0	0	0	0	0	0	0	0	0	5.93	0	NA	6	4	29	1	1	19	7.2955	8.70484	6.26378	6.98627	9.19229	8.95165	5.42045	6.10917	4.38872	4.59816	7.31723	7.0766	165.06	1460	1.1817e-200	6
12	A1Z6J5;A1Z6J4		tbce	>tr|A1Z6J5|A1Z6J5_DROME CG7861, isoform B OS=Drosophila melanogaster GN=tbce PE=2 SV=1;>tr|A1Z6J4|A1Z6J4_DROME CG7861, isoform A OS=Drosophila melanogaster GN=tbce PE=4 SV=1	0		Both	0	0	0	0	NA	NA	0	0	0	NA	NA	NA	N/A	N/A	N/A	N/A	N/A	6.15	0	NA	0	0	8	0	0	1					8.39804	6.84641					6.92093	5.36929	59.423	523;542	3.0596e-58	0
13	A1Z6L9		Trap1	>tr|A1Z6L9|A1Z6L9_DROME FI21274p1 OS=Drosophila melanogaster GN=Trap1 PE=2 SV=1	0	Both	Both	0.888099	0.170844	0	0	NA	NA	0	0	1	1	0	0	1	0	0	0	0	7.24	0	NA	7	1	29	4	0	21	6.23737	8.82853		8.79985	9.72216	9.20347	4.6463	6.50664		6.56253	8.13111	7.6124	77.962	691	1.2204e-149	11.4
14	A1Z6M0		Bap170	>tr|A1Z6M0|A1Z6M0_DROME Brahma associated protein 170kD OS=Drosophila melanogaster GN=Bap170 PE=2 SV=1	0		Both	0	0	0	0	NA	NA	0	0	1	NA	NA	NA	N/A	N/A	N/A	N/A	N/A	8.69	0	yes	0	0	11	0	0	5					8.49322	8.29649					6.5956	6.39886	183.03	1688	2.0977e-24	0
15	A1Z6M6		Dpit47	>tr|A1Z6M6|A1Z6M6_DROME DNA polymerase interacting tpr containing protein of 47kD OS=Drosophila melanogaster GN=Dpit47 PE=2 SV=1	0		Both	0	0	0	0	NA	NA	0	0	0	NA	NA	NA	N/A	N/A	N/A	N/A	N/A	5.76	0	NA	0	1	11	0	0	6	6.5394				8.96927	8.37411	5.23837				7.66824	7.07309	46.906	396	1.1766e-53	0
16	A1Z6Q0		koi	>tr|A1Z6Q0|A1Z6Q0_DROME CG3287, isoform B OS=Drosophila melanogaster GN=koi PE=4 SV=1	0		Both	0	0	0	0	NA	NA	0	0	0	NA	NA	NA	N/A	N/A	N/A	N/A	N/A	9.13	0	NA	0	0	2	0	0	7					7.58876	8.56322					6.14161	7.11608	51.754	449	1.9635e-25	0
17	Q7JUN9;A1Z6R8			>tr|Q7JUN9|Q7JUN9_DROME CG3358, isoform A OS=Drosophila melanogaster GN=CG3358 PE=2 SV=1;>tr|A1Z6R8|A1Z6R8_DROME CG3358, isoform C OS=Drosophila melanogaster GN=CG3358 PE=4 SV=2	0		365nm (X490) unique	0	NA	0	0	NA	NA	0	0	1	NA	NA	NA	N/A	N/A	N/A	N/A	N/A	5.78	0	NA	0	0	1	0	0	0					7.05019						5.74917		33.007	291;306	0.00047257	0
18	E1JGY9;A8DY50;A1Z6S0		mim	>tr|E1JGY9|E1JGY9_DROME CG33558, isoform D OS=Drosophila melanogaster GN=mim PE=4 SV=1;>tr|A8DY50|A8DY50_DROME CG33558, isoform B OS=Drosophila melanogaster GN=mim PE=4 SV=1;>tr|A1Z6S0|A1Z6S0_DROME CG33558, isoform C OS=Drosophila melanogaster GN=mim PE=4	0		Both	0	0	0	0	NA	NA	0	0	0	NA	NA	NA	N/A	N/A	N/A	N/A	N/A	9.29	0	NA	0	0	2	0	0	1					9.41103	9.95533					7.89251	8.43681	101.57	950;1654;2027	4.5378e-06	0
19	A1Z6S6;A1Z6S7		vimar	>tr|A1Z6S6|A1Z6S6_DROME RE54322p OS=Drosophila melanogaster GN=vimar PE=2 SV=1;>tr|A1Z6S7|A1Z6S7_DROME FI02061p OS=Drosophila melanogaster GN=vimar PE=2 SV=1	0	365nm (X490) unique	Both	2.06212	80.3658	0	0	NA	NA	0	0	0	0	0	0	0	0	0	0	0	5.05	0	NA	2	0	20	1	1	17		8.55516	7.57766	11.2104	9.10558	8.76453		6.31549	6.04618	8.85565	7.5741	7.23305	70.253	634;635	6.0782e-112	2.7
20	A1Z6V5		Spn43Ab	>tr|A1Z6V5|A1Z6V5_DROME FI01422p OS=Drosophila melanogaster GN=Spn43Ab PE=2 SV=1	0		Both	0	0	0	0	NA	NA	0	0	0	NA	NA	NA	N/A	N/A	N/A	N/A	N/A	8.39	0	NA	0	0	8	0	0	9					8.50875	8.72385					7.12853	7.34364	43.378	393	3.7431e-60	0
21	A1Z6X6			>tr|A1Z6X6|A1Z6X6_DROME CG1707 OS=Drosophila melanogaster GN=CG1707 PE=4 SV=1	0		Both	0	0	0	0	NA	NA	0	0	0	NA	NA	NA	N/A	N/A	N/A	N/A	N/A	6.07	0	NA	0	0	11	0	0	12					9.73642	9.88467					8.73642	8.88467	20.045	176	0	0
22	A1Z6Z3;Q7JR61;A4UZ69;A1Z6Z4;Q8T0K8	Aldehyde dehydrogenase	Aldh-III	>tr|A1Z6Z3|A1Z6Z3_DROME Aldehyde dehydrogenase OS=Drosophila melanogaster GN=Aldh-III PE=2 SV=1;>tr|Q7JR61|Q7JR61_DROME Aldehyde dehydrogenase OS=Drosophila melanogaster GN=Aldh-III PE=2 SV=1;>tr|A4UZ69|A4UZ69_DROME Aldehyde dehydrogenase type III, isoform	0		Both	0	0	0	0	NA	NA	0	0	0	NA	NA	NA	N/A	N/A	N/A	N/A	N/A	7.9	0	NA	0	1	15	0	0	5	6.4141				9.36333	7.93603	5.01616				7.96539	6.53808	55.735	497;498;563;563;337	1.5708e-124	0
23	A1Z6Z7;E1JGZ3			>tr|A1Z6Z7|A1Z6Z7_DROME CG1620, isoform A OS=Drosophila melanogaster GN=CG1620 PE=4 SV=1;>tr|E1JGZ3|E1JGZ3_DROME CG1620, isoform B OS=Drosophila melanogaster GN=CG1620 PE=4 SV=1	0		Both	0	0	0	0	NA	NA	0	0	0	NA	NA	NA	N/A	N/A	N/A	N/A	N/A	4.45	0	yes	0	0	4	0	0	5					8.14879	8.44212					6.91833	7.21165	63.981	586;457	1.8442e-50	0
24	A1Z6Z9;A1Z6Z8;A1Z700		didum	>tr|A1Z6Z9|A1Z6Z9_DROME Dilute class unconventional myosin, isoform A OS=Drosophila melanogaster GN=didum PE=4 SV=1;>tr|A1Z6Z8|A1Z6Z8_DROME Dilute class unconventional myosin, isoform C OS=Drosophila melanogaster GN=didum PE=4 SV=1;>tr|A1Z700|A1Z700_DROME	0		Both	0	0	0	0	NA	NA	0	0	1	NA	NA	NA	N/A	N/A	N/A	N/A	N/A	8.6	0	NA	0	0	8	0	0	1					8.4139	9.25181					6.40106	7.23897	207.26	1792;1800;1196	2.5066e-14	0
25	A1Z713		Vps13	>tr|A1Z713|A1Z713_DROME Vacuolar protein sorting 13 OS=Drosophila melanogaster GN=Vps13 PE=4 SV=2	0		Both	8.30813	2040.56	0	0	NA	NA	0	0	0	NA	NA	NA	N/A	N/A	N/A	N/A	N/A	5.59	0	NA	1	1	28	2	1	1	9.13767	8.80798	9.96863	10.7104	8.73227	6.8966	6.85436	5.79555	7.68533	7.64058	6.44897	4.6133	374.54	3321	2.9732e-67	0.2
26	A1Z729			>tr|A1Z729|A1Z729_DROME CG2064 OS=Drosophila melanogaster GN=CG2064 PE=3 SV=1	0		365nm (X490) unique	0	NA	0	0	NA	NA	0	0	0	NA	NA	NA	N/A	N/A	N/A	N/A	N/A	8.86	0	NA	0	0	2	0	0	0					7.59659						6.27437		36.581	330	5.5042e-09	0
27	A1Z742;A1Z741;Q7JUR6	Protein GDAP2 homolog	CG18812-RA;CG18812	>tr|A1Z742|A1Z742_DROME CG18812, isoform A OS=Drosophila melanogaster GN=CG18812-RA PE=2 SV=1;>tr|A1Z741|A1Z741_DROME CG18812, isoform B OS=Drosophila melanogaster GN=CG18812 PE=4 SV=1;>sp|Q7JUR6|GDAP2_DROME Protein GDAP2 homolog OS=Drosophila melanogaster	0		Both	0	0	0	0	NA	NA	0	0	0	NA	NA	NA	N/A	N/A	N/A	N/A	N/A	5.5	0	NA	0	0	1	0	0	3					7.67362	7.90146					6.63222	6.86007	24.978	217;244;540	9.3113e-09	0
28	A1Z743;A1Z745;Q8SXN9		CG1383	>tr|A1Z743|A1Z743_DROME CG30497, isoform A OS=Drosophila melanogaster GN=CG30497 PE=4 SV=1;>tr|A1Z745|A1Z745_DROME CG30497, isoform C OS=Drosophila melanogaster GN=CG30497 PE=4 SV=1;>tr|Q8SXN9|Q8SXN9_DROME CG30497, isoform B OS=Drosophila melanogaster GN=C	1	Both	365nm (X490) unique	X490 whole not available	YW whole not available	0	1	DUF1693	manual	1	1	0	1	0	0	0	0	0	0	0	8.94	0	NA	3	0	1	15	0	0		8.37955		10.2627				6.19451		8.01766			96.542	877;529;560	3.3549e-118	3.9
29	A1Z765;Q8MSH0			>tr|A1Z765|A1Z765_DROME CG12159, isoform A OS=Drosophila melanogaster GN=CG12159 PE=4 SV=1;>tr|Q8MSH0|Q8MSH0_DROME CG12159, isoform B OS=Drosophila melanogaster GN=CG12159 PE=2 SV=1	0		Both	0	0	0	0	NA	NA	0	0	0	NA	NA	NA	N/A	N/A	N/A	N/A	N/A	4.96	0	NA	0	0	1	0	0	2					7.61239	8.39907					6.7673	7.55397	21.652	202;197	3.3537e-08	0
30	A1Z768;Q7JY33		rnh1	>tr|A1Z768|A1Z768_DROME Ribonuclease H1, isoform B OS=Drosophila melanogaster GN=rnh1 PE=4 SV=1;>tr|Q7JY33|Q7JY33_DROME AT19436p OS=Drosophila melanogaster GN=rnh1 PE=2 SV=1	0	254nm (YW) unique	Both	0	3.54662	0	1	RNase_H	1	1	1	1	0	0	0	0	0	0	0	0	9.03	0	NA	0	0	2	6	0	2				8.86512	7.6807	7.94673				6.91304	6.37967	6.6457	35.191	314;333	1.3486e-88	0
31	A1Z784;A8DY67;Q7JV23		ACC	>tr|A1Z784|A1Z784_DROME CG11198, isoform A OS=Drosophila melanogaster GN=ACC PE=4 SV=1;>tr|A8DY67|A8DY67_DROME CG11198, isoform D OS=Drosophila melanogaster GN=ACC PE=4 SV=1;>tr|Q7JV23|Q7JV23_DROME CG11198, isoform B OS=Drosophila melanogaster GN=ACC PE=2	0	Both	Both	1.94442	10.779	0	0	NA	NA	0	0	0	0	0	0	0	0	0	0	0	5.86	0	NA	13	4	47	11	7	4	7.11237	8.96883	7.37703	9.25985	9.51053	7.82971	5.00518	6.11919	5.26982	6.47261	7.40333	5.7225	278.59	2482;2571;2323	0	6.9
32	A1Z7A8;A1Z7A9		coil	>tr|A1Z7A8|A1Z7A8_DROME Coilin, isoform D OS=Drosophila melanogaster GN=coil PE=2 SV=1;>tr|A1Z7A9|A1Z7A9_DROME Coilin, isoform C OS=Drosophila melanogaster GN=coil PE=4 SV=1	0		Both	0	0.0236388	0	0	NA	NA	0	0	0	NA	NA	NA	N/A	N/A	N/A	N/A	N/A	5.65	0	NA	0	0	9	1	0	10				7.26145	8.47537	8.63704				5.22303	6.97021	7.13188	70.557	634;488	5.5831e-47	0
33	A1Z7B8			>tr|A1Z7B8|A1Z7B8_DROME CG30373 OS=Drosophila melanogaster GN=CG30373 PE=4 SV=1	0		Both	0	0	0	0	NA	NA	0	0	0	NA	NA	NA	N/A	N/A	N/A	N/A	N/A	5.46	0	NA	0	0	3	0	0	4					8.23832	8.72241					7.28409	7.76816	17.877	158	1.4918e-18	0
34	A1Z7H3;Q8T3L1;A1Z7H2		Acsl	>tr|A1Z7H3|A1Z7H3_DROME Lethal (2) 44DEa, isoform C OS=Drosophila melanogaster GN=Acsl PE=4 SV=1;>tr|Q8T3L1|Q8T3L1_DROME Lethal (2) 44DEa, isoform A OS=Drosophila melanogaster GN=Acsl PE=2 SV=1;>tr|A1Z7H2|A1Z7H2_DROME Lethal (2) 44DEa, isoform D OS=Drosoph	0		Both	0	0.523292	0	0	NA	NA	0	0	0	NA	NA	NA	N/A	N/A	N/A	N/A	N/A	8.69	0	NA	0	0	22	1	0	5				7.90396	9.59514	7.88721				5.76719	8.03882	6.33092	79.427	707;715;717	1.5532e-99	0
35	A1Z7J7;A1Z7J6		sec31	>tr|A1Z7J7|A1Z7J7_DROME Sec31, isoform A OS=Drosophila melanogaster GN=sec31 PE=4 SV=1;>tr|A1Z7J6|A1Z7J6_DROME Sec31, isoform B OS=Drosophila melanogaster GN=sec31 PE=4 SV=1	0	254nm (YW) unique	Both	0	0.064082	0	0	NA	NA	0	0	1	0	0	0	1	0	0	0	0	5.76	0	NA	0	0	24	3	0	10				7.95024	9.51171	8.84213				5.74314	7.88846	7.21888	136.01	1240;1241	2.2728e-204	0
36	A1Z7K2		CG30349-RA	>tr|A1Z7K2|A1Z7K2_DROME CG30349 OS=Drosophila melanogaster GN=CG30349-RA PE=2 SV=1	0		Both	0	0	0	1	Utp12	1	1	1	0	NA	NA	NA	N/A	N/A	N/A	N/A	N/A	5.62	0	NA	0	0	7	0	0	6					8.45171	8.43797					7.05377	7.04005	68.306	620	2.5738e-63	0
37	A1Z7K6		CG8243-RA	>tr|A1Z7K6|A1Z7K6_DROME CG8243 OS=Drosophila melanogaster GN=CG8243-RA PE=2 SV=1	0		Both	0	0.0432816	0	0	NA	NA	0	0	0	NA	NA	NA	N/A	N/A	N/A	N/A	N/A	9	0	NA	0	0	4	1	0	4				7.21951	8.4828	8.33546				5.45886	7.25234	7.10503	55.031	517	4.2096e-20	0
38	A1Z7K8			>tr|A1Z7K8|A1Z7K8_DROME CG8235 OS=Drosophila melanogaster GN=CG8235 PE=4 SV=1	0	254nm (YW) unique	Both	0	0.0384321	1	1	tRNA_bind	1	1	1	1	0	0	0	1	0	0	1	0	9.1	0	NA	0	0	16	4	0	12				8.4753	9.58246	9.55068				6.53067	8.26024	8.22845	34.401	323	1.4691e-162	0
39	A1Z7K9			>tr|A1Z7K9|A1Z7K9_DROME CG8232 OS=Drosophila melanogaster GN=CG8232 PE=1 SV=1	0	254nm (YW) unique	Both	0.512239	1173.95	0	1	RNase_T	1	1	1	1	0	0	0	0	0	0	0	0	5.71	0	NA	1	1	14	19	0	1	6.34549	7.40364		9.7121	8.65422	6.21168	4.69227	5.13754		7.34565	7.001	4.55847	138.97	1241	1.2018e-136	1
40	A1Z7P1;A1Z7P0		Pmm45A	>tr|A1Z7P1|A1Z7P1_DROME Phosphomannomutase 45A, isoform A OS=Drosophila melanogaster GN=Pmm45A PE=4 SV=1;>tr|A1Z7P0|A1Z7P0_DROME Phosphomannomutase 45A, isoform B OS=Drosophila melanogaster GN=Pmm45A PE=3 SV=1	0	254nm (YW) unique	Both	0	0.801917	0	0	NA	NA	0	0	0	0	0	0	0	0	0	0	0	5.31	0	NA	0	0	14	2	0	4				7.93393	8.73542	7.72961				5.83275	7.2169	6.21109	69.916	623;584	1.804e-58	0
41	Q9XYM5;Q5BIG7;Q7KNF5;A1Z7P9;A1Z7P7;A1Z7Q1;Q8IGK3;A1Z7P8;A1Z7P5		Su(var)2-10	>tr|Q9XYM5|Q9XYM5_DROME LD27861p OS=Drosophila melanogaster GN=Su(var)2-10 PE=2 SV=1;>tr|Q5BIG7|Q5BIG7_DROME RE55465p OS=Drosophila melanogaster GN=Su(var)2-10 PE=2 SV=1;>tr|Q7KNF5|Q7KNF5_DROME Suppressor of variegation 2-10, isoform A OS=Drosophila melano	0	254nm (YW) unique	Both	0.294106	1.32673	0	1	SAP	1	1	0	0	0	0	0	0	0	0	0	0	7.87	0	yes	1	0	8	2	0	2		7.08485		8.47442	8.60277	8.01174		5.13663		6.49034	7.24105	6.65003	57.941	522;533;554;565;569;593;601;604;640	1.6468e-52	1.9
42	A1Z7Q8		alc	>tr|A1Z7Q8|A1Z7Q8_DROME Alicorn OS=Drosophila melanogaster GN=alc PE=2 SV=1	0		Both	0	0	0	0	NA	NA	0	0	0	NA	NA	NA	N/A	N/A	N/A	N/A	N/A	5.37	0	NA	0	0	4	0	0	1					8.19747	6.7227					6.96702	5.49226	36.417	341	2.4998e-08	0
43	A1Z7S0		Rme-8	>tr|A1Z7S0|A1Z7S0_DROME Receptor mediated endocytosis 8 OS=Drosophila melanogaster GN=Rme-8 PE=4 SV=1	0	254nm (YW) unique	Both	0	0.148514	0	0	NA	NA	0	0	0	0	0	0	0	0	0	0	0	6.61	0	NA	0	1	41	3	0	8	6.45336			8.63813	9.32133	9.11444	4.34616			5.89653	7.21413	7.00724	272.54	2408	3.4555e-241	0
44	A1Z7S1;A1Z7S2;Q8T0G8;A1Z7S3		ltd	>tr|A1Z7S1|A1Z7S1_DROME FI09421p OS=Drosophila melanogaster GN=ltd PE=2 SV=1;>tr|A1Z7S2|A1Z7S2_DROME Lightoid, isoform A OS=Drosophila melanogaster GN=ltd PE=3 SV=1;>tr|Q8T0G8|Q8T0G8_DROME LD04613p OS=Drosophila melanogaster GN=ltd PE=2 SV=1;>tr|A1Z7S3|A1Z	0		Both	0	0	0	0	NA	NA	0	0	1	NA	NA	NA	N/A	N/A	N/A	N/A	N/A	6.17	0	NA	0	0	3	0	0	3					8.43401	8.10819					7.28787	6.96208	24.909	222;385;388;686	9.2383e-22	0
45	Q95T49;A1Z7S4			>tr|Q95T49|Q95T49_DROME CG8026, isoform B OS=Drosophila melanogaster GN=CG8026 PE=2 SV=1;>tr|A1Z7S4|A1Z7S4_DROME CG8026, isoform A OS=Drosophila melanogaster GN=CG8026 PE=3 SV=1	0		365nm (X490) unique	0	NA	0	0	NA	NA	0	0	0	NA	NA	NA	N/A	N/A	N/A	N/A	N/A	9.6	0	NA	0	0	2	0	0	0					7.40856						6.20445		34.157	304;360	3.9892e-05	0
46	A1Z7T0;A1Z7T2;A1Z7T0-2;E1JH15;A1Z7T1;A1Z7T3;A8DY76;A1Z7T4	Serine/threonine-protein kinase N	Pkn	>sp|A1Z7T0|PKN_DROME Serine/threonine-protein kinase N OS=Drosophila melanogaster GN=Pkn PE=1 SV=1;>tr|A1Z7T2|A1Z7T2_DROME Protein kinase related to protein kinase N, isoform F OS=Drosophila melanogaster GN=Pkn PE=4 SV=1;>sp|A1Z7T0-2|PKN_DROME Isoform 2 of	0		Both	0	0	0	0	NA	NA	0	0	1	NA	NA	NA	N/A	N/A	N/A	N/A	N/A	6.51	0	NA	0	0	9	0	0	6					8.32127	8.02678					6.60525	6.31076	131.79	1190;1205;1260;1284;1407;1422;1501;590	2.1032e-51	0
47	Q7K3S2;A1Z7V8;A1Z7V9		CG1814-RB;CG1814-RA	>tr|Q7K3S2|Q7K3S2_DROME CG1814, isoform B OS=Drosophila melanogaster GN=CG1814-RB PE=2 SV=1;>tr|A1Z7V8|A1Z7V8_DROME CG1814, isoform C OS=Drosophila melanogaster GN=CG1814 PE=4 SV=1;>tr|A1Z7V9|A1Z7V9_DROME CG1814, isoform A OS=Drosophila melanogaster GN=CG1	0		365nm (X490) unique	0	NA	0	0	NA	NA	0	0	0	NA	NA	NA	N/A	N/A	N/A	N/A	N/A	8.72	0	NA	0	0	2	0	0	0					7.42951						6.10728		48.476	409;462;548	6.2337e-06	0
48	Q7K4R6;A1Z7W1			>tr|Q7K4R6|Q7K4R6_DROME CG1868, isoform A OS=Drosophila melanogaster GN=CG1868 PE=2 SV=1;>tr|A1Z7W1|A1Z7W1_DROME CG1868, isoform B OS=Drosophila melanogaster GN=CG1868 PE=4 SV=1	0		365nm (X490) unique	0	NA	0	0	NA	NA	0	0	0	NA	NA	NA	N/A	N/A	N/A	N/A	N/A	5.94	0	NA	0	0	2	0	0	0					7.83783						6.26963		83.039	718;751	9.6658e-06	0
49	A1Z7X7		GstT2	>tr|A1Z7X7|A1Z7X7_DROME CG30005 OS=Drosophila melanogaster GN=GstT2 PE=3 SV=2	0		Both	0	0	0	0	NA	NA	0	0	0	NA	NA	NA	N/A	N/A	N/A	N/A	N/A	8.99	0	NA	0	0	2	0	0	2					8.07015	8.14666					6.99096	7.06748	26.614	228	4.6532e-07	0
50	Q7K2P3;A1Z7Z4			>tr|Q7K2P3|Q7K2P3_DROME CG1648, isoform A OS=Drosophila melanogaster GN=CG1648 PE=2 SV=1;>tr|A1Z7Z4|A1Z7Z4_DROME CG1648, isoform B OS=Drosophila melanogaster GN=CG1648 PE=4 SV=1	0		254nm (YW) unique	NA	0	0	0	NA	NA	0	0	0	NA	NA	NA	N/A	N/A	N/A	N/A	N/A	8.89	0	NA	0	0	0	0	0	6						8.77579						7.54533	23.853	230;232	3.3209e-37	0
51	A1Z803		CG1665-RA	>tr|A1Z803|A1Z803_DROME CG1665 OS=Drosophila melanogaster GN=CG1665-RA PE=2 SV=1	0		Both	0	0	0	0	NA	NA	0	0	0	NA	NA	NA	N/A	N/A	N/A	N/A	N/A	8.76	0	NA	0	0	13	0	0	11					9.45536	9.0308					8.13316	7.70857	38.163	340	1.0221e-99	0
52	A1Z813		sec24	>tr|A1Z813|A1Z813_DROME Sec24 OS=Drosophila melanogaster GN=sec24 PE=4 SV=1	0	254nm (YW) unique	Both	0	28.9918	0	0	NA	NA	0	0	0	0	0	0	1	0	0	0	0	7.55	0	NA	0	1	15	6	0	1	6.30001			8.98734	8.91782	7.14752	4.65655			6.68387	7.27437	5.50406	129.38	1184	3.2552e-63	0
53	A1Z814;E1JH23	Oxysterol-binding protein	CG1513-RA	>tr|A1Z814|A1Z814_DROME Oxysterol-binding protein OS=Drosophila melanogaster GN=CG1513-RA PE=2 SV=2;>tr|E1JH23|E1JH23_DROME Oxysterol-binding protein OS=Drosophila melanogaster GN=CG1513 PE=3 SV=1	0		Both	0	0	0	0	NA	NA	0	0	0	NA	NA	NA	N/A	N/A	N/A	N/A	N/A	5.68	0	NA	0	0	3	0	0	1					7.96046	7.0235					6.42898	5.49203	87.441	784;406	1.0258e-08	0
54	A1Z830;A1Z831			>tr|A1Z830|A1Z830_DROME CG12128, isoform A OS=Drosophila melanogaster GN=CG12128 PE=4 SV=1;>tr|A1Z831|A1Z831_DROME CG12128, isoform B OS=Drosophila melanogaster GN=CG12128 PE=4 SV=1	0	Both	Both	18.0053	596.195	0	1	Methyltrn_RNA_3	1	1	1	0	1	1	1	0	0	1	0	0	6.82	0	NA	3	0	2	11	0	1		7.98884		9.57021	7.64506	6.37446		5.88036		7.42022	6.19789	4.9273	53.88	485;250	2.89e-70	9.5
55	A1Z843			>tr|A1Z843|A1Z843_DROME CG1371 OS=Drosophila melanogaster GN=CG1371 PE=4 SV=1	0	254nm (YW) unique	Both	0	0.37906	0	0	NA	NA	0	0	0	0	0	1	0	0	0	0	0	6.86	0	NA	0	0	44	2	0	15				8.24986	10.0543	8.34778				5.83783	8.24817	6.54159	130.89	1199	0	0
56	A1Z850	Superoxide dismutase [Cu-Zn]	Ccs	>tr|A1Z850|A1Z850_DROME Superoxide dismutase [Cu-Zn] OS=Drosophila melanogaster GN=Ccs PE=3 SV=1	0		Both	0	0	0	0	NA	NA	0	0	0	NA	NA	NA	N/A	N/A	N/A	N/A	N/A	5.56	0	NA	0	0	4	0	0	5					8.20828	8.51628					6.97782	7.28583	27.936	264	9.2322e-21	0
57	A1Z877;A1Z876		Ndg	>tr|A1Z877|A1Z877_DROME LP19846p OS=Drosophila melanogaster GN=Ndg PE=2 SV=1;>tr|A1Z876|A1Z876_DROME Nidogen/entactin, isoform B OS=Drosophila melanogaster GN=Ndg PE=4 SV=1	0		Both	0	0	0	0	NA	NA	0	0	0	NA	NA	NA	N/A	N/A	N/A	N/A	N/A	4.46	0	NA	0	0	2	0	0	19					7.26019	9.0639					5.48934	7.29305	149.08	1350;1370	3.9337e-62	0
58	A1Z892;Q7JX87		Prx2540-1;Prx2540-2	>tr|A1Z892|A1Z892_DROME LD11278p OS=Drosophila melanogaster GN=Prx2540-1 PE=2 SV=1;>tr|Q7JX87|Q7JX87_DROME Peroxiredoxin 2540 OS=Drosophila melanogaster GN=Prx2540-2 PE=2 SV=1	0		Both	0	0	0	0	NA	NA	0	0	0	NA	NA	NA	N/A	N/A	N/A	N/A	N/A	5.97	0	NA	0	0	12	0	0	13					9.54806	9.5549					8.43411	8.44096	24.784	220;220	3.7279e-119	0
59	A1Z893		CG12896-RA	>tr|A1Z893|A1Z893_DROME CG12896 OS=Drosophila melanogaster GN=CG12896-RA PE=2 SV=1	0		Both	0	0	0	0	NA	NA	0	0	0	NA	NA	NA	N/A	N/A	N/A	N/A	N/A	5.96	0	NA	0	0	1	0	0	1					7.52639	7.68262					6.41244	6.56868	24.756	220	5.8173e-114	0
60	A1Z897	Succinate dehydrogenase assembly factor 2-B, mitochondrial	CG12895	>sp|A1Z897|SDF2B_DROME Succinate dehydrogenase assembly factor 2-B, mitochondrial OS=Drosophila melanogaster GN=CG12895 PE=2 SV=1	0		254nm (YW) unique	NA	0	0	0	NA	NA	0	0	0	NA	NA	NA	N/A	N/A	N/A	N/A	N/A	5.05	0	NA	0	0	0	0	0	1						7.40737						6.56228	18.38	156	0.04237	0
61	A1Z898		Caf1-105	>tr|A1Z898|A1Z898_DROME Caf1-105 OS=Drosophila melanogaster GN=Caf1-105 PE=4 SV=1	0		Both	0	0	0	0	NA	NA	0	0	0	NA	NA	NA	N/A	N/A	N/A	N/A	N/A	8.43	0	NA	0	0	4	0	0	3					8.14151	7.80432					6.56175	6.22453	83.394	747	3.8387e-11	0
62	A1Z8A4;Q7K0T7;A1Z8A6;Q0E9C8;A1Z8A5		psq	>tr|A1Z8A4|A1Z8A4_DROME Pipsqueak, isoform A OS=Drosophila melanogaster GN=psq PE=4 SV=1;>tr|Q7K0T7|Q7K0T7_DROME LD33470p OS=Drosophila melanogaster GN=psq PE=2 SV=1;>tr|A1Z8A6|A1Z8A6_DROME Pipsqueak, isoform I OS=Drosophila melanogaster GN=psq PE=4 SV=1;>	0		254nm (YW) unique	NA	0	0	0	NA	NA	0	0	1	NA	NA	NA	N/A	N/A	N/A	N/A	N/A	6.25	0	yes	0	0	0	0	0	5						8.28756						6.92582	113.02	1046;1064;639;645;535	1.0105e-21	0
63	Q8T008;A1Z8A7;A8DY95			>tr|Q8T008|Q8T008_DROME CG11883, isoform B OS=Drosophila melanogaster GN=CG11883 PE=2 SV=1;>tr|A1Z8A7|A1Z8A7_DROME CG11883, isoform A OS=Drosophila melanogaster GN=CG11883 PE=3 SV=1;>tr|A8DY95|A8DY95_DROME CG11883, isoform C OS=Drosophila melanogaster GN=C	0		Both	0	0	0	0	NA	NA	0	0	0	NA	NA	NA	N/A	N/A	N/A	N/A	N/A	5.52	0	NA	0	0	4	0	1	3			8.04836		7.91495	7.53335			6.52983		6.39643	6.01481	78.519	713;732;792	1.5175e-15	0
64	A1Z8D0		nclb	>tr|A1Z8D0|A1Z8D0_DROME CG6751 OS=Drosophila melanogaster GN=nclb PE=4 SV=1	0		Both	0	0	0	0	NA	NA	0	0	0	NA	NA	NA	N/A	N/A	N/A	N/A	N/A	4.24	0	no	0	0	8	0	0	7					8.66038	8.75959					7.48429	7.5835	51.391	459	1.1274e-38	0
65	A1Z8D4;A1Z8D5;Q8MKK6		CG18004-RB;CG18004-RA	>tr|A1Z8D4|A1Z8D4_DROME AT13868p OS=Drosophila melanogaster GN=CG18004-RB PE=2 SV=1;>tr|A1Z8D5|A1Z8D5_DROME CG18004, isoform A OS=Drosophila melanogaster GN=CG18004-RA PE=2 SV=1;>tr|Q8MKK6|Q8MKK6_DROME CG18004, isoform C OS=Drosophila melanogaster GN=CG180	0		254nm (YW) unique	NA	0	0	0	NA	NA	0	0	0	NA	NA	NA	N/A	N/A	N/A	N/A	N/A	6.41	0	NA	0	0	0	0	0	2						7.69257						6.69257	31.598	291;297;198	5.1477e-06	0
66	A1Z8J0	CWF19-like protein 1 homolog	CG7741	>sp|A1Z8J0|C19L1_DROME CWF19-like protein 1 homolog OS=Drosophila melanogaster GN=CG7741 PE=2 SV=1	0	254nm (YW) unique	365nm (X490) unique	0	YW whole not available	0	1	CwfJ_C_1;CwfJ_C_2	1;1	1	1	0	0	0	0	1	0	0	0	0	6.19	0	NA	0	0	5	5	0	0				8.50205	8.14467					6.30946	6.57647		62.153	545	9.304e-103	0
67	A1Z8L8;Q95TS2			>tr|A1Z8L8|A1Z8L8_DROME CG7777, isoform A OS=Drosophila melanogaster GN=CG7777 PE=3 SV=1;>tr|Q95TS2|Q95TS2_DROME CG7777, isoform B OS=Drosophila melanogaster GN=CG7777 PE=2 SV=1	0		Both	0	0	0	0	NA	NA	0	0	0	NA	NA	NA	N/A	N/A	N/A	N/A	N/A	6.65	0	NA	0	0	1	0	0	3					7.04509	7.9323					6.34612	7.23333	28.443	264;268	3.2506e-10	0
68	A1Z8M2;A8DYA3		tou	>tr|A1Z8M2|A1Z8M2_DROME Toutatis, isoform A OS=Drosophila melanogaster GN=tou PE=4 SV=2;>tr|A8DYA3|A8DYA3_DROME Toutatis, isoform E OS=Drosophila melanogaster GN=tou PE=4 SV=1	0		Both	0	0	0	1	MBD	1	1	1	1	NA	NA	NA	N/A	N/A	N/A	N/A	N/A	5.72	0	maybe	0	0	1	0	0	2					7.08657	7.82929					5.13232	5.87505	322.21	2999;3131	8.9041e-05	0
69	A1Z8P9	Nucleoprotein TPR	Mtor	>sp|A1Z8P9|TPR_DROME Nucleoprotein TPR OS=Drosophila melanogaster GN=Mtor PE=1 SV=1	0	Both	Both	0.836808	0.0602663	0	0	NA	NA	0	1	1	1	0	0	1	0	0	0	1	5.03	0	NA	7	3	54	8	1	57	7.04739	8.81647	6.25037	8.6907	9.73699	9.55485	4.98292	6.02222	4.18591	5.988	7.67252	7.49039	262.35	2346	0	3.6
70	A1Z8Q2;A8DYB0			>tr|A1Z8Q2|A1Z8Q2_DROME CG13185, isoform B OS=Drosophila melanogaster GN=CG13185 PE=4 SV=1;>tr|A8DYB0|A8DYB0_DROME CG13185, isoform C OS=Drosophila melanogaster GN=CG13185 PE=4 SV=1	0		Both	0	0	0	0	NA	NA	0	0	1	NA	NA	NA	N/A	N/A	N/A	N/A	N/A	5.14	0	NA	0	0	3	0	0	1					8.32956	8.42243					5.88866	5.98152	605.19	5303;5547	4.4452e-07	0
71	A1Z8Q7;Q7JUM5;A5YTR9;E1JH39		MCPH1	>tr|A1Z8Q7|A1Z8Q7_DROME Microcephalin, isoform A OS=Drosophila melanogaster GN=MCPH1 PE=4 SV=1;>tr|Q7JUM5|Q7JUM5_DROME LD43341p OS=Drosophila melanogaster GN=MCPH1 PE=2 SV=1;>tr|A5YTR9|A5YTR9_DROME IP08064p OS=Drosophila melanogaster GN=MCPH1 PE=2 SV=1;>tr	0		Both	0	0	0	0	NA	NA	0	0	0	NA	NA	NA	N/A	N/A	N/A	N/A	N/A	9.61	0	NA	0	0	3	0	0	3					8.71873	7.40552					7.09548	5.78226	86.188	779;826;981;1028	4.7201e-09	0
72	A1Z8R2;Q961B8			>tr|A1Z8R2|A1Z8R2_DROME CG8290, isoform A OS=Drosophila melanogaster GN=CG8290 PE=4 SV=1	0		Both	0	0	0	0	NA	NA	0	0	0	NA	NA	NA	N/A	N/A	N/A	N/A	N/A	5.31	0	no	0	0	2	0	0	2					7.49489	7.75044					5.79592	6.05146	130.94	1199;1125	8.7424e-05	0
73	A1Z8R8		rho-7	>tr|A1Z8R8|A1Z8R8_DROME Rhomboid-7 OS=Drosophila melanogaster GN=rho-7 PE=4 SV=1	0		365nm (X490) unique	0	NA	0	0	NA	NA	0	0	0	NA	NA	NA	N/A	N/A	N/A	N/A	N/A	9.88	0	NA	0	0	3	0	0	0					8.09698						6.95087		38.932	351	8.1359e-10	0
74	A1Z8S6		pds5	>tr|A1Z8S6|A1Z8S6_DROME Pds5 OS=Drosophila melanogaster GN=pds5 PE=2 SV=1	0	365nm (X490) unique	Both	0.826715	0.163163	0	0	NA	NA	0	0	0	0	0	0	0	0	0	0	0	7.67	0	NA	2	1	16	1	0	1	6.54657	7.74601		7.30041	8.76035	7.83411	4.74723	5.30544		4.96494	6.96101	6.03479	138.89	1218	1.8432e-57	1.9
75	A1Z8U0		Prp8	>tr|A1Z8U0|A1Z8U0_DROME Pre-mRNA processing factor 8 OS=Drosophila melanogaster GN=Prp8 PE=4 SV=1	0	Both	Both	1.32	68.4614	0	1	PRO8NT;PROCN;PROCT;PRP8_domainIV;RRM_4;U5_2.snRNA_bdg;U6.snRNA_bdg	1;1;1;1;1;1;1	1	1	1	1	1	0	1	1	0	1	1	8.98	0	NA	11	6	68	46	57	3	7.15725	8.93383	9.05983	10.1104	9.64666	7.81495	5.06382	6.10089	6.96641	7.2745	7.55324	5.72153	279.57	2396	0	5.7
76	A1Z8U7		CG33964-RA	>tr|A1Z8U7|A1Z8U7_DROME CG13175 OS=Drosophila melanogaster GN=CG33964-RA PE=2 SV=1	0		Both	0	0	0	0	NA	NA	0	0	0	NA	NA	NA	N/A	N/A	N/A	N/A	N/A	5.13	0	NA	0	0	2	0	0	4					7.85454	8.63147					6.95145	7.72839	15.724	141	4.2533e-15	0
77	A1Z8V5			>tr|A1Z8V5|A1Z8V5_DROME CG13168, isoform C OS=Drosophila melanogaster GN=CG13168 PE=4 SV=1	0		254nm (YW) unique	NA	0	0	0	NA	NA	0	0	0	NA	NA	NA	N/A	N/A	N/A	N/A	N/A	9.84	0	NA	0	0	0	0	0	1						8.20626						6.95099	43.103	360	0.030835	0
78	A1Z8W9;A1Z8W8		garz	>tr|A1Z8W9|A1Z8W9_DROME Gartenzwerg, isoform A OS=Drosophila melanogaster GN=garz PE=4 SV=1;>tr|A1Z8W8|A1Z8W8_DROME Gartenzwerg, isoform B OS=Drosophila melanogaster GN=garz PE=4 SV=1	0		Both	0	2.64777	0	0	NA	NA	0	0	0	NA	NA	NA	N/A	N/A	N/A	N/A	N/A	5.58	0	NA	0	0	3	1	0	3				8.37072	7.63678	7.61557				5.84217	5.72296	5.70176	194.87	1740;1983	2.7499e-11	0
79	A1Z8X3		ana3	>tr|A1Z8X3|A1Z8X3_DROME Anastral spindle 3 OS=Drosophila melanogaster GN=ana3 PE=4 SV=1	0	254nm (YW) unique	Both	0	1.07129	0	0	NA	NA	0	0	0	0	0	0	0	0	0	0	0	8.16	0	NA	0	0	3	3	0	1				8.57408	7.23644	8.19698				5.94009	5.23211	6.19265	225.55	1977	3.2208e-50	0
80	A1Z909		CG8545-RA	>tr|A1Z909|A1Z909_DROME CG8545 OS=Drosophila melanogaster GN=CG8545-RA PE=2 SV=1	0		Both	0	0	1	1	Nol1_Nop2_Fmu	1	1	1	1	NA	NA	NA	N/A	N/A	N/A	N/A	N/A	5.38	0	NA	0	0	5	0	0	2					8.16224	7.69562					6.60594	6.13931	99.84	891	5.0996e-11	0
81	A1Z933		CG33672-RA	>tr|A1Z933|A1Z933_DROME CG33672 OS=Drosophila melanogaster GN=CG33672-RA PE=3 SV=1	0		Both	0	0	0	0	NA	NA	0	0	0	NA	NA	NA	N/A	N/A	N/A	N/A	N/A	6.11	0	NA	0	0	3	0	0	4					8.93091	9.28112					8.23195	8.58215	9.8019	86	1.3289e-27	0
82	A1Z934			>tr|A1Z934|A1Z934_DROME CG8778 OS=Drosophila melanogaster GN=CG8778 PE=2 SV=1	0	365nm (X490) unique	Both	0.269366	0.0063095	0	0	NA	NA	0	1	0	0	0	0	0	0	0	0	0	8.35	0	NA	2	0	10	1	0	10		8.11644		7.66817	9.58713	9.5875		6.24042		5.90091	8.38301	8.38338	31.909	299	9.3766e-97	7
83	A1Z936;A1Z935		CG8632-RA	>tr|A1Z936|A1Z936_DROME CG8632, isoform A OS=Drosophila melanogaster GN=ZnT49B PE=2 SV=1;>tr|A1Z935|A1Z935_DROME CG8632, isoform B OS=Drosophila melanogaster GN=ZnT49B PE=4 SV=1	0		Both	0	0	0	0	NA	NA	0	0	0	NA	NA	NA	N/A	N/A	N/A	N/A	N/A	8.75	0	NA	0	0	3	0	0	8					8.01263	8.66926					6.56546	7.22212	72.345	655;660	2.0117e-37	0
84	A1Z945			>tr|A1Z945|A1Z945_DROME CG8771 OS=Drosophila melanogaster GN=CG8771 PE=4 SV=1	0		365nm (X490) unique	0.218058	YW whole not available	0	0	NA	NA	0	0	0	NA	NA	NA	N/A	N/A	N/A	N/A	N/A	5.94	0	NA	1	1	15	1	0	0	6.57793	7.20622		7.2401	8.84405		4.62853	4.66031		4.759	6.89466		208.41	1822	4.2198e-77	0.7
85	B3DN53;A1Z987		Cap-G	>tr|B3DN53|B3DN53_DROME Cap-G, isoform G OS=Drosophila melanogaster GN=Cap-G PE=2 SV=1;>tr|A1Z987|A1Z987_DROME Cap-G, isoform F OS=Drosophila melanogaster GN=Cap-G PE=4 SV=2	0		Both	0.752999	0	0	0	NA	NA	0	0	0	NA	NA	NA	N/A	N/A	N/A	N/A	N/A	6.83	0	NA	1	0	7	0	0	1		7.18376			8.28522	7.17516		4.82566			6.52179	5.41174	148.4	1299;1351	1.1084e-23	1.2
86	A1Z992		AGBE	>tr|A1Z992|A1Z992_DROME CG33138 OS=Drosophila melanogaster GN=AGBE PE=4 SV=1	0	Both	Both	0.266401	0.0522929	0	0	NA	NA	0	0	0	0	0	0	0	0	0	0	0	5.8	0	NA	2	2	31	2	0	16	7.22704	8.39104		7.74639	9.84382	8.74155	5.61425	6.08365		5.56473	8.23104	7.12875	79.108	685	0	2.6
87	A1Z9A2	UPF0587 protein CG4646	CG4646	>sp|A1Z9A2|U587_DROME UPF0587 protein CG4646 OS=Drosophila melanogaster GN=CG4646 PE=2 SV=1	0		Both	0	0	0	0	NA	NA	0	0	0	NA	NA	NA	N/A	N/A	N/A	N/A	N/A	4.85	0	NA	0	0	8	0	0	8					8.92113	9.39062					7.87974	8.34922	18.605	163	1.8693e-52	0
88	A1Z9A8	Protein PTCD3 homolog, mitochondrial	CG4679	>sp|A1Z9A8|PTCD3_DROME Protein PTCD3 homolog, mitochondrial OS=Drosophila melanogaster GN=CG4679 PE=2 SV=1	0	Both	Both	8.13288	93.4344	1	0	NA	NA	1	1	1	1	1	1	0	0	1	0	0	5.53	0	NA	13	2	19	33	1	10	7.32286	9.47919	6.50312	11.2204	9.35717	8.70839	5.77878	7.15042	4.95906	8.85236	7.8131	7.16432	74.206	652	0	24.1
89	A1Z9B5		CG10799-RA	>tr|A1Z9B5|A1Z9B5_DROME CG10799 OS=Drosophila melanogaster GN=CG10799-RA PE=2 SV=1	0		254nm (YW) unique	NA	0	0	0	NA	NA	0	0	0	NA	NA	NA	N/A	N/A	N/A	N/A	N/A	4.67	0	NA	0	0	0	0	0	2						7.20428						6.42612	18.736	166	0.00057773	0
90	A1Z9E0;A1Z9D9		bbc	>tr|A1Z9E0|A1Z9E0_DROME Bb in a boxcar, isoform B OS=Drosophila melanogaster GN=bbc PE=3 SV=1;>tr|A1Z9D9|A1Z9D9_DROME Bb in a boxcar, isoform A OS=Drosophila melanogaster GN=bbc PE=3 SV=1	0		365nm (X490) unique	0	NA	0	0	NA	NA	0	0	0	NA	NA	NA	N/A	N/A	N/A	N/A	N/A	8.56	0	NA	0	0	2	0	0	0					7.72923						6.72923		46.007	417;417	2.6963e-06	0
91	A1Z9E3	Elongation factor Tu	EfTuM	>tr|A1Z9E3|A1Z9E3_DROME Elongation factor Tu OS=Drosophila melanogaster GN=EfTuM PE=3 SV=1	0	Both	Both	0.710732	0.516853	1	1	GTP_EFTU;GTP_EFTU_D2;GTP_EFTU_D3	1;1;1	1	1	1	1	0	0	1	0	1	0	0	8.24	0	NA	6	3	25	12	0	20	7.8366	9.24866		9.48518	10.2043	9.35771	6.38943	7.03591		7.34143	8.75713	7.91054	53.992	489	0	18
92	A8DYC9;Q86NK6;Q7JRK7;A1Z9F4;Q8IGA7;Q8SZX5;E1JH60;E1JH61;A1Z9F0;Q6IDH2		CG6152	>tr|A8DYC9|A8DYC9_DROME CG33156, isoform F OS=Drosophila melanogaster GN=CG33156 PE=3 SV=1;>tr|Q86NK6|Q86NK6_DROME CG33156, isoform B OS=Drosophila melanogaster GN=CG6152 PE=2 SV=1;>tr|Q7JRK7|Q7JRK7_DROME CG33156, isoform A OS=Drosophila melanogaster GN=CG	0		365nm (X490) unique	0	NA	0	0	NA	NA	0	0	0	NA	NA	NA	N/A	N/A	N/A	N/A	N/A	5.5	0	NA	0	0	4	0	0	0					8.03395						6.85786		49.92	450;453;454;490;375;420;483;484;520;548	8.0633e-19	0
93	A1Z9G2		CG6197-RA	>tr|A1Z9G2|A1Z9G2_DROME CG6197 OS=Drosophila melanogaster GN=CG6197-RA PE=2 SV=1	0	365nm (X490) unique	Both	1.73681	1.20824	0	0	NA	NA	0	1	1	0	0	0	0	0	0	0	0	5.45	0	NA	2	0	11	1	0	3		7.79273		8.04213	8.48083	7.65184		5.46641		5.77028	6.79958	5.9706	103.33	883	7.5342e-54	3.1
94	A1Z9I0			>tr|A1Z9I0|A1Z9I0_DROME CG6357 OS=Drosophila melanogaster GN=CG6357 PE=4 SV=1	0		Both	0	0	0	0	NA	NA	0	0	0	NA	NA	NA	N/A	N/A	N/A	N/A	N/A	5.73	0	NA	0	0	1	0	0	11					7.15694	8.75211					5.72557	7.32075	51.634	439	5.6206e-28	0
95	A1Z9I5		tum	>tr|A1Z9I5|A1Z9I5_DROME Tumbleweed OS=Drosophila melanogaster GN=tum PE=4 SV=1	0		Both	0	0	0	0	NA	NA	0	0	0	NA	NA	NA	N/A	N/A	N/A	N/A	N/A	9.2	0	NA	0	0	8	0	0	4					8.32048	8.10247					6.80197	6.58396	69.762	625	5.5911e-96	0
96	A1Z9I6			>tr|A1Z9I6|A1Z9I6_DROME CG13344 OS=Drosophila melanogaster GN=CG13344 PE=4 SV=1	0	254nm (YW) unique	Both	0	4.02479	0	0	NA	NA	0	0	0	0	0	0	0	0	0	0	0	5.9	0	NA	0	0	3	5	0	3				8.83076	7.44495	7.85998				6.9518	6.2145	6.62953	42.171	374	1.146e-70	0
97	A1Z9J3;E1JH64;A1Z9J2;A1Z9J0;B7YZG4;B7YZG2;B7YZG3;A1Z9I8;E1JH62;A1Z9I9;E1JH65;B7YZG6;B7YZG5;E1JH63;A1Z9J1		shot	>tr|A1Z9J3|A1Z9J3_DROME Short stop, isoform H OS=Drosophila melanogaster GN=shot PE=4 SV=1;>tr|E1JH64|E1JH64_DROME Short stop, isoform Q OS=Drosophila melanogaster GN=shot PE=4 SV=1;>tr|A1Z9J2|A1Z9J2_DROME Short stop, isoform C OS=Drosophila melanogaster G	0		Both	0	0.756143	0	0	NA	NA	0	0	0	NA	NA	NA	N/A	N/A	N/A	N/A	N/A	5.5	0	NA	0	0	1	1	0	1				7.62792	7.66551	7.47159				4.37488	4.97266	4.77874	989.54	8805;5155;5160;5201;5368;5370;5375;5385;5388;5390;5458;5479;5486;5499;5501	4.5934e-06	0
98	A1Z9J6		mRpL53	>tr|A1Z9J6|A1Z9J6_DROME Mitochondrial ribosomal protein L53 OS=Drosophila melanogaster GN=mRpL53 PE=2 SV=1	0	254nm (YW) unique	Both	1.64116	63.6639	0	1	MRP_L53	1	1	0	1	0	0	0	0	0	0	0	0	10.02	1	NA	1	0	6	9	0	3		7.89202		10.3289	8.5965	8.04895		6.23872		8.57037	7.5965	7.04895	16.86	155	1.5145e-157	9
99	A1Z9K0			>tr|A1Z9K0|A1Z9K0_DROME CG6701 OS=Drosophila melanogaster GN=CG6701 PE=4 SV=1	0	Both	Both	16.6476	226.243	0	0	NA	NA	0	0	0	1	1	1	1	0	1	1	1	9.13	0	yes	9	3	14	56	32	4	7.13786	9.25079	8.79478	10.8685	8.83658	7.9982	5.26281	6.60995	6.91972	8.19524	6.96152	6.12313	142.03	1251	0	6.8
100	Q7KQC4;Q95RE0;A1Z9K4		RN-tre	>tr|Q7KQC4|Q7KQC4_DROME Tre oncogene-related protein OS=Drosophila melanogaster GN=RN-tre PE=2 SV=1;>tr|Q95RE0|Q95RE0_DROME LD38355p OS=Drosophila melanogaster GN=RN-tre PE=2 SV=1;>tr|A1Z9K4|A1Z9K4_DROME Tre oncogene-related protein, isoform A OS=Drosophil	0		Both	0	0	0	0	NA	NA	0	0	0	NA	NA	NA	N/A	N/A	N/A	N/A	N/A	7.24	0	NA	0	0	1	0	0	2					6.81729	7.21408					5.43708	5.83387	53.73	457;485;571	4.2142e-06	0
101	A1Z9L3		pea	>tr|A1Z9L3|A1Z9L3_DROME FI05376p OS=Drosophila melanogaster GN=pea PE=2 SV=1	0	254nm (YW) unique	Both	0.988619	8.27315	1	1	HA2;S1	1;1	1	1	1	1	1	0	1	1	1	1	0	8.9	0	NA	1	0	10	16	0	3		7.46078		9.67368	8.42109	8.32807		5.03028		7.15036	6.60817	6.51516	141.93	1242	3.2102e-108	1.5
102	A1Z9M2;Q9VBM3			>tr|A1Z9M2|A1Z9M2_DROME CG8331 OS=Drosophila melanogaster GN=CG8331 PE=4 SV=1	0		Both	0	0.0519762	0	0	NA	NA	0	0	0	NA	NA	NA	N/A	N/A	N/A	N/A	N/A	7.65	0	NA	0	0	4	1	1	5			6.96933	8.14877	9.09653	9.11701			6.27035	6.85137	8.39758	8.41804	20.313	178;174	4.3722e-13	0
103	A1Z9M4;Q7KHK4;A8DYD3;A1Z9M3;B7YZE6;A8DYD1;A8DYD2		cg	>tr|A1Z9M4|A1Z9M4_DROME Combgap, isoform C OS=Drosophila melanogaster GN=cg PE=4 SV=1;>tr|Q7KHK4|Q7KHK4_DROME Comb gap OS=Drosophila melanogaster GN=cg PE=2 SV=1;>tr|A8DYD3|A8DYD3_DROME Combgap, isoform F OS=Drosophila melanogaster GN=cg PE=4 SV=1;>tr|A1Z9	0		Both	0	0	0	1	zf-C2H2	manual	1	1	0	NA	NA	NA	N/A	N/A	N/A	N/A	N/A	9.05	0	yes	0	0	2	0	0	2					7.72354	7.69462					6.21838	6.18946	69.313	629;671;770;772;773;796;825	1.2586e-05	0
104	Q95U20;A1Z9N0		opa1-like	>tr|Q95U20|Q95U20_DROME GH13793p OS=Drosophila melanogaster GN=opa1-like PE=2 SV=1;>tr|A1Z9N0|A1Z9N0_DROME Optic atrophy 1-like, isoform A OS=Drosophila melanogaster GN=opa1-like PE=3 SV=1	0		Both	0	0	0	0	NA	NA	0	0	1	NA	NA	NA	N/A	N/A	N/A	N/A	N/A	9.02	0	NA	0	1	23	0	0	22	6.11919				9.3619	9.17883	4.36333				7.60602	7.42297	107.2	933;972	0	0
105	A1Z9P1		tej	>tr|A1Z9P1|A1Z9P1_DROME CG8589 OS=Drosophila melanogaster GN=tej PE=2 SV=1	0	254nm (YW) unique		NA	YW whole not available	0	1	TUDOR	1	1	0	1	0	0	0	0	0	0	0	0	6.07	0	NA	0	0	0	2	0	0				7.49388						5.48114			63.851	559	0.00065814	0
106	A1Z9S1	Biogenesis of lysosome-related organelles complex 1 subunit 1	blos1	>sp|A1Z9S1|BL1S1_DROME Biogenesis of lysosome-related organelles complex 1 subunit 1 OS=Drosophila melanogaster GN=blos1 PE=1 SV=2	0		Both	0	0	0	0	NA	NA	0	0	0	NA	NA	NA	N/A	N/A	N/A	N/A	N/A	6.2	0	yes	0	0	1	0	0	3					7.10897	7.79817					6.26385	6.95308	16.153	147	6.7862e-07	0
107	A1Z9S6;A1Z9S5		Su(var)2-HP2	>tr|A1Z9S6|A1Z9S6_DROME Su(Var)2-HP2, isoform A OS=Drosophila melanogaster GN=Su(var)2-HP2 PE=4 SV=1;>tr|A1Z9S5|A1Z9S5_DROME RE12383p OS=Drosophila melanogaster GN=Su(var)2-HP2 PE=2 SV=1	0		Both	0	1.63301	0	0	NA	NA	0	0	0	NA	NA	NA	N/A	N/A	N/A	N/A	N/A	5.87	0	NA	0	0	6	1	0	8				8.9196	7.80376	8.33401				6.06863	5.60786	6.13811	355.97	3257;1633	1.9096e-30	0
108	A1Z9W2		CG33506-RA	>tr|A1Z9W2|A1Z9W2_DROME CG33506 OS=Drosophila melanogaster GN=CG33506-RA PE=2 SV=1	0		Both	0	0	0	0	NA	NA	0	0	0	NA	NA	NA	N/A	N/A	N/A	N/A	N/A	9.39	0	NA	0	0	4	0	0	2					8.57397	7.98743					7.34353	6.75699	36.401	320	2.0634e-21	0
109	A1Z9W4;E1JH68		Inr-a	>tr|A1Z9W4|A1Z9W4_DROME LD11480p OS=Drosophila melanogaster GN=Inr-a PE=2 SV=2;>tr|E1JH68|E1JH68_DROME FI20283p1 OS=Drosophila melanogaster GN=Inr-a PE=2 SV=1	0		Both	0	0	1	0	NA	NA	1	1	1	NA	NA	NA	N/A	N/A	N/A	N/A	N/A	5.86	0	maybe	0	0	2	0	0	3					7.19061	7.96105					5.29299	6.06341	212.76	1953;573	2.7531e-15	0
110	A1Z9X0;Q0E974;Q0E971;Q0E973;Q0E972		aPKC	>tr|A1Z9X0|A1Z9X0_DROME Atypical protein kinase C, isoform A OS=Drosophila melanogaster GN=aPKC PE=1 SV=1;>tr|Q0E974|Q0E974_DROME Atypical protein kinase C, isoform D OS=Drosophila melanogaster GN=aPKC PE=1 SV=1;>tr|Q0E971|Q0E971_DROME Atypical protein kin	0	Both	Both	0.915119	11.8101	0	0	NA	NA	0	0	0	0	0	0	1	0	0	1	0	5.68	0	NA	2	0	9	3	0	4		7.76792		8.87112	8.73635	7.42985		5.74469		6.83943	7.35614	6.04964	69.556	606;608;503;524;526	9.9444e-91	5
111	A1ZA03		Pms2	>tr|A1ZA03|A1ZA03_DROME Pms2 OS=Drosophila melanogaster GN=Pms2 PE=4 SV=1	0		365nm (X490) unique	0	YW whole not available	0	0	NA	NA	0	0	0	NA	NA	NA	N/A	N/A	N/A	N/A	N/A	5.36	0	no	0	0	1	1	0	0				6.64803	7.46593					4.51636	5.82248		101.28	899	5.9001e-07	0
112	A1ZA22		eIF2B-gamma	>tr|A1ZA22|A1ZA22_DROME eIF2B-gamma OS=Drosophila melanogaster GN=eIF2B-gamma PE=4 SV=1	0		Both	0	0	1	0	NA	NA	1	1	1	NA	NA	NA	N/A	N/A	N/A	N/A	N/A	7.25	0	NA	0	0	15	0	0	2					9.12254	7.57404					7.78012	6.23162	50.671	455	2.4354e-89	0
113	A1ZA72;A1ZA73;A1ZA66;A1ZA67		Strn-Mlck	>tr|A1ZA72|A1ZA72_DROME Stretchin-Mlck, isoform D OS=Drosophila melanogaster GN=Strn-Mlck PE=4 SV=1;>tr|A1ZA73|A1ZA73_DROME Stretchin-Mlck, isoform E OS=Drosophila melanogaster GN=Strn-Mlck PE=4 SV=1;>tr|A1ZA66|A1ZA66_DROME Stretchin-Mlck, isoform A OS=Dro	0		365nm (X490) unique	0	NA	0	0	NA	NA	0	0	0	NA	NA	NA	N/A	N/A	N/A	N/A	N/A	5.01	0	NA	0	1	2	0	1	0	7.36337		7.83599		8.07408		4.80707		5.27969		5.5178		808.98	7210;2403;9270;4463	9.1029e-05	0
114	A1ZA83			>tr|A1ZA83|A1ZA83_DROME CG8397 OS=Drosophila melanogaster GN=CG8397 PE=4 SV=1	0		Both	0	0	0	0	NA	NA	0	0	0	NA	NA	NA	N/A	N/A	N/A	N/A	N/A	8.73	0	NA	0	0	6	0	0	9					8.71144	9.27752					7.80835	8.37444	27.794	245	1.7268e-83	0
115	A1ZA89;Q8STB9;Q8WR08		Dg	>tr|A1ZA89|A1ZA89_DROME Dystroglycan, isoform B OS=Drosophila melanogaster GN=Dg PE=4 SV=1;>tr|Q8STB9|Q8STB9_DROME Dystroglycan type II OS=Drosophila melanogaster GN=Dg PE=2 SV=1;>tr|Q8WR08|Q8WR08_DROME Dystroglycan type I OS=Drosophila melanogaster GN=Dg	0		Both	0	0	0	0	NA	NA	0	0	0	NA	NA	NA	N/A	N/A	N/A	N/A	N/A	5.93	0	NA	0	0	2	0	0	7					7.63195	8.17391					6.05216	6.59413	102.63	914;997;1179	2.0631e-26	0
116	Q7K221;A1ZAA5		Got1	>tr|Q7K221|Q7K221_DROME Glutamate oxaloacetate transaminase 1, isoform A OS=Drosophila melanogaster GN=Got1 PE=2 SV=1;>tr|A1ZAA5|A1ZAA5_DROME Glutamate oxaloacetate transaminase 1, isoform B OS=Drosophila melanogaster GN=Got1 PE=4 SV=1	0		Both	0	0	0	0	NA	NA	0	0	0	NA	NA	NA	N/A	N/A	N/A	N/A	N/A	7.16	0	NA	0	0	18	0	0	15					9.82961	9.49174					8.50738	8.16953	46.087	416;437	0	0
117	A1ZAA9			>tr|A1ZAA9|A1ZAA9_DROME CG10731 OS=Drosophila melanogaster GN=CG10731 PE=4 SV=1	0		365nm (X490) unique	0	NA	0	0	NA	NA	0	0	0	NA	NA	NA	N/A	N/A	N/A	N/A	N/A	9.03	0	NA	0	0	3	0	0	0					8.09614						6.98222		22.677	203	9.3346e-08	0
118	A1ZAB5	Protein clueless	clu	>sp|A1ZAB5|CLU_DROME Protein clueless OS=Drosophila melanogaster GN=clu PE=1 SV=1	0	Both	Both	1.0938	25.7317	0	1	eIF3_p135	1	1	0	0	0	0	0	1	1	0	1	1	6.14	0	NA	6	4	35	26	14	12	7.28128	9.01401	8.09054	10.2127	9.8018	8.33472	5.41797	6.40449	6.22722	7.59939	7.93848	6.47139	160.85	1448	0	4.1
119	A1ZAC7		fidipidine	>tr|A1ZAC7|A1ZAC7_DROME Fidipidine OS=Drosophila melanogaster GN=fidipidine PE=2 SV=1	0		Both	0	0	0	0	NA	NA	0	0	0	NA	NA	NA	N/A	N/A	N/A	N/A	N/A	5.61	0	NA	0	0	1	0	0	1					7.0498	7.15369					5.60264	5.70654	69.331	595	0.00064137	0
120	A1ZAD7		CG42372-RA	>tr|A1ZAD7|A1ZAD7_DROME AT22563p2 OS=Drosophila melanogaster GN=CG42372-RA PE=2 SV=1	0	254nm (YW) unique	365nm (X490) unique	0	YW whole not available	1	1	RF.1	1	1	1	1	0	0	0	0	0	0	0	0	10.01	0	NA	0	0	1	2	0	0				8.08781	7.41789					6.64875	6.57279		16.781	146	0.00036362	0
121	A1ZAG1			>tr|A1ZAG1|A1ZAG1_DROME CG4398 OS=Drosophila melanogaster GN=CG4398 PE=4 SV=1	0		254nm (YW) unique	NA	0	0	0	NA	NA	0	0	0	NA	NA	NA	N/A	N/A	N/A	N/A	N/A	9.13	0	NA	0	0	0	0	0	3						7.80261						6.80261	27.167	233	4.549e-05	0
122	A1ZAK1		IntS8	>tr|A1ZAK1|A1ZAK1_DROME CG5859 OS=Drosophila melanogaster GN=IntS8 PE=2 SV=1	0		365nm (X490) unique	0	NA	0	0	NA	NA	0	1	1	NA	NA	NA	N/A	N/A	N/A	N/A	N/A	6.07	0	NA	0	0	3	0	0	0					7.85572						6.22225		113.48	1007	9.9833e-37	0
123	A1ZAK4;A1ZAK3;Q8T0D3;Q8IFW6		Dek	>tr|A1ZAK4|A1ZAK4_DROME Dek, isoform A OS=Drosophila melanogaster GN=Dek PE=2 SV=1;>tr|A1ZAK3|A1ZAK3_DROME Dek, isoform C OS=Drosophila melanogaster GN=Dek PE=4 SV=1;>tr|Q8T0D3|Q8T0D3_DROME Dek, isoform B OS=Drosophila melanogaster GN=Dek PE=2 SV=1;>tr|Q8I	0		Both	0	0	0	0	NA	NA	0	1	0	NA	NA	NA	N/A	N/A	N/A	N/A	N/A	4.73	0	NA	0	0	11	0	1	14			6.76544		9.18574	9.60467			5.31827		7.7386	8.15752	71.893	663;667;669;612	0	0
124	A1ZAK7;A1ZAK8		Psi	>tr|A1ZAK7|A1ZAK7_DROME LD35640p OS=Drosophila melanogaster GN=Psi PE=2 SV=1;>tr|A1ZAK8|A1ZAK8_DROME P-element somatic inhibitor, isoform C OS=Drosophila melanogaster GN=Psi PE=4 SV=1	0	Both	Both	84.3277	447.798	1	1	KH_1;DUF1897	4;2	1	1	1	1	1	1	0	0	1	0	0	8.28	0	NA	15	5	15	32	8	12	7.62786	10.303	8.49668	12.2464	9.09705	8.97841	6.1807	8.00294	7.04953	9.89986	7.6499	7.53125	81.587	796;797	0	20.6
125	A1ZAK9		Psi	>tr|A1ZAK9|A1ZAK9_DROME P-element somatic inhibitor, isoform A OS=Drosophila melanogaster GN=Psi PE=1 SV=1	0	254nm (YW) unique		NA	YW whole not available	1	1	KH_1;DUF1897	4;2	1	1	1	1	1	1	0	0	1	0	0	8.03	0	NA	0	0	0	2	0	0				8.8788						6.82881			73.447	716	0	22.9
126	A1ZAN6;A1ZAN7		RhoGEF2	>tr|A1ZAN6|A1ZAN6_DROME RhoGEF2, isoform D OS=Drosophila melanogaster GN=RhoGEF2 PE=4 SV=1;>tr|A1ZAN7|A1ZAN7_DROME RhoGEF2, isoform E OS=Drosophila melanogaster GN=RhoGEF2 PE=4 SV=1	0		Both	1.62951	0.09491	0	0	NA	NA	0	0	0	NA	NA	NA	N/A	N/A	N/A	N/A	N/A	6.3	0	NA	1	1	6	1	1	5	6.21291	7.52008	6.54159	7.85294	8.25842	8.58139	4.23063	4.91529	4.55932	5.29396	6.27616	6.59912	280.8	2559;2205	8.9594e-23	0.5
127	A1ZAP7			>tr|A1ZAP7|A1ZAP7_DROME CG6967, isoform C OS=Drosophila melanogaster GN=CG6967 PE=4 SV=2	0	Both		X490 whole not available	YW whole not available	0	0	NA	NA	0	0	0	1	1	1	1	0	1	1	1	8.95	0	NA	12	0	0	35	8	0		9.34598	7.68158	10.8706				6.94908	6.05831	8.44902			85.993	764	0	17.9
128	A1ZAS3;Q8MQK4	Uridine kinase	l(2)k01209	>tr|A1ZAS3|A1ZAS3_DROME Uridine kinase OS=Drosophila melanogaster GN=l(2)k01209 PE=2 SV=1;>tr|Q8MQK4|Q8MQK4_DROME Uridine kinase OS=Drosophila melanogaster GN=l(2)k01209 PE=2 SV=1	0		365nm (X490) unique	0	NA	0	0	NA	NA	0	0	1	NA	NA	NA	N/A	N/A	N/A	N/A	N/A	8.15	0	NA	0	0	4	0	0	0					7.91873						6.47157		63.012	561;626	3.3654e-12	0
129	A1ZAS8;Q9NDR1		EDTP	>tr|A1ZAS8|A1ZAS8_DROME Egg-derived tyrosine phosphatase, isoform B OS=Drosophila melanogaster GN=EDTP PE=4 SV=1;>tr|Q9NDR1|Q9NDR1_DROME BcDNA.LD23181 OS=Drosophila melanogaster GN=EDTP PE=2 SV=2	0		365nm (X490) unique	0	NA	0	0	NA	NA	0	0	0	NA	NA	NA	N/A	N/A	N/A	N/A	N/A	6.03	0	NA	0	0	4	0	0	0					7.92306						6.52512		82.944	746;747	4.2721e-33	0
130	A1ZAT5		Tes	>tr|A1ZAT5|A1ZAT5_DROME CG6522 OS=Drosophila melanogaster GN=Tes PE=4 SV=1	0		Both	0	0	0	0	NA	NA	0	0	0	NA	NA	NA	N/A	N/A	N/A	N/A	N/A	6.5	0	NA	0	0	6	0	0	2					8.38059	7.28457					6.80081	5.70478	89.848	816	1.3006e-25	0
131	A1ZAU2		CG18431-RA	>tr|A1ZAU2|A1ZAU2_DROME CG18431 OS=Drosophila melanogaster GN=CG18431-RA PE=2 SV=1	0		Both	0	0	0	0	NA	NA	0	0	0	NA	NA	NA	N/A	N/A	N/A	N/A	N/A	5.66	0	NA	0	0	2	0	0	4					7.77654	8.60869					6.77654	7.60869	21.663	194	1.2794e-26	0
132	A1ZAU8-2;A1ZAU8-3;B7YZJ2;E1JH90;A1ZAU8;B7YZJ1;E1JH91;E1JH92	Short spindle protein 4	Patronin;ssp4	>sp|A1ZAU8-2|SSP4_DROME Isoform A of Short spindle protein 4 OS=Drosophila melanogaster GN=ssp4;>sp|A1ZAU8-3|SSP4_DROME Isoform B of Short spindle protein 4 OS=Drosophila melanogaster GN=ssp4;>tr|B7YZJ2|B7YZJ2_DROME Short spindle 4, isoform E OS=Drosophila	0		Both	0	0	0	0	NA	NA	0	0	0	NA	NA	NA	N/A	N/A	N/A	N/A	N/A	8.78	0	NA	0	0	3	0	0	4					8.78192	9.2017					6.97574	7.39552	170.94	1517;1540;1599;1671;1630;1663;1156;183	2.2757e-12	0
133	A1ZAV3		MESR4	>tr|A1ZAV3|A1ZAV3_DROME Misexpression suppressor of ras 4, isoform A OS=Drosophila melanogaster GN=MESR4 PE=4 SV=1	0		254nm (YW) unique	NA	0	0	0	NA	NA	0	0	0	NA	NA	NA	N/A	N/A	N/A	N/A	N/A	4.98	0	yes	0	0	0	0	0	1						7.49592						5.57684	241.16	2171	0.00024825	0
134	A1ZAW0		Dcr-2	>tr|A1ZAW0|A1ZAW0_DROME Dicer-2 OS=Drosophila melanogaster GN=Dcr-2 PE=1 SV=1	0	Both	365nm (X490) unique	1.59168	YW whole not available	1	1	Ribonuclease_3;dsrm;PAZ;ResIII	2;1;1;1	1	0	1	0	0	0	0	0	0	0	0	6.41	0	no	3	1	17	8	3	0	6.34141	8.14459	6.79594	8.73114	8.84145		4.3328	5.46178	4.78734	6.08135	6.83285		197.76	1722	1.631e-64	2.1
135	A1ZAW5		icln	>sp|A1ZAW5|ICLN_DROME Methylosome subunit pICln OS=Drosophila melanogaster GN=icln PE=1 SV=1	0		Both	0	0	0	0	NA	NA	0	0	0	NA	NA	NA	N/A	N/A	N/A	N/A	N/A	3.96	0	NA	0	0	3	0	0	2					8.6622	8.47661					7.88405	7.69846	23.742	215	2.0767e-53	0
136	A1ZAW6			>tr|A1ZAW6|A1ZAW6_DROME CG30105 OS=Drosophila melanogaster GN=CG30105 PE=4 SV=1	0		Both	0	0	0	1	RNase_H2_suC	1	1	1	0	NA	NA	NA	N/A	N/A	N/A	N/A	N/A	4.99	0	NA	0	0	5	0	0	6					8.60939	9.22435					7.568	8.18296	17.425	155	1.1851e-66	0
137	A1ZAW9		Oxp	>tr|A1ZAW9|A1ZAW9_DROME CG18186 OS=Drosophila melanogaster GN=Oxp PE=4 SV=1	0		Both	0	0	0	0	NA	NA	0	0	0	NA	NA	NA	N/A	N/A	N/A	N/A	N/A	7.71	0	NA	0	0	1	0	0	1					7.3816	7.79133					6.77954	7.18927	9.9342	84	0.00088906	0
138	A1ZAX1	Eukaryotic translation initiation factor 3 subunit C	eIF3-S8	>sp|A1ZAX1|EIF3C_DROME Eukaryotic translation initiation factor 3 subunit C OS=Drosophila melanogaster GN=eIF3-S8 PE=1 SV=1	0	Both	Both	13.7297	23.9253	1	1	eIF.3c_N	1	1	1	1	1	1	1	1	1	0	1	1	5.73	0	NA	36	12	41	55	13	36	8.28199	10.7106	8.22139	11.9759	10.2593	10	6.63853	8.18053	6.57795	9.45297	8.61579	8.35658	105.65	910	0	34.8
139	A1ZAY3;B7YZJ4			>tr|A1ZAY3|A1ZAY3_DROME CG4975, isoform A OS=Drosophila melanogaster GN=CG4975 PE=4 SV=1;>tr|B7YZJ4|B7YZJ4_DROME CG4975, isoform C OS=Drosophila melanogaster GN=CG4975 PE=4 SV=1	0		Both	0	0	0	0	NA	NA	0	0	0	NA	NA	NA	N/A	N/A	N/A	N/A	N/A	6.01	0	NA	0	0	2	0	0	3					7.66139	7.27261					6.51526	6.12649	39.715	352;418	7.8309e-27	0
140	A1ZAY5			>tr|A1ZAY5|A1ZAY5_DROME CG34195 OS=Drosophila melanogaster GN=CG34195 PE=2 SV=2	0		254nm (YW) unique	NA	0	0	0	NA	NA	0	0	0	NA	NA	NA	N/A	N/A	N/A	N/A	N/A	5.95	0	NA	0	0	0	0	0	3						7.72981						6.58369	33.183	283	7.7862e-07	0
141	A1ZAZ7			>tr|A1ZAZ7|A1ZAZ7_DROME CG18635 OS=Drosophila melanogaster GN=CG18635 PE=4 SV=1	0		365nm (X490) unique	0	NA	0	0	NA	NA	0	0	0	NA	NA	NA	N/A	N/A	N/A	N/A	N/A	5.58	0	NA	0	0	1	0	0	0					8.37182						6.92467		74.414	649	0.0032009	0
142	A1ZAZ9			>tr|A1ZAZ9|A1ZAZ9_DROME CG33981, isoform A OS=Drosophila melanogaster GN=fab1-RA PE=4 SV=1	0		Both	0	0	0	0	NA	NA	0	0	0	NA	NA	NA	N/A	N/A	N/A	N/A	N/A	3.81	0	NA	0	0	1	0	0	3					7.51855	8.24748					6.9165	7.64542	8.8248	80	2.5896e-13	0
143	Q9UAS6;A1ZB00	FtsJ methyltransferase domain-containing protein 1 homolog	aft	>sp|Q9UAS6|CMTR2_DROME Cap-specific mRNA (nucleoside-2-O-)-methyltransferase 2 OS=Drosophila melanogaster GN=cmtr2 PE=2 SV=1;>tr|A1ZB00|A1ZB00_DROME Adrift OS=Drosophila melanogaster GN=aft PE=4 SV=1	0	254nm (YW) unique	365nm (X490) unique	0	YW whole not available	0	1	FtsJ	1	1	1	0	0	0	0	0	0	0	0	0	6.1	0	NA	0	1	7	6	0	0	6.19775			8.64979	8.32883		4.64145			6.45828	6.77252		80.501	700;700	6.1414e-83	0
144	A1ZB14		elk	>tr|A1ZB14|A1ZB14_DROME Eag-like K[+] channel OS=Drosophila melanogaster GN=Elk PE=1 SV=1	0		Both	0	0	0	0	NA	NA	0	0	0	NA	NA	NA	N/A	N/A	N/A	N/A	N/A	6.78	0	no	0	0	1	0	0	1					7.9523	8.26986					6.22804	6.54559	141.38	1284	0.00068365	0
145	A1ZB29			>tr|A1ZB29|A1ZB29_DROME CG5757 OS=Drosophila melanogaster GN=CG5757 PE=3 SV=1	0		Both	0	0	0	0	NA	NA	0	0	1	NA	NA	NA	N/A	N/A	N/A	N/A	N/A	6.97	0	NA	0	0	15	0	0	11					9.25537	9.19923					8.10924	8.05312	23.818	211	6.406e-63	0
146	A1ZB42	Mediator of RNA polymerase II transcription subunit 9	MED9	>sp|A1ZB42|MED9_DROME Mediator of RNA polymerase II transcription subunit 9 OS=Drosophila melanogaster GN=MED9 PE=2 SV=1	0		254nm (YW) unique	NA	0	0	0	NA	NA	0	0	1	NA	NA	NA	N/A	N/A	N/A	N/A	N/A	5.12	0	NA	0	0	0	0	0	3						8.22081						7.61876	16.808	144	2.0415e-10	0
147	A1ZB61			>tr|A1ZB61|A1ZB61_DROME CG15067, isoform A OS=Drosophila melanogaster GN=CG15067 PE=4 SV=1	0		254nm (YW) unique	NA	0	0	0	NA	NA	0	0	0	NA	NA	NA	N/A	N/A	N/A	N/A	N/A	9.46	0	NA	0	0	0	0	0	1						7.27066						6.49251	15.823	154	1.4124e-12	0
148	A1ZB68		GstE3	>tr|A1ZB68|A1ZB68_DROME FI01423p OS=Drosophila melanogaster GN=GstE3 PE=2 SV=1	0		254nm (YW) unique	NA	0	0	0	NA	NA	0	0	0	NA	NA	NA	N/A	N/A	N/A	N/A	N/A	6.97	0	NA	0	0	0	0	0	7						8.57573						7.46178	24.947	220	1.426e-19	0
149	A1ZB71;Q4V6J1		GstE6	>tr|A1ZB71|A1ZB71_DROME Glutathione S transferase E6 OS=Drosophila melanogaster GN=GstE6 PE=3 SV=1	0		Both	0	0	0	0	NA	NA	0	0	0	NA	NA	NA	N/A	N/A	N/A	N/A	N/A	5.84	0	NA	0	0	14	0	0	13					9.81968	10.3073					8.77829	9.26588	25.014	222;240	0	0
150	A1ZB72		GstE7	>tr|A1ZB72|A1ZB72_DROME Glutathione S transferase E7 OS=Drosophila melanogaster GN=GstE7 PE=3 SV=1	0		Both	0	0	0	0	NA	NA	0	0	0	NA	NA	NA	N/A	N/A	N/A	N/A	N/A	6.12	0	NA	0	0	7	0	0	9					8.77381	9.22453					7.77381	8.22453	25.51	223	0	0
151	A1ZB73		GstE8	>tr|A1ZB73|A1ZB73_DROME Glutathione S transferase E8 OS=Drosophila melanogaster GN=GstE8 PE=3 SV=1	0		Both	0	0	0	0	NA	NA	0	0	0	NA	NA	NA	N/A	N/A	N/A	N/A	N/A	5.74	0	NA	0	0	5	0	0	6					8.53682	8.73772					7.49542	7.69633	24.889	222	9.6688e-37	0
152	A1ZB80;A1ZB77;E1JGL5;A1ZB83;Q7JRI6;A1ZB78;A1ZB79;A1ZB82		CG5174-RA	>tr|A1ZB80|A1ZB80_DROME CG5174, isoform A OS=Drosophila melanogaster GN=CG5174-RA PE=2 SV=1;>tr|A1ZB77|A1ZB77_DROME CG5174, isoform J OS=Drosophila melanogaster GN=CG5174 PE=4 SV=1;>tr|E1JGL5|E1JGL5_DROME CG5174, isoform L OS=Drosophila melanogaster GN=CG5	0		Both	0	0	0	0	NA	NA	0	0	0	NA	NA	NA	N/A	N/A	N/A	N/A	N/A	5.27	0	NA	0	0	10	0	0	12					9.7028	10.3179					8.74856	9.36365	22.557	208;186;209;355;188;166;202;99	0	0
153	A1ZBA5		mRpS28	>tr|A1ZBA5|A1ZBA5_DROME FI07234p OS=Drosophila melanogaster GN=mRpS28 PE=2 SV=1	0	254nm (YW) unique	Both	0	5.22918	0	1	MRP.S35	1	1	1	1	1	1	0	0	0	0	0	0	8.91	1	NA	0	0	3	3	0	2				9.08361	8.12107	7.98056				7.41652	7.12107	6.98056	21.271	194	3.5627e-85	0
154	A8E6M1;A1ZBB4;E1JGL8;Q8MRW8			>tr|A8E6M1|A8E6M1_DROME CG30122, isoform D OS=Drosophila melanogaster GN=CG30122 PE=2 SV=1;>tr|A1ZBB4|A1ZBB4_DROME CG30122, isoform B OS=Drosophila melanogaster GN=CG30122 PE=4 SV=1;>tr|E1JGL8|E1JGL8_DROME CG30122, isoform C OS=Drosophila melanogaster GN=C	0	Both	Both	59.3959	20.6013	0	1	SAP	1	1	1	1	1	1	0	0	0	1	0	0	4.91	0	NA	28	6	29	43	13	27	7.7158	10.772	8.45853	11.6931	9.67946	9.80292	6.03455	8.19904	6.77728	9.15311	7.99821	8.12169	140.44	1271;1271;1272;469	0	24.5
155	A1ZBE8	Protein dopey-1 homolog	CG15099	>sp|A1ZBE8|DOP1_DROME Protein dopey-1 homolog OS=Drosophila melanogaster GN=CG15099 PE=1 SV=1	0		Both	0	0	0	0	NA	NA	0	0	0	NA	NA	NA	N/A	N/A	N/A	N/A	N/A	6.14	0	NA	0	0	7	0	0	1					8.07496	7.79568					5.99218	5.71289	291.18	2599	1.6325e-21	0
156	A1ZBE9			>tr|A1ZBE9|A1ZBE9_DROME CG15100 OS=Drosophila melanogaster GN=CG15100 PE=3 SV=1	0	365nm (X490) unique	Both	0.174134	0.0214375	0	1	tRNA.synt_1g	1	1	1	1	0	0	0	1	0	0	1	0	8.72	0	NA	5	2	46	1	0	25	7.10971	8.54209		7.66677	10.167	9.055	5.33885	6.06412		5.33286	8.39616	7.28416	112.48	1022	0	6.7
157	A1ZBF1		CG18190-RB	>tr|A1ZBF1|A1ZBF1_DROME CG18190 OS=Drosophila melanogaster GN=CG18190-RB PE=2 SV=2	0	254nm (YW) unique	Both	0.347486	0.050426	0	0	NA	NA	0	0	0	0	0	0	0	0	0	0	0	5.38	0	NA	1	2	12	7	0	16	7.63611	8.47162		9.48926	9.80234	10.3722	6.52216	6.6564		7.67844	8.68839	9.25825	28.743	248	2.2721e-251	4
158	A1ZBH1;Q7K4M9;A8DYI9			>tr|A1ZBH1|A1ZBH1_DROME CG15118, isoform D OS=Drosophila melanogaster GN=CG15118 PE=4 SV=1;>tr|Q7K4M9|Q7K4M9_DROME CG15118, isoform A OS=Drosophila melanogaster GN=CG15118 PE=2 SV=1;>tr|A8DYI9|A8DYI9_DROME CG15118, isoform E OS=Drosophila melanogaster GN=C	0		Both	0	0	0	0	NA	NA	0	0	0	NA	NA	NA	N/A	N/A	N/A	N/A	N/A	4.88	0	NA	0	0	10	0	0	6					8.45532	8.16965					7.04033	6.75467	66.208	592;637;630	8.0275e-32	0
159	A1ZBJ2			>tr|A1ZBJ2|A1ZBJ2_DROME CG7461 OS=Drosophila melanogaster GN=CG7461 PE=3 SV=2	0	Both	Both	0.0971088	0.15105	0	0	NA	NA	0	0	0	0	0	0	0	0	0	0	0	7.63	0	NA	2	1	30	9	0	24	6.56705	8.17775		9.2438	10.0865	9.6683	5.03559	5.96932		7.03346	8.55499	8.13682	68.367	627	0	3.5
160	A1ZBK7		cer	>tr|A1ZBK7|A1ZBK7_DROME Crammer OS=Drosophila melanogaster GN=cer PE=1 SV=1	0		Both	0	0	0	0	NA	NA	0	0	0	NA	NA	NA	N/A	N/A	N/A	N/A	N/A	5.72	0	NA	0	0	2	0	0	4					8.17837	9.10995					7.70124	8.63283	9.4636	79	3.2484e-17	0
161	A1ZBM2		TBCB	>tr|A1ZBM2|A1ZBM2_DROME CG11242 OS=Drosophila melanogaster GN=TBCB PE=1 SV=1	0		Both	0.344728	0.00215462	0	0	NA	NA	0	0	0	NA	NA	NA	N/A	N/A	N/A	N/A	N/A	5.06	0	NA	1	1	9	1	0	12	6.58404	7.79572		7.34585	9.18585	9.75548	5.4701	6.03647		5.69243	8.07192	8.64153	26.974	244	0	6.1
162	A1ZBP8;A1ZBP9		Obp56c	>tr|A1ZBP8|A1ZBP8_DROME Odorant-binding protein 56c, isoform A OS=Drosophila melanogaster GN=Obp56c PE=4 SV=1;>tr|A1ZBP9|A1ZBP9_DROME Odorant-binding protein 56c, isoform B OS=Drosophila melanogaster GN=Obp56c PE=4 SV=1	0		254nm (YW) unique	NA	0	0	0	NA	NA	0	0	0	NA	NA	NA	N/A	N/A	N/A	N/A	N/A	4.9	0	NA	0	0	0	0	0	1						7.68648						6.6451	23.691	208;245	0.05439	0
163	A1ZBR2		18w	>tr|A1ZBR2|A1ZBR2_DROME 18 wheeler OS=Drosophila melanogaster GN=18w PE=4 SV=1	0		365nm (X490) unique	0	NA	0	0	NA	NA	0	0	0	NA	NA	NA	N/A	N/A	N/A	N/A	N/A	6.01	0	NA	0	0	1	0	1	0			8.38625		8.23345				6.58691		6.43411		154.82	1385	0.00020987	0
164	A1ZBT5	Mediator of RNA polymerase II transcription subunit 8	MED8	>sp|A1ZBT5|MED8_DROME Mediator of RNA polymerase II transcription subunit 8 OS=Drosophila melanogaster GN=MED8 PE=2 SV=1	0		Both	0	0	0	0	NA	NA	0	0	1	NA	NA	NA	N/A	N/A	N/A	N/A	N/A	7.83	0	no	0	0	3	0	0	6					8.17003	8.6476					6.93959	7.41716	27.948	252	4.4264e-25	0
165	A1ZBU5			>tr|A1ZBU5|A1ZBU5_DROME CG13422 OS=Drosophila melanogaster GN=CG13422 PE=4 SV=1	0		254nm (YW) unique	NA	0	0	0	NA	NA	0	0	0	NA	NA	NA	N/A	N/A	N/A	N/A	N/A	6.97	0	maybe	0	0	0	0	0	1						7.8702						6.96711	17.131	152	1.2859e-10	0
166	A1ZBU8			>tr|A1ZBU8|A1ZBU8_DROME CG18067 OS=Drosophila melanogaster GN=CG18067 PE=4 SV=1	0		Both	0	0	0	0	NA	NA	0	0	0	NA	NA	NA	N/A	N/A	N/A	N/A	N/A	5.07	0	NA	0	0	4	0	0	10					9.20575	9.83356					8.30266	8.93047	26.229	245	4.6765e-87	0
167	A1ZBV0			>tr|A1ZBV0|A1ZBV0_DROME CG13427 OS=Drosophila melanogaster GN=CG13427 PE=4 SV=1	0		254nm (YW) unique	NA	0.272151	0	0	NA	NA	0	0	0	NA	NA	NA	N/A	N/A	N/A	N/A	N/A	9.05	0	NA	0	1	0	1	1	1	7.17035		6.51764	7.32207		7.632	6.69323		6.04052	6.30722		7.15488	11.676	105	0.00030641	0
168	A1ZBV5		CG18065-RA	>tr|A1ZBV5|A1ZBV5_DROME CG18065 OS=Drosophila melanogaster GN=CG18065-RA PE=4 SV=1	0		254nm (YW) unique	NA	0	0	0	NA	NA	0	0	0	NA	NA	NA	N/A	N/A	N/A	N/A	N/A	7.93	0	NA	0	0	0	0	0	1						7.41258						6.56749	11.956	105	0.00061469	0
169	A1ZBW1;A1ZBW0;A1ZBW3		bl	>tr|A1ZBW1|A1ZBW1_DROME Bancal, isoform A OS=Drosophila melanogaster GN=bl PE=2 SV=1;>tr|A1ZBW0|A1ZBW0_DROME Bancal, isoform C OS=Drosophila melanogaster GN=bl PE=2 SV=1;>tr|A1ZBW3|A1ZBW3_DROME Bancal, isoform B OS=Drosophila melanogaster GN=bl PE=4 SV=1	0	Both	Both	39.8446	33.6355	1	1	KH_3;KH_1	2;1	1	1	1	1	1	1	1	0	1	1	1	8.77	0	NA	12	7	14	18	11	14	8.64196	10.4988	9.83571	11.8855	9.60229	9.76834	7.3632	8.35098	8.55695	9.73392	8.32354	8.48959	50.235	496;502;413	0	28.8
170	A1ZBW7	WASH complex subunit FAM21 homolog	CG16742	>sp|A1ZBW7|FAM21_DROME WASH complex subunit FAM21 homolog OS=Drosophila melanogaster GN=CG16742 PE=1 SV=1	0		Both	0	0	0	0	NA	NA	0	0	0	NA	NA	NA	N/A	N/A	N/A	N/A	N/A	4.69	0	NA	0	0	2	0	0	3					7.65156	7.72526					5.75946	5.83317	160.9	1469	5.0852e-09	0
171	A2VEI2-2;A2VEI2	Calcium uptake protein 1 homolog, mitochondrial	CG4495	>sp|A2VEI2-2|MICU1_DROME Isoform A of Calcium uptake protein 1 homolog, mitochondrial OS=Drosophila melanogaster GN=CG4495;>sp|A2VEI2|MICU1_DROME Calcium uptake protein 1 homolog, mitochondrial OS=Drosophila melanogaster GN=CG4495 PE=2 SV=1	0		365nm (X490) unique	0	NA	0	0	NA	NA	0	0	0	NA	NA	NA	N/A	N/A	N/A	N/A	N/A	6.99	0	NA	0	0	2	0	0	0					7.6284						6.23045		60.272	524;525	5.1547e-05	0
172	A4IJ59		mub	>tr|A4IJ59|A4IJ59_DROME IP17311p OS=Drosophila melanogaster GN=mub PE=2 SV=1	0	254nm (YW) unique	Both	0	97.2094	1	1	KH_1;KH_3	2;1	1	1	1	1	1	1	1	0	1	1	1	8.83	0	NA	0	0	1	3	0	2				10.303	8.26026	7.84108				8.24529	6.95924	6.54005	56.209	557	0	12.7
173	P48148;A4UZI6	Ras-like GTP-binding protein Rho1	Rho1	>sp|P48148|RHO1_DROME Ras-like GTP-binding protein Rho1 OS=Drosophila melanogaster GN=Rho1 PE=1 SV=1;>tr|A4UZI6|A4UZI6_DROME Rho1, isoform C OS=Drosophila melanogaster GN=Rho1 PE=3 SV=1	0		Both	0	0	0	0	NA	NA	0	0	1	NA	NA	NA	N/A	N/A	N/A	N/A	N/A	6.61	0	NA	0	0	13	0	0	7					9.51921	8.73353					8.56497	7.77928	21.723	192;192	2.2851e-68	0
174	P41043;A4UZL5	Glutathione S-transferase S1	GstS1	>sp|P41043|GST1_DROME Glutathione S-transferase S1 OS=Drosophila melanogaster GN=GstS1 PE=1 SV=2;>tr|A4UZL5|A4UZL5_DROME Glutathione S transferase S1, isoform C OS=Drosophila melanogaster GN=GstS1 PE=2 SV=1	0	254nm (YW) unique	Both	0	0.00728813	0	0	NA	NA	0	0	0	0	0	0	0	0	0	0	0	4.57	0	NA	0	0	16	6	0	16				8.58388	10.031	10.3733				6.83955	8.91704	9.2594	27.613	249;249	0	0
175	P40320-4;P40320-3;P40320;A4UZW2;E4NKH6;M9PAY2;P40320-2	S-adenosylmethionine synthase	Sam-S	>sp|P40320-4|METK_DROME Isoform 4 of S-adenosylmethionine synthase OS=Drosophila melanogaster GN=Sam-S;>sp|P40320-3|METK_DROME Isoform 3 of S-adenosylmethionine synthase OS=Drosophila melanogaster GN=Sam-S;>sp|P40320|METK_DROME S-adenosylmethionine synthas	0		Both	0	0	0	0	NA	NA	0	0	0	NA	NA	NA	N/A	N/A	N/A	N/A	N/A	6.08	0	NA	0	0	6	0	0	3					8.75449	7.93603					7.49922	6.68076	42.196	381;408;408;408;115;138;200	8.4818e-22	0
176	A4UZX7;Q27367	Protein croquemort	crq	>tr|A4UZX7|A4UZX7_DROME Croquemort, isoform B OS=Drosophila melanogaster GN=crq PE=2 SV=1;>sp|Q27367|CRQ_DROME Protein croquemort OS=Drosophila melanogaster GN=crq PE=1 SV=2	0		Both	0	0	0	0	NA	NA	0	0	0	NA	NA	NA	N/A	N/A	N/A	N/A	N/A	4.92	0	NA	0	0	5	0	0	11					7.7019	8.83413					6.40087	7.5331	56.153	491;457	6.6655e-98	0
177	Q9XTL9;A4UZZ4	Glycogen phosphorylase;Phosphorylase	GlyP	>sp|Q9XTL9|PYG_DROME Glycogen phosphorylase OS=Drosophila melanogaster GN=GlyP PE=2 SV=2;>tr|A4UZZ4|A4UZZ4_DROME Phosphorylase OS=Drosophila melanogaster GN=GlyP PE=3 SV=1	1	Both	Both	0.221438	0.0814777	0	0	NA	NA	0	0	0	0	0	0	1	0	0	0	0	6.09	0	NA	13	8	57	25	4	48	7.59151	9.26691	7.75127	9.77725	10.7275	10.4307	5.88394	6.79223	6.04372	7.35166	9.01991	8.72309	96.996	844;844	0	19.4
178	Q27331;A4V0N4;P48602;M9PD18;Q9VK47	V-type proton ATPase catalytic subunit A isoform 2	Vha68-2	>sp|Q27331|VATA2_DROME V-type proton ATPase catalytic subunit A isoform 2 OS=Drosophila melanogaster GN=Vha68-2 PE=1 SV=2;>tr|A4V0N4|A4V0N4_DROME MIP16230p OS=Drosophila melanogaster GN=Vha68-2 PE=2 SV=1	0		Both	0.00821012	0.00311759	0	0	NA	NA	0	0	0	NA	NA	NA	N/A	N/A	N/A	N/A	N/A	5.22	0	NA	1	0	38	2	3	36		7.54841	8.36114	8.16517	10.5821	10.3542		5.37949	6.81707	6.02148	9.03806	8.81013	68.301	614;614;614;614;743	0	2
179	P54733;A4V0R4;M9NDQ2;P54733-2	G1/S-specific cyclin-E	CycE	>sp|P54733|CCNE_DROME G1/S-specific cyclin-E OS=Drosophila melanogaster GN=CycE PE=1 SV=2;>tr|A4V0R4|A4V0R4_DROME Cyclin E, isoform C OS=Drosophila melanogaster GN=CycE PE=3 SV=1;>tr|M9NDQ2|M9NDQ2_DROME Cyclin E, isoform F OS=Drosophila melanogaster GN=Cyc	0		Both	0	0	0	0	NA	NA	0	0	0	NA	NA	NA	N/A	N/A	N/A	N/A	N/A	4.67	0	NA	0	0	6	0	0	3					8.54147	7.91787					7.11012	6.4865	77.22	709;709;712;602	8.6173e-37	0
180	Q24509;A4V0S1	Syntaxin-5	Syx5	>sp|Q24509|STX5_DROME Syntaxin-5 OS=Drosophila melanogaster GN=Syx5 PE=2 SV=2;>tr|A4V0S1|A4V0S1_DROME Syntaxin 5, isoform B OS=Drosophila melanogaster GN=Syx5 PE=3 SV=1	0		Both	0	0	0	0	NA	NA	0	0	0	NA	NA	NA	N/A	N/A	N/A	N/A	N/A	6.1	0	NA	0	0	3	0	0	8					7.81659	8.79135					6.64049	7.61526	51.849	467;467	1.1069e-83	0
181	O61267-2;A4V0X0;O61267;D3DMK7	Ovarian-specific serine/threonine-protein kinase Lok	lok;lok-RC	>sp|O61267-2|LOK_DROME Isoform Short of Ovarian-specific serine/threonine-protein kinase Lok OS=Drosophila melanogaster GN=lok;>tr|A4V0X0|A4V0X0_DROME Loki, isoform C OS=Drosophila melanogaster GN=lok PE=4 SV=1;>sp|O61267|LOK_DROME Ovarian-specific serine/	0		Both	0.613873	0.581867	0	0	NA	NA	0	0	1	NA	NA	NA	N/A	N/A	N/A	N/A	N/A	9.19	0	NA	1	0	11	1	0	3		7.81639		7.94887	8.95421	7.88275		5.77142		5.96716	7.55627	6.48481	52.346	459;459;476;284	1.4366e-38	3.5
182	A4V110;Q7JMV3;Q0KIF7		CaMKI	>tr|A4V110|A4V110_DROME Calcium/calmodulin-dependent protein kinase I, isoform I OS=Drosophila melanogaster GN=CaMKI PE=4 SV=1;>tr|Q7JMV3|Q7JMV3_DROME Calcium/calmodulin dependent protein kinase I OS=Drosophila melanogaster GN=CaMKI PE=2 SV=1;>tr|Q0KIF7|Q0	0		Both	0	0	0	0	NA	NA	0	0	0	NA	NA	NA	N/A	N/A	N/A	N/A	N/A	6.1	0	NA	0	0	3	0	0	3					7.83952	8.09029					6.60907	6.85984	43.464	390;405;284	7.9433e-13	0
183	Q00168-4;A4V133;Q00168-3;A4V134;Q00168-2;Q00168;D1YSG7;D1YSG8;L0MNA2;L0MLP2;L0MLR4	Calcium/calmodulin-dependent protein kinase type II alpha chain	CaMKII	>sp|Q00168-4|KCC2A_DROME Isoform 4 of Calcium/calmodulin-dependent protein kinase type II alpha chain OS=Drosophila melanogaster GN=CaMKII;>tr|A4V133|A4V133_DROME Calcium/calmodulin-dependent protein kinase II, isoform C OS=Drosophila melanogaster GN=CaMKI	0		Both	0	0	0	0	NA	NA	0	0	0	NA	NA	NA	N/A	N/A	N/A	N/A	N/A	7.07	0	NA	0	0	10	0	0	6					8.77375	8.30957					7.35877	6.8946	55.481	490;490;509;509;516;530;530;531;482;504;522	4.5843e-53	0
184	Q9NB04;A4V1B2	Patj homolog	Patj	>sp|Q9NB04|PATJ_DROME Patj homolog OS=Drosophila melanogaster GN=Patj PE=1 SV=2;>tr|A4V1B2|A4V1B2_DROME Patj, isoform B OS=Drosophila melanogaster GN=Patj PE=4 SV=1	0		Both	0	0	0	0	NA	NA	0	0	0	NA	NA	NA	N/A	N/A	N/A	N/A	N/A	4.83	0	NA	0	0	1	0	0	6					6.9523	8.04716					5.35025	6.44509	92.851	871;871	1.662e-12	0
185	P35415;A4V1N8	Paramyosin, long form	Prm	>sp|P35415|MYSP1_DROME Paramyosin, long form OS=Drosophila melanogaster GN=Prm PE=1 SV=1;>tr|A4V1N8|A4V1N8_DROME FI03688p OS=Drosophila melanogaster GN=Prm PE=2 SV=1	0		Both	0	0	0	0	NA	NA	0	0	0	NA	NA	NA	N/A	N/A	N/A	N/A	N/A	5.46	0	NA	0	0	15	0	0	35					8.77527	9.7539					7.0677	8.04634	102.34	879;879	0	0
186	P35416;A4V1N9;M9NDM6	Paramyosin, short form	Prm	>sp|P35416|MYSP2_DROME Paramyosin, short form OS=Drosophila melanogaster GN=Prm PE=2 SV=2;>tr|A4V1N9|A4V1N9_DROME Paramyosin, isoform D OS=Drosophila melanogaster GN=Prm PE=4 SV=1	0		Both	0	0	0	0	NA	NA	0	0	0	NA	NA	NA	N/A	N/A	N/A	N/A	N/A	9.22	0	NA	0	0	1	0	0	1					7.00745	7.3537					5.45116	5.79739	74.276	640;640;307	2.1006e-238	0
187	Q9VSR3;A4V1P2;Q9VSR3-2	Probable RNA-binding protein orb2	orb2	>sp|Q9VSR3|ORB2_DROME Probable RNA-binding protein orb2 OS=Drosophila melanogaster GN=orb2 PE=1 SV=1;>tr|A4V1P2|A4V1P2_DROME Orb2, isoform B OS=Drosophila melanogaster GN=orb2 PE=4 SV=1;>sp|Q9VSR3-2|ORB2_DROME Isoform A of Probable RNA-binding protein orb2	0	254nm (YW) unique		X490 whole not available	YW whole not available	1	1	RRM_1	manual	1	1	1	1	1	0	0	0	1	0	0	7.37	0	NA	1	0	0	8	0	0		6.96527		8.97015				5.06648		6.98918			74.503	704;704;551	7.109e-47	1.7
188	A4V1Q1;Q24207-2;Q24207;A4V1Q0;M9PF25;Q6NN06	Protein boule	bol	>tr|A4V1Q1|A4V1Q1_DROME Boule, isoform C OS=Drosophila melanogaster GN=bol PE=4 SV=1;>sp|Q24207-2|BOULE_DROME Isoform 2 of Protein boule OS=Drosophila melanogaster GN=bol;>sp|Q24207|BOULE_DROME Protein boule OS=Drosophila melanogaster GN=bol PE=2 SV=1;>tr|	0	254nm (YW) unique		NA	YW whole not available	1	1	RRM_1	1	1	1	1	0	0	1	0	1	0	0	0	8.59	0	NA	0	0	0	8	3	0			7.71794	11.0813					6.87284	9.42244			20.235	189;227;228;228;233;95	7.892e-258	0
189	Q08605-2;A4V1Y7;Q08605-3;Q08605-4;Q2PDY2;Q08605;A4V1Y6;Q2PDY1;M9PFM7	Transcription factor GAGA	Trl	>sp|Q08605-2|GAGA_DROME Isoform B of Transcription factor GAGA OS=Drosophila melanogaster GN=Trl;>tr|A4V1Y7|A4V1Y7_DROME Trithorax-like, isoform C OS=Drosophila melanogaster GN=Trl PE=4 SV=1;>sp|Q08605-3|GAGA_DROME Isoform G of Transcription factor GAGA OS	0		Both	0	0	0	0	NA	NA	0	0	1	NA	NA	NA	N/A	N/A	N/A	N/A	N/A	8.73	0	yes	0	0	1	0	0	3					7.15097	7.52113					6.24788	6.61804	54.815	519;519;538;566;567;581;582;608;623	2.9265e-10	0
190	A4V2A4			>tr|A4V2A4|A4V2A4_DROME Mushroom-body expressed, isoform G OS=Drosophila melanogaster GN=mub PE=4 SV=1	0			NA	YW whole not available	0	1	KH_1	3	1	1	0	NA	NA	NA	N/A	N/A	N/A	N/A	N/A	8.79	0	NA	0	0	0	1	0	0				9.15777						7.22996			37.881	359	0	26.2
191	P08181;A4V2B8	Casein kinase II subunit alpha	CkIIalpha	>sp|P08181|CSK2A_DROME Casein kinase II subunit alpha OS=Drosophila melanogaster GN=CkIIalpha PE=1 SV=2;>tr|A4V2B8|A4V2B8_DROME Casein kinase IIalpha, isoform C OS=Drosophila melanogaster GN=CkIIalpha PE=4 SV=1	0	Both	Both	0.155006	0.0211313	0	0	NA	NA	0	0	1	0	0	0	0	1	0	0	0	6.72	0	NA	3	0	16	5	0	17		8.41189		8.75426	10.0981	10.0689		6.46028		6.85608	8.84286	8.81362	39.959	336;336	0	14.9
192	Q7KNC5;Q8MSQ5;Q8IPN9;B7Z0T3;A4V2F2;Q9VNA1;Q0KIB9;B7Z0T6;Q8IPN8;Q4ABH3;Q9VNA2		mtd	>tr|Q7KNC5|Q7KNC5_DROME L(3)82Fd, isoform O OS=Drosophila melanogaster GN=mtd PE=2 SV=1;>tr|Q8MSQ5|Q8MSQ5_DROME L(3)82Fd, isoform G OS=Drosophila melanogaster GN=mtd PE=2 SV=1;>tr|Q8IPN9|Q8IPN9_DROME L(3)82Fd, isoform K OS=Drosophila melanogaster GN=mtd PE	0		Both	0	0	0	0	NA	NA	0	0	0	NA	NA	NA	N/A	N/A	N/A	N/A	N/A	5.19	0	NA	0	0	5	0	0	1					8.02518	7.01957					6.3009	5.29528	111.51	1025;1033;1055;1106;1246;1270;1314;789;869;1012;678	8.4586e-13	0
193	P15364;A4V2I0;Q7KSX2	Protein amalgam	Ama	>sp|P15364|AMAL_DROME Protein amalgam OS=Drosophila melanogaster GN=Ama PE=2 SV=2;>tr|A4V2I0|A4V2I0_DROME Amalgam, isoform C OS=Drosophila melanogaster GN=Ama PE=4 SV=1;>tr|Q7KSX2|Q7KSX2_DROME Amalgam, isoform B OS=Drosophila melanogaster GN=Ama PE=4 SV=1	0		Both	0	0	0	0	NA	NA	0	0	0	NA	NA	NA	N/A	N/A	N/A	N/A	N/A	6.39	0	NA	0	0	4	0	0	5					8.27346	8.75437					6.99471	7.47561	36.387	333;333;341	2.6663e-41	0
194	P06605;P06603;A4V2J2	Tubulin alpha-3 chain;Tubulin alpha-1 chain	alphaTub84D;alphaTub84B	>sp|P06605|TBA3_DROME Tubulin alpha-3 chain OS=Drosophila melanogaster GN=alphaTub84D PE=2 SV=1;>sp|P06603|TBA1_DROME Tubulin alpha-1 chain OS=Drosophila melanogaster GN=alphaTub84B PE=2 SV=1;>tr|A4V2J2|A4V2J2_DROME Alpha-Tubulin at 84D, isoform B OS=Droso	0	365nm (X490) unique	Both	1.21039	0.243878	0	0	NA	NA	0	1	1	0	0	0	1	0	0	0	0	5	0	NA	10	10	32	18	14	30	9.06778	10.4473	9.90476	10.7058	11.0725	10.8148	7.74556	8.26024	8.58254	8.59732	9.75024	9.49262	49.89	450;450;450	0	29.8
195	P22058;A4V2K7	Chromosomal protein D1	D1	>sp|P22058|CPD1_DROME Chromosomal protein D1 OS=Drosophila melanogaster GN=D1 PE=1 SV=3;>tr|A4V2K7|A4V2K7_DROME D1 chromosomal protein, isoform C OS=Drosophila melanogaster GN=D1 PE=4 SV=1	0		Both	0	0	0	0	NA	NA	0	0	0	NA	NA	NA	N/A	N/A	N/A	N/A	N/A	6.23	0	yes	0	0	7	0	0	10					8.76728	9.54807					7.59119	8.37197	37	355;355	5.1231e-205	0
196	O46036-2;A4V2S3		CtBP	>sp|O46036-2|CTBP_DROME Isoform A of C-terminal-binding protein OS=Drosophila melanogaster GN=CtBP;>tr|A4V2S3|A4V2S3_DROME C-terminal binding protein, isoform B OS=Drosophila melanogaster GN=CtBP PE=3 SV=1	0	254nm (YW) unique	Both	0.207758	1.88859	0	0	NA	NA	0	0	1	0	0	0	0	0	0	0	0	6.35	0	maybe	1	0	16	9	0	11		7.93051		9.75097	9.52938	9.0412		5.97298		7.73382	8.22835	7.74016	42.251	386;386	1.134e-220	2.8
197	E1JIM1;Q0KI68;E1JIM0;A4V2Z1		wah	>tr|E1JIM1|E1JIM1_DROME CG4699, isoform J OS=Drosophila melanogaster GN=wah PE=4 SV=1;>tr|Q0KI68|Q0KI68_DROME CG4699, isoform F OS=Drosophila melanogaster GN=wah PE=4 SV=2;>tr|E1JIM0|E1JIM0_DROME CG4699, isoform E OS=Drosophila melanogaster GN=wah PE=4 SV=	0		365nm (X490) unique	0	YW whole not available	0	0	NA	NA	0	0	0	NA	NA	NA	N/A	N/A	N/A	N/A	N/A	7.91	0	NA	0	0	1	1	0	0				8.06566	7.5063					5.89354	5.92652		99.089	936;1548;1549;1550	4.9166e-54	0
198	P48605;A4V303	T-complex protein 1 subunit gamma	Cctgamma	>sp|P48605|TCPG_DROME T-complex protein 1 subunit gamma OS=Drosophila melanogaster GN=Cctgamma PE=2 SV=2;>tr|A4V303|A4V303_DROME Cctgamma, isoform B OS=Drosophila melanogaster GN=Cctgamma PE=3 SV=1	0	Both	Both	0.189792	0.308418	0	0	NA	NA	0	0	1	0	1	0	1	0	0	0	0	6.37	0	NA	10	5	44	23	10	39	7.84346	9.18975	7.73614	10.2858	10.7237	10.3238	6.31199	6.89756	6.20466	7.99895	9.1922	8.79228	59.394	544;544	0	24.8
199	A4V364;A8JR54;Q8IN47;Q8IN48;Q9VDI8;Q7KSA0;Q95TW4		Syp	>tr|A4V364|A4V364_DROME CG17838, isoform F OS=Drosophila melanogaster GN=Syp PE=4 SV=1;>tr|A8JR54|A8JR54_DROME CG17838, isoform H OS=Drosophila melanogaster GN=Syp PE=4 SV=1;>tr|Q8IN47|Q8IN47_DROME CG17838, isoform A OS=Drosophila melanogaster GN=Syp PE=4	0			NA	YW whole not available	1	1	RRM_1	3	1	1	1	NA	NA	NA	N/A	N/A	N/A	N/A	N/A	8.23	0	NA	0	0	0	5	1	0			7.99518	8.50755					6.56381	6.4514			59.402	529;534;563;571;707;711;529	3.2434e-55	0
200	P91929;A4V383	NADH dehydrogenase [ubiquinone] 1 alpha subcomplex subunit 10, mitochondrial	ND42	>sp|P91929|NDUAA_DROME NADH dehydrogenase [ubiquinone] 1 alpha subcomplex subunit 10, mitochondrial OS=Drosophila melanogaster GN=ND42 PE=2 SV=2;>tr|A4V383|A4V383_DROME NADH:ubiquinone reductase 42kD subunit, isoform B OS=Drosophila melanogaster GN=ND42 PE	0	365nm (X490) unique	Both	0.130423	0	0	0	NA	NA	0	0	0	0	0	0	0	0	0	0	0	5.18	0	NA	2	1	16	0	0	13	6.63163	8.06035			9.85068	9.15993	5.28921	6.05069			8.50826	7.81752	46.897	407;407	2.3625e-203	6.1
201	P12613;A4V391	T-complex protein 1 subunit alpha	T-cp1	>sp|P12613|TCPA_DROME T-complex protein 1 subunit alpha OS=Drosophila melanogaster GN=T-cp1 PE=2 SV=2;>tr|A4V391|A4V391_DROME T-complex protein 1 subunit alpha OS=Drosophila melanogaster GN=T-cp1 PE=3 SV=1	0	Both	Both	0.244803	0.271551	0	0	NA	NA	0	0	0	0	1	0	1	1	0	1	0	6.03	0	NA	9	4	28	20	9	27	7.76187	9.26984	7.94681	10.3349	10.6866	10.4246	6.25672	6.99733	6.44165	8.07081	9.18144	8.91943	59.556	557;557	0	18.5
202	Q7KRY6;A4V3G8	Nucleosomal histone kinase 1	ball	>sp|Q7KRY6|NHK1_DROME Nucleosomal histone kinase 1 OS=Drosophila melanogaster GN=ball PE=1 SV=1;>tr|A4V3G8|A4V3G8_DROME Ballchen, isoform B OS=Drosophila melanogaster GN=ball PE=4 SV=1	0	Both	Both	0.626253	0.879084	0	0	NA	NA	0	0	0	0	0	0	1	0	0	1	0	9.86	0	NA	2	0	7	3	0	2		7.77406		8.5141	8.90673	8.2273		5.61203		6.37033	7.38821	6.70877	65.993	599;599	6.3365e-28	3.7
203	Q7KRW1-2;A4V3L3;Q7KRW1;Q7KRW1-3	Protein TRC8 homolog	Trc8	>sp|Q7KRW1-2|TRC8_DROME Isoform A of Protein TRC8 homolog OS=Drosophila melanogaster GN=Trc8;>tr|A4V3L3|A4V3L3_DROME Trc8, isoform B OS=Drosophila melanogaster GN=Trc8 PE=4 SV=1;>sp|Q7KRW1|TRC8_DROME Protein TRC8 homolog OS=Drosophila melanogaster GN=Trc8	0		365nm (X490) unique	0	NA	0	0	NA	NA	0	0	0	NA	NA	NA	N/A	N/A	N/A	N/A	N/A	6.56	0	NA	0	0	2	0	0	0					7.40559						5.92846		88.748	804;804;809;462	3.1774e-06	0
204	Q9VAF0;A4V3L8	Uncharacterized protein CG7816	CG7816	>sp|Q9VAF0|Y816_DROME Uncharacterized protein CG7816 OS=Drosophila melanogaster GN=CG7816 PE=2 SV=1;>tr|A4V3L8|A4V3L8_DROME CG7816, isoform D OS=Drosophila melanogaster GN=Zip99C PE=4 SV=1	0		Both	0	0	0	0	NA	NA	0	0	0	NA	NA	NA	N/A	N/A	N/A	N/A	N/A	5.18	0	NA	0	0	2	0	0	3					7.91331	7.99473					6.91331	6.99473	38.869	355;355	6.5092e-42	0
205	P05303;A4V3Q6	Elongation factor 1-alpha 2;Elongation factor 1-alpha	Ef1alpha100E	>sp|P05303|EF1A2_DROME Elongation factor 1-alpha 2 OS=Drosophila melanogaster GN=Ef1alpha100E PE=2 SV=2;>tr|A4V3Q6|A4V3Q6_DROME Elongation factor 1-alpha OS=Drosophila melanogaster GN=Ef1alpha100E PE=3 SV=1	0		365nm (X490) unique	NA	NA	1	1	GTP_EFTU;GTP_EFTU_D2;GTP_EFTU_D3	1;1;1	1	1	1	NA	NA	NA	N/A	N/A	N/A	N/A	N/A	9.07	0	NA	0	0	1	0	0	0													50.662	462;462	0	15.2
206	P18431;A4V3W2;P18431-3;A4V3W1;P18431-4;Q0KHW6;P18431-1;M9PGC4;M9PGV7;A8JUV9;Q7KVY5;C0PUX5	Protein kinase shaggy	sgg	>sp|P18431|SGG_DROME Protein kinase shaggy OS=Drosophila melanogaster GN=sgg PE=1 SV=3;>tr|A4V3W2|A4V3W2_DROME Shaggy, isoform C OS=Drosophila melanogaster GN=sgg PE=4 SV=1;>sp|P18431-3|SGG_DROME Isoform SGG39 of Protein kinase shaggy OS=Drosophila melanog	0	254nm (YW) unique	Both	0.192515	2.43678	0	0	NA	NA	0	0	0	0	0	0	0	1	0	0	0	8.95	0	no	1	1	16	14	4	10	6.60052	7.59183	7.10911	9.86389	9.25183	9.03519	5.23877	5.60166	5.74738	7.77779	7.89012	7.67344	53.871	514;514;575;575;496;597;1067;1126;1168;772;416;441	7.7472e-198	1.8
207	Q9U1M2;A4V3W8	Transmembrane protein 120 homolog	CG32795	>sp|Q9U1M2|TM120_DROME Transmembrane protein 120 homolog OS=Drosophila melanogaster GN=CG32795 PE=1 SV=1;>tr|A4V3W8|A4V3W8_DROME CG32795, isoform C OS=Drosophila melanogaster GN=CG32795 PE=4 SV=1	0		365nm (X490) unique	0	NA	0	0	NA	NA	0	0	0	NA	NA	NA	N/A	N/A	N/A	N/A	N/A	9.42	0	NA	0	0	3	0	0	0					8.30432						7.1002		45.486	387;387	1.7778e-16	0
208	P49071;A4V402	MAP kinase-activated protein kinase 2	MAPk-Ak2	>sp|P49071|MAPK2_DROME MAP kinase-activated protein kinase 2 OS=Drosophila melanogaster GN=MAPk-Ak2 PE=2 SV=1;>tr|A4V402|A4V402_DROME LD26767p OS=Drosophila melanogaster GN=MAPk-Ak2 PE=2 SV=1	0		Both	0	0	0	0	NA	NA	0	0	0	NA	NA	NA	N/A	N/A	N/A	N/A	N/A	6.99	0	NA	0	0	7	0	0	5					8.49965	7.81405					7.17742	6.49182	41.401	359;359	2.3974e-24	0
209	Q24524;A4V441	Protein singed	sn	>sp|Q24524|SING_DROME Protein singed OS=Drosophila melanogaster GN=sn PE=3 SV=1;>tr|A4V441|A4V441_DROME Singed, isoform B OS=Drosophila melanogaster GN=sn PE=3 SV=1	0	254nm (YW) unique	Both	0.118237	6.93809	0	0	NA	NA	0	0	0	1	0	0	0	0	0	0	0	6.55	0	NA	1	1	22	10	0	5	6.91205	7.74002		9.42594	9.59949	8.17493	5.53184	5.7191		7.35349	8.21927	6.79472	57.278	512;512	2.1278e-229	2
210	Q9W3K5;A4V448	Glutamate--cysteine ligase	Gclc	>sp|Q9W3K5|GSH1_DROME Glutamate--cysteine ligase OS=Drosophila melanogaster GN=Gclc PE=2 SV=1;>tr|A4V448|A4V448_DROME Glutamate-cysteine ligase catalytic subunit, isoform B OS=Drosophila melanogaster GN=Gclc PE=4 SV=1	0		Both	0	0	0	0	NA	NA	0	0	0	NA	NA	NA	N/A	N/A	N/A	N/A	N/A	5.8	0	NA	0	0	18	0	0	7					9.16673	8.42575					7.58692	6.84595	80.745	717;717	1.3542e-111	0
211	Q94511;A4V449	NADH-ubiquinone oxidoreductase 75 kDa subunit, mitochondrial	ND75	>sp|Q94511|NDUS1_DROME NADH-ubiquinone oxidoreductase 75 kDa subunit, mitochondrial OS=Drosophila melanogaster GN=ND75 PE=2 SV=3;>tr|A4V449|A4V449_DROME NADH:ubiquinone reductase 75kD subunit, isoform B OS=Drosophila melanogaster GN=ND75 PE=4 SV=1	0	365nm (X490) unique	Both	0.479948	0.0189231	0	0	NA	NA	0	0	0	0	0	0	0	0	0	0	0	5.89	0	NA	5	4	28	1	0	19	7.16542	8.76988		7.49944	9.93563	8.95417	5.56336	6.44184		5.34663	8.33357	7.35211	78.629	731;731	0	8.5
212	Q07152;A4V488;Q07152-2	Inosine-5-monophosphate dehydrogenase	ras	>sp|Q07152|IMDH_DROME Inosine-5-monophosphate dehydrogenase OS=Drosophila melanogaster GN=ras PE=1 SV=1;>tr|A4V488|A4V488_DROME Inosine-5-monophosphate dehydrogenase OS=Drosophila melanogaster GN=ras PE=2 SV=1;>sp|Q07152-2|IMDH_DROME Isoform B of Inosine	0		Both	0	0	0	0	NA	NA	0	0	1	NA	NA	NA	N/A	N/A	N/A	N/A	N/A	7.1	0	NA	0	1	22	0	3	18	6.26266		7.16059		9.98019	9.49563	5.00741		5.90533		8.72492	8.24035	57.829	537;537;446	0	0
213	Q960Z0;A4V4A1	Kinesin-like protein Klp10A	Klp10A	>sp|Q960Z0|KI10A_DROME Kinesin-like protein Klp10A OS=Drosophila melanogaster GN=Klp10A PE=1 SV=1;>tr|A4V4A1|A4V4A1_DROME Klp10A, isoform B OS=Drosophila melanogaster GN=Klp10A PE=3 SV=1	0	Both	Both	1.89448	2.68838	0	0	NA	NA	0	0	0	0	0	0	0	0	0	1	0	6.78	0	NA	6	2	22	13	1	15	7.34161	9.02063	6.75553	9.97101	9.56935	9.09174	5.78532	6.71761	5.19923	7.68245	8.01305	7.53543	88.671	805;805	0	8.7
214	Q9VZ23;A4V4A5	GTP-binding nuclear protein Ran	ran	>sp|Q9VZ23|RAN_DROME GTP-binding nuclear protein Ran OS=Drosophila melanogaster GN=ran PE=1 SV=1;>tr|A4V4A5|A4V4A5_DROME Ran, isoform B OS=Drosophila melanogaster GN=Ran PE=4 SV=1	0	254nm (YW) unique	Both	0.359386	0.274246	0	0	NA	NA	0	1	1	1	1	0	1	1	1	1	0	7.66	0	NA	7	7	18	11	6	17	8.71567	9.50534	8.22321	10.0505	10.7359	10.1567	7.56954	7.57237	7.07708	8.16622	9.58974	9.01055	24.708	216;216	0	36.6
215	P08182-3;A4V4C1;M9NGA3;M9NDU6;M9PHA6;P08182	Casein kinase II subunit beta	CkIIbeta	>sp|P08182-3|CSK2B_DROME Isoform B of Casein kinase II subunit beta OS=Drosophila melanogaster GN=CkIIbeta;>tr|A4V4C1|A4V4C1_DROME Casein kinase II beta subunit, isoform C OS=Drosophila melanogaster GN=CkIIbeta PE=2 SV=1;>tr|M9NGA3|M9NGA3_DROME Casein kina	0		Both	0.100993	0	0	0	NA	NA	0	0	0	NA	NA	NA	N/A	N/A	N/A	N/A	N/A	5.17	0	NA	1	2	9	0	0	8	7.0083	7.78009			9.70469	9.56934	6.0083	6.13605			8.70469	8.56934	24.829	215;215;233;233;234;235	0	5.1
216	E1JJL2;O61492-3;O61492-2;A4V4F2;M9PHT0;O61492;F2FB46;M9PJN2;M9PHL7;O61492-4;C9QP31	Flotillin-2	Flo-2;Flo-2-RA	>tr|E1JJL2|E1JJL2_DROME Flotillin-2, isoform G OS=Drosophila melanogaster GN=Flo-2 PE=4 SV=1;>sp|O61492-3|FLOT2_DROME Isoform C of Flotillin-2 OS=Drosophila melanogaster GN=Flo-2;>sp|O61492-2|FLOT2_DROME Isoform B of Flotillin-2 OS=Drosophila melanogaster	0		Both	0	0	0	0	NA	NA	0	0	0	NA	NA	NA	N/A	N/A	N/A	N/A	N/A	5.89	0	NA	0	0	1	0	0	2					6.62143	7.62493					5.25969	6.26321	37.605	340;401;425;425;435;438;438;440;448;281;281	1.5513e-06	0
217	P26308;A4V4I0	Guanine nucleotide-binding protein subunit beta-1	Gbeta13F	>sp|P26308|GBB1_DROME Guanine nucleotide-binding protein subunit beta-1 OS=Drosophila melanogaster GN=Gbeta13F PE=1 SV=1;>tr|A4V4I0|A4V4I0_DROME G protein beta-subunit 13F, isoform B OS=Drosophila melanogaster GN=Gbeta13F PE=4 SV=1	0		Both	0	0	0	0	NA	NA	0	0	0	NA	NA	NA	N/A	N/A	N/A	N/A	N/A	5.99	0	NA	0	0	7	0	0	6					9.08034	8.55513					7.96641	7.44119	37.133	340;340	2.1327e-46	0
218	P27619;A4V4I8;E1JJA4;M9PHQ0;P27619-2;A4V4J0;M9PJN9;E1JJA5	Dynamin	shi	>sp|P27619|DYN_DROME Dynamin OS=Drosophila melanogaster GN=shi PE=1 SV=2;>tr|A4V4I8|A4V4I8_DROME Shibire, isoform F OS=Drosophila melanogaster GN=shi PE=3 SV=1;>tr|E1JJA4|E1JJA4_DROME Shibire, isoform L OS=Drosophila melanogaster GN=shi PE=3 SV=1;>tr|M9PHQ	0	Both	Both	0.702331	0.27032	0	0	NA	NA	0	0	1	0	1	0	1	1	0	1	0	8.53	0	NA	8	3	38	3	0	11	7.50454	8.85903		8.2425	9.85206	8.48777	5.78027	6.4014		5.9129	8.12778	6.7635	97.808	877;877;883;896;830;830;834;836	4.2605e-258	9
219	Q94981;A4V4Q7	Protein ariadne-1	ari-1	>sp|Q94981|ARI1_DROME Protein ariadne-1 OS=Drosophila melanogaster GN=ari-1 PE=1 SV=2;>tr|A4V4Q7|A4V4Q7_DROME Ariadne, isoform C OS=Drosophila melanogaster GN=ari-1 PE=4 SV=1	0		Both	0	0	0	0	NA	NA	0	0	0	NA	NA	NA	N/A	N/A	N/A	N/A	N/A	5.18	0	NA	0	0	3	0	0	3					8.17883	8.2303					6.73169	6.78314	58.932	503;503	6.2301e-24	0
220	Q9Y1I2;A4V4S5;M9PF72	Vacuolar protein sorting-associated protein 33A	car	>sp|Q9Y1I2|VP33A_DROME Vacuolar protein sorting-associated protein 33A OS=Drosophila melanogaster GN=car PE=1 SV=1;>tr|A4V4S5|A4V4S5_DROME Carnation, isoform B OS=Drosophila melanogaster GN=car PE=4 SV=1;>tr|M9PF72|M9PF72_DROME Carnation, isoform C OS=Dros	0		Both	0	0	0	0	NA	NA	0	0	0	NA	NA	NA	N/A	N/A	N/A	N/A	N/A	6.28	0	NA	0	0	6	0	0	1					8.34723	7.29444					6.84207	5.78929	68.765	617;617;639	1.5935e-50	0
221	Q7KWG3;Q24246-4;Q24246-3;Q24246-10;Q24246-2;Q24246-9;Q24246-8;Q24246-6;Q24246-5;A4V4T4;Q24246-7;Q24246-12;Q24246;Q9W5W4;Q8IRZ3;M9NE47	Cytoplasmic dynein 1 intermediate chain	Sdic2;sw;Sdic1;Sdic3	>tr|Q7KWG3|Q7KWG3_DROME Sperm-specific dynein intermediate chain 2 OS=Drosophila melanogaster GN=Sdic2 PE=4 SV=1;>sp|Q24246-4|DYIN_DROME Isoform 1c of Cytoplasmic dynein 1 intermediate chain OS=Drosophila melanogaster GN=sw;>sp|Q24246-3|DYIN_DROME Isoform	0	254nm (YW) unique	Both	0	0.261494	0	0	NA	NA	0	1	0	0	0	0	0	0	0	0	0	5.26	0	NA	0	1	10	2	0	6	6.66313			8.11947	9.00221	8.38821	5.40785			6.26792	7.74694	7.13293	60.337	543;626;627;627;634;635;636;642;643;643;650;653;663;517;544;480	8.6432e-83	0
222	Q04499-2;A4V4U5;Q04499-5;M9NHG9;Q04499-3;M9NFJ2;Q04499;Q04499-4	Proline dehydrogenase 1, mitochondrial	slgA	>sp|Q04499-2|PROD_DROME Isoform A of Proline dehydrogenase 1, mitochondrial OS=Drosophila melanogaster GN=slgA;>tr|A4V4U5|A4V4U5_DROME Sluggish A, isoform F OS=Drosophila melanogaster GN=slgA PE=4 SV=1;>sp|Q04499-5|PROD_DROME Isoform E of Proline dehydroge	0		Both	0	0	0	0	NA	NA	0	0	0	NA	NA	NA	N/A	N/A	N/A	N/A	N/A	8.87	0	NA	0	0	13	0	0	5					8.84539	8.22412					7.21192	6.59065	75.951	669;669;681;681;669;669;681;356	5.7608e-49	0
223	Q8MRC7;Q9W5S7;Q9U4F5;A4V4V2;Q9TW27;Q9TW12		DIP1	>tr|Q8MRC7|Q8MRC7_DROME DISCO interacting protein 1, isoform E OS=Drosophila melanogaster GN=DIP1 PE=2 SV=1;>tr|Q9W5S7|Q9W5S7_DROME DISCO interacting protein 1, isoform F OS=Drosophila melanogaster GN=DIP1 PE=4 SV=3;>tr|Q9U4F5|Q9U4F5_DROME DISCO interactin	0	Both	254nm (YW) unique	X490 whole not available	33.4029	1	1	dsrm	1	1	0	1	0	0	0	0	0	0	0	0	6.04	0	NA	3	0	0	9	0	3		8.47453		10.2757		8.27974		6.92791		8.67596		7.43465	41.039	378;394;395;409;410;309	1.8808e-224	6.6
224	A5XCL5;Q9VSW2;E1JI91;Q9VSW1		UGP	>tr|A5XCL5|A5XCL5_DROME LD36265p (Fragment) OS=Drosophila melanogaster GN=UGP PE=2 SV=1;>tr|Q9VSW2|Q9VSW2_DROME RE14081p OS=Drosophila melanogaster GN=UGP PE=2 SV=2;>tr|E1JI91|E1JI91_DROME FI18837p1 OS=Drosophila melanogaster GN=UGP PE=2 SV=1;>tr|Q9VSW1|Q9	0	Both	Both	0.0229513	0.133398	0	0	NA	NA	0	0	0	0	0	0	1	0	0	1	0	6.94	0	NA	2	0	28	3	0	16		7.36682		8.5341	9.96912	9.06468		5.27987		6.43025	8.49199	7.58758	57.824	511;513;518;520	0	2.9
225	A8DQW8		clos	>tr|A8DQW8|A8DQW8_DROME CG42600 OS=Drosophila melanogaster GN=clos PE=4 SV=2	0		Both	0	0	0	0	NA	NA	0	0	0	NA	NA	NA	N/A	N/A	N/A	N/A	N/A	5.71	0	NA	0	4	13	0	0	19	7.55411				8.66423	9.06333	5.61962				6.72973	7.12885	201.1	1785	1.0724e-98	0
226	A8DY44;Q8I8U7	Transcription-associated protein 1	Nipped-A	>tr|A8DY44|A8DY44_DROME Nipped-A, isoform D OS=Drosophila melanogaster GN=Nipped-A PE=4 SV=1;>sp|Q8I8U7|TRA1_DROME Transcription-associated protein 1 OS=Drosophila melanogaster GN=Nipped-A PE=1 SV=3	0	365nm (X490) unique	Both	1.45401	0	0	0	NA	NA	0	0	1	0	0	0	0	0	0	0	0	7.85	0	no	5	1	34	0	6	3	6.3376	8.34155	7.14467		9.06138	7.68656	4.00719	5.32062	4.81426		6.73098	5.35614	435.36	3790;3803	1.9718e-130	1.5
227	A8DY49			>tr|A8DY49|A8DY49_DROME CG34215 OS=Drosophila melanogaster GN=CG34215 PE=4 SV=1	0		Both	0	0	0	0	NA	NA	0	0	0	NA	NA	NA	N/A	N/A	N/A	N/A	N/A	6.7	0	NA	0	0	2	0	0	3					7.87666	8.6201					7.17768	7.92113	11.193	104	1.1778e-11	0
228	A8DY69;Q8SXP0		Lpin	>tr|A8DY69|A8DY69_DROME CG8709, isoform B OS=Drosophila melanogaster GN=Lpin PE=2 SV=1;>tr|Q8SXP0|Q8SXP0_DROME CG8709, isoform A OS=Drosophila melanogaster GN=Lpin PE=2 SV=1	0		Both	0	0	0	0	NA	NA	0	0	1	NA	NA	NA	N/A	N/A	N/A	N/A	N/A	4.98	0	NA	0	0	6	0	0	1					8.13107	7.42408					6.4321	5.72512	114.83	1035;1089	2.5612e-16	0
229	Q7K304;A8DY77		Drep-2	>tr|Q7K304|Q7K304_DROME DNAation factor-related protein 2, isoform A OS=Drosophila melanogaster GN=Drep-2 PE=2 SV=1;>tr|A8DY77|A8DY77_DROME DNAation factor-related protein 2, isoform B OS=Drosophila melanogaster GN=Drep-2 PE=4 SV=1	0		Both	0	0	0	0	NA	NA	0	0	0	NA	NA	NA	N/A	N/A	N/A	N/A	N/A	5.26	0	NA	0	0	6	0	0	8					8.49044	8.31593					7.23515	7.06066	51.852	482;549	2.5736e-31	0
230	A8DY81;E2QCN4;A8DY80;A8DY82		Not1	>tr|A8DY81|A8DY81_DROME Not1, isoform C OS=Drosophila melanogaster GN=Not1 PE=1 SV=1;>tr|E2QCN4|E2QCN4_DROME Not1, isoform F OS=Drosophila melanogaster GN=Not1 PE=4 SV=1;>tr|A8DY80|A8DY80_DROME Not1, isoform D OS=Drosophila melanogaster GN=Not1 PE=4 SV=1;>	0	Both	Both	3.54933	17.8873	0	1	Not1	1	1	1	1	1	1	1	1	0	1	0	0	6.3	0	yes	19	11	53	45	39	21	7.84778	9.51413	8.81766	10.3738	9.74933	8.64185	5.77223	6.651	6.74211	7.53638	7.67378	6.56631	281.14	2505;2492;2503;2220	0	9.5
231	A8DYC5;A8DYC4		CG34439-RA	>tr|A8DYC5|A8DYC5_DROME CG34439, isoform A OS=Drosophila melanogaster GN=CG34439-RA PE=4 SV=1;>tr|A8DYC4|A8DYC4_DROME CG34439, isoform B OS=Drosophila melanogaster GN=CG34439 PE=4 SV=1	0		Both	0	0	0	0	NA	NA	0	0	0	NA	NA	NA	N/A	N/A	N/A	N/A	N/A	6.12	0	NA	0	0	2	0	0	2					8.40843	8.72236					7.80637	8.12031	8.5789	73;123	1.0974e-06	0
232	A8DYH2	Ubiquitin-fold modifier 1	CG34191	>sp|A8DYH2|UFM1_DROME Ubiquitin-fold modifier 1 OS=Drosophila melanogaster GN=CG34191 PE=3 SV=1	0		Both	0	0	0	0	NA	NA	0	0	0	NA	NA	NA	N/A	N/A	N/A	N/A	N/A	8.09	0	NA	0	0	4	0	0	4					8.97867	8.95755					8.37661	8.35549	9.4378	87	7.8391e-19	0
233	A8DYI1;Q7K556;A8DYI2		CG5544	>tr|A8DYI1|A8DYI1_DROME CG30118, isoform B OS=Drosophila melanogaster GN=CG30118 PE=4 SV=1;>tr|Q7K556|Q7K556_DROME CG30118, isoform A OS=Drosophila melanogaster GN=CG5544 PE=2 SV=1;>tr|A8DYI2|A8DYI2_DROME CG30118, isoform C OS=Drosophila melanogaster GN=CG	0	254nm (YW) unique	Both	0	1.98692	0	0	NA	NA	0	0	0	0	0	0	0	0	0	0	0	9.02	0	NA	0	0	14	4	1	3			6.60936	8.44075	8.90033	7.80515			5.178	6.3895	7.46897	6.37379	53.516	471;475;515	2.0568e-94	0
234	A8DYI6;Q0E924;A8DYI7		l(2)03709	>tr|A8DYI6|A8DYI6_DROME Lethal (2) 03709, isoform E OS=Drosophila melanogaster GN=l(2)03709 PE=4 SV=1;>tr|Q0E924|Q0E924_DROME LD46344p OS=Drosophila melanogaster GN=l(2)03709 PE=2 SV=2;>tr|A8DYI7|A8DYI7_DROME Lethal (2) 03709, isoform D OS=Drosophila melan	0		Both	0	9.31934e-05	0	0	NA	NA	0	0	0	NA	NA	NA	N/A	N/A	N/A	N/A	N/A	9.55	0	NA	0	0	17	1	2	19			7.82656	6.71257	10.5761	10.5327			6.42862	4.82166	9.17817	9.13475	37.28	338;299;303	0	0
235	Q11002;A8DYJ3;Q11002-2;Q9VFV0	Calpain-A;Calpain-A catalytic subunit	CalpA	>sp|Q11002|CANA_DROME Calpain-A OS=Drosophila melanogaster GN=CalpA PE=1 SV=2;>tr|A8DYJ3|A8DYJ3_DROME Calpain-A, isoform C OS=Drosophila melanogaster GN=CalpA PE=4 SV=1	0		Both	0	0	0	0	NA	NA	0	0	0	NA	NA	NA	N/A	N/A	N/A	N/A	N/A	4.85	0	NA	0	0	5	0	0	2					7.94543	7.46383					6.34337	5.86177	93.962	828;828;565;806	1.3733e-43	0
236	Q9W2K4;A8DYK5			>tr|Q9W2K4|Q9W2K4_DROME CG4266, isoform A OS=Drosophila melanogaster GN=CG4266 PE=2 SV=2;>tr|A8DYK5|A8DYK5_DROME CG4266, isoform B OS=Drosophila melanogaster GN=CG4266 PE=4 SV=1	0		Both	0	0	1	1	RRM_1	1	1	1	1	NA	NA	NA	N/A	N/A	N/A	N/A	N/A	8.31	0	NA	0	0	2	0	0	7					7.43069	8.30393					5.76793	6.64118	130.43	1215;1306	2.2529e-49	0
237	A8DYP4;Q9W0X5		CG2765-RC	>tr|A8DYP4|A8DYP4_DROME CG2765, isoform C OS=Drosophila melanogaster GN=CG2765-RC PE=2 SV=1;>tr|Q9W0X5|Q9W0X5_DROME CG2765, isoform A OS=Drosophila melanogaster GN=CG2765 PE=2 SV=1	0		254nm (YW) unique	NA	0	0	0	NA	NA	0	0	0	NA	NA	NA	N/A	N/A	N/A	N/A	N/A	4.92	0	NA	0	0	0	0	0	1						7.05748						6.15439	26.206	243;279	0.0003917	0
238	Q0E8U6;Q9VQ54;A8DYT1;M9NE65;Q0E8U7;M9PB01;M9PBP2		CG7337-RB;CG7337-RA	>tr|Q0E8U6|Q0E8U6_DROME CG7337, isoform B OS=Drosophila melanogaster GN=CG7337-RB PE=2 SV=1;>tr|Q9VQ54|Q9VQ54_DROME CG7337, isoform A OS=Drosophila melanogaster GN=CG7337-RA PE=2 SV=2;>tr|A8DYT1|A8DYT1_DROME CG7337, isoform D OS=Drosophila melanogaster GN=	0		Both	0	0	0	0	NA	NA	0	0	0	NA	NA	NA	N/A	N/A	N/A	N/A	N/A	8.04	0	NA	0	0	15	0	0	4					8.98736	9.18503					7.13001	7.32769	163.24	1504;1508;1539;1554;2347;2397;1476	3.8976e-54	0
239	A8DYT6			>tr|A8DYT6|A8DYT6_DROME CG15387 OS=Drosophila melanogaster GN=CG15387 PE=4 SV=1	0		Both	0	0	0	0	NA	NA	0	0	0	NA	NA	NA	N/A	N/A	N/A	N/A	N/A	6.73	0	NA	0	0	2	0	0	2					7.43419	7.74012					6.5311	6.83703	13.289	116	6.205e-07	0
240	A8DYU2;R9PY34;A8DYU1;A8DYU3;R9PY62;M9NE71			>tr|A8DYU2|A8DYU2_DROME CG34394, isoform A OS=Drosophila melanogaster GN=CG15411 PE=4 SV=1;>tr|R9PY34|R9PY34_DROME CG34394, isoform H OS=Drosophila melanogaster GN=CG15411 PE=4 SV=1;>tr|A8DYU1|A8DYU1_DROME CG34394, isoform D OS=Drosophila melanogaster GN=C	0		365nm (X490) unique	0	NA	0	0	NA	NA	0	0	0	NA	NA	NA	N/A	N/A	N/A	N/A	N/A	8.39	0	NA	0	0	2	0	0	0					7.64818						6.00475		123.76	1138;1206;1212;1239;1249;804	5.4714e-08	0
241	A8DYW1;Q9VMC7		CG9545	>tr|A8DYW1|A8DYW1_DROME CG31638, isoform B OS=Drosophila melanogaster GN=CG31638 PE=4 SV=1;>tr|Q9VMC7|Q9VMC7_DROME CG31638, isoform A OS=Drosophila melanogaster GN=CG9545 PE=2 SV=3	0		254nm (YW) unique	NA	0	0	0	NA	NA	0	0	0	NA	NA	NA	N/A	N/A	N/A	N/A	N/A	5.55	0	NA	0	1	0	0	0	6	7.76988					8.13127	6.35491					6.7163	59.383	514;704	1.9913e-17	0
242	Q9VMA9;M9PB51;M9PEV6;M9PC63;A8DYW2;M9PCQ7;M9PCC2;M9PCB8			>tr|Q9VMA9|Q9VMA9_DROME AT18603p OS=Drosophila melanogaster GN=CG31635 PE=2 SV=2;>tr|M9PB51|M9PB51_DROME CG31635, isoform E OS=Drosophila melanogaster GN=CG31635 PE=4 SV=1;>tr|M9PEV6|M9PEV6_DROME CG31635, isoform D OS=Drosophila melanogaster GN=CG31635 PE=	0		254nm (YW) unique	NA	0	0	0	NA	NA	0	0	0	NA	NA	NA	N/A	N/A	N/A	N/A	N/A	5.05	0	NA	0	0	0	0	1	2			6.77817			7.42269			5.07059			5.71512	167.15	1585;1589;1604;1608;1782;1786;1801;1805	1.3222e-06	0
243	D5SHT8;B7Z029;M9PB53;Q9VM99;A8DYW5;Q8IPJ4	Sodium/hydrogen exchanger	Nhe3-RE;Nhe3	>tr|D5SHT8|D5SHT8_DROME Sodium/hydrogen exchanger OS=Drosophila melanogaster GN=Nhe3 PE=2 SV=1;>tr|B7Z029|B7Z029_DROME Sodium/hydrogen exchanger OS=Drosophila melanogaster GN=Nhe3 PE=3 SV=1;>tr|M9PB53|M9PB53_DROME Sodium/hydrogen exchanger OS=Drosophila me	0		365nm (X490) unique	0	NA	0	0	NA	NA	0	0	0	NA	NA	NA	N/A	N/A	N/A	N/A	N/A	6.03	0	NA	0	0	1	0	0	0					7.46796						6.12555		66.921	604;681;682;687;696;711	4.5404e-06	0
244	Q59DZ3;A8DZ02;Q9VJW9;A8DZ03		kuz	>tr|Q59DZ3|Q59DZ3_DROME Kuzbanian, isoform C OS=Drosophila melanogaster GN=kuz PE=4 SV=1;>tr|A8DZ02|A8DZ02_DROME Kuzbanian, isoform F OS=Drosophila melanogaster GN=kuz PE=4 SV=2;>tr|Q9VJW9|Q9VJW9_DROME Kuzbanian, isoform A OS=Drosophila melanogaster GN=kuz	0		Both	0	0	0	0	NA	NA	0	0	0	NA	NA	NA	N/A	N/A	N/A	N/A	N/A	8.54	0	NA	0	0	1	0	0	3					7.35753	7.65326					5.64997	5.94569	121.16	1090;1219;1238;1256	2.5613e-09	0
245	Q9VJI6;A8DZ09;M9PG25;M9PBC6			>tr|Q9VJI6|Q9VJI6_DROME CG17912, isoform A OS=Drosophila melanogaster GN=CG17912 PE=2 SV=2;>tr|A8DZ09|A8DZ09_DROME CG17912, isoform B OS=Drosophila melanogaster GN=CG17912 PE=4 SV=1;>tr|M9PG25|M9PG25_DROME CG17912, isoform E OS=Drosophila melanogaster GN=C	0		Both	0	0	0	0	NA	NA	0	0	0	NA	NA	NA	N/A	N/A	N/A	N/A	N/A	9.38	0	yes	0	0	2	0	0	2					7.97813	8.47362					6.97813	7.47362	38.403	357;562;568;622	4.9243e-15	0
246	P15278-2;Q8INX7;P15278;A8DZ14	Fasciclin-3	Fas3	>sp|P15278-2|FAS3_DROME Isoform B of Fasciclin-3 OS=Drosophila melanogaster GN=Fas3;>tr|Q8INX7|Q8INX7_DROME Fasciclin 3, isoform C OS=Drosophila melanogaster GN=Fas3 PE=4 SV=2;>sp|P15278|FAS3_DROME Fasciclin-3 OS=Drosophila melanogaster GN=Fas3 PE=2 SV=1;>	0		254nm (YW) unique	NA	0	0	0	NA	NA	0	0	0	NA	NA	NA	N/A	N/A	N/A	N/A	N/A	5.18	0	NA	0	0	0	0	0	3						8.71601						7.51188	44.182	401;475;508;577	8.5542e-09	0
247	C3KGL5;Q9VIN1;M9PGB1;A8DZ20;M9PBE8;A8DZ19		rtGEF	>tr|C3KGL5|C3KGL5_DROME GH28580p OS=Drosophila melanogaster GN=RtGEF PE=2 SV=1;>tr|Q9VIN1|Q9VIN1_DROME Rho-type guanine exchange factor, isoform A OS=Drosophila melanogaster GN=RtGEF PE=4 SV=1;>tr|M9PGB1|M9PGB1_DROME Rho-type guanine exchange factor, isofo	0		Both	0	0	0	0	NA	NA	0	0	0	NA	NA	NA	N/A	N/A	N/A	N/A	N/A	6.75	0	NA	0	0	2	0	0	1					7.26956	7.32021					5.79243	5.84309	69.118	635;687;923;973;1198;1310	0.00030549	0
248	O61380;A8DZ29		eIF4G	>tr|O61380|O61380_DROME Eukaryotic translation initiation factor 4G, isoform A OS=Drosophila melanogaster GN=eIF4G PE=2 SV=3;>tr|A8DZ29|A8DZ29_DROME Eukaryotic translation initiation factor 4G, isoform B OS=Drosophila melanogaster GN=eIF4G PE=4 SV=1	0	Both	Both	4.66259	2.72156	1	1	MA3;MIF4G	1;1	1	1	1	1	1	1	1	0	1	1	1	7.8	0	NA	30	16	59	67	45	60	8.29957	10.258	9.1962	11.2681	10.3131	10.2882	6.39108	7.50035	7.28771	8.5321	8.40465	8.37976	183.94	1666;1919	0	23.6
249	Q9VNR7;A8E6R2			>tr|Q9VNR7|Q9VNR7_DROME CG11241, isoform A OS=Drosophila melanogaster GN=CG11241 PE=2 SV=3;>tr|A8E6R2|A8E6R2_DROME CG11241, isoform B OS=Drosophila melanogaster GN=CG11241 PE=2 SV=1	0		365nm (X490) unique	0	NA	0	0	NA	NA	0	0	0	NA	NA	NA	N/A	N/A	N/A	N/A	N/A	8.56	0	NA	0	0	3	0	0	0					8.15116						6.71979		55.845	508;518	6.4772e-10	0
250	A8E6W0		CG34039-RA	>tr|A8E6W0|A8E6W0_DROME CG34039 OS=Drosophila melanogaster GN=CG34039-RA PE=2 SV=1	0		Both	NA	0	0	0	NA	NA	0	0	0	NA	NA	NA	N/A	N/A	N/A	N/A	N/A	5.48	0	NA	0	0	1	0	0	4						8.2718						7.2718	22.053	198	5.1318e-11	0
251	Q9VMX0;A8E702	39S ribosomal protein L28, mitochondrial	mRpL28	>sp|Q9VMX0|RM28_DROME 39S ribosomal protein L28, mitochondrial OS=Drosophila melanogaster GN=mRpL28 PE=1 SV=1;>tr|A8E702|A8E702_DROME IP19992p OS=Drosophila melanogaster GN=mRpL28 PE=2 SV=1	0	254nm (YW) unique	Both	0	0.855956	0	0	NA	NA	0	1	1	1	0	0	0	0	0	0	0	9.04	1	no	0	1	11	10	0	12	6.70587			9.37057	8.94493	9.03242	5.52978			7.50632	7.76884	7.85634	34.95	302;302	1.1434e-119	0
252	Q9VZQ3;Q7KV69;Q7KV70;M9PBL6;A8JNJ6		kst	>tr|Q9VZQ3|Q9VZQ3_DROME Karst, isoform A OS=Drosophila melanogaster GN=kst PE=4 SV=1;>tr|Q7KV69|Q7KV69_DROME Karst, isoform B OS=Drosophila melanogaster GN=kst PE=4 SV=1;>tr|Q7KV70|Q7KV70_DROME Karst, isoform C OS=Drosophila melanogaster GN=kst PE=4 SV=1;>	0		Both	0.124162	4.78813	0	0	NA	NA	0	0	0	NA	NA	NA	N/A	N/A	N/A	N/A	N/A	5.94	0	NA	1	1	39	1	0	2		7.20715		8.19725	9.08948	7.19756		4.25071		5.23543	6.72965	4.83773	471.63	4097;4118;4207;4321;4337	6.6379e-126	0.3
253	M9MRV3;D4G7A5;M9PE70;Q9VZN2;E0R7R0;A8JNJ8;Q9VZM9;Q7YU16;Q9VZN0		CG32264-RB;CG12604;CG32264-RE;CG10860	>tr|M9MRV3|M9MRV3_DROME CG32264, isoform G OS=Drosophila melanogaster GN=CG32264 PE=4 SV=1;>tr|D4G7A5|D4G7A5_DROME CG32264, isoform J OS=Drosophila melanogaster GN=CG32264-RB PE=2 SV=1;>tr|M9PE70|M9PE70_DROME CG32264, isoform L OS=Drosophila melanogaster G	0		Both	0	0	0	0	NA	NA	0	0	0	NA	NA	NA	N/A	N/A	N/A	N/A	N/A	6.53	0	NA	0	0	1	0	0	1					7.58852	7.95227					6.38441	6.74816	51.282	464;509;759;790;822;927;937;998;1008	6.3614e-05	0
254	Q8MSX1-2;M9PBM2;Q8MSX1;M9PE05;A8JNJ9	Protein encore	enc	>sp|Q8MSX1-2|ENC_DROME Isoform 2 of Protein encore OS=Drosophila melanogaster GN=enc;>tr|M9PBM2|M9PBM2_DROME Encore, isoform G OS=Drosophila melanogaster GN=enc PE=4 SV=1;>sp|Q8MSX1|ENC_DROME Protein encore OS=Drosophila melanogaster GN=enc PE=1 SV=2;>tr|M	0			NA	YW whole not available	0	1	R3H	1	1	1	1	NA	NA	NA	N/A	N/A	N/A	N/A	N/A	8.82	0	NA	0	0	0	1	0	0				8.87573						6.64413			177.47	1692;1798;1818;1827;1937	0	1.5
255	F2FB68;Q9VZI0;Q9I7T2;Q8IRC0;M9PEK8;M9PBN6;Q8IRB9;M9PE93;M9PHB1;A8JNK1;Q8IRC1		ens-RA;ens	>tr|F2FB68|F2FB68_DROME Ensconsin, isoform H OS=Drosophila melanogaster GN=ens PE=2 SV=1;>tr|Q9VZI0|Q9VZI0_DROME Ensconsin, isoform B OS=Drosophila melanogaster GN=ens PE=4 SV=3;>tr|Q9I7T2|Q9I7T2_DROME Ensconsin, isoform A OS=Drosophila melanogaster GN=ens	0		Both	0	0	0	0	NA	NA	0	0	0	NA	NA	NA	N/A	N/A	N/A	N/A	N/A	6.18	0	NA	0	0	12	0	0	15					9.02173	9.38417					7.53037	7.89282	93.786	848;851;887;898;933;968;983;1015;1100;1241;833	2.5038e-175	0
256	M9PBP3;M9PE52;M9NE16;M9NF07;M9NF10;M9NDH6;Q9VZD7;M9ND42;M9ND44;A8JNK4		Cip4	>tr|M9PBP3|M9PBP3_DROME Cip4, isoform J OS=Drosophila melanogaster GN=Cip4 PE=4 SV=1;>tr|M9PE52|M9PE52_DROME Cip4, isoform K OS=Drosophila melanogaster GN=Cip4 PE=4 SV=1;>tr|M9NE16|M9NE16_DROME Cip4, isoform C OS=Drosophila melanogaster GN=Cip4 PE=4 SV=1;>	0		254nm (YW) unique	NA	0	0	0	NA	NA	0	0	0	NA	NA	NA	N/A	N/A	N/A	N/A	N/A	5.35	0	NA	0	0	0	0	0	1						8.13085						6.69949	67.252	602;611;612;623;624;628;631;644;646;665	3.0502e-06	0
257	M9PEM7;M9PBU6;A8JNM3;Q7KU93;M9PEF2;Q7KU90;Q9VS85		lqf	>tr|M9PEM7|M9PEM7_DROME Liquid facets, isoform G OS=Drosophila melanogaster GN=lqf PE=4 SV=1;>tr|M9PBU6|M9PBU6_DROME Liquid facets, isoform I OS=Drosophila melanogaster GN=lqf PE=4 SV=1;>tr|A8JNM3|A8JNM3_DROME Liquid facets, isoform F OS=Drosophila melanog	0		Both	0	0.0105582	0	0	NA	NA	0	0	0	NA	NA	NA	N/A	N/A	N/A	N/A	N/A	5.28	0	NA	0	0	13	1	0	16				7.51132	9.04332	9.21859				5.61727	7.70089	7.87615	67.314	630;637;640;784;791;824;831	4.9166e-79	0
258	Q9VSI2;A8JNN5		GapcenA	>tr|Q9VSI2|Q9VSI2_DROME GapcenA, isoform A OS=Drosophila melanogaster GN=GAPcenA PE=4 SV=2;>tr|A8JNN5|A8JNN5_DROME GapcenA, isoform B OS=Drosophila melanogaster GN=GAPcenA PE=4 SV=1	0		365nm (X490) unique	0	NA	0	0	NA	NA	0	0	0	NA	NA	NA	N/A	N/A	N/A	N/A	N/A	5.7	0	NA	0	0	3	0	0	0					7.79697						6.1949		113.29	1005;1194	2.0254e-08	0
259	Q9V3C7;A8JNP7		I-2	>tr|Q9V3C7|Q9V3C7_DROME Inhibitor-2 OS=Drosophila melanogaster GN=I-2 PE=2 SV=1;>tr|A8JNP7|A8JNP7_DROME Inhibitor-2, isoform B OS=Drosophila melanogaster GN=I-2 PE=4 SV=1	0		Both	0	0	0	0	NA	NA	0	0	0	NA	NA	NA	N/A	N/A	N/A	N/A	N/A	4.82	0	NA	0	0	2	0	0	3					8.37438	9.17009					7.42014	8.21585	22.968	205;310	3.517e-37	0
260	A8JNQ0;A8JNQ1;B7Z0G0;Q9VT70	Nuclear distribution protein nudE homolog	nudE	>tr|A8JNQ0|A8JNQ0_DROME NudE, isoform B OS=Drosophila melanogaster GN=nudE PE=4 SV=1;>tr|A8JNQ1|A8JNQ1_DROME NudE, isoform C OS=Drosophila melanogaster GN=nudE PE=4 SV=1;>tr|B7Z0G0|B7Z0G0_DROME NudE, isoform D OS=Drosophila melanogaster GN=nudE PE=4 SV=1;>	0		Both	0	0	0	0	NA	NA	0	0	0	NA	NA	NA	N/A	N/A	N/A	N/A	N/A	5.31	0	NA	0	0	2	0	0	4					7.94428	8.24524					6.76819	7.06915	37.685	328;377;283;317	1.2599e-09	0
261	M9PF74;A8JNQ5;A8JNQ4;M9ND74;Q7YU08;Q9VT99;Q9VT98;M9NFQ7		A2bp1	>tr|M9PF74|M9PF74_DROME Ataxin-2 binding protein 1, isoform M OS=Drosophila melanogaster GN=A2bp1 PE=4 SV=1;>tr|A8JNQ5|A8JNQ5_DROME Ataxin-2 binding protein 1, isoform F OS=Drosophila melanogaster GN=A2bp1 PE=4 SV=1;>tr|A8JNQ4|A8JNQ4_DROME Ataxin-2 binding	0	254nm (YW) unique		NA	YW whole not available	1	1	RRM_1	1	1	1	1	1	1	1	0	0	1	0	0	8.81	0	NA	0	0	0	4	0	0				9.14164						7.35635			54.31	547;763;796;858;865;889;921;962	1.4509e-18	0
262	A8JNT7		l(3)72Do	>tr|A8JNT7|A8JNT7_DROME Lethal (3) 72Do OS=Drosophila melanogaster GN=Hsc20 PE=2 SV=1	0		Both	0	0	0	0	NA	NA	0	0	0	NA	NA	NA	N/A	N/A	N/A	N/A	N/A	6.76	0	NA	0	0	2	0	0	4					7.73926	8.22157					6.53513	7.01745	27.551	240	2.9232e-10	0
263	M9PCU1;M9PI83;M9PFX0;M9PFI5;P00522;A8JNU2;M9PFI8;M9PCT8;M9PFS1	Tyrosine-protein kinase Abl	Abl	>tr|M9PCU1|M9PCU1_DROME Abl tyrosine kinase, isoform H OS=Drosophila melanogaster GN=Abl PE=4 SV=1;>tr|M9PI83|M9PI83_DROME Abl tyrosine kinase, isoform G OS=Drosophila melanogaster GN=Abl PE=4 SV=1;>tr|M9PFX0|M9PFX0_DROME Abl tyrosine kinase, isoform E OS=	0		Both	0	0	0	0	NA	NA	0	0	0	NA	NA	NA	N/A	N/A	N/A	N/A	N/A	6.9	0	NA	0	0	4	0	0	2					7.84474	7.85881					6.10438	6.11846	159.58	1504;1522;1589;1607;1620;1638;1666;1705;1723	1.0272e-19	0
264	Q9VVC5;Q8IQQ0;A8JNU6		Nc73EF	>tr|Q9VVC5|Q9VVC5_DROME Neural conserved at 73EF, isoform A OS=Drosophila melanogaster GN=Nc73EF PE=2 SV=2;>tr|Q8IQQ0|Q8IQQ0_DROME Neural conserved at 73EF, isoform F OS=Drosophila melanogaster GN=Nc73EF PE=2 SV=1;>tr|A8JNU6|A8JNU6_DROME Neural conserved a	0	Both	Both	0.176337	1.68909	0	0	NA	NA	0	0	0	0	0	0	1	1	0	0	0	6.41	0	NA	4	2	38	5	0	4	7.03547	8.28175		8.7694	9.92277	8.18018	5.31946	5.88019		6.40936	8.20677	6.46418	112.58	1008;1017;1105	0	5.2
265	M9PD50;Q7KTX8;A8JNW4	Mediator of RNA polymerase II transcription subunit 13	skd	>tr|M9PD50|M9PD50_DROME Skuld, isoform F OS=Drosophila melanogaster GN=skd PE=4 SV=1;>sp|Q7KTX8|MED13_DROME Mediator of RNA polymerase II transcription subunit 13 OS=Drosophila melanogaster GN=skd PE=1 SV=1;>tr|A8JNW4|A8JNW4_DROME Skuld, isoform E OS=Droso	0		365nm (X490) unique	0	NA	0	0	NA	NA	0	0	1	NA	NA	NA	N/A	N/A	N/A	N/A	N/A	6.08	0	no	0	0	5	0	0	0					7.86635						5.91696		278.2	2601;2618;2768	2.1263e-45	0
266	A8JNW5			>tr|A8JNW5|A8JNW5_DROME CG34261 OS=Drosophila melanogaster GN=CG34261 PE=4 SV=1	0	254nm (YW) unique	Both	1.6885	5.03821	0	0	NA	NA	0	0	0	0	0	0	0	0	0	0	0	9.59	0	NA	1	0	5	3	0	2		7.80154		8.86158	8.50116	7.791		6.15573		7.2108	7.50116	6.791	16.946	148	1.8957e-20	8.1
267	M9PGG0;M9PG88;M9PIL3;Q9VNS2;A8JNX0		ArfGAP3	>tr|M9PGG0|M9PGG0_DROME ADP-ribosylation factor GTPase activating protein 3, isoform E OS=Drosophila melanogaster GN=ArfGAP3 PE=4 SV=1;>tr|M9PG88|M9PG88_DROME ADP-ribosylation factor GTPase activating protein 3, isoform F OS=Drosophila melanogaster GN=ArfG	0		Both	0	0	0	0	NA	NA	0	0	0	NA	NA	NA	N/A	N/A	N/A	N/A	N/A	9.06	0	NA	0	0	14	0	0	9					8.97837	9.27582					7.58042	7.87789	54.454	513;514;549;552;553	1.3539e-181	0
268	A8JPX0;E1JJ00			>tr|A8JPX0|A8JPX0_DROME CG34354, isoform A OS=Drosophila melanogaster GN=CG12425 PE=4 SV=1;>tr|E1JJ00|E1JJ00_DROME CG34354, isoform B OS=Drosophila melanogaster GN=CG12425 PE=4 SV=1	0	254nm (YW) unique		NA	YW whole not available	1	1	RRM_1	2	1	1	1	1	1	1	1	0	1	1	1	6.4	0	NA	0	0	0	4	0	0				9.08179						7.56974			57.741	525;427	7.4331e-126	0
269	A8JQU3		Gasp	>tr|A8JQU3|A8JQU3_DROME Gasp, isoform B OS=Drosophila melanogaster GN=Gasp PE=4 SV=1	0			NA	YW whole not available	0	0	NA	NA	0	0	0	NA	NA	NA	N/A	N/A	N/A	N/A	N/A	4.58	0	NA	0	0	0	1	0	0				7.23364						5.52633			26.094	235	1.2506e-46	0
270	Q9VHC4;Q8INN8;A8JQW1;Q6AWD5			>tr|Q9VHC4|Q9VHC4_DROME CG8176, isoform B OS=Drosophila melanogaster GN=CG8176 PE=4 SV=2;>tr|Q8INN8|Q8INN8_DROME CG8176, isoform A OS=Drosophila melanogaster GN=CG8176 PE=4 SV=1;>tr|A8JQW1|A8JQW1_DROME CG8176, isoform D OS=Drosophila melanogaster GN=CG8176	0		Both	0	0.479017	0	0	NA	NA	0	0	0	NA	NA	NA	N/A	N/A	N/A	N/A	N/A	8.47	0	NA	0	0	1	1	0	4				8.0019	7.51222	8.01636				5.78078	5.87875	6.3829	118.73	1112;1133;1199;1220	2.9739e-10	0
271	Q9VH84;A8JQW3		Pnn	>tr|Q9VH84|Q9VH84_DROME Pinin, isoform A OS=Drosophila melanogaster GN=Pnn PE=2 SV=1;>tr|A8JQW3|A8JQW3_DROME Pinin, isoform B OS=Drosophila melanogaster GN=Pnn PE=4 SV=1	0		Both	0	0.085885	0	0	NA	NA	0	1	1	NA	NA	NA	N/A	N/A	N/A	N/A	N/A	9.47	0	NA	0	0	3	1	0	3				7.30924	7.61739	8.121				5.62633	6.47126	6.97488	35.907	303;307	1.1596e-12	0
272	Q3ZAP4;Q8MTZ6;A8JQX3		cu	>tr|Q3ZAP4|Q3ZAP4_DROME IP15605p OS=Drosophila melanogaster GN=cu PE=2 SV=1;>tr|Q8MTZ6|Q8MTZ6_DROME Nocturin OS=Drosophila melanogaster GN=cu PE=2 SV=1;>tr|A8JQX3|A8JQX3_DROME Nocturnin, isoform D OS=Drosophila melanogaster GN=cu PE=4 SV=1	0		Both	0	0	0	1	Exo_endo_phos	1	1	1	1	NA	NA	NA	N/A	N/A	N/A	N/A	N/A	5.68	0	NA	0	0	4	0	0	1					7.96326	7.22943					6.62084	5.887	49.952	446;449;642	1.8515e-19	0
273	Q8INJ4;Q9VGF8;A8JQY2		CG12213-RB	>tr|Q8INJ4|Q8INJ4_DROME CG12213, isoform B OS=Drosophila melanogaster GN=CG12213-RB PE=2 SV=2;>tr|Q9VGF8|Q9VGF8_DROME CG12213, isoform A OS=Drosophila melanogaster GN=CG12213 PE=4 SV=2;>tr|A8JQY2|A8JQY2_DROME CG12213, isoform C OS=Drosophila melanogaster G	0		Both	0	0	0	0	NA	NA	0	0	0	NA	NA	NA	N/A	N/A	N/A	N/A	N/A	5.04	0	NA	0	0	6	0	0	9					8.03205	8.75066					6.63412	7.35272	56.076	514;573;581	1.7291e-126	0
274	A8JR14-2;A8JR14	Aprataxin and PNK-like factor	CG6171	>sp|A8JR14-2|APLF_DROME Isoform A of Aprataxin and PNK-like factor OS=Drosophila melanogaster GN=CG6171;>sp|A8JR14|APLF_DROME Aprataxin and PNK-like factor OS=Drosophila melanogaster GN=CG6171 PE=1 SV=1	0		254nm (YW) unique	NA	0	0	0	NA	NA	0	0	1	NA	NA	NA	N/A	N/A	N/A	N/A	N/A	4.67	0	NA	0	0	0	0	0	1						7.38863						6.38863	20.158	187;255	4.5497e-05	0
275	B7Z0L1;Q9VES3;P10674;Q8INA9;A8JR25;B7Z0L0	Fasciclin-1	Fas1	>tr|B7Z0L1|B7Z0L1_DROME Fasciclin 1, isoform E OS=Drosophila melanogaster GN=Fas1 PE=4 SV=1;>tr|Q9VES3|Q9VES3_DROME FI05280p OS=Drosophila melanogaster GN=Fas1 PE=2 SV=2;>sp|P10674|FAS1_DROME Fasciclin-1 OS=Drosophila melanogaster GN=Fas1 PE=1 SV=1;>tr|Q8I	0		Both	0	0	0	0	NA	NA	0	0	0	NA	NA	NA	N/A	N/A	N/A	N/A	N/A	6.43	0	NA	0	0	15	0	0	18					8.92573	9.46					7.40722	7.94148	69.486	624;649;652;655;662;636	2.0262e-190	0
276	O77237;A8JR89	Protein pellino	Pli	>sp|O77237|PELI_DROME Protein pellino OS=Drosophila melanogaster GN=Pli PE=1 SV=1;>tr|A8JR89|A8JR89_DROME Pellino, isoform B OS=Drosophila melanogaster GN=Pli PE=4 SV=1	0		365nm (X490) unique	0	NA	0	0	NA	NA	0	0	0	NA	NA	NA	N/A	N/A	N/A	N/A	N/A	6.64	0	NA	0	0	1	0	0	0					7.38737						6.1086		46.77	424;424	0.00088699	0
277	A8JRA4;Q8IMU5;Q9VBZ5		CG6422-RB	>tr|A8JRA4|A8JRA4_DROME CG6422, isoform C OS=Drosophila melanogaster GN=CG6422 PE=4 SV=1;>tr|Q8IMU5|Q8IMU5_DROME CG6422, isoform B OS=Drosophila melanogaster GN=CG6422-RB PE=2 SV=1;>tr|Q9VBZ5|Q9VBZ5_DROME CG6422, isoform A OS=Drosophila melanogaster GN=CG6	1	Both	Both	28.7412	150.037	0	1	YTH	1	1	1	0	1	1	1	0	0	1	0	0	9.06	0	NA	3	1	6	19	0	2	6.86413	8.54082		10.3378	7.94823	7.6849	5.32006	6.28974		8.03455	6.40417	6.14082	78.298	694;699;700	0	5.5
278	A8JRB1		CHKov1	>tr|A8JRB1|A8JRB1_DROME CHKov1, isoform F OS=Drosophila melanogaster GN=CHKov1 PE=4 SV=1	0	254nm (YW) unique		NA	YW whole not available	0	0	NA	NA	0	0	0	0	0	0	0	0	0	0	0	9.62	0	NA	0	0	0	2	0	0				8.37209						6.41484			44.105	397	1.4608e-24	0
279	Q9VBN2;A8JRC4;A8JRC7;Q7YU01;Q86B77;Q7YTZ6;A8JRD1;Q9VBN1;A8JRD2;E1JIX9;Q6NP71;Q9VBN0;A8JRD0;Q6NN57		LpR2	>tr|Q9VBN2|Q9VBN2_DROME LpR2, isoform A OS=Drosophila melanogaster GN=LpR2 PE=4 SV=4;>tr|A8JRC4|A8JRC4_DROME LpR2, isoform C OS=Drosophila melanogaster GN=LpR2 PE=4 SV=1;>tr|A8JRC7|A8JRC7_DROME LpR2, isoform G OS=Drosophila melanogaster GN=LpR2 PE=4 SV=1;>	0		Both	0	0	0	0	NA	NA	0	0	0	NA	NA	NA	N/A	N/A	N/A	N/A	N/A	5.14	0	NA	0	0	3	0	0	4					7.84663	8.10226					6.12235	6.378	113.16	1028;1029;1063;1064;826;861;830;889;928;978;996;1037;1076;380	5.0849e-15	0
280	Q9VB55;A8JRE3		woc	>tr|Q9VB55|Q9VB55_DROME Without children, isoform A OS=Drosophila melanogaster GN=woc PE=4 SV=2;>tr|A8JRE3|A8JRE3_DROME Without children, isoform B OS=Drosophila melanogaster GN=woc PE=4 SV=1	0	254nm (YW) unique	Both	1.08833	1.48869	0	0	NA	NA	0	0	1	0	0	0	0	0	0	0	0	4.64	0	NA	1	2	16	5	1	5	6.81844	7.73684	5.85463	8.51512	8.63255	7.99944	4.9796	5.25753	4.01578	6.05092	6.7937	6.16059	187.39	1688;1703	2.8736e-57	0.5
281	O46231;E1JJ21;Q9VA56;Q9VA58;Q9VA59;A8JRH3		tmod	>tr|O46231|O46231_DROME FI18705p1 OS=Drosophila melanogaster GN=tmod PE=2 SV=1;>tr|E1JJ21|E1JJ21_DROME Tropomodulin, isoform H OS=Drosophila melanogaster GN=tmod PE=4 SV=1;>tr|Q9VA56|Q9VA56_DROME GH23271p OS=Drosophila melanogaster GN=tmod PE=2 SV=2;>tr|Q9	0		254nm (YW) unique	NA	0	0	0	NA	NA	0	0	0	NA	NA	NA	N/A	N/A	N/A	N/A	N/A	5.07	0	NA	0	0	0	0	0	2						7.84397						6.54294	41.435	367;372;403;409;439;526	1.5564e-09	0
282	A8JRH9;Q9V9X7		CG11337-RD	>tr|A8JRH9|A8JRH9_DROME CG11337, isoform C OS=Drosophila melanogaster GN=CG11337 PE=4 SV=1;>tr|Q9V9X7|Q9V9X7_DROME CG11337, isoform A OS=Drosophila melanogaster GN=CG11337-RD PE=2 SV=2	0	254nm (YW) unique	Both	0	34.6212	1	1	RNase_PH;PNPase;RNase_PH_C	2;1;1	1	1	1	0	1	0	0	0	0	0	0	7.57	0	NA	0	0	10	15	0	2				9.75561	8.5392	7.78234				7.471	6.97101	6.21413	79.776	721;771	3.7459e-119	0
283	Q9W5G0;A8JUS8			>tr|Q9W5G0|Q9W5G0_DROME CG13373, isoform A OS=Drosophila melanogaster GN=CG13373 PE=2 SV=1;>tr|A8JUS8|A8JUS8_DROME CG13373, isoform B OS=Drosophila melanogaster GN=CG13373 PE=4 SV=1	0		Both	0	0	0	0	NA	NA	0	0	0	NA	NA	NA	N/A	N/A	N/A	N/A	N/A	5.15	0	NA	0	0	2	0	0	1					7.84093	9.45942					6.99584	8.61432	14.034	124;177	5.1524e-05	0
284	A8JUU1;M9PHF1;A8JUU3		Sec16	>tr|A8JUU1|A8JUU1_DROME Sec16, isoform E OS=Drosophila melanogaster GN=Sec16 PE=4 SV=1;>tr|M9PHF1|M9PHF1_DROME Sec16, isoform F OS=Drosophila melanogaster GN=Sec16 PE=4 SV=1;>tr|A8JUU3|A8JUU3_DROME Sec16, isoform D OS=Drosophila melanogaster GN=Sec16 PE=4	0	254nm (YW) unique	Both	0.138741	0.112939	0	0	NA	NA	0	0	0	0	0	0	0	0	0	0	0	5.47	0	NA	1	1	15	2	0	15	6.51103	7.13078		8.32502	8.97122	8.94328	4.77864	4.8081		5.98125	7.23882	7.21088	220.18	2021;2250;2221	1.4765e-134	0.6
285	A8JUV0-3;A8JUV0-4;A8JUV0;A8JUV0-2	Protein strawberry notch	sno	>sp|A8JUV0-3|SBNO_DROME Isoform B of Protein strawberry notch OS=Drosophila melanogaster GN=sno;>sp|A8JUV0-4|SBNO_DROME Isoform C of Protein strawberry notch OS=Drosophila melanogaster GN=sno;>sp|A8JUV0|SBNO_DROME Protein strawberry notch OS=Drosophila mel	0		Both	0	0	0	0	NA	NA	0	0	1	NA	NA	NA	N/A	N/A	N/A	N/A	N/A	8.3	0	no	0	0	7	0	0	2					7.97496	7.68508					6.07188	5.78199	170.33	1547;1653;1833;191	1.2294e-42	0
286	A8JUV4		Vml	>tr|A8JUV4|A8JUV4_DROME Vitelline membrane-like OS=Drosophila melanogaster GN=Vml PE=4 SV=1	0		Both	0	0	0	0	NA	NA	0	0	0	NA	NA	NA	N/A	N/A	N/A	N/A	N/A	7.99	0	NA	0	0	1	0	0	1					8.15458	8.20175					7.3095	7.35666	56.116	578	1.7029e-06	0
287	Q9W4D2;A8JUY0;Q9W4D2-2;A8JUY2	RNA-binding protein 4F	Rnp4F	>sp|Q9W4D2|RNP4F_DROME RNA-binding protein 4F OS=Drosophila melanogaster GN=Rnp4F PE=1 SV=1;>tr|A8JUY0|A8JUY0_DROME RNA-binding protein 4F, isoform D OS=Drosophila melanogaster GN=Rnp4F PE=4 SV=1;>sp|Q9W4D2-2|RNP4F_DROME Isoform B of RNA-binding protein 4F	0	Both	Both	2.45998	3.45419	1	1	Lsm_interact;RRM_1	1;1	1	1	1	1	1	1	1	0	1	1	1	5.02	0	NA	3	0	13	11	0	8		8.20085		9.53394	8.70397	8.57791		5.91992		7.23172	7.10192	6.97585	106.74	941;941;639;555	1.2969e-73	4.3
288	A8JUY3	DNA-directed RNA polymerase		>tr|A8JUY3|A8JUY3_DROME DNA-directed RNA polymerase OS=Drosophila melanogaster GN=CG17209 PE=3 SV=2	0		365nm (X490) unique	0	YW whole not available	0	1	RNA_pol_Rpb1_1;RNA_pol_Rpb1_2;RNA_pol_Rpb1_3;RNA_pol_Rpb1_4;RNA_pol_Rpb1_5	1;1;1;1;1	1	0	1	NA	NA	NA	N/A	N/A	N/A	N/A	N/A	8.86	0	maybe	0	0	4	1	0	0				7.93318	7.85041					5.45295	5.95278		154.63	1383	4.5958e-10	0
289	A8JV04;Q7YU03			>tr|A8JV04|A8JV04_DROME CG3632, isoform F OS=Drosophila melanogaster GN=CG3632 PE=4 SV=1;>tr|Q7YU03|Q7YU03_DROME CG3632, isoform E OS=Drosophila melanogaster GN=CG3632 PE=2 SV=1	0		Both	0	0	0	0	NA	NA	0	0	0	NA	NA	NA	N/A	N/A	N/A	N/A	N/A	5.65	0	NA	0	0	2	0	0	3					7.20325	7.49665					5.37718	5.67058	137.54	1241;1250	1.1001e-09	0
290	A8JV07			>tr|A8JV07|A8JV07_DROME CG9915, isoform B OS=Drosophila melanogaster GN=CG9915 PE=4 SV=1	0		Both	0	0	0	0	NA	NA	0	0	1	NA	NA	NA	N/A	N/A	N/A	N/A	N/A	11.92	0	NA	0	1	4	0	0	3	7.13296				8.08803	8.63338	5.62782				6.58287	7.12824	90.575	820	2.0597e-18	0
291	Q9W3W1;A8JV09;D6W4T8	Coronin	pod1;pod1-RC	>tr|Q9W3W1|Q9W3W1_DROME Coronin OS=Drosophila melanogaster GN=pod1 PE=2 SV=1;>tr|A8JV09|A8JV09_DROME Coronin OS=Drosophila melanogaster GN=pod1 PE=3 SV=1;>tr|D6W4T8|D6W4T8_DROME Coronin OS=Drosophila melanogaster GN=pod1 PE=2 SV=1	0		365nm (X490) unique	0	NA	0	0	NA	NA	0	0	0	NA	NA	NA	N/A	N/A	N/A	N/A	N/A	6.31	0	NA	0	0	14	0	1	0			10.0036		8.67404				8.25544		6.92585		119.35	1074;1255;1266	2.5181e-50	0
292	Q9VXE6;A8JV18	Nuclear pore complex protein Nup153	Nup153	>sp|Q9VXE6|NU153_DROME Nuclear pore complex protein Nup153 OS=Drosophila melanogaster GN=Nup153 PE=1 SV=4;>tr|A8JV18|A8JV18_DROME Nucleoporin 153, isoform B OS=Drosophila melanogaster GN=Nup153 PE=4 SV=1	0		Both	0	0	0	1	zf.RanBP	5	1	1	1	NA	NA	NA	N/A	N/A	N/A	N/A	N/A	8.45	0	NA	0	0	24	0	0	24					9.18173	9.33395					7.34922	7.50144	196.58	1883;1929	4.1776e-211	0
293	Q9W3F6;A8JV22;A8JV24		CG1440-RC	>tr|Q9W3F6|Q9W3F6_DROME CG1440, isoform A OS=Drosophila melanogaster GN=CG1440 PE=2 SV=2;>tr|A8JV22|A8JV22_DROME AT08049p OS=Drosophila melanogaster GN=CG1440-RC PE=2 SV=1;>tr|A8JV24|A8JV24_DROME CG1440, isoform B OS=Drosophila melanogaster GN=CG1440 PE=4	0		Both	0	0.0116958	0	0	NA	NA	0	0	0	NA	NA	NA	N/A	N/A	N/A	N/A	N/A	5.74	0	NA	0	0	23	1	0	18				7.89687	10.1494	9.53136				5.86978	8.70222	8.08422	55.156	488;511;368	0	0
294	A8JV36;Q7KVS9		Trf4-1	>tr|A8JV36|A8JV36_DROME Trf4-1, isoform F OS=Drosophila melanogaster GN=Trf4-1 PE=4 SV=1;>tr|Q7KVS9|Q7KVS9_DROME RE04457p OS=Drosophila melanogaster GN=Trf4-1 PE=2 SV=1	0	254nm (YW) unique		NA	YW whole not available	0	1	PAP_assoc	1	1	1	1	1	1	0	0	0	0	1	1	7.18	0	NA	0	0	0	5	6	0			7.91659	8.95553					6.46944	6.85068			88.097	802;1001	4.9408e-25	0
295	A8WHF7;Q9W2A1;Q95RQ4		Snp	>tr|A8WHF7|A8WHF7_DROME CG42257, isoform G OS=Drosophila melanogaster GN=CG6393 PE=2 SV=1;>tr|Q9W2A1|Q9W2A1_DROME CG42257, isoform E OS=Drosophila melanogaster GN=CG42257 PE=4 SV=2;>tr|Q95RQ4|Q95RQ4_DROME CG42257, isoform D OS=Drosophila melanogaster GN=Sn	0		Both	0	23.0538	0	1	RNase_T	1	1	1	1	NA	NA	NA	N/A	N/A	N/A	N/A	N/A	7.94	0	NA	0	0	1	1	0	1				8.33352	7.78292	6.64123				6.3413	6.40271	5.26102	43.047	384;223;281	1.0216e-59	2.9
296	A8WHL4;Q9VDK5		bon	>tr|A8WHL4|A8WHL4_DROME Bonus, isoform B OS=Drosophila melanogaster GN=bon PE=2 SV=1;>tr|Q9VDK5|Q9VDK5_DROME Bonus, isoform A OS=Drosophila melanogaster GN=bon PE=1 SV=2	0		Both	0.302346	0	0	0	NA	NA	0	0	0	NA	NA	NA	N/A	N/A	N/A	N/A	N/A	6.46	0	maybe	1	0	7	0	0	6		7.08707			8.59282	8.36288		4.81916			6.91158	6.68164	121.14	1125;1133	1.656e-29	1.2
297	A8Y516		uex	>tr|A8Y516|A8Y516_DROME Unextended, isoform E OS=Drosophila melanogaster GN=uex PE=4 SV=2	0		Both	0	0	0	0	NA	NA	0	0	0	NA	NA	NA	N/A	N/A	N/A	N/A	N/A	6.51	0	NA	0	0	6	0	0	1					7.99889	7.34453					6.45481	5.80047	93.282	834	8.3963e-16	0
298	A8Y535;Q4QPY6	Cytochrome b-c1 complex subunit 6	Ucrh	>tr|A8Y535|A8Y535_DROME Cytochrome b-c1 complex subunit 6 OS=Drosophila melanogaster GN=Ucrh PE=3 SV=2	0		Both	0	0	0	0	NA	NA	0	0	0	NA	NA	NA	N/A	N/A	N/A	N/A	N/A	5.08	0	NA	0	0	2	0	0	3					9.33212	9.7124					8.63316	9.01343	9.897	85;86	1.8336e-302	0
299	O17445;A8Y560	60S ribosomal protein L15;Ribosomal protein L15	RpL15	>sp|O17445|RL15_DROME 60S ribosomal protein L15 OS=Drosophila melanogaster GN=RpL15 PE=1 SV=1;>tr|A8Y560|A8Y560_DROME Ribosomal protein L15 OS=Drosophila melanogaster GN=RpL15 PE=3 SV=2	0	254nm (YW) unique	Both	0	280.824	0	1	Ribosomal_L15e	1	1	1	1	1	1	0	1	1	1	1	0	11.48	1	NA	0	2	13	7	3	2	7.69288		7.77173	10.1368	10.5263	7.22637	6.78979		6.86864	8.48926	9.62319	6.32329	24.325	204;204	8.1867e-274	0
300	Q7PLP4;A8Y582;Q7PLP5;A8Y583			>tr|Q7PLP4|Q7PLP4_DROME CG41099, isoform B OS=Drosophila melanogaster GN=CG41099 PE=4 SV=1;>tr|A8Y582|A8Y582_DROME CG41099, isoform D OS=Drosophila melanogaster GN=CG41099 PE=4 SV=1;>tr|Q7PLP5|Q7PLP5_DROME CG41099, isoform C OS=Drosophila melanogaster GN=C	0		Both	0	0	0	0	NA	NA	0	0	0	NA	NA	NA	N/A	N/A	N/A	N/A	N/A	5.64	0	NA	0	1	21	0	0	1	5.94051				8.93048	7.49189	4.17707				7.16705	5.72847	123.1	1111;1122;1124;861	3.7968e-164	0
301	A8Y589;Q7PLT5		Alg-2	>tr|A8Y589|A8Y589_DROME Apoptosis-linked gene-2, isoform C OS=Drosophila melanogaster GN=Alg-2 PE=4 SV=2;>tr|Q7PLT5|Q7PLT5_DROME Apoptosis-linked gene-2, isoform D OS=Drosophila melanogaster GN=Alg-2 PE=4 SV=3	0		Both	0	0	0	0	NA	NA	0	0	0	NA	NA	NA	N/A	N/A	N/A	N/A	N/A	5.27	0	NA	0	0	5	0	0	4					8.89322	9.03771					7.89322	8.03771	20.765	178;219	3.0023e-14	0
302	P47980;B3DN56;P47980-2	Protein TIS11	Tis11;CG4070-RA	>sp|P47980|TIS1_DROME Protein TIS11 OS=Drosophila melanogaster GN=Tis11 PE=2 SV=2;>tr|B3DN56|B3DN56_DROME LD36337p OS=Drosophila melanogaster GN=Tis11 PE=2 SV=1;>sp|P47980-2|TIS1_DROME Isoform B of Protein TIS11 OS=Drosophila melanogaster GN=Tis11	0	254nm (YW) unique	254nm (YW) unique	X490 whole not available	49.9436	1	1	zf.CCCH	2	1	1	1	1	0	1	0	0	1	0	0	7.35	0	NA	1	0	0	6	1	1		6.67764	6.87256	9.33965		7.23774		4.97875	5.72644	7.50764		6.09163	47.165	436;436;408	2.4735e-20	3
303	E1JIT0;O01367;B3DNL7;O01367-2;O01367-3	Protein held out wings	how	>tr|E1JIT0|E1JIT0_DROME Held out wings, isoform E OS=Drosophila melanogaster GN=how PE=4 SV=1;>sp|O01367|HOW_DROME Protein held out wings OS=Drosophila melanogaster GN=how PE=1 SV=1;>tr|B3DNL7|B3DNL7_DROME Held out wings, isoform D OS=Drosophila melanogast	0	254nm (YW) unique	Both	0	17.4681	1	1	KH_1	1	1	1	1	0	1	1	0	0	1	1	0	7.75	0	NA	0	1	8	16	2	8	6.36752		6.81308	10.244	8.63634	8.5319	5.13707		5.58263	8.26122	7.40589	7.30144	44.226	404;405;405;375;380	7.5903e-75	0
304	P13706-3;B5RIM9;P13706;P13706-4;M9PET0;P13706-2;M9PC43;M9NE96	Glycerol-3-phosphate dehydrogenase [NAD(+)], cytoplasmic	Gpdh	>sp|P13706-3|GPDA_DROME Isoform GPDH-2 of Glycerol-3-phosphate dehydrogenase [NAD(+)], cytoplasmic OS=Drosophila melanogaster GN=Gpdh;>tr|B5RIM9|B5RIM9_DROME FI03663p OS=Drosophila melanogaster GN=Gpdh PE=2 SV=1;>sp|P13706|GPDA_DROME Glycerol-3-phosphate d	0	254nm (YW) unique	Both	0	0.00808498	0	0	NA	NA	0	0	0	0	0	0	1	0	0	1	0	6.17	0	NA	0	0	18	2	0	15				7.51081	9.57153	9.33401				5.5975	8.20981	7.97229	39.328	360;360;363;350;350;353;353;95	5.2093e-138	0
305	Q24046;B5RIR1	Sodium/potassium-transporting ATPase subunit beta-1	nrv1;nrv1-RA	>sp|Q24046|ATPB1_DROME Sodium/potassium-transporting ATPase subunit beta-1 OS=Drosophila melanogaster GN=nrv1 PE=1 SV=2;>tr|B5RIR1|B5RIR1_DROME FI04125p OS=Drosophila melanogaster GN=nrv1 PE=2 SV=1	0		Both	0	0	0	0	NA	NA	0	0	0	NA	NA	NA	N/A	N/A	N/A	N/A	N/A	6.02	0	NA	0	0	5	0	0	4					8.50823	8.39373					7.27779	7.16328	35.309	309;309	3.9028e-22	0
306	Q8T390;B5RIU6	Endophilin-A	endoA	>sp|Q8T390|SH3G3_DROME Endophilin-A OS=Drosophila melanogaster GN=endoA PE=1 SV=1;>tr|B5RIU6|B5RIU6_DROME AT06279p OS=Drosophila melanogaster GN=endoA PE=2 SV=1	0		Both	0	0	0	0	NA	NA	0	0	0	NA	NA	NA	N/A	N/A	N/A	N/A	N/A	5.38	0	NA	0	0	4	0	0	7					8.20879	8.62128					7.00467	7.41716	41.408	369;369	1.9015e-26	0
307	B5RJJ4			>tr|B5RJJ4|B5RJJ4_DROME CG11307, isoform C OS=Drosophila melanogaster GN=CG11307 PE=2 SV=1	0		Both	0	0	0	0	NA	NA	0	0	0	NA	NA	NA	N/A	N/A	N/A	N/A	N/A	5.86	0	NA	0	0	4	0	1	3			8.33389		8.18563	7.49692			7.07864		6.93035	6.24165	44.377	404	5.1022e-37	0
308	Q95028;B5RJQ0	L-lactate dehydrogenase	ImpL3;ImpL3-RA	>sp|Q95028|LDH_DROME L-lactate dehydrogenase OS=Drosophila melanogaster GN=ImpL3 PE=2 SV=1;>tr|B5RJQ0|B5RJQ0_DROME L-lactate dehydrogenase OS=Drosophila melanogaster GN=ImpL3 PE=2 SV=1	0		Both	0	0	0	0	NA	NA	0	0	0	NA	NA	NA	N/A	N/A	N/A	N/A	N/A	6.6	0	NA	0	0	1	0	0	4					8.31612	10.0408					7.14004	8.86468	35.537	332;332	1.582e-11	0
309	B5RJS0;D5SHR1;M9MQH0;H1UUM2		CG4040-RA	>tr|B5RJS0|B5RJS0_DROME CG42388, isoform E OS=Drosophila melanogaster GN=CG4040-RA PE=2 SV=1	0		Both	0	0	0	0	NA	NA	0	0	0	NA	NA	NA	N/A	N/A	N/A	N/A	N/A	6.75	0	NA	0	0	6	0	0	12					8.23507	8.70516					6.42216	6.89225	138.6	1225;671;675;768	1.463e-77	0
310	Q9VRJ9;B6IDQ5;M9PED6	Ubiquitin thioesterase OTU1	CG4603;CG4603-RA	>sp|Q9VRJ9|OTU1_DROME Ubiquitin thioesterase OTU1 OS=Drosophila melanogaster GN=CG4603 PE=2 SV=1;>tr|B6IDQ5|B6IDQ5_DROME CG4603, isoform C OS=Drosophila melanogaster GN=CG4603-RA PE=2 SV=1;>tr|M9PED6|M9PED6_DROME CG4603, isoform B OS=Drosophila melanogaste	0		Both	0	0.250675	0	0	NA	NA	0	0	0	NA	NA	NA	N/A	N/A	N/A	N/A	N/A	4.71	0	NA	0	0	10	1	1	12			8.94143	9.73856	9.68875	9.90675			7.82749	7.90944	8.57481	8.7928	37.822	347;347;371	3.9371e-198	0
311	Q9VUB4;B6IDY8	Nitrogen permease regulator 3-like protein	CG8783;CG8783-RA	>sp|Q9VUB4|NPRL3_DROME Nitrogen permease regulator 3-like protein OS=Drosophila melanogaster GN=CG8783 PE=1 SV=1;>tr|B6IDY8|B6IDY8_DROME CG8783, isoform C OS=Drosophila melanogaster GN=CG8783-RA PE=2 SV=1	0		Both	0	0	0	0	NA	NA	0	0	0	NA	NA	NA	N/A	N/A	N/A	N/A	N/A	5.64	0	NA	0	0	1	0	0	3					7.12561	7.84812					5.72766	6.45019	68.787	610;610	1.1684e-08	0
312	Q6AWM7;B7YZF6;Q0E990;B7YZF9;B7YZF7;Q8T0I4;A1Z9C8;B7YZG0;B7YZF5;B7YZF8			>tr|Q6AWM7|Q6AWM7_DROME CG42321, isoform I OS=Drosophila melanogaster GN=CG17034 PE=2 SV=1;>tr|B7YZF6|B7YZF6_DROME CG42321, isoform N OS=Drosophila melanogaster GN=CG42321 PE=4 SV=1;>tr|Q0E990|Q0E990_DROME CG42321, isoform P OS=Drosophila melanogaster GN=C	0		Both	0	0	0	0	NA	NA	0	0	0	NA	NA	NA	N/A	N/A	N/A	N/A	N/A	6.9	0	NA	0	0	6	0	0	1					9.25833	9.37079					7.459	7.57145	137.5	1216;1275;1301;1091;1095;1150;1176;1265;1324;1350	2.0451e-11	0
313	B7YZH7;B7YZH6		CG8446-RD	>tr|B7YZH7|B7YZH7_DROME CG8446, isoform D OS=Drosophila melanogaster GN=CG8446-RD PE=4 SV=1;>tr|B7YZH6|B7YZH6_DROME CG8446, isoform C OS=Drosophila melanogaster GN=CG8446 PE=4 SV=1	0		Both	0	0	0	1	DUF2638	1	1	0	0	NA	NA	NA	N/A	N/A	N/A	N/A	N/A	9.69	0	NA	0	0	3	0	0	4					8.61835	9.03354					7.91938	8.33457	7.4055	70;244	3.7746e-89	0
314	B7YZK1			>tr|B7YZK1|B7YZK1_DROME CG42306, isoform A OS=Drosophila melanogaster GN=CG42306 PE=4 SV=1	0		Both	0	0	0	0	NA	NA	0	0	0	NA	NA	NA	N/A	N/A	N/A	N/A	N/A	7.85	0	NA	0	0	1	0	0	2					6.67778	7.82253					5.97881	7.12356	13.492	121	8.8109e-06	0
315	B7YZK4;B7YZK5;B7YZK6		Jabba	>tr|B7YZK4|B7YZK4_DROME CG42351, isoform E OS=Drosophila melanogaster GN=Jabba PE=4 SV=1;>tr|B7YZK5|B7YZK5_DROME CG42351, isoform C OS=Drosophila melanogaster GN=Jabba PE=4 SV=1;>tr|B7YZK6|B7YZK6_DROME CG42351, isoform D OS=Drosophila melanogaster GN=Jabba	1	Both	Both	0.0888813	0.0166541	0	0	NA	NA	0	0	0	0	0	0	0	0	0	0	0	5.82	0	NA	3	1	22	7	1	20	6.1506	8.70375	7.42648	9.58074	10.6074	10.9381	4.8284	6.66104	6.10428	7.55493	9.28515	9.61588	49.319	438;560;367	0	9.6
316	B7YZM7;E1JGQ4;B7YZM4;B7YZM6;B7YZM5;Q7KVP5;B7YZM3;Q7KVP6;Q9W2I0		CG30387	>tr|B7YZM7|B7YZM7_DROME CG30387, isoform F OS=Drosophila melanogaster GN=CG30386 PE=4 SV=1;>tr|E1JGQ4|E1JGQ4_DROME CG30387, isoform I OS=Drosophila melanogaster GN=CG30386 PE=4 SV=1;>tr|B7YZM4|B7YZM4_DROME CG30387, isoform D OS=Drosophila melanogaster GN=C	0		365nm (X490) unique	0	NA	0	0	NA	NA	0	0	0	NA	NA	NA	N/A	N/A	N/A	N/A	N/A	6.87	0	NA	0	0	3	0	0	0					7.63318						5.77584		162.59	1476;1478;1491;1498;1550;1604;1619;1626;1678	8.89e-08	0
317	B7YZN8			>tr|B7YZN8|B7YZN8_DROME CG42381 OS=Drosophila melanogaster GN=CG9865-RA PE=4 SV=1	0		254nm (YW) unique	NA	0	0	0	NA	NA	0	0	0	NA	NA	NA	N/A	N/A	N/A	N/A	N/A	8.43	0	NA	0	0	0	0	0	2						7.66395						6.96498	8.6659	76	5.6412e-05	0
318	Q8MLP1;Q59E61;B7YZQ1;Q9W179		slik	>tr|Q8MLP1|Q8MLP1_DROME Sterile20-like kinase, isoform A OS=Drosophila melanogaster GN=slik PE=4 SV=1;>tr|Q59E61|Q59E61_DROME Sterile20-like kinase, isoform E OS=Drosophila melanogaster GN=slik PE=4 SV=1;>tr|B7YZQ1|B7YZQ1_DROME Sterile20-like kinase, isofo	0		254nm (YW) unique	NA	0	0	0	NA	NA	0	0	0	NA	NA	NA	N/A	N/A	N/A	N/A	N/A	6.12	0	NA	0	0	0	0	0	6						8.24623						6.54726	147.47	1300;1342;1635;1703	9.5381e-13	0
319	B7YZQ7;O77460	Inorganic pyrophosphatase	Nurf-38	>tr|B7YZQ7|B7YZQ7_DROME Nucleosome remodeling factor-38kD, isoform B OS=Drosophila melanogaster GN=Nurf-38 PE=4 SV=1;>sp|O77460|IPYR_DROME Inorganic pyrophosphatase OS=Drosophila melanogaster GN=Nurf-38 PE=1 SV=3	0	254nm (YW) unique	Both	0.0163471	0.0326879	0	0	NA	NA	0	0	1	0	0	0	1	1	0	0	0	5.43	0	NA	3	6	21	10	3	19	8.21582	7.94227	7.33453	9.35467	10.6443	10.4358	6.98536	6.05438	6.10408	7.43723	9.41387	9.20531	32.646	290;338	0	14.8
320	Q9V5E1;B7YZR2	Peptidyl-alpha-hydroxyglycine alpha-amidating lyase 1	Pal1	>sp|Q9V5E1|PAL1_DROME Peptidyl-alpha-hydroxyglycine alpha-amidating lyase 1 OS=Drosophila melanogaster GN=Pal1 PE=1 SV=1;>tr|B7YZR2|B7YZR2_DROME CG12130, isoform B OS=Drosophila melanogaster GN=Pal1 PE=4 SV=1	0		365nm (X490) unique	0	NA	0	0	NA	NA	0	0	0	NA	NA	NA	N/A	N/A	N/A	N/A	N/A	9.15	0	NA	0	0	1	0	0	0					7.47744						6.13501		59.641	541;564	0.001057	0
321	Q9V895;B7YZR7;Q9V895-2;E1JGK5	Acidic leucine-rich nuclear phosphoprotein 32 family member A	Anp32a;Mapmodulin	>sp|Q9V895|AN32A_DROME Acidic leucine-rich nuclear phosphoprotein 32 family member A OS=Drosophila melanogaster GN=Anp32a PE=2 SV=1;>tr|B7YZR7|B7YZR7_DROME Mapmodulin, isoform B OS=Drosophila melanogaster GN=Mapmodulin PE=4 SV=1;>sp|Q9V895-2|AN32A_DROME Is	0		Both	0	0	0	0	NA	NA	0	0	0	NA	NA	NA	N/A	N/A	N/A	N/A	N/A	4.04	0	NA	0	1	8	0	1	11	6.677		6.43278		9.82681	10.5847	5.83191		5.58768		8.98171	9.73962	29.176	261;261;363;363	0	0
322	Q9V4L4;B7YZS7;Q9V4L4-2	NF-kappa-B inhibitor-interacting Ras-like protein	kappaB-Ras	>sp|Q9V4L4|KBRAS_DROME NF-kappa-B inhibitor-interacting Ras-like protein OS=Drosophila melanogaster GN=kappaB-Ras PE=1 SV=1;>tr|B7YZS7|B7YZS7_DROME KappaB-Ras, isoform B OS=Drosophila melanogaster GN=kappaB-Ras PE=4 SV=1;>sp|Q9V4L4-2|KBRAS_DROME Isoform B	0		365nm (X490) unique	0	NA	0	0	NA	NA	0	0	1	NA	NA	NA	N/A	N/A	N/A	N/A	N/A	8.93	0	NA	0	0	1	0	0	0					7.21357						6.17219		22.807	201;201;202	4.1632e-05	0
323	B7YZT3;B7YZT2;A1Z6G3;Q8SYX2		Fis1	>tr|B7YZT3|B7YZT3_DROME CG17510, isoform E OS=Drosophila melanogaster GN=Fis1 PE=4 SV=1;>tr|B7YZT2|B7YZT2_DROME CG17510, isoform C OS=Drosophila melanogaster GN=Fis1 PE=4 SV=1;>tr|A1Z6G3|A1Z6G3_DROME CG17510, isoform D OS=Drosophila melanogaster GN=Fis1 PE	0		Both	0	0	0	0	NA	NA	0	0	0	NA	NA	NA	N/A	N/A	N/A	N/A	N/A	5.32	0	NA	0	0	5	0	0	7					8.2791	8.73795					7.32486	7.7837	16.987	148;154;92;98	2.6632e-26	0
324	Q9VK33-2;Q9VK33;M9PFS7;B7YZV6	Polycomb protein Sfmbt	Sfmbt	>sp|Q9VK33-2|SMBT_DROME Isoform A of Polycomb protein Sfmbt OS=Drosophila melanogaster GN=Sfmbt;>sp|Q9VK33|SMBT_DROME Polycomb protein Sfmbt OS=Drosophila melanogaster GN=Sfmbt PE=1 SV=2;>tr|M9PFS7|M9PFS7_DROME Scm-related gene containing four mbt domains,	0		Both	0	0	0	0	NA	NA	0	0	1	NA	NA	NA	N/A	N/A	N/A	N/A	N/A	5.27	0	maybe	0	0	1	0	1	1			6.09332		6.8726	7.41265			4.66196		5.44124	5.98128	95.866	868;1220;1220;1243	5.657e-06	0
325	Q9VJJ8;Q9VJJ9;M9PD19;B7YZW3		CG4668;CG42389-RF	>tr|Q9VJJ8|Q9VJJ8_DROME CG42389, isoform G OS=Drosophila melanogaster GN=CG4668 PE=2 SV=2;>tr|Q9VJJ9|Q9VJJ9_DROME CG42389, isoform F OS=Drosophila melanogaster GN=CG42389-RF PE=2 SV=4;>tr|M9PD19|M9PD19_DROME CG42389, isoform H OS=Drosophila melanogaster GN	0	254nm (YW) unique	365nm (X490) unique	0	YW whole not available	0	0	NA	NA	0	0	0	1	0	0	0	0	1	0	0	8.05	0	NA	0	0	1	11	0	0				9.25829	7.56151					6.8541	5.83723		153.29	1413;1762;1779;2064	2.9938e-45	0
326	B7YZX9;M9PD98;Q9VIM1			>tr|B7YZX9|B7YZX9_DROME CG31688, isoform B OS=Drosophila melanogaster GN=CG31688 PE=4 SV=1;>tr|M9PD98|M9PD98_DROME CG31688, isoform E OS=Drosophila melanogaster GN=CG31688 PE=4 SV=1;>tr|Q9VIM1|Q9VIM1_DROME CG31688, isoform F OS=Drosophila melanogaster GN=C	0		Both	0	0	0	0	NA	NA	0	0	0	NA	NA	NA	N/A	N/A	N/A	N/A	N/A	6.74	0	NA	0	0	6	0	0	4					9.18803	8.54711					8.18803	7.54711	20.62	193;204;714	4.5944e-21	0
327	B7YZY0;Q9VIK7			>tr|B7YZY0|B7YZY0_DROME CG31678, isoform C OS=Drosophila melanogaster GN=CG31678 PE=4 SV=1;>tr|Q9VIK7|Q9VIK7_DROME CG31678, isoform B OS=Drosophila melanogaster GN=CG31678 PE=2 SV=4	0		254nm (YW) unique	NA	0	0	0	NA	NA	0	0	0	NA	NA	NA	N/A	N/A	N/A	N/A	N/A	5.33	0	NA	0	0	0	0	0	1						7.28071						5.6275	137.34	1252;1417	0.00024673	0
328	P27864;B7YZZ9	Recombination repair protein 1	Rrp1	>sp|P27864|RRP1_DROME Recombination repair protein 1 OS=Drosophila melanogaster GN=Rrp1 PE=1 SV=2;>tr|B7YZZ9|B7YZZ9_DROME Recombination repair protein 1, isoform B OS=Drosophila melanogaster GN=Rrp1 PE=4 SV=1	0	Both	Both	2.32948	36.0798	0	1	Exo_endo_phos	1	1	1	1	0	1	0	0	0	1	0	0	9.06	0	NA	2	0	15	4	0	1		8.53495		9.05641	9.03411	7.11654		6.29695		6.85985	7.50262	5.58505	74.634	679;706	3.7217e-98	4
329	Q9VQL7;B7Z001;Q9VQL6;M9PB21			>tr|Q9VQL7|Q9VQL7_DROME CG3523, isoform A OS=Drosophila melanogaster GN=CG3523 PE=4 SV=1;>tr|B7Z001|B7Z001_DROME CG3523, isoform C OS=Drosophila melanogaster GN=CG3523 PE=4 SV=2	0	365nm (X490) unique	Both	0.730103	0	0	0	NA	NA	0	0	0	1	1	0	0	0	1	0	0	5.99	0	NA	6	1	52	0	1	3	6.68092	8.4862	7.66465		9.49325	7.56355	4.584	5.6868	5.56774		7.39634	5.46663	266.44	2438;2540;2409;2410	0	4.2
330	M9NEL3;M9NDB7;Q9VPL9;M9NCY5;B7Z002;Q9VPL6		kis	>tr|M9NEL3|M9NEL3_DROME Kismet, isoform F OS=Drosophila melanogaster GN=kis PE=4 SV=1;>tr|M9NDB7|M9NDB7_DROME Kismet, isoform E OS=Drosophila melanogaster GN=kis PE=4 SV=1;>tr|Q9VPL9|Q9VPL9_DROME KISMET-L long isoform OS=Drosophila melanogaster GN=kis PE=2	0		Both	0	0.0414607	0	1	BRK	1	1	0	1	NA	NA	NA	N/A	N/A	N/A	N/A	N/A	5.53	0	NA	0	0	14	1	0	27				8.02608	8.51022	9.10147				5.18622	6.25981	6.85106	560.92	5191;5252;5322;5343;5517;2151	1.2003e-123	0
331	B7Z018		Tfb5	>tr|B7Z018|B7Z018_DROME RE52596p1 OS=Drosophila melanogaster GN=Tfb5 PE=4 SV=2	0		Both	0	0	0	0	NA	NA	0	0	1	NA	NA	NA	N/A	N/A	N/A	N/A	N/A	4.73	0	NA	0	0	2	0	0	2					7.57951	7.41647					6.88053	6.7175	8.4077	73	5.6467e-05	0
332	B7Z031		pes	>tr|B7Z031|B7Z031_DROME Peste, isoform C OS=Drosophila melanogaster GN=pes PE=4 SV=1	0		Both	0	0	0	0	NA	NA	0	0	0	NA	NA	NA	N/A	N/A	N/A	N/A	N/A	6.81	0	NA	0	0	2	0	0	2					7.78693	8.09823					6.38899	6.7003	62.251	555	3.1573e-07	0
333	Q9VZY2;B7Z043		Mrtf	>tr|Q9VZY2|Q9VZY2_DROME Myocardin-related transcription factor, isoform D OS=Drosophila melanogaster GN=Mrtf PE=4 SV=3;>tr|B7Z043|B7Z043_DROME Myocardin-related transcription factor, isoform E OS=Drosophila melanogaster GN=Mrtf PE=4 SV=2	0		254nm (YW) unique	NA	0	0	1	SAP	1	1	0	1	NA	NA	NA	N/A	N/A	N/A	N/A	N/A	6.2	0	yes	0	0	0	0	0	2						7.75896						6.19075	160.89	1495;1801	6.9855e-06	0
334	M9MRW2;Q8IQM3;Q9VUR5;Q9VUR6;B7Z058;M9PFR0;M9PFL1		RhoGAP71E	>tr|M9MRW2|M9MRW2_DROME RhoGAP71E, isoform E OS=Drosophila melanogaster GN=RhoGAP71E PE=4 SV=1;>tr|Q8IQM3|Q8IQM3_DROME RhoGAP71E, isoform B OS=Drosophila melanogaster GN=RhoGAP71E PE=4 SV=1;>tr|Q9VUR5|Q9VUR5_DROME LD04071p OS=Drosophila melanogaster GN=Rho	0		365nm (X490) unique	0	NA	0	0	NA	NA	0	0	0	NA	NA	NA	N/A	N/A	N/A	N/A	N/A	8.52	0	NA	0	0	3	0	0	0					7.5543						6.15634		65.444	598;604;606;896;906;301;454	5.1045e-05	0
335	M9PI76;B7Z060;P47825-2;A4V201;P47825;E1JI11;M9PFP3	Transcription initiation factor TFIID subunit 4	Taf4	>tr|M9PI76|M9PI76_DROME TBP-associated factor 4, isoform H OS=Drosophila melanogaster GN=Taf4 PE=4 SV=1;>tr|B7Z060|B7Z060_DROME TBP-associated factor 4, isoform E OS=Drosophila melanogaster GN=Taf4 PE=4 SV=1;>sp|P47825-2|TAF4_DROME Isoform C of Transcripti	0		Both	0	0	0	0	NA	NA	0	0	1	NA	NA	NA	N/A	N/A	N/A	N/A	N/A	10.13	0	maybe	0	0	6	0	0	2					8.16002	8.00307					6.56894	6.41201	113.07	1047;1088;851;851;921;921;962	2.056e-11	0
336	Q9VVI3-2;B7Z068;M9PFK2;Q9VVI3;B7Z067;M9PFY9;Q9VVI3-4;Q9VVI3-3;Q8IQR5	E3 ubiquitin-protein ligase Nedd-4;E3 ubiquitin-protein ligase	Nedd4	>sp|Q9VVI3-2|NEDD4_DROME Isoform 2 of E3 ubiquitin-protein ligase Nedd-4 OS=Drosophila melanogaster GN=Nedd4;>tr|B7Z068|B7Z068_DROME Nedd4, isoform H OS=Drosophila melanogaster GN=Nedd4 PE=4 SV=1;>tr|M9PFK2|M9PFK2_DROME Nedd4, isoform L OS=Drosophila melan	0		Both	0	0	0	0	NA	NA	0	0	0	NA	NA	NA	N/A	N/A	N/A	N/A	N/A	6.13	0	NA	0	0	6	0	0	2					8.17557	7.3134					6.45957	5.5974	109.54	956;994;1005;1007;983;999;796;834;931	9.6088e-13	0
337	B7Z073	SOSS complex subunit C homolog	CG42374	>sp|B7Z073|SOSSC_DROME SOSS complex subunit C homolog OS=Drosophila melanogaster GN=CG42374 PE=3 SV=1	0		Both	0	0	0	0	NA	NA	0	0	0	NA	NA	NA	N/A	N/A	N/A	N/A	N/A	8.16	0	NA	0	0	3	0	0	4					7.79363	8.50809					7.31652	8.03096	13.572	129	2.15e-33	0
338	B7Z080;B7Z082;B7Z081			>tr|B7Z080|B7Z080_DROME CG9449, isoform F OS=Drosophila melanogaster GN=CG9449 PE=4 SV=1;>tr|B7Z082|B7Z082_DROME CG9449, isoform E OS=Drosophila melanogaster GN=CG9449 PE=4 SV=1;>tr|B7Z081|B7Z081_DROME CG9449, isoform D OS=Drosophila melanogaster GN=CG9449	0		365nm (X490) unique	0	NA	0	0	NA	NA	0	0	0	NA	NA	NA	N/A	N/A	N/A	N/A	N/A	6.05	0	NA	0	0	2	0	0	0					7.84074						6.51851		46.792	404;177;276	1.3456e-09	0
339	Q9VNX8;B7Z098;M9MS45	Eukaryotic translation initiation factor 2A	CG7414	>sp|Q9VNX8|EIF2A_DROME Eukaryotic translation initiation factor 2A OS=Drosophila melanogaster GN=CG7414 PE=1 SV=1;>tr|B7Z098|B7Z098_DROME CG7414, isoform D OS=Drosophila melanogaster GN=CG7414 PE=4 SV=2;>tr|M9MS45|M9MS45_DROME CG7414, isoform C OS=Drosophi	0	Both	Both	1.94988	6.29405	1	1	eIF2A	1	1	1	1	0	0	0	1	0	0	1	1	9.2	0	NA	4	0	15	17	0	8		8.75013		10.0696	9.30874	8.81367		6.5487		7.853	7.83161	7.33654	70.07	638;638;555	2.887e-165	7.5
340	B7Z0A9;B7Z0B1;Q960W9;B7Z0B0		sowah	>tr|B7Z0A9|B7Z0A9_DROME Sosondowah, isoform H OS=Drosophila melanogaster GN=sowah PE=4 SV=2;>tr|B7Z0B1|B7Z0B1_DROME Sosondowah, isoform J OS=Drosophila melanogaster GN=sowah PE=4 SV=2;>tr|Q960W9|Q960W9_DROME LD31582p OS=Drosophila melanogaster GN=sowah PE=	0		Both	0	0	0	0	NA	NA	0	0	0	NA	NA	NA	N/A	N/A	N/A	N/A	N/A	7.95	0	NA	0	0	1	0	0	1					7.10565	7.01682					5.6005	5.51168	58.657	527;548;635;780	6.6149e-06	0
341	B7Z0B8;B7Z0B9;B7Z0B7			>tr|B7Z0B8|B7Z0B8_DROME CG10625, isoform I OS=Drosophila melanogaster GN=CG10625 PE=4 SV=1;>tr|B7Z0B9|B7Z0B9_DROME CG10625, isoform H OS=Drosophila melanogaster GN=CG10625 PE=4 SV=1;>tr|B7Z0B7|B7Z0B7_DROME CG10625, isoform J OS=Drosophila melanogaster GN=C	0		254nm (YW) unique	NA	0	0	0	NA	NA	0	0	0	NA	NA	NA	N/A	N/A	N/A	N/A	N/A	8.28	0	NA	0	0	0	0	0	2						7.51566						5.92459	80.008	766;1180;752	6.9072e-06	0
342	Q9VSE1;B7Z0D7			>tr|Q9VSE1|Q9VSE1_DROME CG7504, isoform C OS=Drosophila melanogaster GN=CG7504 PE=4 SV=1;>tr|B7Z0D7|B7Z0D7_DROME CG7504, isoform B OS=Drosophila melanogaster GN=CG7504 PE=4 SV=1	0		365nm (X490) unique	0	NA	0	0	NA	NA	0	0	1	NA	NA	NA	N/A	N/A	N/A	N/A	N/A	8.73	0	NA	0	0	1	0	0	0					7.28921						5.43796		161.6	1417;1676	6.5857e-10	0.5
343	Q7KUB0;Q8IQA7;Q9VSI6;Q7KUB1;B7Z0E0	Isocitrate dehydrogenase [NADP]	Idh	>tr|Q7KUB0|Q7KUB0_DROME Isocitrate dehydrogenase [NADP] OS=Drosophila melanogaster GN=Idh PE=3 SV=1;>tr|Q8IQA7|Q8IQA7_DROME Isocitrate dehydrogenase [NADP] OS=Drosophila melanogaster GN=Idh PE=2 SV=1;>tr|Q9VSI6|Q9VSI6_DROME Isocitrate dehydrogenase [NADP]	0	Both	Both	0.0701806	0.032973	0	0	NA	NA	0	0	0	0	0	0	1	0	1	0	0	6.28	0	NA	5	2	29	8	2	27	7.54584	8.55796	7.02877	9.27557	10.5762	10.3587	6.13088	6.43457	5.6138	7.17941	9.16128	8.94372	46.66	416;437;450;469;479	0	15.4
344	B7Z0E2;M9ND61;Q9VSK3		Unr	>tr|B7Z0E2|B7Z0E2_DROME FI18812p1 OS=Drosophila melanogaster GN=Unr PE=2 SV=1;>tr|M9ND61|M9ND61_DROME Upstream of N-ras, isoform C OS=Drosophila melanogaster GN=Unr PE=4 SV=1;>tr|Q9VSK3|Q9VSK3_DROME Upstream of N-ras, isoform A OS=Drosophila melanogaster G	0	Both	Both	23.0137	1448.51	1	1	CSD	5	1	1	1	1	1	1	0	0	1	0	0	6.1	0	no	12	3	23	55	4	6	7.12937	9.82473	7.62423	11.862	9.2224	8.1124	5.43917	7.32127	5.93403	9.30066	7.53221	6.42221	118.43	1057;1032;1039	0	13.5
345	Q02870;B7Z0G1	DNA excision repair protein haywire	hay	>sp|Q02870|ERCC3_DROME DNA excision repair protein haywire OS=Drosophila melanogaster GN=hay PE=1 SV=2;>tr|B7Z0G1|B7Z0G1_DROME Haywire, isoform B OS=Drosophila melanogaster GN=hay PE=4 SV=1	0	254nm (YW) unique	365nm (X490) unique	0	YW whole not available	0	1	ResIII	1	1	0	1	0	0	0	0	0	0	0	0	8	0	no	0	0	11	12	1	0			6.4216	9.07917	8.57991				4.79835	6.78916	6.95665		90.347	798;798	3.2688e-43	0
346	Q9VTJ8;M9NDP2;B7Z0G3	Mitochondrial import inner membrane translocase subunit TIM14	Tim14	>sp|Q9VTJ8|TIM14_DROME Mitochondrial import inner membrane translocase subunit TIM14 OS=Drosophila melanogaster GN=Tim14 PE=3 SV=2;>tr|M9NDP2|M9NDP2_DROME CG7394, isoform C OS=Drosophila melanogaster GN=CG7394 PE=4 SV=1;>tr|B7Z0G3|B7Z0G3_DROME CG7394, isof	0		Both	0	0	0	0	NA	NA	0	0	0	NA	NA	NA	N/A	N/A	N/A	N/A	N/A	9.96	0	NA	0	0	4	0	0	4					8.12574	8.33451					7.34758	7.55637	12.868	118;118;128	3.9265e-20	0
347	M9PFR5;Q9VW97;B7Z0G7	Possible lysine-specific histone demethylase 1	Su(var)3-3	>tr|M9PFR5|M9PFR5_DROME Suppressor of variegation 3-3, isoform C OS=Drosophila melanogaster GN=Su(var)3-3 PE=4 SV=1;>sp|Q9VW97|LSDA_DROME Possible lysine-specific histone demethylase 1 OS=Drosophila melanogaster GN=Su(var)3-3 PE=1 SV=1;>tr|B7Z0G7|B7Z0G7_DR	0		365nm (X490) unique	0	NA	0	0	NA	NA	0	0	1	NA	NA	NA	N/A	N/A	N/A	N/A	N/A	6.87	0	NA	0	0	6	0	0	0					8.34319						6.69974		95.946	870;890;890	1.8804e-14	0
348	B7Z0I7			>tr|B7Z0I7|B7Z0I7_DROME CG42303 OS=Drosophila melanogaster GN=CG32297 PE=4 SV=1	0			NA	YW whole not available	0	0	NA	NA	0	1	0	NA	NA	NA	N/A	N/A	N/A	N/A	N/A	5.33	0	NA	0	0	0	1	0	0				8.06806						6.19681			41.503	351	1.8655e-07	0
349	B7Z0I8			>tr|B7Z0I8|B7Z0I8_DROME CG42232 OS=Drosophila melanogaster GN=CG14896 PE=4 SV=1	0	365nm (X490) unique	Both	0.255441	0	0	0	NA	NA	0	0	0	0	0	0	0	0	0	0	0	4.84	0	maybe	2	1	32	0	1	46	6.38074	7.57442	7.80679		9.11304	9.52334	4.16065	4.72731	5.58668		6.89294	7.30324	378.59	3441	2.9394e-264	0.8
350	B7Z0J4			>tr|B7Z0J4|B7Z0J4_DROME CG42375 OS=Drosophila melanogaster GN=CG42375-RA PE=4 SV=1	0		254nm (YW) unique	NA	0	0	0	NA	NA	0	0	0	NA	NA	NA	N/A	N/A	N/A	N/A	N/A	9.02	0	NA	0	0	0	0	0	1						7.54905						6.94699	9.0362	80	0.00075495	0
351	B7Z0M0		koko	>tr|B7Z0M0|B7Z0M0_DROME FI17308p1 OS=Drosophila melanogaster GN=koko PE=2 SV=1	0		254nm (YW) unique	NA	0	0	0	NA	NA	0	0	0	NA	NA	NA	N/A	N/A	N/A	N/A	N/A	5.84	0	NA	0	0	0	0	0	2						7.74407						6.96591	13.757	122	1.6154e-47	0
352	B7Z0R2;Q9VAS8		spg	>tr|B7Z0R2|B7Z0R2_DROME CG31048, isoform C OS=Drosophila melanogaster GN=spg PE=4 SV=1;>tr|Q9VAS8|Q9VAS8_DROME CG31048, isoform B OS=Drosophila melanogaster GN=spg PE=4 SV=4	0		365nm (X490) unique	0	YW whole not available	0	0	NA	NA	0	0	0	NA	NA	NA	N/A	N/A	N/A	N/A	N/A	6.39	0	NA	0	0	6	2	1	0			7.67547	7.84592	8.19769				5.68424	5.27848	6.20648		229.44	2023;2171	8.8796e-26	0
353	Q9Y157;B7Z0T0		MP1	>tr|Q9Y157|Q9Y157_DROME BcDNA.GH02921 OS=Drosophila melanogaster GN=MP1 PE=2 SV=1;>tr|B7Z0T0|B7Z0T0_DROME Melanization protease 1, isoform C OS=Drosophila melanogaster GN=MP1 PE=3 SV=1	0		365nm (X490) unique	0	NA	0	0	NA	NA	0	0	0	NA	NA	NA	N/A	N/A	N/A	N/A	N/A	6.27	0	no	0	0	3	0	0	0					7.50233						6.1599		43.704	390;399	7.6059e-07	0
354	B7Z0U7;E1JJ78;Q9VI75	Phosphatidylinositol-binding clathrin assembly protein LAP	lap	>tr|B7Z0U7|B7Z0U7_DROME Like-AP180, isoform C OS=Drosophila melanogaster GN=lap PE=4 SV=2;>tr|E1JJ78|E1JJ78_DROME Like-AP180, isoform D OS=Drosophila melanogaster GN=lap PE=4 SV=1;>sp|Q9VI75|PICAL_DROME Phosphatidylinositol-binding clathrin assembly protei	0	254nm (YW) unique	Both	0	0.231584	0	0	NA	NA	0	0	0	0	0	0	0	0	0	0	0	6.71	0	NA	0	1	12	3	0	13	6.33752			8.60344	9.06558	8.88939	4.97578			6.60989	7.70387	7.52766	80.897	758;788;468	7.0007e-200	0
355	B7Z0V1;Q9VHY5	Transcription initiation factor TFIID subunit 7	Taf7	>tr|B7Z0V1|B7Z0V1_DROME TBP-associated factor 7, isoform B OS=Drosophila melanogaster GN=Taf7 PE=4 SV=1;>sp|Q9VHY5|TAF7_DROME Transcription initiation factor TFIID subunit 7 OS=Drosophila melanogaster GN=Taf7 PE=1 SV=1	0		Both	0	0	0	0	NA	NA	0	0	1	NA	NA	NA	N/A	N/A	N/A	N/A	N/A	4.91	0	maybe	0	0	2	0	0	4					7.89825	8.38623					6.48327	6.97126	51.376	447;479	3.4991e-14	0
356	Q9VHX4;B7Z0V3			>tr|Q9VHX4|Q9VHX4_DROME CG2767, isoform A OS=Drosophila melanogaster GN=CG2767 PE=2 SV=1;>tr|B7Z0V3|B7Z0V3_DROME CG2767, isoform B OS=Drosophila melanogaster GN=CG2767 PE=4 SV=1	0		Both	0	0	0	0	NA	NA	0	0	0	NA	NA	NA	N/A	N/A	N/A	N/A	N/A	5.66	0	NA	0	0	15	0	0	15					9.35691	9.34343					8.03467	8.02123	36.862	329;349	1.2903e-107	0
357	Q9VI13;B7Z0W0		Pak	>tr|Q9VI13|Q9VI13_DROME LD20767p OS=Drosophila melanogaster GN=Pak PE=2 SV=1;>tr|B7Z0W0|B7Z0W0_DROME PAK-kinase, isoform D OS=Drosophila melanogaster GN=Pak PE=4 SV=1	0		Both	0	0	0	0	NA	NA	0	0	0	NA	NA	NA	N/A	N/A	N/A	N/A	N/A	6.89	0	NA	0	0	5	0	0	9					8.27307	8.96416					6.87513	7.56623	76.186	704;815	5.1229e-37	0
358	B7Z0W3;Q9VI21;E1JJ71			>tr|B7Z0W3|B7Z0W3_DROME CG1021, isoform G OS=Drosophila melanogaster GN=Dmtn PE=4 SV=1;>tr|Q9VI21|Q9VI21_DROME CG1021, isoform D OS=Drosophila melanogaster GN=Dmtn PE=2 SV=3;>tr|E1JJ71|E1JJ71_DROME CG1021, isoform H OS=Drosophila melanogaster GN=Dmtn PE=4	0		254nm (YW) unique	NA	0	0	0	NA	NA	0	0	0	NA	NA	NA	N/A	N/A	N/A	N/A	N/A	7.16	0	NA	0	0	0	0	0	3						8.17056						6.80884	54.59	500;638;679	7.2914e-07	0
359	Q9W4E2-3;B7Z0W8;Q9W4E2-2;Q9W4E2;Q0KHV9;B7Z0X3	Neurobeachin	rg	>sp|Q9W4E2-3|NBEA_DROME Isoform S of Neurobeachin OS=Drosophila melanogaster GN=rg;>tr|B7Z0W8|B7Z0W8_DROME Rugose, isoform F OS=Drosophila melanogaster GN=rg PE=4 SV=1;>sp|Q9W4E2-2|NBEA_DROME Isoform B of Neurobeachin OS=Drosophila melanogaster GN=rg;>sp|Q	0		254nm (YW) unique	NA	0	0	0	NA	NA	0	0	0	NA	NA	NA	N/A	N/A	N/A	N/A	N/A	5.4	0	NA	0	0	0	0	0	1						6.98559						4.8009	369.57	3315;3505;3522;3578;3712;3722	3.2304e-07	0
360	B7Z0X1;Q9W457	Serine hydroxymethyltransferase		>tr|B7Z0X1|B7Z0X1_DROME Serine hydroxymethyltransferase OS=Drosophila melanogaster GN=CG3011 PE=3 SV=1;>tr|Q9W457|Q9W457_DROME Serine hydroxymethyltransferase OS=Drosophila melanogaster GN=CG3011 PE=2 SV=1	0	Both	Both	0.0245404	0.00768091	0	0	NA	NA	0	0	0	0	0	0	1	1	0	0	0	7.59	0	NA	2	0	30	2	0	25		7.67809		8.01231	10.2256	9.82095		5.59535		5.97674	8.7784	8.37379	50.984	467;537	0	5.8
361	Q24537-3;Q24537-2;Q24537;B7Z0Z0	High mobility group protein DSP1	Dsp1	>sp|Q24537-3|HMG2_DROME Isoform A of High mobility group protein DSP1 OS=Drosophila melanogaster GN=Dsp1;>sp|Q24537-2|HMG2_DROME Isoform D of High mobility group protein DSP1 OS=Drosophila melanogaster GN=Dsp1;>sp|Q24537|HMG2_DROME High mobility group prot	0	254nm (YW) unique	Both	0.0311735	0.439092	0	0	NA	NA	0	0	1	1	1	1	0	0	1	1	0	8.52	0	yes	1	1	3	3	0	6	6.28226	6.76342		9.25127	9.28269	9.21179	5.28226	5.20355		7.57187	8.28269	8.21179	43.907	385;386;393;397	8.0144e-23	3.4
362	B7Z0Z1;Q9VXG1-2;Q9VXG1	Zinc finger protein hangover	hang	>tr|B7Z0Z1|B7Z0Z1_DROME Hangover, isoform C OS=Drosophila melanogaster GN=hang PE=4 SV=1;>sp|Q9VXG1-2|HANG_DROME Isoform A of Zinc finger protein hangover OS=Drosophila melanogaster GN=hang;>sp|Q9VXG1|HANG_DROME Zinc finger protein hangover OS=Drosophila m	0		Both	0	0.161244	0	1	zf.met	3	1	0	0	NA	NA	NA	N/A	N/A	N/A	N/A	N/A	5.49	0	yes	0	0	3	1	0	4				7.72485	7.62339	8.23254				5.26545	5.7313	6.34044	242.32	2223;1900;1913	1.0373e-18	0
363	Q9VX83;B7Z0Z9;M9PHT8			>tr|Q9VX83|Q9VX83_DROME Amino acid transmembrane transporter OS=Drosophila melanogaster GN=CG4991 PE=2 SV=2;>tr|B7Z0Z9|B7Z0Z9_DROME CG4991, isoform C OS=Drosophila melanogaster GN=CG4991 PE=4 SV=1;>tr|M9PHT8|M9PHT8_DROME CG4991, isoform D OS=Drosophila mel	0		Both	0	0	0	0	NA	NA	0	0	0	NA	NA	NA	N/A	N/A	N/A	N/A	N/A	9.03	0	NA	0	0	2	0	0	1					8.25351	7.57101					6.97476	6.29226	50.813	459;477;496	2.6996e-48	0
364	B7Z107			>tr|B7Z107|B7Z107_DROME CG42376, isoform A OS=Drosophila melanogaster GN=cin-RB PE=4 SV=1	0		Both	0	0	0	0	NA	NA	0	0	0	NA	NA	NA	N/A	N/A	N/A	N/A	N/A	8.91	0	NA	0	0	4	0	0	5					8.63824	9.02342					7.93927	8.32445	10.969	92	3.7188e-38	0
365	Q9W5E1;B7Z114	RING-box protein 1A	Roc1a	>sp|Q9W5E1|RBX1A_DROME RING-box protein 1A OS=Drosophila melanogaster GN=Roc1a PE=1 SV=1;>tr|B7Z114|B7Z114_DROME Roc1a, isoform C OS=Drosophila melanogaster GN=Roc1a PE=4 SV=2	0		Both	0	0	0	0	NA	NA	0	0	0	NA	NA	NA	N/A	N/A	N/A	N/A	N/A	5.66	0	NA	0	0	2	0	0	2					8.2149	8.54829					7.73776	8.07118	12.538	108;136	1.4059e-12	0
366	B7Z120;Q8IRT7;Q1RL19;M9PIZ6;Q9W4Q4;Q8IRT8;B7Z126;M9PDQ2		tlk	>tr|B7Z120|B7Z120_DROME Tousled-like kinase, isoform I OS=Drosophila melanogaster GN=tlk PE=4 SV=1;>tr|Q8IRT7|Q8IRT7_DROME Tousled-like kinase, isoform C OS=Drosophila melanogaster GN=tlk PE=4 SV=4;>tr|Q1RL19|Q1RL19_DROME LD15160p OS=Drosophila melanogaste	0		Both	0	0	0	0	NA	NA	0	0	0	NA	NA	NA	N/A	N/A	N/A	N/A	N/A	8.89	0	NA	0	0	8	0	0	3					8.53034	7.83129					7.05323	6.35417	133.93	1242;1254;1255;1265;1266;1463;1489;1011	5.8146e-24	0
367	B7Z131;B7Z132;M9PJ95;O77086-3;B7Z129;M9PGJ9;B7Z130;O77086-2;O77086	Guanine nucleotide-releasing factor 2	C3G	>tr|B7Z131|B7Z131_DROME C3G, isoform G OS=Drosophila melanogaster GN=C3G PE=4 SV=1;>tr|B7Z132|B7Z132_DROME C3G, isoform D OS=Drosophila melanogaster GN=C3G PE=4 SV=1;>tr|M9PJ95|M9PJ95_DROME C3G, isoform I OS=Drosophila melanogaster GN=C3G PE=4 SV=1;>sp|O77	0		254nm (YW) unique	NA	0	0	0	NA	NA	0	0	0	NA	NA	NA	N/A	N/A	N/A	N/A	N/A	6.13	0	NA	0	0	0	0	0	1						7.3678						5.66022	136.52	1234;1285;1414;1416;1417;1468;1468;1520;1571	0.001008	0
368	B7Z134;Q9W391;Q9W391-2;Q6IDE0;M9NGW5;M9NDS5	Probable phosphorylase b kinase regulatory subunit alpha	CG7766	>tr|B7Z134|B7Z134_DROME CG7766, isoform D OS=Drosophila melanogaster GN=CG7766 PE=4 SV=1;>sp|Q9W391|KPBA_DROME Probable phosphorylase b kinase regulatory subunit alpha OS=Drosophila melanogaster GN=CG7766 PE=1 SV=2;>sp|Q9W391-2|KPBA_DROME Isoform B of Prob	0		365nm (X490) unique	0	NA	0	0	NA	NA	0	0	0	NA	NA	NA	N/A	N/A	N/A	N/A	N/A	6.13	0	NA	0	0	2	0	0	0					7.4128						5.6646		138.48	1227;1247;1248;1305;1338;1358	9.7979e-09	0
369	B7Z138;Q9W2X2;Q8IRL5;B7Z140		CG34408-RA	>tr|B7Z138|B7Z138_DROME CG34408, isoform D OS=Drosophila melanogaster GN=CG2967 PE=4 SV=1;>tr|Q9W2X2|Q9W2X2_DROME CG34408, isoform A OS=Drosophila melanogaster GN=CG34408-RA PE=2 SV=3;>tr|Q8IRL5|Q8IRL5_DROME CG34408, isoform B OS=Drosophila melanogaster GN	0		365nm (X490) unique	0	YW whole not available	0	0	NA	NA	0	0	0	NA	NA	NA	N/A	N/A	N/A	N/A	N/A	6.33	0	NA	0	0	2	1	0	0				7.86206	7.03997					5.40388	5.15915		162.81	1468;1532;1718;1239	6.4227e-06	0
370	E1JJM3;B7Z145;E1JJM6;Q9VYN8;M9PJK5;M9NF26	Teneurin-a	Ten-a	>tr|E1JJM3|E1JJM3_DROME Tenascin accessory, isoform H OS=Drosophila melanogaster GN=Ten-a PE=4 SV=1;>tr|B7Z145|B7Z145_DROME Tenascin accessory, isoform E OS=Drosophila melanogaster GN=Ten-a PE=4 SV=1;>tr|E1JJM6|E1JJM6_DROME Tenascin accessory, isoform G OS	0		Both	0	0	0	0	NA	NA	0	0	0	NA	NA	NA	N/A	N/A	N/A	N/A	N/A	6.12	0	NA	0	0	2	0	0	2					8.26844	9.23152					6.16122	7.12431	355.44	3263;3378;2902;3004;3004;3013	0.00011205	0
371	Q9V464;C0MIY4	Histone chaperone asf1	asf1;CG9383	>sp|Q9V464|ASF1_DROME Histone chaperone asf1 OS=Drosophila melanogaster GN=asf1 PE=1 SV=1;>tr|C0MIY4|C0MIY4_DROME Anti-silencing factor 1, isoform B OS=Drosophila melanogaster GN=asf1 PE=4 SV=1	0		Both	0	0	0	0	NA	NA	0	0	1	NA	NA	NA	N/A	N/A	N/A	N/A	N/A	4.5	0	NA	0	0	5	0	0	5					9.07214	9.28149					8.37317	8.58252	24.409	218;218	2.0676e-32	0
372	Q05783;C0MJA0	High mobility group protein D	HmgD	>sp|Q05783|HMGD_DROME High mobility group protein D OS=Drosophila melanogaster GN=HmgD PE=1 SV=1;>tr|C0MJA0|C0MJA0_DROME CG17950-PA OS=Drosophila melanogaster GN=HmgD PE=4 SV=1	0		Both	0	0	0	0	NA	NA	0	0	0	NA	NA	NA	N/A	N/A	N/A	N/A	N/A	9.2	0	yes	0	1	3	0	0	4	7.69763				9.45126	10.565	7.2205				8.97414	10.0879	12.416	112;112	5.3708e-258	0
373	Q7KUU5;C0PVB3		Alr;CG12534-RA	>tr|Q7KUU5|Q7KUU5_DROME Sulfhydryl oxidase OS=Drosophila melanogaster GN=Alr PE=3 SV=1;>tr|C0PVB3|C0PVB3_DROME Sulfhydryl oxidase OS=Drosophila melanogaster GN=Alr PE=2 SV=1	0		Both	0	0	0	0	NA	NA	0	0	0	NA	NA	NA	N/A	N/A	N/A	N/A	N/A	8.38	0	NA	0	0	1	0	0	2					7.48527	7.687					6.25481	6.45655	30.04	261;266	6.5598e-07	0
374	Q86DS1;E2QD63;C4NYP8	Hsc70-interacting protein 2;Hsc70-interacting protein 1	HIP-R;HIP	>sp|Q86DS1|F10A2_DROME Hsc70-interacting protein 2 OS=Drosophila melanogaster GN=HIP-R PE=1 SV=2;>tr|E2QD63|E2QD63_DROME Hsc/Hsp70-interacting protein related, isoform B OS=Drosophila melanogaster GN=HIP-R PE=4 SV=1;>sp|C4NYP8|F10A1_DROME Hsc70-interacting	0	254nm (YW) unique	Both	0.0545929	0.000517935	0	0	NA	NA	0	0	0	0	0	0	0	0	0	0	0	5.22	0	NA	2	5	20	2	1	26	8.00582	8.41754	6.26012	7.99919	10.5565	10.9799	6.82974	6.54464	5.08404	6.23563	9.38043	9.80383	41.036	377;377;377	0	7.4
375	C6SV41;Q9VL50;Q9VL49		Trp1-RB;Trp1	>tr|C6SV41|C6SV41_DROME AT13927p OS=Drosophila melanogaster GN=Trp1 PE=2 SV=1;>tr|Q9VL50|Q9VL50_DROME RE23984p OS=Drosophila melanogaster GN=Trp1 PE=2 SV=1;>tr|Q9VL49|Q9VL49_DROME RE57702p OS=Drosophila melanogaster GN=Trp1 PE=2 SV=1	0		Both	0	0	0	0	NA	NA	0	0	0	NA	NA	NA	N/A	N/A	N/A	N/A	N/A	4.98	0	NA	0	0	7	0	0	10					8.72783	9.33027					7.68643	8.2889	45.448	398;415;428	2.3617e-60	0
376	Q59E36-2;Q59E36;C7LAG1;M9PJR2;Q59E36-3;M9NHB6	REST corepressor	CoRest;CoRest-RF	>sp|Q59E36-2|RCOR_DROME Isoform 2 of REST corepressor OS=Drosophila melanogaster GN=CoRest;>sp|Q59E36|RCOR_DROME REST corepressor OS=Drosophila melanogaster GN=CoRest PE=1 SV=1;>tr|C7LAG1|C7LAG1_DROME CoRest, isoform G OS=Drosophila melanogaster GN=CoRest	0		Both	0	0	0	0	NA	NA	0	0	1	NA	NA	NA	N/A	N/A	N/A	N/A	N/A	5.5	0	yes	0	0	5	0	0	9					8.07569	8.8735					6.66071	7.45853	62.695	590;657;824;268;273;336	5.9305e-66	0
377	P46150-2;P46150;M9NG50;M9PHG2;P46150-3;C7LAH9;P46150-4;P46150-5	Moesin/ezrin/radixin homolog 1	Moe;Moe-RB	>sp|P46150-2|MOEH_DROME Isoform D of Moesin/ezrin/radixin homolog 1 OS=Drosophila melanogaster GN=Moe;>sp|P46150|MOEH_DROME Moesin/ezrin/radixin homolog 1 OS=Drosophila melanogaster GN=Moe PE=1 SV=2;>tr|M9NG50|M9NG50_DROME Moesin, isoform L OS=Drosophila m	0	254nm (YW) unique	Both	0.213206	1.08722	0	0	NA	NA	0	0	0	1	1	1	0	0	1	0	0	5.72	0	NA	6	11	36	31	3	34	8.27903	8.97819	8.68669	10.5689	10.4791	10.0389	6.78766	6.74362	7.19532	8.3014	8.98775	8.54755	67.857	575;578;578;584;640;646;649;512	0	12.9
378	P11420;C8VV95	Protein daughterless	da;da-RA	>sp|P11420|DA_DROME Protein daughterless OS=Drosophila melanogaster GN=da PE=1 SV=1;>tr|C8VV95|C8VV95_DROME Daughterless, isoform B OS=Drosophila melanogaster GN=da PE=2 SV=1	0		365nm (X490) unique	NA	NA	0	0	NA	NA	0	0	1	NA	NA	NA	N/A	N/A	N/A	N/A	N/A	6.58	0	yes	0	0	1	0	0	0													73.864	710;710	0.00083948	0
379	Q02748;C9QP42	Eukaryotic initiation factor 4A	eIF-4a;eIF-4a-RB	>sp|Q02748|IF4A_DROME Eukaryotic initiation factor 4A OS=Drosophila melanogaster GN=eIF-4a PE=1 SV=3;>tr|C9QP42|C9QP42_DROME Eukaryotic initiation factor 4a, isoform E OS=Drosophila melanogaster GN=eIF-4a PE=2 SV=1	0	Both	Both	1.59792	0.976548	1	1	DEAD	1	1	1	1	1	1	1	0	0	1	1	0	5.43	0	NA	22	14	34	31	15	31	8.79999	10.5307	8.85114	11.4023	11.0283	10.8577	7.43826	8.29721	7.48941	9.2032	9.66658	9.49597	45.878	403;403	0	53.3
380	P11929;C9QPC2;Q8IPK8;M9PB42;M9MRD3;Q9VMS6;M9PC27	Blastoderm-specific protein 25D	Bsg25D;Bsg25D-RC	>sp|P11929|BSG2_DROME Blastoderm-specific protein 25D OS=Drosophila melanogaster GN=Bsg25D PE=1 SV=2;>tr|C9QPC2|C9QPC2_DROME Blastoderm-specific gene 25D, isoform D OS=Drosophila melanogaster GN=Bsg25D PE=2 SV=1;>tr|Q8IPK8|Q8IPK8_DROME Blastoderm-specific	0		Both	0	0	0	0	NA	NA	0	0	0	NA	NA	NA	N/A	N/A	N/A	N/A	N/A	4.74	0	NA	0	0	1	0	0	4					7.07262	7.86154					5.44935	6.2383	84.372	741;769;1032;1071;1079;1091;1118	2.4045e-09	0
381	Q9VM19;C9QPE7		CG5171-RC	>tr|Q9VM19|Q9VM19_DROME CG5171, isoform A OS=Drosophila melanogaster GN=CG5171 PE=2 SV=1;>tr|C9QPE7|C9QPE7_DROME CG5171, isoform D OS=Drosophila melanogaster GN=CG5171-RC PE=2 SV=1	0		Both	0	0	0	0	NA	NA	0	0	0	NA	NA	NA	N/A	N/A	N/A	N/A	N/A	6.11	0	NA	0	0	1	0	0	3					7.77109	7.7501					6.54064	6.51966	30.616	273;296	1.3667e-07	0
382	CON__A3EZ82;CON__A3EZ79			>A3EZ82 TREMBL:A3EZ82;Q32W66 Tax_Id=9606 Gene_Symbol=DMKN Dermokine;>A3EZ79 TREMBL:A3EZ79;Q32W65;Q6UXC7 Tax_Id=9606 Gene_Symbol=DMKN Dermokine beta-1	0			NA	NA	0	0	NA	NA	0	0	0	NA	NA	NA	N/A	N/A	N/A	N/A	N/A	NA	0	NA	0	0	0	0	2	0			8.6049						7.37446				47.082	476;449	3.5606e-54	0
383	CON__ENSEMBL:ENSBTAP00000016242			>ENSEMBL:ENSBTAP00000016242 (Bos taurus) similar to alpha-tubulin I isoform 1	0			19.4259	NA	0	0	NA	NA	0	0	0	NA	NA	NA	N/A	N/A	N/A	N/A	N/A	NA	0	NA	1	0	1	7	6	0		8.08714	9.8291	9.83954	7.70222			6.09545	8.50688	7.79472	6.37999		50.179	451	0	14.6
384	CON__ENSEMBL:ENSBTAP00000024466;CON__ENSEMBL:ENSBTAP00000024462			>ENSEMBL:ENSBTAP00000024466 (Bos taurus) 44 kDa protein;>ENSEMBL:ENSBTAP00000024462 (Bos taurus) 47 kDa protein	0			NA	NA	0	0	NA	NA	0	0	0	NA	NA	NA	N/A	N/A	N/A	N/A	N/A	NA	0	NA	0	0	0	0	1	0			7.5301						6.29966				43.9	401;419	2.0138e-05	0
385	CON__ENSEMBL:ENSBTAP00000038253			>ENSEMBL:ENSBTAP00000038253 (Bos taurus) 63 kDa protein	0			NA	NA	0	0	NA	NA	0	0	0	NA	NA	NA	N/A	N/A	N/A	N/A	N/A	NA	0	NA	1	0	0	0	2	0		7.38869	8.52948					5.27191	7.02432				63.165	606	0	16.7
386	CON__H-INV:HIT000015463			>H-INV:HIT000015463 Tax_Id=9606 Gene_Symbol=PTPN14 Similar to Keratin 18	0			NA	NA	0	0	NA	NA	0	0	0	NA	NA	NA	N/A	N/A	N/A	N/A	N/A	NA	0	NA	0	0	0	1	0	0				8.54003						6.87147			33.423	295	3.2651e-11	0
387	CON__O43790;CON__Q6NT21;CON__P78385;CON__Q14533;CON__Q61726			>O43790 SWISS-PROT:O43790 Keratin, type II cuticular Hb6 (Hair keratin, type II Hb6) (ghHb6) - Homo sapiens (Human).;>Q6NT21 TREMBL:Q6NT21 Keratin, hair, basic, 3 - Homo sapiens (Human).;>P78385 SWISS-PROT:P78385 Keratin, type II cuticular Hb3 (Hair kerati	0			NA	NA	0	0	NA	NA	0	0	0	NA	NA	NA	N/A	N/A	N/A	N/A	N/A	NA	0	NA	1	1	1	0	7	0	6.39499	7.22683	7.61017				4.90364	5.13723	6.11879				53.5	486;493;493;505;479	5.2762e-27	1.4
388	CON__O76013;CON__O76015;CON__Q6IFU5			>O76013 SWISS-PROT:O76013 Keratin, type I cuticular HA6 (Hair keratin, type I HA6);>O76015 SWISS-PROT:O76015 Keratin, type I cuticular HA8 (Hair keratin, type I HA8)	0			NA	NA	0	0	NA	NA	0	0	0	NA	NA	NA	N/A	N/A	N/A	N/A	N/A	NA	0	NA	0	0	0	0	1	0			8.80994						7.37858				52.247	467;456;431	7.0581e-20	1.5
389	CON__O95678			>O95678 SWISS-PROT:O95678 Tax_Id=9606 Gene_Symbol=KRT75 Keratin, type II cytoskeletal 75	0			NA	NA	0	0	NA	NA	0	0	0	NA	NA	NA	N/A	N/A	N/A	N/A	N/A	NA	0	NA	0	0	0	0	10	0			8.74497						7.26785				59.504	551	0	7.8
390	CON__P00711			>P00711 SWISS-PROT:P00711 Alpha-lactalbumin - Bos taurus (Bovine).	0			NA	NA	0	0	NA	NA	0	0	0	NA	NA	NA	N/A	N/A	N/A	N/A	N/A	NA	0	NA	1	1	0	3	5	0	6.53377	7.93641	8.53901	8.75062			5.93172	6.67738	7.93695	7.50594			14.186	123	3.2436e-41	11.4
391	CON__P00761			>P00761 SWISS-PROT:P00761|TRYP_PIG Trypsin - Sus scrofa (Pig).	0			109.243	18.4734	0	0	NA	NA	0	0	0	NA	NA	NA	N/A	N/A	N/A	N/A	N/A	NA	0	NA	4	7	5	10	10	5	11.3693	11.9735	11.5107	12.4898	10.5169	10.5885	10.3279	9.94098	10.4693	10.5312	9.47551	9.54709	24.409	231	0	25.1
392	CON__P02533			>P02533 SWISS-PROT:P02533 Tax_Id=9606 Gene_Symbol=KRT14 Keratin, type I cytoskeletal 14	0			54.2172	14.3309	0	0	NA	NA	0	0	0	NA	NA	NA	N/A	N/A	N/A	N/A	N/A	NA	0	NA	28	38	7	20	67	11	10.4049	10.1564	11.9666	10.8742	9.15439	9.20178	8.9425	7.85321	10.5042	8.61318	7.692	7.73937	51.621	472	0	53
393	CON__P02535-1			>P02535-1 SWISS-PROT:P02535-1 Tax_Id=10090 Gene_Symbol=Krt10 Isoform 1 of Keratin, type I cytoskeletal 10	0			NA	NA	0	0	NA	NA	0	0	0	NA	NA	NA	N/A	N/A	N/A	N/A	N/A	NA	0	NA	0	1	0	0	2	0	6.97175		8.08799				5.55677		6.67301				57.769	570	0	13.5
394	CON__P02538			>P02538 SWISS-PROT:P02538 Tax_Id=9606 Gene_Symbol=KRT6A Keratin, type II cytoskeletal 6A	0			220.199	15.9935	0	0	NA	NA	0	0	0	NA	NA	NA	N/A	N/A	N/A	N/A	N/A	NA	0	NA	17	29	4	18	63	8	10.0393	9.9991	11.8762	10.0792	8.4015	8.41755	8.5622	7.69427	10.399	7.8619	6.92438	6.94043	60.044	564	0	36.5
395	CON__P02662			>P02662 SWISS-PROT:P02662 Alpha-S1-casein - Bos taurus (Bovine).	0			22.5185	16.5665	0	0	NA	NA	0	0	0	NA	NA	NA	N/A	N/A	N/A	N/A	N/A	NA	0	NA	2	7	4	7	12	5	9.55855	9.70193	10.746	11.1966	9.11919	9.43759	8.60431	7.94456	9.79175	9.4201	8.16495	8.48334	22.975	199	0	13.6
396	CON__P02663			>P02663 SWISS-PROT:P02663 Alpha-S2-casein [Contains: Casocidin-1 - Bos taurus (Bovine).	0			198.891	60.4154	0	0	NA	NA	0	0	0	NA	NA	NA	N/A	N/A	N/A	N/A	N/A	NA	0	NA	4	7	2	7	13	3	8.91589	9.20896	10.1969	10.8192	7.72094	8.52599	7.87449	7.40524	9.15555	8.98327	6.67956	7.4846	24.348	207	1.6358e-71	18.8
397	CON__P02666			>P02666 SWISS-PROT:P02666 Beta-casein - Bos taurus (Bovine).	0			0	28.9832	0	0	NA	NA	0	0	0	NA	NA	NA	N/A	N/A	N/A	N/A	N/A	NA	0	NA	0	4	1	4	5	1	7.8361		10.0491	10.4926	8.17551	8.54231	7.05793		9.27093	8.94384	7.39737	7.76416	23.583	209	0	0
398	CON__P02668			>P02668 SWISS-PROT:P02668 Kappa-casein [Contains: Casoxin C; Casoxin 6; Casoxin A; Casoxin B; Casoplatelin] - Bos taurus (Bovine).	0			36.8763	2.81491	0	0	NA	NA	0	0	0	NA	NA	NA	N/A	N/A	N/A	N/A	N/A	NA	0	NA	4	4	4	6	7	4	8.69	9.07014	9.4809	9.75489	8.3255	8.87153	7.8449	7.47422	8.63581	8.1934	7.4804	8.02641	18.974	169	0	33.7
399	CON__P02676			>P02676 SWISS-PROT:P02676 (Bos taurus) similar to Fibrinogen beta chain precursor	0			NA	NA	0	0	NA	NA	0	0	0	NA	NA	NA	N/A	N/A	N/A	N/A	N/A	NA	0	NA	0	0	0	0	1	0													56.44	495	0.0006657	0
400	CON__P02754			>P02754 SWISS-PROT:P02754 Beta-lactoglobulin - Bos taurus (Bovine).	0			8.22322	32.2453	0	0	NA	NA	0	0	0	NA	NA	NA	N/A	N/A	N/A	N/A	N/A	NA	0	NA	4	9	4	11	13	4	8.84024	8.78134	10.0825	10.642	8.71232	8.63451	7.79885	7.01305	9.04116	8.8191	7.67093	7.59311	18.281	162	0	26.5
401	CON__P02768-1			>P02768-1 SWISS-PROT:P02768-1 Tax_Id=9606 Gene_Symbol=ALB Isoform 1 of Serum albumin precursor	0			NA	NA	0	0	NA	NA	0	0	0	NA	NA	NA	N/A	N/A	N/A	N/A	N/A	NA	0	NA	5	6	0	3	18	0	7.81365	8.80198	9.43804	8.24324			6.25734	6.51704	7.88173	6.08156			69.366	609	9.033e-208	10.8
402	CON__P02769			>P02769 SWISS-PROT:P02769 (Bos taurus) Bovine serum albumin precursor	0			4.90366	2.22317	0	0	NA	NA	0	0	0	NA	NA	NA	N/A	N/A	N/A	N/A	N/A	NA	0	NA	7	35	19	42	57	22	9.63013	9.19573	10.6477	10.8692	9.31691	10.0065	8.02808	6.83245	9.04567	8.46892	7.71486	8.40442	69.293	607	0	11.2
403	CON__P04259			>P04259 SWISS-PROT:P04259 Tax_Id=9606 Gene_Symbol=KRT6B Keratin, type II cytoskeletal 6B	0			NA	NA	0	0	NA	NA	0	0	0	NA	NA	NA	N/A	N/A	N/A	N/A	N/A	NA	0	NA	2	2	0	1	10	0	8.1805	7.82588	10.9282	8.44696			6.70336	5.70094	9.45103	6.34951			59.998	564	0	38.7
404	CON__P04264;CON__H-INV:HIT000016045			>P04264 SWISS-PROT:P04264 Tax_Id=9606 Gene_Symbol=KRT1 Keratin, type II cytoskeletal 1	0			57.3376	11.4495	0	0	NA	NA	0	0	0	NA	NA	NA	N/A	N/A	N/A	N/A	N/A	NA	0	NA	38	61	33	47	81	35	11.2517	11.4191	11.9911	11.8641	10.2884	10.2165	9.76032	8.98251	10.4997	9.5015	8.797	8.72518	66.017	644;99	0	51.9
405	CON__P05784			>P05784 SWISS-PROT:P05784 Tax_Id=10090 Gene_Symbol=Krt18 Keratin, type I cytoskeletal 18	0			NA	NA	0	0	NA	NA	0	0	0	NA	NA	NA	N/A	N/A	N/A	N/A	N/A	NA	0	NA	0	0	0	1	1	0			7.41405	7.84561					5.99909	5.85447			47.538	423	9.2413e-24	3.3
406	CON__P05787;CON__H-INV:HIT000292931			>P05787 SWISS-PROT:P05787 Tax_Id=9606 Gene_Symbol=KRT8 Keratin, type II cytoskeletal 8;>H-INV:HIT000292931 Tax_Id=9606 Gene_Symbol=- Similar to Keratin, type II cytoskeletal 8	0			NA	NA	0	0	NA	NA	0	0	0	NA	NA	NA	N/A	N/A	N/A	N/A	N/A	NA	0	NA	1	0	0	6	1	0		7.2546		8.8778				5.19165		6.76344			53.704	483;443	0	8.3
407	CON__P07477			>P07477 SWISS-PROT:P07477 Tax_Id=9606 Gene_Symbol=PRSS1 Trypsin-1 precursor	0			71.9586	152.003	0	0	NA	NA	0	0	0	NA	NA	NA	N/A	N/A	N/A	N/A	N/A	NA	0	NA	1	1	1	1	1	1	9.65319	9.77237	10.148	11.4059	8.67926	8.66884	8.7501	8.06032	9.24487	9.66513	7.77616	7.76575	26.558	247	1.0003e-56	8.1
408	CON__P08727			>P08727 SWISS-PROT:P08727 Tax_Id=9606 Gene_Symbol=KRT19 Keratin, type I cytoskeletal 19	0			NA	NA	0	0	NA	NA	0	0	0	NA	NA	NA	N/A	N/A	N/A	N/A	N/A	NA	0	NA	1	0	0	1	4	0		6.28679	8.83645	7.47988				4.27501	7.34508	5.43921			44.091	400	2.7799e-257	14.5
409	CON__Q3KNV1;CON__P08729			>Q3KNV1 TREMBL:Q3KNV1;Q96GE1 Tax_Id=9606 Gene_Symbol=KRT7 keratin 7;>P08729 SWISS-PROT:P08729 Tax_Id=9606 Gene_Symbol=KRT7 Keratin, type II cytoskeletal 7	0			NA	NA	0	0	NA	NA	0	0	0	NA	NA	NA	N/A	N/A	N/A	N/A	N/A	NA	0	NA	0	0	0	3	1	0			7.7175	8.7831					6.2551	6.67569			51.385	469;469	4.6539e-59	1.9
410	CON__P08730-1;CON__Q8N1A0			>P08730-1 SWISS-PROT:P08730-1 Tax_Id=10090 Gene_Symbol=Krt13 Isoform 1 of Keratin, type I cytoskeletal 13	0			NA	NA	0	0	NA	NA	0	0	0	NA	NA	NA	N/A	N/A	N/A	N/A	N/A	NA	0	NA	0	0	0	0	1	0			7.33858						5.90722				47.754	437;295	0	8.9
411	CON__P08779			>P08779 SWISS-PROT:P08779 Tax_Id=9606 Gene_Symbol=KRT16 Keratin, type I cytoskeletal 16	0			737.964	16.9215	0	0	NA	NA	0	0	0	NA	NA	NA	N/A	N/A	N/A	N/A	N/A	NA	0	NA	12	20	1	13	39	2	9.59596	9.59477	11.81	9.4689	7.50539	7.82755	8.13357	7.33812	10.3476	7.31112	6.04301	6.36515	51.267	473	0	52
412	CON__P12035			>P12035 SWISS-PROT:P12035 Tax_Id=9606 Gene_Symbol=KRT3 Keratin, type II cytoskeletal 3	0			NA	NA	0	0	NA	NA	0	0	0	NA	NA	NA	N/A	N/A	N/A	N/A	N/A	NA	0	NA	1	0	0	0	2	0		7.43301	8.8525					5.31256	7.34735				64.503	629	0	9.1
413	CON__P12763			>P12763 SWISS-PROT:P12763 (Bos taurus) Alpha-2-HS-glycoprotein precursor	0			NA	NA	0	0	NA	NA	0	0	0	NA	NA	NA	N/A	N/A	N/A	N/A	N/A	NA	0	NA	2	2	0	7	7	0	7.6861	7.47739	8.95758	9.29663			6.53997	5.71229	7.81145	7.46777			38.418	359	5.2063e-103	8.6
414	CON__P13645;CON__Q2M2I5;CON__Q99456;CON__Q7Z3Y9			>P13645 SWISS-PROT:P13645 Tax_Id=9606 Gene_Symbol=KRT10 Keratin, type I cytoskeletal 10	0			55.9037	24.8376	0	0	NA	NA	0	0	0	NA	NA	NA	N/A	N/A	N/A	N/A	N/A	NA	0	NA	33	46	25	35	51	25	11.0632	11.0646	11.7384	11.7374	9.97417	9.76275	9.64823	8.7337	10.3234	9.46042	8.55919	8.34778	59.51	593;525;494;468	0	56.7
415	CON__P13646-1			>P13646-1 SWISS-PROT:P13646-1 Tax_Id=9606 Gene_Symbol=KRT13 Isoform 1 of Keratin, type I cytoskeletal 13	0			NA	NA	0	0	NA	NA	0	0	0	NA	NA	NA	N/A	N/A	N/A	N/A	N/A	NA	0	NA	1	0	0	3	6	0		7.64873	8.62538	8.62612				5.5684	7.17823	6.54547			49.586	458	0	9.2
416	CON__P13647			>P13647 SWISS-PROT:P13647 Tax_Id=9606 Gene_Symbol=KRT5 Keratin, type II cytoskeletal 5	0			555.358	49.66	0	0	NA	NA	0	0	0	NA	NA	NA	N/A	N/A	N/A	N/A	N/A	NA	0	NA	16	28	1	15	46	7	9.75812	9.43808	11.5058	10.2352	7.48514	8.06996	8.26675	7.16542	10.0144	7.99215	5.99378	6.57862	62.378	590	0	35.9
417	CON__P13717			>P13717 SWISS-PROT:P13717 Nuclease - Serratia marcescens.	0			NA	NA	0	0	NA	NA	0	0	0	NA	NA	NA	N/A	N/A	N/A	N/A	N/A	NA	0	NA	13	18	0	26	28	0	10.8793	11.1828	11.2514	12.0745			9.76536	9.14317	10.1375	10.0738			28.944	266	0	64.7
418	CON__P15497			>P15497 SWISS-PROT:P15497 (Bos taurus) Apolipoprotein A-I precursor	0			NA	NA	0	0	NA	NA	0	0	0	NA	NA	NA	N/A	N/A	N/A	N/A	N/A	NA	0	NA	0	0	0	0	8	0			7.71364						6.48319				30.276	265	6.5795e-22	0
419	CON__P15636			>P15636 SWISS-PROT:P15636 Protease I precursor Lysyl endopeptidase Achromobacter lyticus.	0			0	0.00047293	0	0	NA	NA	0	0	0	NA	NA	NA	N/A	N/A	N/A	N/A	N/A	NA	0	NA	0	0	13	2	0	14				7.99857	10.9776	11.0189				6.03096	9.59739	9.63864	68.124	653	0	0
420	CON__P19013			>P19013 SWISS-PROT:P19013 Tax_Id=9606 Gene_Symbol=KRT4 keratin 4	0			NA	NA	0	0	NA	NA	0	0	0	NA	NA	NA	N/A	N/A	N/A	N/A	N/A	NA	0	NA	2	1	0	10	14	0	7.74617	7.28635	8.64996	9.37525			6.25481	5.19181	7.1586	7.19537			63.91	594	1.1353e-197	9.1
421	CON__P20930			>P20930 SWISS-PROT:P20930 Tax_Id=9606 Gene_Symbol=FLG Filaggrin	0			NA	NA	0	0	NA	NA	0	0	0	NA	NA	NA	N/A	N/A	N/A	N/A	N/A	NA	0	NA	0	5	0	0	21	0	7.83719		9.97526				5.51497		7.65305				435.16	4061	0	0
422	CON__P34955			>P34955 SWISS-PROT:P34955 (Bos taurus) Alpha-1-antiproteinase precursor	0			NA	NA	0	0	NA	NA	0	0	0	NA	NA	NA	N/A	N/A	N/A	N/A	N/A	NA	0	NA	0	0	0	6	8	0			8.65645	9.19755					7.33423	7.19989			46.103	416	2.181e-61	0
423	CON__P35527			>P35527 SWISS-PROT:P35527 Tax_Id=9606 Gene_Symbol=KRT9 Keratin, type I cytoskeletal 9	0			81.7741	15.8732	0	0	NA	NA	0	0	0	NA	NA	NA	N/A	N/A	N/A	N/A	N/A	NA	0	NA	29	45	23	34	58	23	10.8815	10.9549	11.5633	11.4192	9.70835	9.66239	9.46651	8.63307	10.1484	9.1656	8.29338	8.24741	62.129	623	0	52.3
424	CON__P35908			>P35908 SWISS-PROT:P35908 Tax_Id=9606 Gene_Symbol=KRT2 Keratin, type II cytoskeletal 2 epidermal	0			54.0183	28.6276	0	0	NA	NA	0	0	0	NA	NA	NA	N/A	N/A	N/A	N/A	N/A	NA	0	NA	31	61	21	43	70	22	10.8254	10.6188	11.4891	11.3586	9.58015	9.35017	9.23434	8.1487	9.89802	8.93341	7.98908	7.75909	65.865	645	0	45.4
425	CON__P48668			>P48668 SWISS-PROT:P48668 Tax_Id=9606 Gene_Symbol=KRT6C Keratin, type II cytoskeletal 6C	0			NA	NA	0	0	NA	NA	0	0	0	NA	NA	NA	N/A	N/A	N/A	N/A	N/A	NA	0	NA	0	0	0	0	2	0			9.69057						8.21344				60.024	564	0	36
426	CON__P50446			>P50446 SWISS-PROT:P50446 Tax_Id=10090 Gene_Symbol=Krt6a Keratin, type II cytoskeletal 6A	0			NA	NA	0	0	NA	NA	0	0	0	NA	NA	NA	N/A	N/A	N/A	N/A	N/A	NA	0	NA	0	0	0	0	2	0			7.78676						6.32436				59.334	553	0	20.4
427	CON__P60712			>P60712 SWISS-PROT:P60712 (Bos taurus) Actin, cytoplasmic 1	0			0	20.315	0	0	NA	NA	0	0	0	NA	NA	NA	N/A	N/A	N/A	N/A	N/A	NA	0	NA	0	0	2	2	1	1			9.72328	9.42647	7.92435	7.70885			8.42225	7.43316	6.62332	6.40782	41.736	375	0	28
428	CON__P62894			>P62894 SWISS-PROT:P62894 Cytochrome c - Bos taurus (Bovine).	0			NA	NA	0	0	NA	NA	0	0	0	NA	NA	NA	N/A	N/A	N/A	N/A	N/A	NA	0	NA	0	0	0	0	1	0			7.64766						6.8695				11.703	105	4.6546e-05	0
429	CON__P78386			>P78386 SWISS-PROT:P78386 Keratin, type II cuticular Hb5 (Hair keratin, type II Hb5) - Homo sapiens (Human).	0			NA	NA	0	0	NA	NA	0	0	0	NA	NA	NA	N/A	N/A	N/A	N/A	N/A	NA	0	NA	1	0	0	0	1	0		7.02166	6.62538					4.92189	5.10687				55.802	507	6.7395e-16	4.1
430	CON__P81644			>P81644 SWISS-PROT:P81644 (Bos taurus) Apolipoprotein A-II precursor	0			NA	NA	0	0	NA	NA	0	0	0	NA	NA	NA	N/A	N/A	N/A	N/A	N/A	NA	0	NA	0	0	0	1	1	0			6.45335	7.80292					5.75437	6.5309			11.202	100	2.4003e-05	0
431	CON__Q04695			>Q04695 SWISS-PROT:Q04695 Tax_Id=9606 Gene_Symbol=KRT17 Keratin, type I cytoskeletal 17	0			NA	NA	0	0	NA	NA	0	0	0	NA	NA	NA	N/A	N/A	N/A	N/A	N/A	NA	0	NA	5	16	0	7	34	0	8.88038	8.07231	11.1519	9.068			7.41799	5.94168	9.6895	6.93966			48.105	432	0	32.2
432	CON__Q29443;CON__Q0IIK2;CON__Q2HJF0			>Q29443 SWISS-PROT:Q29443 Serotransferrin - Bos taurus (Bovine).;>Q0IIK2 TREMBL:Q0IIK2 (Bos taurus) Transferrin	0			NA	NA	0	0	NA	NA	0	0	0	NA	NA	NA	N/A	N/A	N/A	N/A	N/A	NA	0	NA	0	0	0	2	8	0			7.90015	8.18956					6.26668	5.95466			75.829	685;704;622	8.8603e-19	0
433	CON__Q14525			>Q14525 SWISS-PROT:Q14525 Keratin, type I cuticular HA3-II (Hair keratin, type I HA3-II)	0			NA	NA	0	0	NA	NA	0	0	0	NA	NA	NA	N/A	N/A	N/A	N/A	N/A	NA	0	NA	0	0	0	0	7	0			7.60797						6.17661				46.213	404	3.7144e-68	1.7
434	CON__Q9UE12;CON__Q15323;CON__Q9D646;CON__Q6NTB9;CON__O76009;CON__A2A5Y0;CON__REFSEQ:XP_986630;CON__O76011;CON__Q8IUT8;CON__Q14532;CON__O76014			>Q9UE12 TREMBL:Q9UE12 Type I hair keratin 1 - Homo sapiens (Human).;>Q15323 SWISS-PROT:Q15323 Keratin, type I cuticular HA1 (Hair keratin, type I HA1);>Q9D646 TREMBL:Q9D646 Tax_Id=10090 Gene_Symbol=Krt34 10 days neonate skin cDNA, RIKEN full-length enriche	0			NA	NA	0	0	NA	NA	0	0	0	NA	NA	NA	N/A	N/A	N/A	N/A	N/A	NA	0	NA	0	1	0	0	0	0	6.66003						5.24507						47.237	416;416;392;404;404;416;476;394;436;448;471	3.2889e-68	1.7
435	CON__Q2KIT0			>Q2KIT0 TREMBL:Q2KIT0 (Bos taurus) Similar to collagen, type X, alpha 1	0			0	0	0	0	NA	NA	0	0	0	NA	NA	NA	N/A	N/A	N/A	N/A	N/A	NA	0	NA	0	0	1	0	0	1					7.87214	8.31936					6.83075	7.27795	20.646	191	0.00077509	0
436	CON__Q2UVX4			>Q2UVX4 SWISS-PROT:Q2UVX4 (Bos taurus) Complement C3 precursor	0			NA	NA	0	0	NA	NA	0	0	0	NA	NA	NA	N/A	N/A	N/A	N/A	N/A	NA	0	NA	0	0	0	0	4	0			8.6099						6.61427				187.37	1662	3.4896e-58	0
437	CON__Q32MB2			>Q32MB2 TREMBL:Q32MB2;Q86Y46 Tax_Id=9606 Gene_Symbol=KRT73 Keratin-73	0			NA	NA	0	0	NA	NA	0	0	0	NA	NA	NA	N/A	N/A	N/A	N/A	N/A	NA	0	NA	0	0	0	0	2	0			8.14625						6.68386				58.923	540	5.0056e-122	6.1
438	CON__Q3SX09;CON__P02070			>Q3SX09 TREMBL:Q3SX09 (Bos taurus) similar to HBG protein;>P02070 SWISS-PROT:P02070 (Bos taurus) Hemoglobin subunit beta	0			NA	NA	0	0	NA	NA	0	0	0	NA	NA	NA	N/A	N/A	N/A	N/A	N/A	NA	0	NA	1	0	0	2	3	0		6.51056	6.97175	8.64276				4.97162	5.97175	7.00805			22.06	201;145	1.9756e-12	7.5
439	CON__Q3SX14			>Q3SX14 TREMBL:Q3SX14 (Bos taurus) Similar to Gelsolin	0			NA	NA	0	0	NA	NA	0	0	0	NA	NA	NA	N/A	N/A	N/A	N/A	N/A	NA	0	NA	0	0	0	0	6	0			8.9954						7.46392				85.686	781	2.4053e-50	0
440	CON__Q3SX28			>Q3SX28 TREMBL:Q3SX28;Q5KR48 (Bos taurus) Tropomyosin 2	0			NA	NA	0	0	NA	NA	0	0	0	NA	NA	NA	N/A	N/A	N/A	N/A	N/A	NA	0	NA	1	0	0	2	6	0		8.20951	8.6151	8.43676				6.3258	7.41098	6.61305			33.012	284	1.3182e-21	5.6
441	CON__Q3SY84			>Q3SY84 SWISS-PROT:Q3SY84 Tax_Id=9606 Gene_Symbol=KRT71 Keratin, type II cytoskeletal 71	0			NA	32.3654	0	0	NA	NA	0	0	0	NA	NA	NA	N/A	N/A	N/A	N/A	N/A	NA	0	NA	1	1	0	1	2	1	8.79601	8.90171	10.1878	9.23854		7.33246	7.30464	6.67345	8.69644	7.06871		5.8411	57.249	523	2.226e-106	6.3
442	CON__Q3SZR3			>Q3SZR3 SWISS-PROT:Q3SZR3 (Bos taurus) Alpha-1-acid glycoprotein precursor	0			NA	NA	0	0	NA	NA	0	0	0	NA	NA	NA	N/A	N/A	N/A	N/A	N/A	NA	0	NA	0	0	0	1	4	0			7.94092	7.71795					6.86174	6.07196			23.182	202	8.5408e-18	0
443	CON__Q9Z2K1;CON__Q3ZAW8			>Q9Z2K1 SWISS-PROT:Q9Z2K1 Tax_Id=10090 Gene_Symbol=Krt16 Keratin, type I cytoskeletal 16;>Q3ZAW8 TREMBL:Q3ZAW8;Q9EQD6;Q9EQD7 Tax_Id=10090 Gene_Symbol=Krt16 Keratin intermediate filament 16a	0			NA	NA	0	0	NA	NA	0	0	0	NA	NA	NA	N/A	N/A	N/A	N/A	N/A	NA	0	NA	0	0	0	0	1	0			6.73118						5.25406				51.606	469;474	0	17.1
444	CON__Q3ZBD7			>Q3ZBD7 SWISS-PROT:Q3ZBD7 (Bos taurus) Glucose-6-phosphate isomerase	0			NA	NA	0	0	NA	NA	0	0	0	NA	NA	NA	N/A	N/A	N/A	N/A	N/A	NA	0	NA	0	0	0	0	3	0			8.48372						7.05235				62.87	557	2.7063e-114	0
445	CON__Q58D62			>Q58D62 SWISS-PROT:Q58D62 (Bos taurus) Fetuin-B precursor	0			NA	NA	0	0	NA	NA	0	0	0	NA	NA	NA	N/A	N/A	N/A	N/A	N/A	NA	0	NA	0	0	0	0	2	0			6.89131						5.63604				42.663	387	7.5859e-05	0
446	CON__Q5D862			>Q5D862 SWISS-PROT:Q5D862 Tax_Id=9606 Gene_Symbol=FLG2 Filaggrin-2	0			NA	4.51334	0	0	NA	NA	0	0	0	NA	NA	NA	N/A	N/A	N/A	N/A	N/A	NA	0	NA	2	6	0	2	18	1	8.703	8.38447	9.25763	8.57614		7.57427	6.83377	5.82118	7.38839	6.07708		5.70505	248.07	2391	0	0.8
447	CON__Q5XKE5			>Q5XKE5 SWISS-PROT:Q5XKE5 Tax_Id=9606 Gene_Symbol=KRT79 Keratin, type II cytoskeletal 79	0			NA	NA	0	0	NA	NA	0	0	0	NA	NA	NA	N/A	N/A	N/A	N/A	N/A	NA	0	NA	0	5	0	0	4	0	7.76178		7.32261				6.31463		5.87545				57.809	535	8.8975e-294	9.9
448	CON__Q5XQN5			>Q5XQN5 SWISS-PROT:Q5XQN5 (Bos taurus) Keratin, type II cytoskeletal 5	0			NA	NA	0	0	NA	NA	0	0	0	NA	NA	NA	N/A	N/A	N/A	N/A	N/A	NA	0	NA	0	0	0	0	1	0			6.88515						5.39379				62.936	601	0	26.1
449	CON__Q61782			>Q61782 TREMBL:Q61782 Tax_Id=10090 Gene_Symbol=Krt14 Type I epidermal keratin (Fragment)	0			NA	NA	0	0	NA	NA	0	0	0	NA	NA	NA	N/A	N/A	N/A	N/A	N/A	NA	0	NA	1	1	0	0	1	0	7.2997	7.49116	8.37751				6.52154	6.0929	7.59936				10.662	93	0	23.7
450	CON__Q6IFX2;CON__P35900;CON__Q9D312			>Q6IFX2 SWISS-PROT:Q6IFX2 Tax_Id=10090 Gene_Symbol=Krt42 Keratin, type I cytoskeletal 42	0			0	0	0	0	NA	NA	0	0	0	NA	NA	NA	N/A	N/A	N/A	N/A	N/A	NA	0	NA	0	0	2	0	2	1			7.91632		8.783	8.5676			6.45391		7.3206	7.1052	50.133	452;424;431	0	25
451	CON__Q6KB66-1;CON__Q0VBK2			>Q6KB66-1 SWISS-PROT:Q6KB66-1 Tax_Id=9606 Gene_Symbol=KRT80 Isoform 1 of Keratin, type II cytoskeletal 80	0			NA	NA	0	0	NA	NA	0	0	0	NA	NA	NA	N/A	N/A	N/A	N/A	N/A	NA	0	NA	0	2	0	0	19	0	7.49987		9.50068				5.98135		7.98216				50.525	452;452	9.2111e-237	0
452	CON__Q8N1N4-2;CON__Q7RTT2			>Q8N1N4-2 SWISS-PROT:Q8N1N4-2 Tax_Id=9606 Gene_Symbol=KRT78 Isoform 2 of Keratin, type II cytoskeletal 78;>Q7RTT2 TREMBL:Q7RTT2 Tax_Id=9606 Gene_Symbol=KRT78 Keratin-78	0			NA	NA	0	0	NA	NA	0	0	0	NA	NA	NA	N/A	N/A	N/A	N/A	N/A	NA	0	NA	2	7	0	2	25	0	8.11471	7.35476	9.82249	8.19986			6.65232	5.28353	8.3601	6.13529			56.964	521;521	0	4.4
453	CON__Q7Z3Y7			>Q7Z3Y7 SWISS-PROT:Q7Z3Y7 Tax_Id=9606 Gene_Symbol=KRT28 Keratin 25D	0			NA	NA	0	0	NA	NA	0	0	0	NA	NA	NA	N/A	N/A	N/A	N/A	N/A	NA	0	NA	0	0	0	0	4	0			7.62335						6.17621				53.025	486	2.7159e-135	5.3
454	CON__Q7Z3Y8			>Q7Z3Y8 SWISS-PROT:Q7Z3Y8 Tax_Id=9606 Gene_Symbol=KRT27 Keratin, type I cytoskeletal 27	0			0	NA	0	0	NA	NA	0	0	0	NA	NA	NA	N/A	N/A	N/A	N/A	N/A	NA	0	NA	0	3	1	0	4	0	7.56358		7.89471		8.71693		6.16563		6.49676		7.31898		49.823	459	4.9175e-42	3.9
455	CON__Q7Z3Z0			>Q7Z3Z0 SWISS-PROT:Q7Z3Z0 Tax_Id=9606 Gene_Symbol=KRT25 Keratin, type I cytoskeletal 25	0			NA	NA	0	0	NA	NA	0	0	0	NA	NA	NA	N/A	N/A	N/A	N/A	N/A	NA	0	NA	0	0	0	0	1	0			6.62469						5.26297				49.317	450	1.5841e-35	4
456	CON__Q7Z794			>Q7Z794 SWISS-PROT:Q7Z794 Tax_Id=9606 Gene_Symbol=KRT77 Keratin 77	0			NA	NA	0	0	NA	NA	0	0	0	NA	NA	NA	N/A	N/A	N/A	N/A	N/A	NA	0	NA	3	5	0	2	13	0	8.00329	7.19839	8.49923	8.37908			6.51192	5.11116	7.00788	6.27238			61.802	578	6.7384e-252	9.7
457	CON__Q86YZ3			>Q86YZ3 SWISS-PROT:Q86YZ3 Tax_Id=9606 Gene_Symbol=HRNR Hornerin	0			NA	NA	0	0	NA	NA	0	0	0	NA	NA	NA	N/A	N/A	N/A	N/A	N/A	NA	0	NA	1	8	0	2	24	0	9.24391	6.92776	10.2782	8.72786			7.3145	4.42487	8.34875	6.15746			282.39	2850	0	1.5
458	CON__Q8BGZ7			>Q8BGZ7 TREMBL:Q8BGZ7;Q99MH7 Tax_Id=10090 Gene_Symbol=Krt75 10 days neonate skin cDNA, RIKEN full-length enriched library, clone:4732475I03 product:CYTOKERATIN homolog	0			NA	NA	0	0	NA	NA	0	0	0	NA	NA	NA	N/A	N/A	N/A	N/A	N/A	NA	0	NA	0	0	0	0	5	0			8.22518						6.73381				59.74	551	0	9.4
459	CON__Q8VED5			>Q8VED5 TREMBL:Q8VED5 Tax_Id=10090 Gene_Symbol=Krt79 Keratin 79	0			NA	NA	0	0	NA	NA	0	0	0	NA	NA	NA	N/A	N/A	N/A	N/A	N/A	NA	0	NA	0	0	0	0	1	0			6.59779						5.15063				57.552	531	0	5.8
460	CON__Q922U2;CON__REFSEQ:XP_932229			>Q922U2 SWISS-PROT:Q922U2 Tax_Id=10090 Gene_Symbol=Krt5 Keratin, type II cytoskeletal 5	0			NA	NA	0	0	NA	NA	0	0	0	NA	NA	NA	N/A	N/A	N/A	N/A	N/A	NA	0	NA	0	0	0	0	2	0			9.76356						8.28643				61.766	580;345	0	19.8
461	CON__Q92764			>Q92764 SWISS-PROT:Q92764 Keratin, type I cuticular HA5 (Hair keratin, type I HA5)	0			NA	NA	0	0	NA	NA	0	0	0	NA	NA	NA	N/A	N/A	N/A	N/A	N/A	NA	0	NA	2	0	0	0	0	0		7.76318						5.68917					47.596	425	1.7986e-22	8.2
462	CON__Q9C075			>Q9C075 SWISS-PROT:Q9C075 Tax_Id=9606 Gene_Symbol=KRT23 Keratin, type I cytoskeletal 23	0			NA	NA	0	0	NA	NA	0	0	0	NA	NA	NA	N/A	N/A	N/A	N/A	N/A	NA	0	NA	0	0	0	0	14	0			8.89526						7.46389				48.131	422	2.3885e-90	0
463	CON__Q9QWL7;CON__Q99PS0			>Q9QWL7 SWISS-PROT:Q9QWL7 Tax_Id=10090 Gene_Symbol=Krt17 Keratin, type I cytoskeletal 17	0			NA	NA	0	0	NA	NA	0	0	0	NA	NA	NA	N/A	N/A	N/A	N/A	N/A	NA	0	NA	0	0	0	0	2	0			7.93806						6.4909				48.161	433;422	0	23.3
464	CON__Q9R0H5			>Q9R0H5 SWISS-PROT:Q9R0H5 Tax_Id=10090 Gene_Symbol=Krt71 Keratin, type II cytoskeletal 6G	0			NA	NA	0	0	NA	NA	0	0	0	NA	NA	NA	N/A	N/A	N/A	N/A	N/A	NA	0	NA	0	0	0	1	8	0			7.7793	7.35684					6.28794	5.32521			57.382	524	6.9374e-221	6.3
465	CON__Streptavidin			>Streptavidin (S.avidinii)	0			7.29581	7.75397	0	0	NA	NA	0	0	0	NA	NA	NA	N/A	N/A	N/A	N/A	N/A	NA	0	NA	3	3	3	6	5	5	8.96487	9.02146	9.26482	11.0061	8.98452	9.59075	8.18673	7.49651	8.48667	9.41966	8.20637	8.81261	16.622	160	0	30
466	Q9W092;D0IQG7	Probable chitinase 2	Cht2;Cht2-RA	>sp|Q9W092|CHIT2_DROME Probable chitinase 2 OS=Drosophila melanogaster GN=Cht2 PE=1 SV=1;>tr|D0IQG7|D0IQG7_DROME Chitinase 2, isoform B OS=Drosophila melanogaster GN=Cht2 PE=2 SV=1	0		Both	0	0	0	0	NA	NA	0	0	0	NA	NA	NA	N/A	N/A	N/A	N/A	N/A	5.51	0	NA	0	0	4	0	0	6					7.85937	8.32071					6.47916	6.9405	54.122	484;484	3.6065e-21	0
467	Q960V3-4;D0Z747;Q960V3-2;E2QCQ3;Q960V3;M9NDH7	Trafficking kinesin-binding protein milt	milt-RB;milt	>sp|Q960V3-4|MILT_DROME Isoform D of Trafficking kinesin-binding protein milt OS=Drosophila melanogaster GN=milt;>tr|D0Z747|D0Z747_DROME Milton, isoform E OS=Drosophila melanogaster GN=milt PE=2 SV=1;>sp|Q960V3-2|MILT_DROME Isoform A of Trafficking kinesin	0		Both	0	0	0	0	NA	NA	0	0	0	NA	NA	NA	N/A	N/A	N/A	N/A	N/A	5.45	0	NA	0	0	2	0	0	3					7.2634	7.70931					5.62992	6.07584	105.15	979;979;1116;1116;1122;1256	3.5088e-10	0
468	Q9VZS5;D1Z3A1	60S ribosomal protein L28	RpL28	>sp|Q9VZS5|RL28_DROME 60S ribosomal protein L28 OS=Drosophila melanogaster GN=RpL28 PE=1 SV=1;>tr|D1Z3A1|D1Z3A1_DROME MIP15344p OS=Drosophila melanogaster GN=RpL28 PE=2 SV=1	0	254nm (YW) unique	Both	0.0548617	0.160065	0	1	Ribosomal_L28e	1	1	1	1	1	0	0	0	0	1	0	0	11.09	1	NA	1	2	16	5	0	7	7.71965	8.46504		8.65939	10.598	9.10161	6.81657	6.86121		7.12034	9.69487	8.19852	16.029	144;144;216	0	7.6
469	Q9U3Z7;D2NUK9	NHP2-like protein 1 homolog	hoip;hoip-RA	>sp|Q9U3Z7|NH2L1_DROME NHP2-like protein 1 homolog OS=Drosophila melanogaster GN=hoip PE=2 SV=1;>tr|D2NUK9|D2NUK9_DROME Hoi-polloi, isoform B OS=Drosophila melanogaster GN=hoip PE=2 SV=1	0	254nm (YW) unique	Both	0	0.0112632	1	1	Ribosomal_L7Ae	1	1	1	1	1	1	1	1	1	1	0	0	6.57	1	NA	0	0	9	4	0	8				8.34376	9.88682	9.96181				6.82792	8.98373	9.05873	13.883	127;127	0	0
470	M9PCR4;Q9VUY8;D3DMJ6	WASH complex subunit strumpellin homolog	CG12272;CG12272-RA	>tr|M9PCR4|M9PCR4_DROME CG12272, isoform C OS=Drosophila melanogaster GN=CG12272 PE=4 SV=1;>sp|Q9VUY8|STRUM_DROME WASH complex subunit strumpellin homolog OS=Drosophila melanogaster GN=CG12272 PE=2 SV=1;>tr|D3DMJ6|D3DMJ6_DROME CG12272, isoform B OS=Drosoph	0		365nm (X490) unique	0	NA	0	0	NA	NA	0	0	0	NA	NA	NA	N/A	N/A	N/A	N/A	N/A	6.18	0	NA	0	0	4	0	0	0					7.77939						5.97321		134.44	1167;1191;1191	8.3266e-11	0
471	M9PF42;Q9VLT9;M9NEC0;D3DML3		Cka;Cka-RB	>tr|M9PF42|M9PF42_DROME Connector of kinase to AP-1, isoform G OS=Drosophila melanogaster GN=Cka PE=4 SV=1;>tr|Q9VLT9|Q9VLT9_DROME Connector of kinase to AP-1, isoform A OS=Drosophila melanogaster GN=Cka PE=2 SV=2;>tr|M9NEC0|M9NEC0_DROME Connector of kinas	0		Both	0	0	0	0	NA	NA	0	0	0	NA	NA	NA	N/A	N/A	N/A	N/A	N/A	4.94	0	NA	0	0	9	0	0	6					9.12581	8.66554					7.82479	7.36451	77.105	722;730;747;749	6.9435e-111	0
472	Q9VIX3;Q8INW7;D3DMM0;Q9VIX2;Q2PDT4;Q966T5		Pax;Pax-RA	>tr|Q9VIX3|Q9VIX3_DROME Paxillin, isoform B OS=Drosophila melanogaster GN=Pax PE=4 SV=2;>tr|Q8INW7|Q8INW7_DROME FI11475p OS=Drosophila melanogaster GN=Pax PE=2 SV=1;>tr|D3DMM0|D3DMM0_DROME MIP15702p OS=Drosophila melanogaster GN=Pax PE=2 SV=1;>tr|Q9VIX2|Q9	0		Both	0	0	0	0	NA	NA	0	0	0	NA	NA	NA	N/A	N/A	N/A	N/A	N/A	6.22	0	NA	0	0	5	0	0	4					8.25653	8.16894					6.7794	6.69181	61.901	556;557;563;581;581;197	2.5865e-25	0
473	P10735;D3DMP8	40S ribosomal protein S12, mitochondrial	tko	>sp|P10735|RT12_DROME 40S ribosomal protein S12, mitochondrial OS=Drosophila melanogaster GN=tko PE=1 SV=1;>tr|D3DMP8|D3DMP8_DROME MIP16231p OS=Drosophila melanogaster GN=tko PE=2 SV=1	0	254nm (YW) unique	Both	0.727387	271.396	0	1	Ribosom_S12_S23	1	1	1	1	0	1	0	0	0	0	0	0	10.75	1	NA	1	0	2	4	0	1		7.13422		9.92008	8.25481	7.04044		5.7655		8.41342	7.47666	6.26228	15.532	140;154	6.5101e-69	7.1
474	D3PFF6;Q9VPC0	Serine/threonine-protein kinase PITSLRE	Pitslre-RC;Pitslre	>tr|D3PFF6|D3PFF6_DROME GH16248p OS=Drosophila melanogaster GN=Pitslre PE=2 SV=1;>sp|Q9VPC0|KP58_DROME Serine/threonine-protein kinase PITSLRE OS=Drosophila melanogaster GN=Pitslre PE=1 SV=1	0	254nm (YW) unique	Both	0.888423	0.15802	0	0	NA	NA	0	0	0	0	1	0	1	0	0	1	0	7.97	0	NA	1	0	7	2	1	9		7.5191	6.29254	8.13267	8.52098	8.61919		5.26321	4.65908	5.90195	6.88752	6.98571	88.798	778;952	2.6948e-32	1.3
475	Q9VV51;D5AEK7;Q961F9			>tr|Q9VV51|Q9VV51_DROME CG4729, isoform A OS=Drosophila melanogaster GN=CG4729 PE=2 SV=1;>tr|D5AEK7|D5AEK7_DROME CG4729, isoform E OS=Drosophila melanogaster GN=CG4729 PE=2 SV=1;>tr|Q961F9|Q961F9_DROME CG4729, isoform D OS=Drosophila melanogaster GN=CG4729	0		Both	0	0	0	0	NA	NA	0	0	0	NA	NA	NA	N/A	N/A	N/A	N/A	N/A	9.24	0	NA	0	0	8	0	0	1					8.8657	7.36074					7.61044	6.10548	44.397	386;397;143	1.2344e-61	0
476	Q8IQG1-4;Q8IQG1-3;D6W4U9;Q8IQG1;Q8IQG1-2	MOB kinase activator-like 2	Mob2-RB;Mob2	>sp|Q8IQG1-4|MOB2_DROME Isoform C of MOB kinase activator-like 2 OS=Drosophila melanogaster GN=Mob2;>sp|Q8IQG1-3|MOB2_DROME Isoform B of MOB kinase activator-like 2 OS=Drosophila melanogaster GN=Mob2;>tr|D6W4U9|D6W4U9_DROME Mob2, isoform E OS=Drosophila me	0		Both	0	0	0	0	NA	NA	0	0	0	NA	NA	NA	N/A	N/A	N/A	N/A	N/A	6.35	0	NA	0	0	3	0	0	3					7.93989	8.30726					6.86072	7.22809	45.817	431;537;537;566;728	8.0595e-09	0
477	D6W4V3;Q9VZK1		CG14985-RB	>tr|D6W4V3|D6W4V3_DROME CG14985, isoform C OS=Drosophila melanogaster GN=CG14985-RB PE=2 SV=1;>tr|Q9VZK1|Q9VZK1_DROME CG14985, isoform B OS=Drosophila melanogaster GN=CG14985-RB PE=2 SV=3	0	254nm (YW) unique	Both	0	9.13088	0	0	NA	NA	0	0	0	0	0	0	0	0	0	0	0	5.11	0	NA	0	0	1	2	0	2				8.15902	7.74023	6.8818				6.6056	6.78598	5.92756	22.079	190;241	7.7419e-08	0
478	Q9VQP9;E0R7Q5	Putative oligosaccharyltransferase complex subunit CG9662	CG9662;CG9662-RA	>sp|Q9VQP9|OSTC_DROME Putative oligosaccharyltransferase complex subunit CG9662 OS=Drosophila melanogaster GN=CG9662 PE=2 SV=3;>tr|E0R7Q5|E0R7Q5_DROME CG9662, isoform B OS=Drosophila melanogaster GN=CG9662-RA PE=2 SV=1	0		Both	0	0	0	0	NA	NA	0	0	0	NA	NA	NA	N/A	N/A	N/A	N/A	N/A	9.1	0	NA	0	0	2	0	0	1					7.95669	7.62354					7.35463	7.02148	16.823	149;149	1.3839e-08	0
479	P25159-2;E1JGK6;P25159	Maternal effect protein staufen	stau	>sp|P25159-2|STAU_DROME Isoform B of Maternal effect protein staufen OS=Drosophila melanogaster GN=stau;>tr|E1JGK6|E1JGK6_DROME Staufen, isoform C OS=Drosophila melanogaster GN=stau PE=4 SV=1;>sp|P25159|STAU_DROME Maternal effect protein staufen OS=Drosoph	0	Both	Both	86.5015	15.1621	1	1	dsrm	4	1	1	1	1	1	0	0	0	1	0	0	9.14	0	NA	6	0	3	9	2	4		8.89882	7.1262	9.71164	7.79806	8.10013		6.65702	5.62105	7.49328	6.29292	6.59499	98.028	914;1025;1026	1.1214e-80	6.9
480	Q7KRI2;E1JGK7;Q9VD04;Q9VD05	Longitudinals lacking protein-like	lolal	>sp|Q7KRI2|LOLAL_DROME Longitudinals lacking protein-like OS=Drosophila melanogaster GN=lolal PE=1 SV=1;>tr|E1JGK7|E1JGK7_DROME Lola like, isoform E OS=Drosophila melanogaster GN=lolal PE=4 SV=1	0		Both	0	0	0	0	NA	NA	0	0	1	NA	NA	NA	N/A	N/A	N/A	N/A	N/A	6.9	0	maybe	0	0	7	0	0	9					8.90927	9.53375					8.06416	8.68865	14.489	127;127;596;681	9.7139e-83	0
481	E1JGK8			>tr|E1JGK8|E1JGK8_DROME CG42518, isoform A OS=Drosophila melanogaster GN=CG42518 PE=4 SV=1	0		Both	0	0	0	0	NA	NA	0	0	0	NA	NA	NA	N/A	N/A	N/A	N/A	N/A	10.22	0	NA	0	0	1	0	0	1					7.80791	8.01284					7.02975	7.23469	10.19	85	0.00046045	0
482	Q9N693;E1JGL0;Q9NBW0;A1ZB51		sbb	>tr|Q9N693|Q9N693_DROME Brakeless-B OS=Drosophila melanogaster GN=sbb PE=2 SV=1;>tr|E1JGL0|E1JGL0_DROME Scribbler, isoform G OS=Drosophila melanogaster GN=sbb PE=4 SV=1	0		Both	0	0	0	0	NA	NA	0	0	1	NA	NA	NA	N/A	N/A	N/A	N/A	N/A	9.26	0	yes	0	0	5	0	0	2					8.18862	7.83933					6.47262	6.12333	230.01	2302;2312;929;939	1.8944e-21	0
483	E1JGN7;A1ZBW4		bl	>tr|E1JGN7|E1JGN7_DROME Bancal, isoform E OS=Drosophila melanogaster GN=bl PE=4 SV=1	0			NA	YW whole not available	1	1	KH_1	3	1	1	1	NA	NA	NA	N/A	N/A	N/A	N/A	N/A	8.44	0	NA	0	0	0	1	0	0				8.14101						6.26439			49.872	493;315	0	29
484	P28750;E1JGN9	Maternal protein exuperantia	exu	>sp|P28750|EXU_DROME Maternal protein exuperantia OS=Drosophila melanogaster GN=exu PE=1 SV=2;>tr|E1JGN9|E1JGN9_DROME AT02443p OS=Drosophila melanogaster GN=exu PE=2 SV=1	0	Both		X490 whole not available	YW whole not available	1	0	NA	NA	1	0	1	0	0	0	0	0	0	0	0	9.55	0	NA	3	1	0	9	2	0	6.98973	8.2062	6.97755	9.40177			5.6473	6.18446	5.63512	7.3689			57.974	532;532	7.4887e-36	5.3
485	E1JGP0;P53501;P45891	Actin-57B	Act57B	>tr|E1JGP0|E1JGP0_DROME Actin 57B, isoform C OS=Drosophila melanogaster GN=Act57B PE=2 SV=1;>sp|P53501|ACT3_DROME Actin-57B OS=Drosophila melanogaster GN=Act57B PE=1 SV=1	0		Both	0	0	0	0	NA	NA	0	0	0	NA	NA	NA	N/A	N/A	N/A	N/A	N/A	5.56	0	NA	0	0	2	0	0	2					8.53138	8.7669					7.25261	7.48814	40.258	360;376;376	0	25
486	Q7KVP4;Q86BS7;E1JGQ5;Q9W2H8			>tr|Q7KVP4|Q7KVP4_DROME CG9485, isoform A OS=Drosophila melanogaster GN=CG9485 PE=4 SV=1;>tr|Q86BS7|Q86BS7_DROME CG9485, isoform C OS=Drosophila melanogaster GN=CG9485 PE=4 SV=1;>tr|E1JGQ5|E1JGQ5_DROME CG9485, isoform D OS=Drosophila melanogaster GN=CG9485	0	365nm (X490) unique	365nm (X490) unique	0.048529	NA	0	0	NA	NA	0	0	0	0	0	0	0	0	0	0	0	6.02	0	NA	2	0	35	0	0	0		7.29084			9.57424			4.81224			7.69917		173.58	1542;1546;1563;1629	1.0306e-198	2
487	E1JGR4			>tr|E1JGR4|E1JGR4_DROME CG42496 OS=Drosophila melanogaster GN=CG42496-RA PE=4 SV=1	0		Both	0	0	0	0	NA	NA	0	0	0	NA	NA	NA	N/A	N/A	N/A	N/A	N/A	8.36	0	NA	0	0	3	0	0	4					7.87541	8.68536					6.97232	7.78226	10.946	94	1.2885e-11	0
488	O44081;E1JGV6;O44081-2	H/ACA ribonucleoprotein complex subunit 4	Nop60B	>sp|O44081|DKC1_DROME H/ACA ribonucleoprotein complex subunit 4 OS=Drosophila melanogaster GN=Nop60B PE=1 SV=1;>tr|E1JGV6|E1JGV6_DROME Nucleolar protein at 60B, isoform C OS=Drosophila melanogaster GN=Nop60B PE=4 SV=1;>sp|O44081-2|DKC1_DROME Isoform C of H	0	Both	Both	0.673725	6.28993	1	1	DKCLD;PUA;TruB_N	1;1;1	1	1	1	1	0	1	1	1	0	1	1	9.33	0	NA	2	0	14	13	0	10		8.11518		10.0632	9.18786	8.80797		5.981		7.86174	7.72545	7.34557	56.83	508;508;253	1.0681e-175	5.3
489	P32865;E1JGX2	G protein-coupled receptor kinase 1	Gprk1	>sp|P32865|GPRK1_DROME G protein-coupled receptor kinase 1 OS=Drosophila melanogaster GN=Gprk1 PE=2 SV=2;>tr|E1JGX2|E1JGX2_DROME G protein-coupled receptor kinase 1, isoform B OS=Drosophila melanogaster GN=Gprk1 PE=3 SV=1	0		Both	0	9.1456	0	0	NA	NA	0	0	0	NA	NA	NA	N/A	N/A	N/A	N/A	N/A	6.16	0	NA	0	0	8	1	0	1				7.77809	8.56611	6.52815				5.6271	6.98632	4.94836	80.566	700;700	2.9156e-34	0
490	E1JGX3;Q7PLI2	Nipped-B protein	Nipped-B	>tr|E1JGX3|E1JGX3_DROME Nipped-B, isoform G OS=Drosophila melanogaster GN=Nipped-B PE=4 SV=1;>sp|Q7PLI2|NIPB_DROME Nipped-B protein OS=Drosophila melanogaster GN=Nipped-B PE=1 SV=3	0	254nm (YW) unique	Both	0	0.760251	0	0	NA	NA	0	0	1	0	0	0	0	0	0	0	0	6.06	0	no	0	0	9	2	1	3			6.27948	8.13564	8.28957	7.9397			4.30177	5.56046	6.31186	5.96197	233.88	2053;2077	4.7841e-46	0
491	Q9XZJ4;E1JGZ9	Proteasome subunit alpha type-6;Proteasome subunit alpha type	Prosalpha1	>sp|Q9XZJ4|PSA6_DROME Proteasome subunit alpha type-6 OS=Drosophila melanogaster GN=Prosalpha1 PE=1 SV=2;>tr|E1JGZ9|E1JGZ9_DROME Proteasome subunit alpha type OS=Drosophila melanogaster GN=CG30382 PE=3 SV=1	0	Both	Both	0.159658	0.241724	0	0	NA	NA	0	1	0	0	0	0	1	1	0	0	0	7.55	0	NA	3	1	19	7	3	15	7.27386	8.8621	8.31012	9.76804	10.4982	9.94983	6.01858	6.87323	7.05484	7.7954	9.24296	8.69455	27.162	244;244	3.6773e-163	16.8
492	Q9V345;E1JH01	COP9 signalosome complex subunit 4	CSN4	>sp|Q9V345|CSN4_DROME COP9 signalosome complex subunit 4 OS=Drosophila melanogaster GN=CSN4 PE=1 SV=1;>tr|E1JH01|E1JH01_DROME COP9 complex homolog subunit 4, isoform B OS=Drosophila melanogaster GN=CSN4 PE=4 SV=1	0		Both	0.073452	0	0	0	NA	NA	0	0	0	NA	NA	NA	N/A	N/A	N/A	N/A	N/A	5.93	0	NA	1	0	20	0	0	22		7.69038			9.76069	9.80476		5.60661			8.31353	8.35759	46.473	407;407	1.3166e-252	2.9
493	Q86S05-3;E1JH02;Q86S05-2;Q86S05	Protein lingerer	lig	>sp|Q86S05-3|LIG_DROME Isoform B of Protein lingerer OS=Drosophila melanogaster GN=lig;>tr|E1JH02|E1JH02_DROME Lingerer, isoform E OS=Drosophila melanogaster GN=lig PE=4 SV=1;>sp|Q86S05-2|LIG_DROME Isoform A of Protein lingerer OS=Drosophila melanogaster G	0	Both	Both	4.33513	3.98917	0	0	NA	NA	0	1	0	1	1	1	0	0	1	0	0	5.96	0	NA	6	1	21	18	4	20	6.73011	9.7209	8.22866	11.0263	9.85213	9.89809	5.31515	7.50122	6.81369	8.80153	8.43715	8.48312	134.56	1332;1332;1343;1375	0	8.3
494	E1JH07			>tr|E1JH07|E1JH07_DROME CG42516, isoform A OS=Drosophila melanogaster GN=CG42516-RA PE=2 SV=1	0		254nm (YW) unique	NA	0	0	0	NA	NA	0	0	0	NA	NA	NA	N/A	N/A	N/A	N/A	N/A	4.72	0	yes	0	0	0	0	0	1						7.48789						6.58479	17.453	150	0.0002749	0
495	Q9V6L0;E1JH52	Probable lysine-specific demethylase 4B	Kdm4B	>sp|Q9V6L0|KDM4B_DROME Probable lysine-specific demethylase 4B OS=Drosophila melanogaster GN=Kdm4B PE=3 SV=3;>tr|E1JH52|E1JH52_DROME Histone demethylase 4B, isoform B OS=Drosophila melanogaster GN=Kdm4B PE=4 SV=1	0		365nm (X490) unique	0	NA	0	0	NA	NA	0	0	1	NA	NA	NA	N/A	N/A	N/A	N/A	N/A	7.14	0	maybe	0	0	3	0	0	0					7.78024						6.38231		66.436	590;590	6.8526e-08	0
496	Q7K3L1;E1JH57	Guanylate kinase-associated protein mars	mars	>sp|Q7K3L1|MARS_DROME Guanylate kinase-associated protein mars OS=Drosophila melanogaster GN=mars PE=1 SV=1;>tr|E1JH57|E1JH57_DROME Mars, isoform B OS=Drosophila melanogaster GN=mars PE=4 SV=1	0		Both	0	0	0	0	NA	NA	0	0	0	NA	NA	NA	N/A	N/A	N/A	N/A	N/A	9.99	0	NA	0	0	9	0	0	5					8.39289	7.93618					6.7027	6.24598	101.94	921;921	2.4553e-24	0
497	Q7K3B9;E1JH71	Methyltransferase-like protein 16 homolog	CG7544	>sp|Q7K3B9|MET16_DROME Methyltransferase-like protein 16 homolog OS=Drosophila melanogaster GN=CG7544 PE=2 SV=1;>tr|E1JH71|E1JH71_DROME CG7544, isoform B OS=Drosophila melanogaster GN=CG7544 PE=4 SV=1	0	254nm (YW) unique		NA	YW whole not available	0	0	NA	NA	0	0	1	1	1	1	0	0	0	0	0	8.13	0	NA	0	0	0	3	0	0				8.01596						6.25118			35.146	305;305	6.2765e-26	0
498	E1JH76;Q9BJZ5-3;Q9BJZ5;E2QCE8;Q9BJZ5-2;Q9BJZ5-4	RNA-binding protein fusilli	fus	>tr|E1JH76|E1JH76_DROME Fusilli, isoform G OS=Drosophila melanogaster GN=fus PE=4 SV=1;>sp|Q9BJZ5-3|FUSIL_DROME Isoform C of RNA-binding protein fusilli OS=Drosophila melanogaster GN=fus;>sp|Q9BJZ5|FUSIL_DROME RNA-binding protein fusilli OS=Drosophila mela	0	254nm (YW) unique		NA	YW whole not available	1	1	RRM_6	3	1	1	1	1	1	1	0	1	1	0	0	6.35	0	NA	0	1	0	14	0	0	6.61823			10.373			5.20325			8.19629			92.443	860;891;967;967;557;633	0	0
499	P48809;E1JHA4	Heterogeneous nuclear ribonucleoprotein 27C	Hrb27C	>sp|P48809|RB27C_DROME Heterogeneous nuclear ribonucleoprotein 27C OS=Drosophila melanogaster GN=Hrb27C PE=1 SV=2;>tr|E1JHA4|E1JHA4_DROME Heterogeneous nuclear ribonucleoprotein at 27C, isoform D OS=Drosophila melanogaster GN=Hrb27C PE=4 SV=1	0	Both	Both	28.2459	89.4033	1	1	RRM_1	2	1	1	1	1	1	1	1	0	1	1	1	6.33	0	no	8	11	13	22	13	12	9.29508	10.9295	9.61524	12.5075	10.1467	9.92013	8.18113	8.91077	8.50131	10.4751	9.03274	8.80619	44.769	421;421	0	31.6
500	E1JHE1;Q9VKW4		Klp31E	>tr|E1JHE1|E1JHE1_DROME Klp31E, isoform E OS=Drosophila melanogaster GN=Klp31E PE=3 SV=1;>tr|Q9VKW4|Q9VKW4_DROME Klp31E, isoform A OS=Drosophila melanogaster GN=Klp31E PE=2 SV=2	0		Both	0	0	0	0	NA	NA	0	0	0	NA	NA	NA	N/A	N/A	N/A	N/A	N/A	6.61	0	NA	0	0	1	0	0	3					6.91174	8.06733					5.17935	6.33496	118.96	1047;1048	6.4729e-08	0
501	Q9VKU1;E1JHE4		Fatp	>tr|Q9VKU1|Q9VKU1_DROME Fatty acid (Long chain) transport protein, isoform A OS=Drosophila melanogaster GN=Fatp PE=2 SV=2;>tr|E1JHE4|E1JHE4_DROME Fatty acid (Long chain) transport protein, isoform D OS=Drosophila melanogaster GN=Fatp PE=4 SV=2	0		365nm (X490) unique	0	NA	0	0	NA	NA	0	0	0	NA	NA	NA	N/A	N/A	N/A	N/A	N/A	8.93	0	NA	0	0	2	0	0	0					7.43941						5.8831		70.162	626;668	4.106e-05	0
502	E1JHJ9;Q9VJE5-2;Q9VJE5;M9PD36;E1JHK0;Q7KT48;Q9VJE5-3;M9PG37;B7YZW8;B7YZW7;Q0E8Q1;M9PBC9;M9PDB4;Q0E8Q0	Restin homolog	CLIP-190	>tr|E1JHJ9|E1JHJ9_DROME Cytoplasmic linker protein 190, isoform M OS=Drosophila melanogaster GN=CLIP-190 PE=4 SV=2;>sp|Q9VJE5-2|CL190_DROME Isoform B of Restin homolog OS=Drosophila melanogaster GN=CLIP-190;>sp|Q9VJE5|CL190_DROME Restin homolog OS=Drosophi	0		Both	0	0.00343086	0	0	NA	NA	0	0	0	NA	NA	NA	N/A	N/A	N/A	N/A	N/A	4.92	0	NA	0	1	25	1	0	41	8.13242			7.36428	8.8959	9.57053	6.1412			4.83223	6.90467	7.5793	186.67	1668;1689;1690;1690;1598;1623;1652;1601;1653;456;365;306;311;328	0	0
503	P15330-2;E1JHK3;P15330	Embryonic polarity protein dorsal	dl	>sp|P15330-2|DORS_DROME Isoform A of Embryonic polarity protein dorsal OS=Drosophila melanogaster GN=dl;>tr|E1JHK3|E1JHK3_DROME Dorsal, isoform D OS=Drosophila melanogaster GN=dl PE=2 SV=1;>sp|P15330|DORS_DROME Embryonic polarity protein dorsal OS=Drosophi	0	254nm (YW) unique	Both	0.763544	146.783	0	0	NA	NA	0	0	1	0	0	0	0	0	0	0	0	5.24	0	yes	1	0	7	3	0	1		7.50248		8.69479	8.57152	6.17205		5.539		6.71384	7.22909	4.82964	75.346	677;677;999	3.8281e-21	1.8
504	E1JHN2;Q9VIF3			>tr|E1JHN2|E1JHN2_DROME CG9249, isoform B OS=Drosophila melanogaster GN=CG9249 PE=4 SV=1;>tr|Q9VIF3|Q9VIF3_DROME CG9249, isoform A OS=Drosophila melanogaster GN=CG9249 PE=4 SV=3	0		Both	0	0	0	1	Methyltransf_31	1	1	0	0	NA	NA	NA	N/A	N/A	N/A	N/A	N/A	8.43	0	NA	0	0	1	0	0	2					7.55513	7.41145					6.32467	6.18099	32.058	289;310	2.3241e-27	0
505	E1JHP9;Q9VPI6;M9NCX9;E1JHQ0;C0PUZ0		galectin	>tr|E1JHP9|E1JHP9_DROME Galectin OS=Drosophila melanogaster GN=galectin PE=4 SV=1;>tr|Q9VPI6|Q9VPI6_DROME Galectin OS=Drosophila melanogaster GN=galectin PE=2 SV=1;>tr|M9NCX9|M9NCX9_DROME Galectin OS=Drosophila melanogaster GN=galectin PE=4 SV=1;>tr|E1JHQ0	0		365nm (X490) unique	0	NA	0	0	NA	NA	0	0	0	NA	NA	NA	N/A	N/A	N/A	N/A	N/A	5.38	0	NA	0	0	3	0	0	0					7.9077						6.56527		47.681	419;503;401;402;272	2.8048e-09	0
506	P20477;E1JHQ1	Glutamine synthetase 1, mitochondrial;Glutamine synthetase	Gs1	>sp|P20477|GLNA1_DROME Glutamine synthetase 1, mitochondrial OS=Drosophila melanogaster GN=Gs1 PE=2 SV=3;>tr|E1JHQ1|E1JHQ1_DROME Glutamine synthetase OS=Drosophila melanogaster GN=Gs1 PE=3 SV=1	0	365nm (X490) unique	Both	0.541289	0.0440105	0	0	NA	NA	0	0	0	0	0	0	1	0	0	0	0	5.46	0	NA	3	1	13	1	0	9	6.78919	8.81628		8.40966	9.92595	9.43099	5.6131	6.91036		6.61597	8.74986	8.25489	44.395	399;399	1.4283e-156	8.5
507	P15007-2;E1JHR5;P15007	Enolase	Eno	>sp|P15007-2|ENO_DROME Isoform A of Enolase OS=Drosophila melanogaster GN=Eno;>tr|E1JHR5|E1JHR5_DROME Enolase, isoform F OS=Drosophila melanogaster GN=Eno PE=3 SV=1;>sp|P15007|ENO_DROME Enolase OS=Drosophila melanogaster GN=Eno PE=1 SV=2	0	254nm (YW) unique	Both	0.036472	0.00443156	0	0	NA	NA	0	0	0	1	0	1	1	1	1	1	0	8.68	0	NA	4	6	29	7	4	29	8.17298	8.94511	7.44864	9.29671	11.2156	11.2499	6.83055	6.86221	6.10622	7.27154	9.87318	9.90745	46.662	433;433;500	0	13.6
508	M9PCK5;M9PC59;Q9VR35;E1JHT5			>tr|M9PCK5|M9PCK5_DROME CG2950, isoform F OS=Drosophila melanogaster GN=CG2950 PE=4 SV=1;>tr|M9PC59|M9PC59_DROME CG2950, isoform G OS=Drosophila melanogaster GN=CG2950 PE=4 SV=1;>tr|Q9VR35|Q9VR35_DROME CG2950, isoform A OS=Drosophila melanogaster GN=CG2950	0		Both	0	0.0225204	1	1	KH_1	1	1	0	1	NA	NA	NA	N/A	N/A	N/A	N/A	N/A	6	0	NA	0	1	1	1	0	2				7.3457	8.42203	8.73615				5.55097	7.16676	7.48087	67.335	629;631;653;775	9.9029e-07	0
509	E1JHT6;Q9VMV9;Q9VMW2;Q9VMW4		Rtnl1	>tr|E1JHT6|E1JHT6_DROME Reticulon-like protein OS=Drosophila melanogaster GN=Rtnl1 PE=4 SV=1;>tr|Q9VMV9|Q9VMV9_DROME Reticulon-like protein OS=Drosophila melanogaster GN=Rtnl1 PE=4 SV=2	0		Both	0	0	0	0	NA	NA	0	0	0	NA	NA	NA	N/A	N/A	N/A	N/A	N/A	4.72	0	NA	0	0	17	0	0	27					9.70892	10.28					8.32871	8.89977	65.443	607;595;202;222	0	0
510	Q9W0T1-4;E1JHV7;Q9W0T1-3;M9PBG5;Q9W0T1-2;M9PE12;Q9W0T1;E1JHV6;M9PDH1	Nucleosome-remodeling factor subunit NURF301	E(bx)	>sp|Q9W0T1-4|NU301_DROME Isoform D of Nucleosome-remodeling factor subunit NURF301 OS=Drosophila melanogaster GN=E(bx);>tr|E1JHV7|E1JHV7_DROME Enhancer of bithorax, isoform F OS=Drosophila melanogaster GN=E(bx) PE=4 SV=1;>sp|Q9W0T1-3|NU301_DROME Isoform C	0		Both	0.255171	0	0	0	NA	NA	0	0	1	NA	NA	NA	N/A	N/A	N/A	N/A	N/A	8.78	0	yes	1	0	14	0	0	6		6.9092			8.50335	8.4884		4.35499			6.52109	6.50613	239.45	2139;2139;2159;2163;2649;2668;2669;2669;2761	1.1834e-59	0.5
511	Q7K0L4;E1JHX5	WD repeat-containing protein 26 homolog	CG7611	>sp|Q7K0L4|WDR26_DROME WD repeat-containing protein 26 homolog OS=Drosophila melanogaster GN=CG7611 PE=1 SV=1;>tr|E1JHX5|E1JHX5_DROME CG7611, isoform B OS=Drosophila melanogaster GN=CG7611 PE=4 SV=1	0		Both	0	0	0	0	NA	NA	0	0	0	NA	NA	NA	N/A	N/A	N/A	N/A	N/A	5.34	0	NA	0	0	9	0	0	5					9.07441	8.04254					7.54292	6.51105	69.616	630;630	7.8419e-32	0
512	Q9VUH7;E1JI03		bmm	>tr|Q9VUH7|Q9VUH7_DROME Brummer, isoform A OS=Drosophila melanogaster GN=bmm PE=2 SV=1;>tr|E1JI03|E1JI03_DROME Brummer, isoform B OS=Drosophila melanogaster GN=bmm PE=4 SV=1	0		365nm (X490) unique	0	NA	0	0	NA	NA	0	0	0	NA	NA	NA	N/A	N/A	N/A	N/A	N/A	5.85	0	NA	0	0	5	0	0	0					7.87612						6.5539		57.227	507;553	5.1456e-18	0
513	Q9VVT2-2;E1JI19;Q9VVT2	Protein Im not dead yet	Indy	>sp|Q9VVT2-2|INDY1_DROME Isoform B of Protein Im not dead yet OS=Drosophila melanogaster GN=Indy;>tr|E1JI19|E1JI19_DROME Im not dead yet, isoform D OS=Drosophila melanogaster GN=Indy PE=4 SV=1;>sp|Q9VVT2|INDY1_DROME Protein Im not dead yet OS=Drosophila	0		365nm (X490) unique	0	NA	0	0	NA	NA	0	0	0	NA	NA	NA	N/A	N/A	N/A	N/A	N/A	8.76	0	NA	0	0	3	0	0	0					7.57822						6.40212		63.552	572;572;590	2.3802e-09	0
514	P42325;E1JI20	Neurocalcin homolog	Nca	>sp|P42325|NCAH_DROME Neurocalcin homolog OS=Drosophila melanogaster GN=Nca PE=1 SV=2;>tr|E1JI20|E1JI20_DROME Neurocalcin, isoform B OS=Drosophila melanogaster GN=Nca PE=4 SV=1	0		Both	0	0	0	0	NA	NA	0	0	0	NA	NA	NA	N/A	N/A	N/A	N/A	N/A	5.24	0	NA	0	0	7	0	0	9					8.54979	9.24817					7.40367	8.10206	21.894	190;190	7.0977e-36	0
515	Q9VWA1;E1JI22	Clathrin light chain	Clc	>sp|Q9VWA1|CLC_DROME Clathrin light chain OS=Drosophila melanogaster GN=Clc PE=2 SV=1;>tr|E1JI22|E1JI22_DROME Clathrin light chain, isoform B OS=Drosophila melanogaster GN=Clc PE=4 SV=1	0		Both	0	0	0	0	NA	NA	0	0	0	NA	NA	NA	N/A	N/A	N/A	N/A	N/A	4.73	0	NA	1	3	5	0	0	8	7.34778				8.95481	9.79757	6.44468				8.05173	8.89448	23.84	219;219	0	5.5
516	M9PIA6;O97159;E1JI46;Q59E34	Chromodomain-helicase-DNA-binding protein Mi-2 homolog	Mi-2	>tr|M9PIA6|M9PIA6_DROME Mi-2, isoform D OS=Drosophila melanogaster GN=Mi-2 PE=4 SV=1;>sp|O97159|CHDM_DROME Chromodomain-helicase-DNA-binding protein Mi-2 homolog OS=Drosophila melanogaster GN=Mi-2 PE=1 SV=2;>tr|E1JI46|E1JI46_DROME Mi-2, isoform C OS=Drosop	0	Both	Both	3.78781	0.628554	0	0	NA	NA	0	0	1	0	0	0	0	0	0	0	0	5.54	0	yes	10	3	38	15	14	19	7.17557	9.1515	8.08479	9.53883	9.38847	9.32245	5.22134	6.4397	6.13056	6.88406	7.43423	7.36819	223.13	1973;1982;1982;1983	7.6787e-278	6.9
517	E1JI58;Q9VP85		Sin	>tr|E1JI58|E1JI58_DROME Sex-lethal interactor, isoform C OS=Drosophila melanogaster GN=Sin PE=4 SV=2;>tr|Q9VP85|Q9VP85_DROME LD32951p OS=Drosophila melanogaster GN=Sin PE=2 SV=1	0		Both	0	0	0	0	NA	NA	0	0	1	NA	NA	NA	N/A	N/A	N/A	N/A	N/A	7.77	0	NA	0	0	1	0	0	2					6.1697	7.54259					4.72254	6.09541	54.878	485;486	8.6569e-05	0
518	E1JI64;Q9GQF1-2;M9PEG9;M9PEQ0;M9PHR0;M9PEH2;M9PEX9;E1JI66;M9PBV5;Q9GQF1	JNK-interacting protein 3	syd	>tr|E1JI64|E1JI64_DROME Sunday driver, isoform D OS=Drosophila melanogaster GN=syd PE=4 SV=1;>sp|Q9GQF1-2|JIP3_DROME Isoform B of JNK-interacting protein 3 OS=Drosophila melanogaster GN=syd;>tr|M9PEG9|M9PEG9_DROME Sunday driver, isoform E OS=Drosophila mel	0			NA	YW whole not available	0	0	NA	NA	0	0	0	NA	NA	NA	N/A	N/A	N/A	N/A	N/A	5.46	0	NA	0	0	0	1	0	0				9.53021						7.07445			132.49	1188;1194;1202;1205;1208;1211;1214;1215;1220;1227	0.0047983	0
519	Q9VZW2;E1JIB4		CG2162-RB	>tr|Q9VZW2|Q9VZW2_DROME CG2162, isoform A OS=Drosophila melanogaster GN=CG2162-RB PE=2 SV=1;>tr|E1JIB4|E1JIB4_DROME CG2162, isoform B OS=Drosophila melanogaster GN=CG2162 PE=4 SV=1	0		Both	8.93918	0.466587	0	1	R3H	1	1	1	0	NA	NA	NA	N/A	N/A	N/A	N/A	N/A	6.72	0	NA	1	0	1	1	0	3		6.63047		7.54855	6.70321	7.60774		4.66662		5.57922	5.28825	6.19276	58.061	535;671	6.3066e-16	2.1
520	M9PDU5;E1JIB9;Q7KV98;Q9W016;E1JIC0;M9MRU6;M9MRP8;M9NFH6;M9MRN5;M9MRZ4;Q8IRF0;Q9W013;M9MRQ1;M9NEY0		CG32306	>tr|M9PDU5|M9PDU5_DROME CG42669, isoform U OS=Drosophila melanogaster GN=CG33231 PE=4 SV=1;>tr|E1JIB9|E1JIB9_DROME CG42669, isoform E OS=Drosophila melanogaster GN=CG32306 PE=4 SV=1;>tr|Q7KV98|Q7KV98_DROME CG42669, isoform L OS=Drosophila melanogaster GN=C	0		Both	0	2.75955	0	0	NA	NA	0	0	0	NA	NA	NA	N/A	N/A	N/A	N/A	N/A	7.24	0	NA	0	0	3	1	0	4				8.50441	7.88797	7.7215				6.06032	6.06841	5.90195	164.25	1519;1702;1877;2223;1400;663;1446;1621;1967;2028;416;475;266;407	3.2003e-16	0
521	E1JIC9;O96881		TfIIEbeta	>tr|E1JIC9|E1JIC9_DROME Transcription factor IIEbeta, isoform B OS=Drosophila melanogaster GN=TfIIEbeta PE=4 SV=1;>tr|O96881|O96881_DROME IP01109p OS=Drosophila melanogaster GN=TfIIEbeta PE=2 SV=1	0	254nm (YW) unique	Both	15.9561	0.513358	0	0	NA	NA	0	0	1	1	0	0	0	0	0	0	0	9.27	0	no	1	0	4	2	0	2		8.19358		8.27886	7.88533	8.24291		6.40138		6.55693	6.77138	7.12898	28.505	249;292	1.1414e-15	4.8
522	E1JIE5;Q9VS49			>tr|E1JIE5|E1JIE5_DROME CG43780, isoform B OS=Drosophila melanogaster GN=CG43780 PE=4 SV=2;>tr|Q9VS49|Q9VS49_DROME CG43780, isoform A OS=Drosophila melanogaster GN=CG43780 PE=2 SV=1	0		254nm (YW) unique	NA	0	0	0	NA	NA	0	0	0	NA	NA	NA	N/A	N/A	N/A	N/A	N/A	6.66	0	NA	0	0	0	0	0	1						7.71525						7.11317	18.609	157;162	3.6495e-19	0
523	Q8IQF9;E1JIE7;Q9VTK7		CG6091-RG	>tr|Q8IQF9|Q8IQF9_DROME AT23158p OS=Drosophila melanogaster GN=CG6091 PE=2 SV=2;>tr|E1JIE7|E1JIE7_DROME CG6091, isoform G OS=Drosophila melanogaster GN=CG6091-RG PE=2 SV=1;>tr|Q9VTK7|Q9VTK7_DROME CG6091, isoform E OS=Drosophila melanogaster GN=CG6091 PE=2	0		365nm (X490) unique	0	NA	0	0	NA	NA	0	0	0	NA	NA	NA	N/A	N/A	N/A	N/A	N/A	5.42	0	NA	0	0	1	0	0	0					7.14339						5.82118		55.256	499;568;659	5.6395e-05	0
524	P29503-4;P29503-3;E1JIG1;P29503-2;P29503	Protein neuralized	neur	>sp|P29503-4|NEUR_DROME Isoform 4 of Protein neuralized OS=Drosophila melanogaster GN=neur;>sp|P29503-3|NEUR_DROME Isoform 3 of Protein neuralized OS=Drosophila melanogaster GN=neur;>tr|E1JIG1|E1JIG1_DROME Neuralized, isoform E OS=Drosophila melanogaster G	0		Both	0	0	0	0	NA	NA	0	0	0	NA	NA	NA	N/A	N/A	N/A	N/A	N/A	8.05	0	NA	0	0	1	0	0	2					7.7168	7.25758					6.41577	5.95656	72.624	671;672;672;753;754	1.9723e-09	0
525	E1JIG4;Q9VHG8			>tr|E1JIG4|E1JIG4_DROME CG16734, isoform B OS=Drosophila melanogaster GN=CG16734 PE=4 SV=1;>tr|Q9VHG8|Q9VHG8_DROME CG16734, isoform D OS=Drosophila melanogaster GN=CG16734 PE=4 SV=2	0		254nm (YW) unique	NA	0	0	0	NA	NA	0	0	0	NA	NA	NA	N/A	N/A	N/A	N/A	N/A	5.69	0	NA	0	0	0	0	0	1						6.94719						5.86801	23.741	204;443	0.00071367	0
526	Q961C3;Q9VH75;E1JIH4			>tr|Q961C3|Q961C3_DROME CG8478, isoform B OS=Drosophila melanogaster GN=CG8478 PE=2 SV=1;>tr|Q9VH75|Q9VH75_DROME CG8478, isoform C OS=Drosophila melanogaster GN=CG8478 PE=4 SV=4;>tr|E1JIH4|E1JIH4_DROME CG8478, isoform D OS=Drosophila melanogaster GN=CG8478	0		Both	399.731	0	0	1	zf-C2H2	manual	1	0	0	NA	NA	NA	N/A	N/A	N/A	N/A	N/A	9.56	0	yes	1	0	1	0	0	3		8.52695			6.79227	8.17788		6.37394			5.3451	6.73072	62.427	571;572;576	8.3375e-62	3
527	Q8MSX2;E1JIH5	Mediator of RNA polymerase II transcription subunit 6	MED6	>sp|Q8MSX2|MED6_DROME Mediator of RNA polymerase II transcription subunit 6 OS=Drosophila melanogaster GN=MED6 PE=1 SV=1;>tr|E1JIH5|E1JIH5_DROME Mediator of RNA polymerase II transcription subunit 6 OS=Drosophila melanogaster GN=MED6 PE=3 SV=1	0		Both	0	0	0	0	NA	NA	0	0	1	NA	NA	NA	N/A	N/A	N/A	N/A	N/A	7.8	0	no	0	0	3	0	0	3					8.01317	8.15287					6.89922	7.0389	28.374	249;249	1.4033e-21	0
528	O46339-6;O46339-5;O46339-8;O46339-2;O46339-4;E1JIH9;O46339-3;O46339	Homeobox protein homothorax	hth	>sp|O46339-6|HTH_DROME Isoform F of Homeobox protein homothorax OS=Drosophila melanogaster GN=hth;>sp|O46339-5|HTH_DROME Isoform E of Homeobox protein homothorax OS=Drosophila melanogaster GN=hth;>sp|O46339-8|HTH_DROME Isoform H of Homeobox protein homotho	0		254nm (YW) unique	NA	0	0	0	NA	NA	0	0	1	NA	NA	NA	N/A	N/A	N/A	N/A	N/A	5.89	0	yes	0	0	0	0	0	1						6.78575						5.83151	28.431	266;266;358;372;457;458;471;487	0.0010642	0
529	E1JII1			>tr|E1JII1|E1JII1_DROME CG42633 OS=Drosophila melanogaster GN=CG42633 PE=4 SV=1	0			NA	NA	0	0	NA	NA	0	0	0	NA	NA	NA	N/A	N/A	N/A	N/A	N/A	9.04	0	NA	0	0	0	0	1	0			8.00561						6.6834				42.159	374	0.00064888	0
530	P31409;E1JIJ5	V-type proton ATPase subunit B	Vha55	>sp|P31409|VATB_DROME V-type proton ATPase subunit B OS=Drosophila melanogaster GN=Vha55 PE=2 SV=1;>tr|E1JIJ5|E1JIJ5_DROME Vacuolar H[+]-ATPase 55kD B subunit, isoform C OS=Drosophila melanogaster GN=Vha55 PE=3 SV=1	0	Both	Both	0.0440791	0.101838	0	0	NA	NA	0	0	1	0	0	0	1	1	0	0	0	5.25	0	NA	3	0	27	9	3	28		8.13358	8.14151	9.50453	10.389	10.0811		6.04528	6.72655	7.39155	8.97398	8.66612	54.549	490;490	0	9.2
531	P48810;E1JIK0;P48810-2	Heterogeneous nuclear ribonucleoprotein 87F	Hrb87F	>sp|P48810|RB87F_DROME Heterogeneous nuclear ribonucleoprotein 87F OS=Drosophila melanogaster GN=Hrb87F PE=2 SV=2;>tr|E1JIK0|E1JIK0_DROME Heterogeneous nuclear ribonucleoprotein at 87F, isoform C OS=Drosophila melanogaster GN=Hrb87F PE=2 SV=1;>sp|P48810-2|	0	Both	Both	15.9522	37.4409	1	1	RRM_1	2	1	1	1	1	1	1	1	0	1	1	1	9.05	0	NA	12	6	13	34	8	15	8.61885	10.121	8.65549	12.1193	9.65327	9.93837	7.44276	8.10707	7.4794	10.0532	8.47718	8.76228	39.499	385;385;325	0	31.9
532	E1JIL4		Caf1	>tr|E1JIL4|E1JIL4_DROME Chromatin assembly factor 1 subunit, isoform B OS=Drosophila melanogaster GN=Caf1 PE=2 SV=1	0		Both	0	0	0	0	NA	NA	0	0	0	NA	NA	NA	N/A	N/A	N/A	N/A	N/A	4.76	0	maybe	0	0	1	0	0	1					7.60896	6.94737					6.46283	5.80124	48.563	429	0	0
533	E1JIL5;Q9VFB2-2;Q9VFB2	28S ribosomal protein S10, mitochondrial	mRpS10	>tr|E1JIL5|E1JIL5_DROME Mitochondrial ribosomal protein S10, isoform D OS=Drosophila melanogaster GN=mRpS10 PE=4 SV=1;>sp|Q9VFB2-2|RT10_DROME Isoform A of 28S ribosomal protein S10, mitochondrial OS=Drosophila melanogaster GN=mRpS10;>sp|Q9VFB2|RT10_DROME 2	0	254nm (YW) unique	Both	0.132186	0.266408	0	1	Ribosomal_S10	1	1	1	1	0	0	0	0	1	1	0	0	9.01	1	NA	1	0	5	4	0	6		6.86664		8.93423	8.74996	9.13504		5.52006		7.49996	7.9718	8.35689	17.191	150;163;173	3.9525e-28	10
534	Q7KSE8;Q8IN94;E1JIN6	Trithorax group protein osa	osa	>tr|Q7KSE8|Q7KSE8_DROME Osa, isoform C OS=Drosophila melanogaster GN=osa PE=4 SV=1;>sp|Q8IN94|OSA_DROME Trithorax group protein osa OS=Drosophila melanogaster GN=osa PE=1 SV=1;>tr|E1JIN6|E1JIN6_DROME Osa, isoform D OS=Drosophila melanogaster GN=osa PE=4 SV	0		Both	0	0	0	0	NA	NA	0	0	1	NA	NA	NA	N/A	N/A	N/A	N/A	N/A	7.03	0	yes	0	1	11	0	0	7	6.46009				8.63904	8.23517	4.60274				6.78171	6.37783	268.97	2556;2716;2716	5.9071e-36	0
535	Q9VE86;E1JIP3	Werner Syndrome-like exonuclease	WRNexo	>sp|Q9VE86|WRNXO_DROME Werner Syndrome-like exonuclease OS=Drosophila melanogaster GN=WRNexo PE=1 SV=2;>tr|E1JIP3|E1JIP3_DROME WRN exonuclease, isoform B OS=Drosophila melanogaster GN=WRNexo PE=4 SV=1	0	254nm (YW) unique	Both	1.78848	4.10678	0	0	NA	NA	0	0	1	0	0	0	0	0	0	0	0	9.17	0	NA	1	0	4	6	0	4		7.74096		9.05746	8.4206	8.06126		5.89604		7.18817	7.21648	6.85714	40.292	353;354	1.1791e-25	3.7
536	P23573;E1JIR3;Q7KM04;Q7KM08;Q7KM05;Q9XTK9;Q7KM03;M9PE01	Cell division control protein 2 cognate	cdc2c	>sp|P23573|CDC2C_DROME Cell division control protein 2 cognate OS=Drosophila melanogaster GN=cdc2c PE=1 SV=1;>tr|E1JIR3|E1JIR3_DROME Cdc2c, isoform C OS=Drosophila melanogaster GN=cdc2c PE=4 SV=1	0		Both	0	0.0434647	0	0	NA	NA	0	0	1	NA	NA	NA	N/A	N/A	N/A	N/A	N/A	8.3	0	NA	1	0	12	1	0	13				8.1815	9.1384	9.225				6.32539	7.88313	7.96973	35.888	314;314;501;509;509;522;522;538	1.2805e-70	2.5
537	Q9VCZ8;E1JIT4	Probable prefoldin subunit 5	CG7048	>sp|Q9VCZ8|PFD5_DROME Probable prefoldin subunit 5 OS=Drosophila melanogaster GN=CG7048 PE=2 SV=1;>tr|E1JIT4|E1JIT4_DROME CG7048, isoform B OS=Drosophila melanogaster GN=CG7048 PE=4 SV=1	0		Both	0	0	0	0	NA	NA	0	0	0	NA	NA	NA	N/A	N/A	N/A	N/A	N/A	6.75	0	NA	0	0	10	0	0	13					9.43284	10.2218					8.43284	9.22175	19.077	168;168	8.3907e-268	0
538	Q9VCP1-2;E1JIU3;Q9VCP1	Uncharacterized protein CG4449	CG4449	>sp|Q9VCP1-2|Y4449_DROME Isoform B of Uncharacterized protein CG4449 OS=Drosophila melanogaster GN=CG4449;>tr|E1JIU3|E1JIU3_DROME CG4449, isoform B OS=Drosophila melanogaster GN=CG4449 PE=4 SV=1;>sp|Q9VCP1|Y4449_DROME Uncharacterized protein CG4449 OS=Dros	0		Both	0	0.0792055	0	0	NA	NA	0	0	0	NA	NA	NA	N/A	N/A	N/A	N/A	N/A	6.13	0	NA	0	0	5	1	0	4				7.4288	8.53382	8.26696				5.56102	7.2116	6.94473	47.587	422;422;424	2.6469e-48	0
539	O62618;E1JIV6	Mitogen-activated protein kinase 14A	Mpk2	>sp|O62618|MK14A_DROME Mitogen-activated protein kinase 14A OS=Drosophila melanogaster GN=Mpk2 PE=1 SV=1;>tr|E1JIV6|E1JIV6_DROME Mpk2, isoform C OS=Drosophila melanogaster GN=Mpk2 PE=4 SV=1	0		365nm (X490) unique	0	NA	0	0	NA	NA	0	0	0	NA	NA	NA	N/A	N/A	N/A	N/A	N/A	6.35	0	NA	0	0	1	0	0	0					7.07122						5.81596		42.255	366;366	1.1678e-13	0
540	Q7KS07;Q9VC27;E1JIV8	Nicastrin	nct	>tr|Q7KS07|Q7KS07_DROME Nicastrin, isoform B OS=Drosophila melanogaster GN=nct PE=4 SV=1;>sp|Q9VC27|NICA_DROME Nicastrin OS=Drosophila melanogaster GN=nct PE=1 SV=3;>tr|E1JIV8|E1JIV8_DROME Nicastrin, isoform C OS=Drosophila melanogaster GN=nct PE=4 SV=1	0		Both	0	0	0	0	NA	NA	0	0	0	NA	NA	NA	N/A	N/A	N/A	N/A	N/A	5.66	0	NA	0	0	6	0	0	11					8.28411	8.92158					6.82173	7.45918	74.602	665;695;695	1.1113e-55	0
541	E1JIY8			>tr|E1JIY8|E1JIY8_DROME CG42498 OS=Drosophila melanogaster GN=CG42498-RA PE=4 SV=1	0		Both	0	0	0	0	NA	NA	0	0	0	NA	NA	NA	N/A	N/A	N/A	N/A	N/A	5.64	0	NA	0	0	3	0	0	3					8.20325	8.26942					7.30014	7.36635	12.507	111	4.5693e-25	0
542	Q7KRY7-2;Q7KRY7-9;Q7KRY7;Q7KRY7-10;E1JIZ1;E1JIZ2;E1JIZ0;Q7KRY7-7;Q7KRY7-5;Q7KRY7-8;Q7KRY7-3;Q7KRY7-6;Q7KRY7-4	Protein lap4	scrib	>sp|Q7KRY7-2|LAP4_DROME Isoform A of Protein lap4 OS=Drosophila melanogaster GN=scrib;>sp|Q7KRY7-9|LAP4_DROME Isoform J of Protein lap4 OS=Drosophila melanogaster GN=scrib;>sp|Q7KRY7|LAP4_DROME Protein lap4 OS=Drosophila melanogaster GN=scrib PE=1 SV=1;>sp	0		Both	0	0	0	0	NA	NA	0	0	1	NA	NA	NA	N/A	N/A	N/A	N/A	N/A	5.04	0	NA	0	0	8	0	0	12					8.21107	8.72963					6.37856	6.89712	190.19	1756;1850;1851;2331;2426;2490;2585;1939;1707;1711;1247;1200;1205	2.4278e-52	0
543	Q9VB69;E1JIZ5;E1JIZ4	Malic enzyme	Men-b	>tr|Q9VB69|Q9VB69_DROME Malic enzyme OS=Drosophila melanogaster GN=Men-b PE=2 SV=1;>tr|E1JIZ5|E1JIZ5_DROME Malic enzyme OS=Drosophila melanogaster GN=Men-b PE=3 SV=1;>tr|E1JIZ4|E1JIZ4_DROME Malic enzyme OS=Drosophila melanogaster GN=Men-b PE=3 SV=1	0		Both	0	0	0	0	NA	NA	0	0	0	NA	NA	NA	N/A	N/A	N/A	N/A	N/A	6.26	0	NA	0	0	10	0	0	1					8.60924	7.34974					7.06517	5.80568	68.593	617;621;624	3.8063e-34	0
544	Q9VAX3;Q9VAX5;E1JIZ9			>tr|Q9VAX3|Q9VAX3_DROME CG34362, isoform A OS=Drosophila melanogaster GN=CG12870 PE=2 SV=2;>tr|Q9VAX5|Q9VAX5_DROME CG34362, isoform B (Fragment) OS=Drosophila melanogaster GN=CG12870 PE=4 SV=3;>tr|E1JIZ9|E1JIZ9_DROME CG34362, isoform D (Fragment) OS=Drosop	0	254nm (YW) unique		NA	YW whole not available	0	1	RRM_1	2	1	1	1	1	1	1	1	0	1	1	1	8.41	0	NA	0	0	0	7	0	0				9.83486						8.26752			54.115	505;793;800	0	0
545	Q9VN95;E1JJ50	Enolase-phosphatase E1	CG12173	>sp|Q9VN95|ENOPH_DROME Enolase-phosphatase E1 OS=Drosophila melanogaster GN=CG12173 PE=1 SV=2;>tr|E1JJ50|E1JJ50_DROME CG12173, isoform B OS=Drosophila melanogaster GN=CG12173 PE=3 SV=1	0		Both	0	0	0	0	NA	NA	0	0	0	NA	NA	NA	N/A	N/A	N/A	N/A	N/A	5.7	0	NA	0	0	12	0	0	13					9.18452	9.57946					8.03838	8.43334	28.297	256;256	3.5066e-170	0
546	Q9VND3;E1JJ51;Q8I0B7		Pi4KIIalpha	>tr|Q9VND3|Q9VND3_DROME LD24833p OS=Drosophila melanogaster GN=Pi4KIIalpha PE=2 SV=3;>tr|E1JJ51|E1JJ51_DROME Pi4KIIalpha, isoform D OS=Drosophila melanogaster GN=Pi4KIIalpha PE=4 SV=1;>tr|Q8I0B7|Q8I0B7_DROME AT12695p OS=Drosophila melanogaster GN=Pi4KIIalp	0		Both	0	0	0	0	NA	NA	0	0	0	NA	NA	NA	N/A	N/A	N/A	N/A	N/A	5.8	0	NA	0	0	11	0	0	9					8.6152	8.51958					6.99196	6.89632	78.954	710;710;563	7.0476e-40	0
547	P51123-2;E1JJ72;P51123-3;P51123	Transcription initiation factor TFIID subunit 1	Taf1	>sp|P51123-2|TAF1_DROME Isoform A of Transcription initiation factor TFIID subunit 1 OS=Drosophila melanogaster GN=Taf1;>tr|E1JJ72|E1JJ72_DROME FI22504p1 OS=Drosophila melanogaster GN=Taf1 PE=2 SV=1;>sp|P51123-3|TAF1_DROME Isoform C of Transcription initia	0		Both	0	0.963743	0	0	NA	NA	0	0	1	NA	NA	NA	N/A	N/A	N/A	N/A	N/A	5.15	0	maybe	0	0	5	1	1	3			6.30393	7.86935	8.2962	7.58995			4.34015	5.32764	6.33242	5.62616	232.22	2065;2096;2098;2129	5.6703e-22	0
548	O97067;E1JJ73	Probable peptidyl-tRNA hydrolase 2	CG1307	>sp|O97067|PTH2_DROME Probable peptidyl-tRNA hydrolase 2 OS=Drosophila melanogaster GN=CG1307 PE=2 SV=2;>tr|E1JJ73|E1JJ73_DROME CG1307, isoform C OS=Drosophila melanogaster GN=CG1307 PE=4 SV=1	0	254nm (YW) unique	Both	0	32.1656	0	1	PTH2	1	1	1	1	0	0	0	0	0	0	0	0	9.08	0	NA	0	0	5	2	0	1				8.57454	9.22899	6.71992				6.9906	8.27476	5.76568	19.873	186;186	7.5606e-98	0
549	O97394;E1JJC3;O97394-2	Protein sidekick	sdk	>sp|O97394|SDK_DROME Protein sidekick OS=Drosophila melanogaster GN=sdk PE=1 SV=2;>tr|E1JJC3|E1JJC3_DROME Sidekick, isoform B (Fragment) OS=Drosophila melanogaster GN=sdk PE=4 SV=1;>sp|O97394-2|SDK_DROME Isoform C of Protein sidekick OS=Drosophila melanoga	0		Both	0	0	0	0	NA	NA	0	0	0	NA	NA	NA	N/A	N/A	N/A	N/A	N/A	5.94	0	NA	0	0	6	0	0	6					7.77692	8.03032					5.69056	5.94396	246.25	2224;2224;2232	4.7064e-21	0
550	Q9W4K1;E1JJE0		rb	>tr|Q9W4K1|Q9W4K1_DROME Ruby, isoform A OS=Drosophila melanogaster GN=rb PE=4 SV=1;>tr|E1JJE0|E1JJE0_DROME Ruby, isoform B OS=Drosophila melanogaster GN=rb PE=4 SV=1	0		Both	0	0.0479449	0	0	NA	NA	0	0	0	NA	NA	NA	N/A	N/A	N/A	N/A	N/A	6.09	0	NA	0	0	17	1	1	6			6.07471	7.23373	9.0154	8.30423			4.30384	4.93164	7.24455	6.53337	127.14	1160;1178	4.4631e-53	0
551	Q9U969-3;Q9U969;E1JJF4	Neuropathy target esterase sws	sws	>sp|Q9U969-3|SWS_DROME Isoform C of Neuropathy target esterase sws OS=Drosophila melanogaster GN=sws;>sp|Q9U969|SWS_DROME Neuropathy target esterase sws OS=Drosophila melanogaster GN=sws PE=1 SV=2;>tr|E1JJF4|E1JJF4_DROME FI19439p1 OS=Drosophila melanogaste	0		365nm (X490) unique	0	NA	0	0	NA	NA	0	0	0	NA	NA	NA	N/A	N/A	N/A	N/A	N/A	7.98	0	NA	0	0	3	0	0	0					7.40514						5.5856		160.67	1425;1425;1425	4.355e-05	0
552	P07183;E1JJF7	Chorion protein S38	Cp38	>sp|P07183|CH38_DROME Chorion protein S38 OS=Drosophila melanogaster GN=Cp38 PE=2 SV=1;>tr|E1JJF7|E1JJF7_DROME Chorion protein 38, isoform B OS=Drosophila melanogaster GN=Cp38 PE=4 SV=1	0		Both	0	0	0	0	NA	NA	0	0	0	NA	NA	NA	N/A	N/A	N/A	N/A	N/A	9.18	0	NA	0	0	1	0	0	7					7.29097	9.063					6.33672	8.10873	30.447	306;306	1.2766e-16	0
553	P20241-2;E1JJF9;P20241;E1JJF8;M9NEZ5	Neuroglian	Nrg	>sp|P20241-2|NRG_DROME Isoform A of Neuroglian OS=Drosophila melanogaster GN=Nrg;>tr|E1JJF9|E1JJF9_DROME Neuroglian, isoform D OS=Drosophila melanogaster GN=Nrg PE=4 SV=1;>sp|P20241|NRG_DROME Neuroglian OS=Drosophila melanogaster GN=Nrg PE=1 SV=2;>tr|E1JJF	0		365nm (X490) unique	0	NA	0	0	NA	NA	0	0	0	NA	NA	NA	N/A	N/A	N/A	N/A	N/A	5.31	0	NA	0	0	2	0	0	0					7.61685						5.85342		138.36	1239;1239;1302;1302;1309	8.0131e-05	0
554	E1JJG4;Q9W395;M9PE37		APC4	>tr|E1JJG4|E1JJG4_DROME Anaphase promoting complex 4, isoform C OS=Drosophila melanogaster GN=APC4 PE=4 SV=1;>tr|Q9W395|Q9W395_DROME Anaphase promoting complex 4, isoform A OS=Drosophila melanogaster GN=APC4 PE=2 SV=1;>tr|M9PE37|M9PE37_DROME Anaphase promo	0		Both	0	0	0	0	NA	NA	0	0	0	NA	NA	NA	N/A	N/A	N/A	N/A	N/A	4.83	0	NA	0	0	5	0	0	3					8.32566	7.64517					6.76936	6.08888	87.184	773;775;367	5.3965e-17	0
555	P54367;E1JJI5	Casein kinase I isoform alpha	CkIalpha	>sp|P54367|KC1A_DROME Casein kinase I isoform alpha OS=Drosophila melanogaster GN=CkIalpha PE=1 SV=1;>tr|E1JJI5|E1JJI5_DROME Casein kinase ialpha, isoform D OS=Drosophila melanogaster GN=CkIalpha PE=4 SV=1	0	254nm (YW) unique	Both	0	14.7797	0	0	NA	NA	0	0	0	0	0	0	1	1	0	1	0	9.42	0	NA	0	0	9	6	1	1			7.02633	9.1706	8.53797	7.60995			5.74757	7.21838	7.25921	6.33118	39.535	337;337	1.1126e-31	0
556	E1JJL4;P30432;P30432-2;E1JJL5	Furin-like protease 2	Fur2	>tr|E1JJL4|E1JJL4_DROME Furin 2, isoform I OS=Drosophila melanogaster GN=Fur2 PE=3 SV=1;>sp|P30432|FUR2_DROME Furin-like protease 2 OS=Drosophila melanogaster GN=Fur2 PE=2 SV=2;>sp|P30432-2|FUR2_DROME Isoform A of Furin-like protease 2 OS=Drosophila melano	0		Both	0	0	0	0	NA	NA	0	0	0	NA	NA	NA	N/A	N/A	N/A	N/A	N/A	6.12	0	NA	0	0	3	0	0	5					7.85405	8.42198					6.04786	6.6158	180.69	1655;1679;1682;586	2.0394e-18	0
557	P48149;E1JJM9	40S ribosomal protein S15Aa	RpS15Aa	>sp|P48149|RS15A_DROME 40S ribosomal protein S15Aa OS=Drosophila melanogaster GN=RpS15Aa PE=1 SV=2;>tr|E1JJM9|E1JJM9_DROME Ribosomal protein S15Aa, isoform F OS=Drosophila melanogaster GN=RpS15Aa PE=3 SV=1	0	Both	Both	1.94189	0.355819	0	1	Ribosomal_S8	1	1	1	1	1	1	0	1	0	1	1	0	9.84	1	NA	5	2	11	6	3	10	7.83939	10.1715	8.46869	9.68266	10.6142	9.70281	6.88515	8.37522	7.51444	8.01733	9.65993	8.74857	14.771	130;130	2.3649e-245	38.5
[truncated: 3,957 more rows]
[truncated: 34 more columns]

## Sheet: Transcriptome - Embryogenesis
id	in_proteome	RBP_bins	early_fly_mRBPome_catgetory	early_fly_mRBPome__enrichment_H_M_L	RNA_binding_in_GOMF	GO_RNArelated	RBD	RBDs	No_of_RBDs_in_order	conservation	orthologue_to_RBPcensus.Tuschl.	Ribosomal_Protein	TF_annotation_FlyTF	annotation_ID	FBgn	GeneSymbol	secondary_FBgn	secondary_annotation_ID	optimal_Protein_ID	length_optimal_Protein_ID	number_of_Domains	number_of_IDs	how_many_have_similar_max	Prot_Ids	Protein_length	Protein_names	Gene_names	secondary_annotation_ID.1	E0.2h	E2.4h	E4.6h	E6.8h	E8.10h	E10.12h	E12.14h	E14.16h	E16.18h	E18.20h	E20.22h	E22.24h	mfuzz_6clusters	mfuzz_10clusters
[truncated: 11,232 more rows]

[truncated: 1 more sheets: Transcriptome - All Dev Stages]
