# Supplementary material for: The mRNA-bound proteome of the early fly embryo
Source: HighWire-hosted journal article supplement (doi:10.1101/gr.200386.115), 2016-04-28
Supplement: Supplemental_Methods.docx [file Supplemental_Methods.docx]

**Supplementary Methods**

*Fly strains:*

*Yw* flies were used for all UV 254nm crosslinking experiments. X490 flies were used for applications using 4-thiouracil. This strain contains *nos*-GAL4 and UAS-*uracil phosphoribosyltransferase* (UPRT) transgenes, and drives UPRT expression specifically in nurse cells. The X490 stock was generated by standard genetic crosses of *nos*-GAL4 flies (a generous gift from Peter Gergen) to UPRT flies (Bloomington stock #27603) to create double homozygous flies.

*Metabolic labeling of D. melanogaster embryo RNA with 4-thiouridine*

4-Thiouracil stock solution was prepared in 50% DMSO ranging from 0 to 400mM. Brewers yeast (Acros Organics) and the respective 4-thiouracil containing stock solution were mixed 1:1 (w/w) . The yeast paste was heat inactivated at 55°C for 10 min and stored at 4°C. 4-thiouracil containing fly food was fed to the UPRT-expressing X490 flies. 4-Thiouridine containing yeast paste was prepared the same way.

*4-thiouridine* *incorporation assays*

*D. melanogaster* total RNA was isolated by TRIzol extraction. RNA was ethanol precipitated to remove traces of DTT before biotinylation. For thiol-specific biotinylation dot-blot assays were carried out as described previously (Dölken et al. 2008). For dot-blot assays, 1 μg total biotinylated RNA was spotted on the membrane. As a positive control we used a 5’-biotinylated 55mer random DNA oligo, RNA from flies fed on brewers yeast without photoreactive nucleosides served as negative control. LC-MS/MS based 4SU incorporation rates were determined as described previously (Jungkamp et al. 2011).

*UV-crosslinking of D. melanogaster embryos*

UV365nm Crosslinking: Adult UPRT-expressing X490 flies were fed with 400mM 4‑thiouracil yeast paste (for at least 3 days, ensuring incorporation of photoreactive nucleosides in *D. melanogaster* embryo RNA) and staged 0‑2h old embryos were collected for UV‑irradiation. Before UV-irradiation, the yeast paste was removed from the grape juice agar plates containing the embryos and a thin layer of cold water was added to the agar plates. The embryos were carefully brushed from the plate with a soft brush, allowing them to float on a thin layer of water. The embryos on the agar plate were immediately cooled down on ice and UV365nm irradiated in a Spectrolinker 1500A with 4 J/cm2. During UV-irradiation the embryos were constantly chilled on ice to inhibit further development. Embryos were washed with deionized water and dechorionated with bleach before freezing and storing at -80°C.

UV254nm Crosslinking: Adult *yw* flies were fed with standard yeast paste and 0‑2h old embryos were collected for UV‑irradiation. Embryo preparation and collection were performed as described above for UV365nm-crosslinking, but the embryos were irradiated with UV light at 254nm in a Spectrolinker 1500A with 4 J/cm2.

*Sample preparation for mass spectrometry analysis of Precipitated Proteins*

After nuclease treatment proteins were concentrated with an Amicon Ultra-15 centrifugal filter unit (10kDa-cutoff). mRNA-bound proteins were separated on a NuPAGE Novex 4 to 12% gradient gel (Invitrogen) using reducing conditions. Proteins were fixed in fixative solution (50% methanol (v/v), 10% acetic acid (w/v)) and stained afterwards with the Colloidal Blue staining Kit (Invitrogen). Gel lanes were cut into 10 gel slices, which were individually subjected to reduction, alkylation and in-gel digestion with lysyl endopeptidase (Wako) and sequence grade modified trypsin (Promega) according to standard protocols (Shevchenko et al., 2006). After in-gel digestion peptides were extracted and desalted using C18 StageTips prior to nanoLC-MS/MS analysis.

*Sample preparation for whole proteome analysis*

Proteins from the inputs of the non-crosslinked samples were precipitated with methanol-chloroform extraction (Wessel and Flügge 1984) and resuspended in 50 µL of 8 M urea and 0.1 M Tris-HCl, pH 8. Proteins were reduced with 10 mM DTT at room temperature for 30 min and alkylated with 50 mM iodoacetamide at room temperature for 30 min in the dark. Proteins were first digested by lysyl endopeptidase (LysC) (Wako) at a LysC-to-protein ratio of 100:1 (w/w) at room temperature for 3 h. Then, the sample solution was diluted to final concentration of 2 M urea with 50 mM ammonium bicarbonate. Trypsin (Promega) digestion was performed at a trypsin-to-protein ratio of 100:1 (w/w) under constant agitation at room temperature for 16 h. Peptides were fractionated into 4 fractions with SCX Stage Tips and desalted with C18 Stage Tips (Rappsilber et al. 2003) prior to nanoLC-MS/MS analysis.

*HPLC and mass spectrometry*

Reversed-phase liquid chromatography was performed by employing an EASY nLC II (Thermo Fisher) using self-made fritless C18 microcolumns (Ishihama et al., 2002) (75 μm ID packed with ReproSil-Pur C18-AQ 3-μm resin, Dr. Maisch GmbH) connected on-line to the electrospray ion source (Proxeon) of a Q Exactive mass spectrometer (Thermo Fisher). Peptide samples were eluted at a flow rate of 250 nl/min with a 5 to 95 % acetonitrile gradient in 0.5% acetic acid over 2 h for mRNA-bound proteome analysis and 4 h for whole proteome analysis. Settings for MS analysis is as follows: one full scan (resolution 70,000; m/z 300–1,700; target value 3e6; maximum injection 20 ms) followed by top 10 MS/MS scans (resolution 17,500; target value 1e6; maximum injection 60 ms) using higher-energy collisional dissociation (HCD) (isolation width, 2; normalized collision energy, 26). The Q Exactive instrument was operated in the data dependent mode (DDA) with a full scan in the Orbitrap followed by up to 10 consecutive MS/MS scans. Ions with an unassigned charge state and singly charged ions were rejected. Former target ions selected for MS/MS were dynamically excluded for 30 s.

*Processing of mass spectrometry data*

All raw data were analyzed and processed by MaxQuant (v1.4.1.2) (Cox and Mann 2008). Search parameters included two missed cleavage sites, cysteine carbamidymethyl fixed modification, and variable modifications including methionine oxidation and protein N-terminal acetylation. The peptide mass tolerance was 6 ppm and the MS/MS tolerance was 20 ppm. Database search was performed with Andromeda (Cox et al. 2011) against UniProt/Swiss-Prot fly database (February, 2014) with common serum contaminants and enzyme sequences. False discovery rate (FDR) was set to 1% at peptide and at protein level.

*Mass spectrometry data analysis*

For protein quantification, label-free algorithm based on peptide extracted ion chromatograms (XICs) was used. Proteins 1) identified by at least 2 unique peptides in the UV crosslinked samples and 2) whose sum of XICs was more than 10-times higher than that of non-crosslinked samples were considered as “RBPome” in this study. For absolute quantification we employed intensity-based absolute quantification (iBAQ) as previously described (Schwanhäusser et al. 2011).

*Identification of mRNA-crosslinked proteins by Western Blot analysis*

Input, supernatant after precipitation and the oligo(dT)-purified material was nuclease treated and the protein was analyzed on a 4-15 % Bis-Tris acrylamide gradient gel. After protein transfer, the nitrocellulose membrane was blocked and incubated with an antibody against the endogenous Aubergine protein (rabbit anti-Aubergine (*D. melanogaster*) antibody was kindly provided by the laboratory of Ruth Lehmann (NYU Langome Medical Center, NYC, USA)). The anti-AGO1 (ab5070) and anti-Histone 3 (ab1791) antibodies were obtained from Abcam. HRP-conjugated secondary antibodies were used and the proteins were visualized using the ECL select Western blot detection reagent (GE-Healthcare).

To visualize similar protein expression in non- and UV-irradiated cells in candidate RBP validation experiments, western blot membranes were probed with either anti-Flag HRP linked antibody (SIGMA, A8592) or anti-HA (Life Technologies, 715500) and HRP-conjugated anti-mouse secondary antibody.

*Generation of stable Drosophila S2 cell lines*

*Drosophila* S2 cells were cultured in Express Five SFM medium supplemented with glutamine, 10% heat inactivated FBS and 1% penicillin/streptavidin at 25°C. For the generation of S2 cells, which express epitope-tagged candidate RBPs upon CuSO4 induction, we seeded 1.5 ml of cells at 2*106 cells/ml into 6-well dishes. On the next day cells were transfected with expression plasmids using Effectene (QIAGEN) doubling the recommended reagent amounts following the manufacturer instruction. On day two, the medium was carefully exchanged for selection medium containing 200µg/µl hygromycin, and reduced to 100µg/µl hygromycin after two more days. Selection was monitored over 3-4 weeks before the selected cells could be passaged for the first time. Cells were kept under selection during subculturing.

*Validation of RNA-binding activity of novel RBP candidates*

Candidate RBPs have been selected based on the mean (UV254nm and UV365nm) mass spectrometry iBAQ intensity ratio between oligo(dT) pull-down samples ( = pull-down) and whole early embryo proteome samples ( = whole) (log10(iBAQ intensities(pull-down / whole); high = > 1, medium = 0-1, low = < 0; eight candidates from each enrichment class). Each RBP candidate was identified by both crosslinking approaches. cDNA clones were selected from the Berkeley Drosophila Genome Project (Stapleton et al. 2002) (www.fruitfly.org) and purchased from the Drosophila Genome Research Centre (DGRC). Plasmids were validated by Sanger sequencing and protein size was verified by Western blot analysis. Plasmid names are available in Supplementary File 1.

RNA interaction validation experiments were conducted in either transient transfected cells or stable cell lines as described previously (Kwon et al. 2013). For transient transfection, two times 24*106/8ml cells were seeded into 10cm dishes. On the next day, cells were transfected using Effectene (4.8 µg plasmid, 38.4µl enhancer, 120µl Effectene) and incubated for another 30 hours. Expression was induced with 500µM CuSO4 for 36h. For stable cell lines (generation of stable cell lines is described in Supplementary Methods), cells were seeded at 40*106/10ml and cultured for 48h. Expression was induced with 300µM or 500µM CuSO4 for 16h. At harvest, cells were washed with ice‑cold PBS and either UV crosslinked (400 mJ/cm2, 254nm) or not. Cells were lysed in 1ml lysis buffer (50mM Tris–HCl, pH 7.4, 100mM NaCl, 1% NP40, 0.1% SDS, 0.5% sodium deoxycholate, Complete Protease Inhibitor (Roche), 40U/ml RNasin). RNA and DNA digest was carried out with 333U/ml (1:333 (v/v)) RNase I (Invitrogen) and 4U/ml (1:500 (v/v)) TurboDNase (Promega) for 3 or 4 minutes, 1100 rpm at 37°C. The protein of interest was immunoprecipitated from the cleared lysate with 20µl Dynabeads Protein G (Life) conjugated with 5µg mouse FLAG-M2 antibody (SIGMA, F1804) for 2h at 4°C. Beads were washed thrice with high salt wash buffer (50mM Tris–HCl pH 7.4, 1M NaCl, 1mM EDTA, 1% NP40, 0.1% SDS, 0.5% sodium deoxycholate) and twice with PNK buffer (20mM Tris–HCl pH 7.4, 10mM MgCl2, 0.2% Tween-20) before radiolabelling with γ‑32P-ATP (1µl PNK, 0.4 µl γ‑32P-ATP, 2 µl 10x PNK buffer, 0.5 µl RNasin, 16.1 µl H2O) for 20 minutes, 1100rpm and 37°C. Subsequently, samples were washed twice with PNK buffer to reduce free γ‑32P-ATP run and run on a 4-12% Bis-Tris SDS-gel, blotted to a nitrocellulose membrane and exposed to phosphorimager screen. Untransfected S2 cells crosslinked or not were used as negative control to estimate background signal in order to be able to find even subtle differences in the protein specific radiograms.

*Gene set enrichment analysis*

Gene ontology analysis using the DAVID Bioinformatics Database (DAVID Bioinformatics Resources, http://david.abcc.ncifcrf.gov/) was performed with genes to find enriched biological processes. Terms with a corrected p-value <0.01 in at least one regime were selected, log- and z-transformed and hierarchically clustered.

*Isoelectric point analysis*

Isoelectric points were calculated using pK values of amino acids according to (Bjellqvist et al. 1993; Gasteiger et al. 2005)

*Conservation analyses*

For the conservation analysis, we used Ensembl Compara (Vilella et al. 2009) (Release 80) and querried all FlyBase genes (FBgn) (BDGP6) against five selected species (*H. sapiens, M. musculus, D. rerio, C. elegans, and S. cerevisiae*). For each fly gene, we took the identity score of the target protein to each species. If one gene had more than one orthologous protein in the queried species, we took the mean identity score of the orthologous proteins, which resulted in an average conservation score per gene. The conservation score per *D. melanogaster* gene was used to assess conservation of all RBP candidates to the five species queried and for transcriptome sub group comparisons to *H. sapiens*.

*Overlap to human RBP census*

The human genome (GRCh38.p2) was queried against the fly genome using Ensembl Compara (Vilella et al. 2009) (Release 80). RBPs from the human RBP census (Gerstberger et al. 2014) were matched by Ensembl gene IDs. Fly orthologues were considered irrespective of the degree of amino acid sequence identity. The overlap between fly mRBPome and human RBP census was constructed by merging the FBgn of the query with the Fly mRBPome FBgn.

*Protein Domain Enrichment*

Protein IDs for each gene expressed during *Drosophila* embryogenesis were retrieved from the Uniprot *Drosophila melanogaster* proteome *3AUP000000803* release 02.2015 and matched by CG gene ID. For the early fly embryo and mRBPome, Protein IDs were kept according to mass spec annotation. Protein domain information was retrieved from the Pfam database (Finn et al. 2014) (DROME7227 v28). For all proteins in the RBPome or early embryo proteome, if more than one alternative ID represented one protein, we selected the longest protein isoform with the most protein domains.

For the protein domain enrichment analysis, each protein was queried whether a domain existed or not irrespective their number (i.e. a protein with 4 KH domains, was counted as one protein with a KH domain). Quantified proteins domains within the fly mRBPome were compared against all proteins domains in proteins expressed within the first two hour of embryogenesis. This background set was derived by assuming that all transcripts with FPKM > 0 within the first two hours of embryogenesis are translated (compare *Embryonic gene expression analysis*). Statistical significance was calculated using Bonferroni corrected Fisher’s exact testing. A list of 799 known RNA-binding domains was previously described in the human RBP census (Gerstberger et al. 2014).

*Protein Disorder and low complexity*

Intrinsic protein disorder was calculated using IUPred (Dosztányi et al. 2005) as described before (Kwon et al. 2013). We used the same >0.4 cut off to assign disorder. We calculated the average protein disorder as a ratio of disordered amino acids relative to the protein amino acid sequence length for each protein and compared the early RBPome and proteome (selected for the longest and domain richest isoform) against the entire *Drosophila melanogaster* proteome (Uniprot DROME7227 v28) including all protein isoforms. Protein amino acid proportion enrichment was calculated for total protein and disordered regions alone relative to the early fly proteome. Note, since we chose the longest and domain-richest isoform for each protein in the mRBPome and early fly proteome, we see an overall tendency for lower proportion of disordering amino acids compared to the all-isoform-containing fly proteome. Also, due to the underestimate of our high confidence early fly RBPome compared to RBPs expressed and caught in the early fly proteome, the proteome is still rich in more disordered proteins, which skews the distribution and makes the difference to the early fly RBPome relatively small.

Amino acid sequence complexity was calculated as previously described (Castello et al. 2012). We calculated the amino acid sequence entropy at each position within each protein and scanned the amino acid sequence in a sliding window of twenty amino acids (ten residues upstream to ten residues downstream of the respective amino acid; for amino acid sequence start and end (first and last 10 residues), we assigned the mean bits of the respective total amino acid sequence). Low complexity regions were assigned if the window tested was bits < 3. We determined the proportion of low complex amino acids (bits < 3) within disordered (>0.4) regions of each protein.

*Intersection with GenomeRNAi data base*

We extracted data from the GenomeRNAi data base v14 containing 201 genome wide or targeted RNAi screens, with 67 screens conducted on whole flies (Schmidt et al. 2013). We intersected our lists with all 201 screens to determine the fraction of genes, which have been assigned at least one phenotype in any screen. For essential genes, we considered genes, whose mis-regulation resulted in a phenotype description including the string “lethal” in at least one out of the 67 *in vivo* screens.

*Pep and CG3800 CLIP-seq library preparation*

S2 cell lines stably expressing FLAG/HA-tagged Pep or CG3800 proteins were seeded at a density of 2*106 cells per ml and cultured for 48h. Protein expression was induced with addition of CuSO4 at a final concentration of 300µM and cultured for additional 18h. CLIP-seq was performed in biological replicates and was essentially described in (Hafner et al. 2010). Buffers were used from (Huppertz et al. 2014). Briefly, cells were scraped and washed in ice cold PBS before 254nm UV-irradiation (400mJ/cm2). Cells were immediately lysed in NP-40 lysis buffer (50mM Tris–HCl pH 7.4, 100mM NaCl, 1% Igepal CA-630 (NP40), 0.1% SDS, 0.5% sodium deoxycholate, Complete Protease Inhibitor to a final concentration of 2x, RNAsin 40U per ml lysis buffer; 1ml lysis buffer per 150 * 106 cells, ~700 * 106 cells in total per sample). After treatment with RNase I (Life; 1:333 (v/v)) and TurboDNase (Ambion; 1:500 (v/v)) for 3.5 min at 37°C and 1100rpm, immunoprecipitation (IP) was carried out with monoclonal FlagM2 (SIGMA) coated magnetic protein G dynabeads (Life) on spin-cleared cell extracts for 2 h at 4ºC. Before IP, 50µl of the cleared lysate was taken, proteinase K treated and used for RNA extraction (Zymo DirectZol RNA-Mini Prep Kit). 2.5µg of this fragmented input total RNA was Ribozero treated. 100ng of rRNA-depleted, radioactively end-labeled input RNA was used to construct CLIP input libraries and resumed to CLIP cloning procedure at the step of 3’adapter ligation and was therefore subjected to the same RNA fragment size selection and adapter ligation procedures (see below).

After IP, CLIP samples were stringently washed 3 times with high salt buffer (50mM Tris–HCl, pH 7.4, 1M NaCl, 1mM EDTA, 1% Igepal CA-630 (NP40), 0.1% SDS, 0.5% sodium deoxycholate). Samples were radioactively end-labeled with γ‑32P-ATP (1x PNK buffer (NEB), including DTT and TritonX to 0.1% final, 0.5 μCi/μl γ‑32P-ATP and T4 PNK (NEB) to 1 U/µl; 25min at 37°C and 1100rpm) and subsequent addition of 1µl high molar ATP for efficient 5’end phosphorylation. The crosslinked protein-RNA complexes were resolved on a 4-12% NuPAGE gel (Invitrogen). The SDS-PAGE gel was transferred to a nitrocellulose membrane (BioRad) and the protein-RNA complex migrating at an expected molecular weight was excised. RNA was isolated by Proteinase K (Roche) treatment and phenol-chloroform extraction, ligated to 3′ adapter (NNNN-TGGAATTCTCGGGTGCCAAGG) and 5′ adapter (GTTCAGAGTTCTACAGTCCGACGATC-NNNN), reverse transcribed, PCR-amplified (PCR cycles for libraries: PEP_CLIP_R1 und R2 18 x cycles; PEP_INPUT_R1 und R2 10 x cycles; CG3800_CLIP_R1 und R2 14 x cycles, CG3800_INPUT_R1 und R2 10 x cycles), and gel-excised. The amplified Pep cDNA was sequenced on HighSeq2000 (Illumina) with a 1x51 nt cycle. CG3800 cDNA was sequenced on NextSeq500 (Illumina) with 75 cycles single end high output.

*CLIP library processing*

Reads from the Pep and CG3800 CLIP library were quality trimmed (-q 25) and stripped off the adaptor sequence stepwise using Cutadapt, keeping the randomized nucleotides (-a TGGAATTCTCGGGTGCCAAGG -g GTTCAGAGTTCTACAGTCCGACGATC --overlap=3 -n 1 -m 24) ([Martin, 2011](#_ENREF_12)). Reads that were less than 24 (16nt plus 2x4 N randomized nt) nucleotides in length or contained ambiguous nucleotides were discarded. Reads were collapsed and then the randomized adapter nucleotides were trimmed using Flexbar ([Dodt et al., 2012](#_ENREF_6)). The remaining reads were first aligned to Drosophila melanogaster rRNA sequences (Ensemble v81). Only reads, which did not align were retained and aligned to the BDGP6 *Drosophila melanogaster* genome (Ensemble v81) using STAR (Dobin et al. 2013). (STAR parameters: --alignEndsType EndToEnd --runThreadN 4 --outFilterMultimapNmax 10 --outSAMattributes All --outFilterIntronMotifs RemoveNoncanonical --outReadsUnmapped Fastx --alignSJoverhangMin 12 --outFilterMatchNmin 15 --outFilterMismatchNmax 1 --outFilterMismatchNoverLmax 0.05 --outFilterMultimapScoreRange 3 --alignIntronMax 20000 --seedMultimapNmax 200000 --seedPerReadNmax 30000). Only the best alignment was retained. Annotation of the reads was performed with an in-house software annotator using annotation information from BDGP6 Ensemble v81 GTF file. Reads overlapping multiple annotation categories were assigned a single annotation according to an annotation rank file (available upon request).

Table: Quantification of CLIP sequencing reads.

|  | PEP_INPUT_R1 | PEP_INPUT_R2 | PEP_CLIP_R1 | PEP_CLIP_R2 |
| --- | --- | --- | --- | --- |
| Raw reads | 14413850 | 16280659 | 17529702 | 15606335 |
| Preprocessed collapsed reads | 9386919 | 10043709 | 12355039 | 7534270 |
| rRNA reads filtered | 5367707 | 6250351 | 3069187 | 2084034 |
| Reads after filtering | 4019212 | 3793358 | 9285852 | 5450236 |
| Uniquely aligned reads | 1061134 | 1105991 | 4189946 | 2053743 |

|  | CG3800_INPUT_R1 | CG3800_INPUT_R2 | CG3800_CLIP_R1 | CG3800_CLIP_R2 |
| --- | --- | --- | --- | --- |
| Raw reads | 47546931 | 64673122 | 79785582 | 46869514 |
| Preprocessed collapsed reads | 24043503 | 33961620 | 64499120 | 39446066 |
| rRNA reads filtered | 12182864 | 14112320 | 4367128 | 2414958 |
| Reads after filtering | 11860639 | 19849300 | 60131992 | 37031108 |
| Uniquely aligned reads | 5428387 | 6566371 | 36362798 | 19854407 |

*CLIP read annotation enrichment*

For general CLIP sequencing read processing and alignment see section CLIP library processing. For Pep all aligned reads have been used, while for CG3800 2*106 sequencing reads were randomly sampled from all aligned reads. Only reads aligning to the main chromosomes (2R, 2L, 3R, 3L, 4, X, Y) have been considered. Annotated sequencing reads were quantified and normalized to reads per 1*106. Differences between CLIP and matched input samples were depicted as the log2-transformed ratio of CLIP reads by input reads relative to the fraction of reads in the CLIP sample per annotation category.

To quantify normalized read coverage post transcription end site, we used the read_distribution.py script from RSeQC (Wang et al. 2012). To quantify read tags uniquely RSeQC uses annotation the hierarchy CDS exons > UTR exons > Introns > Intergenic regions. Furthermore, reads that overlap more then one feature for more then one gene (e.g. hit to regions covered by both TSS upstream 1Kb and TES downstream 1Kb) are not quantified. This ensures that tags, which were quantified 1kb downstream of the TES (annotated last exon ends in BDGP6 *Drosophila melanogaster* genome (Ensemble v81); chromosomes (2R, 2L, 3R, 3L, 4, X, Y)) do not fall into higher order annotation categories of neighboring transcripts or into TSS upstream regions of downstream transcripts.

*K-mer enrichment*

For 5-mer enrichment in aligned sequencing reads we used Jellyfish v2.2.4 (Marçais and Kingsford 2011). For each library we randomly sampled 7.5*106 reads from all aligning reads and quantified 5-mer occurrences normalized to the total number of bases to account for varying read lengths. Differences in normalized 5-mer frequencies between CLIP and input samples were depicted as the ratio of frequency in CLIP samples by input samples relative to the 5-mer frequency in the CLIP samples. For 5-mer enrichment in sub-annotation categories, we used 1*105 randomly sampled read per category and proceeded in the same way as described above.

**References**

Bjellqvist B, Hughes GJ, Pasquali C, Paquet N, Ravier F, Sanchez JC, Frutiger S, Hochstrasser D. 1993. The focusing positions of polypeptides in immobilized pH gradients can be predicted from their amino acid sequences. *Electrophoresis* **14**: 1023–1031.

Castello A, Fischer B, Eichelbaum K, Horos R, Beckmann BM, Strein C, Davey NE, Humphreys DT, Preiss T, Steinmetz LM, et al. 2012. Insights into RNA biology from an atlas of mammalian mRNA-binding proteins. *Cell* **149**: 1393–406.

Cox J, Mann M. 2008. MaxQuant enables high peptide identification rates, individualized p.p.b.-range mass accuracies and proteome-wide protein quantification. *Nat Biotechnol* **26**: 1367–1372.

Cox J, Neuhauser N, Michalski A, Scheltema R a., Olsen J V., Mann M. 2011. Andromeda: A peptide search engine integrated into the MaxQuant environment. *J Proteome Res* **10**: 1794–1805.

Dobin a, Davis C a, Schlesinger F, Drenkow J, Zaleski C, Jha S, Batut P, Chaisson M, Gingeras TR. 2013. {S}{T}{A}{R}: ultrafast universal {R}{N}{A}-seq aligner. *Bioinformatics* **29**: 15–21.

Dölken L, Ruzsics Z, Rädle B, Mages RG, Hoffmann R, Dickinson P, Forster T. 2008. High-resolution gene expression profiling for simultaneous kinetic parameter analysis of RNA synthesis and decay High-resolution gene expression profiling for simultaneous kinetic parameter analysis of RNA synthesis and decay. *RNA* **14**: 1959–1972.

Dosztányi Z, Csizmók V, Tompa P, Simon I. 2005. The pairwise energy content estimated from amino acid composition discriminates between folded and intrinsically unstructured proteins. *J Mol Biol* **347**: 827–839.

Finn RD, Bateman A, Clements J, Coggill P, Eberhardt RY, Eddy SR, Heger A, Hetherington K, Holm L, Mistry J, et al. 2014. Pfam: The protein families database. *Nucleic Acids Res* **42**: 222–230.

Gasteiger E, Hoogland C, Gattiker A, Duvaud S, Wilkins MR, Appel RD, Bairoch A. 2005. Protein Identification and Analysis Tools on the ExPASy Server. *Proteomics Protoc Handb* 571–607.

Gerstberger S, Hafner M, Tuschl T. 2014. A census of human RNA-binding proteins. *Nat Rev Genet* **15**: 829–845.

Hafner M, Landthaler M, Burger L, Khorshid M, Hausser J, Berninger P, Rothballer A, Ascano M, Jungkamp A-C, Munschauer M, et al. 2010. Transcriptome-wide identification of RNA-binding protein and microRNA target sites by PAR-CLIP. *Cell* **141**: 129–41.

Huppertz I, Attig J, D’Ambrogio A, Easton LE, Sibley CR, Sugimoto Y, Tajnik M, König J, Ule J. 2014. iCLIP: protein-RNA interactions at nucleotide resolution. *Methods* **65**: 274–87.

Jungkamp AC, Stoeckius M, Mecenas D, Grün D, Mastrobuoni G, Kempa S, Rajewsky N. 2011. In vivo and transcriptome-wide identification of RNA binding protein target sites. *Mol Cell* **44**: 828–840.

Kwon SC, Yi H, Eichelbaum K, Föhr S, Fischer B, You KT, Castello A, Krijgsveld J, Hentze MW, Kim VN. 2013. The RNA-binding protein repertoire of embryonic stem cells. *Nat Struct Mol Biol* **20**: 1122–30.

Marçais G, Kingsford C. 2011. A fast, lock-free approach for efficient parallel counting of occurrences of k-mers. *Bioinformatics* **27**: 764–770.

Rappsilber J, Ishihama Y, Mann M. 2003. Stop and go extraction tips for matrix-assisted laser desorption/ionization, nanoelectrospray, and LC/MS sample pretreatment in proteomics. *Anal Chem* **75**: 663–670.

Schmidt EE, Pelz O, Buhlmann S, Kerr G, Horn T, Boutros M. 2013. GenomeRNAi: A database for cell-based and in vivo RNAi phenotypes, 2013 update. *Nucleic Acids Res* **41**: 1021–1026.

Schwanhäusser B, Busse D, Li N, Dittmar G, Schuchhardt J, Wolf J, Chen W, Selbach M. 2011. Global quantification of mammalian gene expression control. *Nature* **473**: 337–42.

Stapleton M, Carlson J, Brokstein P, Yu C, Champe M, George R, Guarin H, Kronmiller B, Pacleb J, Park S, et al. 2002. A Drosophila full-length cDNA resource. *Genome Biol* **3**: 1–8.

Vilella AJ, Severin J, Ureta-Vidal A, Heng L, Durbin R, Birney E. 2009. EnsemblCompara GeneTrees: Complete, duplication-aware phylogenetic trees in vertebrates. *Genome Res* **19**: 327–335.

Wang L, Wang S, Li W. 2012. RSeQC: Quality control of RNA-seq experiments. *Bioinformatics* **28**: 2184–2185.

Wessel D, Flügge UI. 1984. A method for the quantitative recovery of protein in dilute solution in the presence of detergents and lipids. *Anal Biochem* **138**: 141–143.
