# Supplementary material for: The mRNA-bound proteome of the early fly embryo
Source: HighWire-hosted journal article supplement (doi:10.1101/gr.200386.115), 2016-04-28
Supplement: Supplemental_Table_S2.xlsx [file Supplemental_Table_S2.xlsx]

## Sheet: Suppl. Table 2 GOBP RBP clust 
For supplemental Figure 4B) Heat map indicating all enriched GO terms for early embryo mRBPome members in the six clusters. GO terms with a p-value <0.01 in at least one regime were selected, log- and z-transformed and hierarchically clustered
GOBP:term	term	Cluster 1 (n=151)	Cluster 2 (n=114)	Cluster 3 (n=107)	Cluster 4 (n=66)	Cluster 5 (n=11)	Cluster 6 (n=27)
GO:0000288	nuclear-transcribed mRNA catabolic process, deadenylation-dependent decay	2.04124	-0.408248	-0.408248	-0.408248	-0.408248	-0.408248
GO:0008358	maternal determination of anterior/posterior axis, embryo	2.04124	-0.408248	-0.408248	-0.408248	-0.408248	-0.408248
GO:0008595	determination of anterior/posterior axis, embryo	2.04124	-0.408248	-0.408248	-0.408248	-0.408248	-0.408248
GO:0000578	embryonic axis specification	2.04124	-0.408248	-0.408248	-0.408248	-0.408248	-0.408248
GO:0001709	cell fate determination	2.04124	-0.408248	-0.408248	-0.408248	-0.408248	-0.408248
GO:0003002	regionalization	2.04124	-0.408248	-0.408248	-0.408248	-0.408248	-0.408248
GO:0006399	tRNA metabolic process	2.04124	-0.408248	-0.408248	-0.408248	-0.408248	-0.408248
GO:0006418	tRNA aminoacylation for protein translation	2.04124	-0.408248	-0.408248	-0.408248	-0.408248	-0.408248
GO:0006457	protein folding	2.04124	-0.408248	-0.408248	-0.408248	-0.408248	-0.408248
GO:0006631	fatty acid metabolic process	2.04124	-0.408248	-0.408248	-0.408248	-0.408248	-0.408248
GO:0006635	fatty acid beta-oxidation	2.04124	-0.408248	-0.408248	-0.408248	-0.408248	-0.408248
GO:0007279	pole cell formation	2.04124	-0.408248	-0.408248	-0.408248	-0.408248	-0.408248
GO:0007293	germarium-derived egg chamber formation	2.04124	-0.408248	-0.408248	-0.408248	-0.408248	-0.408248
GO:0007294	germarium-derived oocyte fate determination	2.04124	-0.408248	-0.408248	-0.408248	-0.408248	-0.408248
GO:0007308	oocyte construction	2.04124	-0.408248	-0.408248	-0.408248	-0.408248	-0.408248
GO:0007309	oocyte axis specification	2.04124	-0.408248	-0.408248	-0.408248	-0.408248	-0.408248
GO:0007310	oocyte dorsal/ventral axis specification	2.04124	-0.408248	-0.408248	-0.408248	-0.408248	-0.408248
GO:0007314	oocyte anterior/posterior axis specification	2.04124	-0.408248	-0.408248	-0.408248	-0.408248	-0.408248
GO:0007317	regulation of pole plasm oskar mRNA localization	2.04124	-0.408248	-0.408248	-0.408248	-0.408248	-0.408248
GO:0007318	pole plasm protein localization	2.04124	-0.408248	-0.408248	-0.408248	-0.408248	-0.408248
GO:0007319	negative regulation of oskar mRNA translation	2.04124	-0.408248	-0.408248	-0.408248	-0.408248	-0.408248
GO:0007350	blastoderm segmentation	2.04124	-0.408248	-0.408248	-0.408248	-0.408248	-0.408248
GO:0007351	tripartite regional subdivision	2.04124	-0.408248	-0.408248	-0.408248	-0.408248	-0.408248
GO:0007613	memory	2.04124	-0.408248	-0.408248	-0.408248	-0.408248	-0.408248
GO:0009890	negative regulation of biosynthetic process	2.04124	-0.408248	-0.408248	-0.408248	-0.408248	-0.408248
GO:0009894	regulation of catabolic process	2.04124	-0.408248	-0.408248	-0.408248	-0.408248	-0.408248
GO:0009948	anterior/posterior axis specification	2.04124	-0.408248	-0.408248	-0.408248	-0.408248	-0.408248
GO:0009950	dorsal/ventral axis specification	2.04124	-0.408248	-0.408248	-0.408248	-0.408248	-0.408248
GO:0009952	anterior/posterior pattern formation	2.04124	-0.408248	-0.408248	-0.408248	-0.408248	-0.408248
GO:0009953	dorsal/ventral pattern formation	2.04124	-0.408248	-0.408248	-0.408248	-0.408248	-0.408248
GO:0009994	oocyte differentiation	2.04124	-0.408248	-0.408248	-0.408248	-0.408248	-0.408248
GO:0010558	negative regulation of macromolecule biosynthetic process	2.04124	-0.408248	-0.408248	-0.408248	-0.408248	-0.408248
GO:0016042	lipid catabolic process	2.04124	-0.408248	-0.408248	-0.408248	-0.408248	-0.408248
GO:0016054	organic acid catabolic process	2.04124	-0.408248	-0.408248	-0.408248	-0.408248	-0.408248
GO:0016325	oocyte microtubule cytoskeleton organization	2.04124	-0.408248	-0.408248	-0.408248	-0.408248	-0.408248
GO:0021700	developmental maturation	2.04124	-0.408248	-0.408248	-0.408248	-0.408248	-0.408248
GO:0030258	lipid modification	2.04124	-0.408248	-0.408248	-0.408248	-0.408248	-0.408248
GO:0030706	germarium-derived oocyte differentiation	2.04124	-0.408248	-0.408248	-0.408248	-0.408248	-0.408248
GO:0030716	oocyte fate determination	2.04124	-0.408248	-0.408248	-0.408248	-0.408248	-0.408248
GO:0030951	establishment or maintenance of microtubule cytoskeleton polarity	2.04124	-0.408248	-0.408248	-0.408248	-0.408248	-0.408248
GO:0030952	establishment or maintenance of cytoskeleton polarity	2.04124	-0.408248	-0.408248	-0.408248	-0.408248	-0.408248
GO:0031327	negative regulation of cellular biosynthetic process	2.04124	-0.408248	-0.408248	-0.408248	-0.408248	-0.408248
GO:0032269	negative regulation of cellular protein metabolic process	2.04124	-0.408248	-0.408248	-0.408248	-0.408248	-0.408248
GO:0035282	segmentation	2.04124	-0.408248	-0.408248	-0.408248	-0.408248	-0.408248
GO:0040023	establishment of nucleus localization	2.04124	-0.408248	-0.408248	-0.408248	-0.408248	-0.408248
GO:0043038	amino acid activation	2.04124	-0.408248	-0.408248	-0.408248	-0.408248	-0.408248
GO:0043039	tRNA aminoacylation	2.04124	-0.408248	-0.408248	-0.408248	-0.408248	-0.408248
GO:0043487	regulation of RNA stability	2.04124	-0.408248	-0.408248	-0.408248	-0.408248	-0.408248
GO:0043488	regulation of mRNA stability	2.04124	-0.408248	-0.408248	-0.408248	-0.408248	-0.408248
GO:0044242	cellular lipid catabolic process	2.04124	-0.408248	-0.408248	-0.408248	-0.408248	-0.408248
GO:0045450	bicoid mRNA localization	2.04124	-0.408248	-0.408248	-0.408248	-0.408248	-0.408248
GO:0045995	regulation of embryonic development	2.04124	-0.408248	-0.408248	-0.408248	-0.408248	-0.408248
GO:0046011	regulation of oskar mRNA translation	2.04124	-0.408248	-0.408248	-0.408248	-0.408248	-0.408248
GO:0046395	carboxylic acid catabolic process	2.04124	-0.408248	-0.408248	-0.408248	-0.408248	-0.408248
GO:0048469	cell maturation	2.04124	-0.408248	-0.408248	-0.408248	-0.408248	-0.408248
GO:0048599	oocyte development	2.04124	-0.408248	-0.408248	-0.408248	-0.408248	-0.408248
GO:0048610	reproductive cellular process	2.04124	-0.408248	-0.408248	-0.408248	-0.408248	-0.408248
GO:0051248	negative regulation of protein metabolic process	2.04124	-0.408248	-0.408248	-0.408248	-0.408248	-0.408248
GO:0051322	anaphase	2.04124	-0.408248	-0.408248	-0.408248	-0.408248	-0.408248
GO:0051647	nucleus localization	2.04124	-0.408248	-0.408248	-0.408248	-0.408248	-0.408248
GO:0060281	regulation of oocyte development	2.04124	-0.408248	-0.408248	-0.408248	-0.408248	-0.408248
GO:0060284	regulation of cell development	2.04124	-0.408248	-0.408248	-0.408248	-0.408248	-0.408248
GO:0060341	regulation of cellular localization	2.04124	-0.408248	-0.408248	-0.408248	-0.408248	-0.408248
GO:0000184	nuclear-transcribed mRNA catabolic process, nonsense-mediated decay	2.04124	-0.408248	-0.408248	-0.408248	-0.408248	-0.408248
GO:0003006	reproductive developmental process	2.04124	-0.408248	-0.408248	-0.408248	-0.408248	-0.408248
GO:0006302	double-strand break repair	2.04124	-0.408248	-0.408248	-0.408248	-0.408248	-0.408248
GO:0007097	nuclear migration	2.04124	-0.408248	-0.408248	-0.408248	-0.408248	-0.408248
GO:0007277	pole cell development	2.04124	-0.408248	-0.408248	-0.408248	-0.408248	-0.408248
GO:0007389	pattern specification process	2.04124	-0.408248	-0.408248	-0.408248	-0.408248	-0.408248
GO:0007616	long-term memory	2.04124	-0.408248	-0.408248	-0.408248	-0.408248	-0.408248
GO:0008103	oocyte microtubule cytoskeleton polarization	2.04124	-0.408248	-0.408248	-0.408248	-0.408248	-0.408248
GO:0008298	intracellular mRNA localization	2.04124	-0.408248	-0.408248	-0.408248	-0.408248	-0.408248
GO:0009062	fatty acid catabolic process	2.04124	-0.408248	-0.408248	-0.408248	-0.408248	-0.408248
GO:0009798	axis specification	2.04124	-0.408248	-0.408248	-0.408248	-0.408248	-0.408248
GO:0009880	embryonic pattern specification	2.04124	-0.408248	-0.408248	-0.408248	-0.408248	-0.408248
GO:0017148	negative regulation of translation	2.04124	-0.408248	-0.408248	-0.408248	-0.408248	-0.408248
GO:0019395	fatty acid oxidation	2.04124	-0.408248	-0.408248	-0.408248	-0.408248	-0.408248
GO:0031023	microtubule organizing center organization	2.04124	-0.408248	-0.408248	-0.408248	-0.408248	-0.408248
GO:0034440	lipid oxidation	2.04124	-0.408248	-0.408248	-0.408248	-0.408248	-0.408248
GO:0044087	regulation of cellular component biogenesis	2.04124	-0.408248	-0.408248	-0.408248	-0.408248	-0.408248
GO:0045165	cell fate commitment	2.04124	-0.408248	-0.408248	-0.408248	-0.408248	-0.408248
GO:0007292	female gamete generation	2.01426	-0.483874	-0.078766	-0.483874	-0.483874	-0.483874
GO:0000059	protein import into nucleus, docking	-0.408248	2.04124	-0.408248	-0.408248	-0.408248	-0.408248
GO:0015931	nucleobase, nucleoside, nucleotide and nucleic acid transport	-0.408248	2.04124	-0.408248	-0.408248	-0.408248	-0.408248
GO:0006511	ubiquitin-dependent protein catabolic process	-0.408248	2.04124	-0.408248	-0.408248	-0.408248	-0.408248
GO:0007059	chromosome segregation	-0.408248	2.04124	-0.408248	-0.408248	-0.408248	-0.408248
GO:0010033	response to organic substance	-0.408248	2.04124	-0.408248	-0.408248	-0.408248	-0.408248
GO:0017038	protein import	-0.408248	2.04124	-0.408248	-0.408248	-0.408248	-0.408248
GO:0019941	modification-dependent protein catabolic process	-0.408248	2.04124	-0.408248	-0.408248	-0.408248	-0.408248
GO:0030163	protein catabolic process	-0.408248	2.04124	-0.408248	-0.408248	-0.408248	-0.408248
GO:0031050	dsRNA fragmentation	-0.408248	2.04124	-0.408248	-0.408248	-0.408248	-0.408248
GO:0031053	primary microRNA processing	-0.408248	2.04124	-0.408248	-0.408248	-0.408248	-0.408248
GO:0035195	gene silencing by miRNA	-0.408248	2.04124	-0.408248	-0.408248	-0.408248	-0.408248
GO:0043331	response to dsRNA	-0.408248	2.04124	-0.408248	-0.408248	-0.408248	-0.408248
GO:0044257	cellular protein catabolic process	-0.408248	2.04124	-0.408248	-0.408248	-0.408248	-0.408248
GO:0050657	nucleic acid transport	-0.408248	2.04124	-0.408248	-0.408248	-0.408248	-0.408248
GO:0050658	RNA transport	-0.408248	2.04124	-0.408248	-0.408248	-0.408248	-0.408248
GO:0051168	nuclear export	-0.408248	2.04124	-0.408248	-0.408248	-0.408248	-0.408248
GO:0051170	nuclear import	-0.408248	2.04124	-0.408248	-0.408248	-0.408248	-0.408248
GO:0051236	establishment of RNA localization	-0.408248	2.04124	-0.408248	-0.408248	-0.408248	-0.408248
GO:0051603	proteolysis involved in cellular protein catabolic process	-0.408248	2.04124	-0.408248	-0.408248	-0.408248	-0.408248
GO:0030422	RNA interference, production of siRNA	-0.408248	2.04124	-0.408248	-0.408248	-0.408248	-0.408248
GO:0035196	gene silencing by miRNA, production of miRNAs	-0.408248	2.04124	-0.408248	-0.408248	-0.408248	-0.408248
GO:0006606	protein import into nucleus	-0.408248	2.04124	-0.408248	-0.408248	-0.408248	-0.408248
GO:0006913	nucleocytoplasmic transport	-0.408248	2.04124	-0.408248	-0.408248	-0.408248	-0.408248
GO:0010629	negative regulation of gene expression	-0.408248	2.04124	-0.408248	-0.408248	-0.408248	-0.408248
GO:0033365	protein localization in organelle	-0.408248	2.04124	-0.408248	-0.408248	-0.408248	-0.408248
GO:0034504	protein localization in nucleus	-0.408248	2.04124	-0.408248	-0.408248	-0.408248	-0.408248
GO:0043632	modification-dependent macromolecule catabolic process	-0.408248	2.04124	-0.408248	-0.408248	-0.408248	-0.408248
GO:0051169	nuclear transport	-0.408248	2.04124	-0.408248	-0.408248	-0.408248	-0.408248
GO:0048025	negative regulation of nuclear mRNA splicing, via spliceosome	-0.408248	-0.408248	2.04124	-0.408248	-0.408248	-0.408248
GO:0000245	spliceosome assembly	-0.408248	-0.408248	2.04124	-0.408248	-0.408248	-0.408248
GO:0006261	DNA-dependent DNA replication	-0.408248	-0.408248	2.04124	-0.408248	-0.408248	-0.408248
GO:0006267	pre-replicative complex assembly	-0.408248	-0.408248	2.04124	-0.408248	-0.408248	-0.408248
GO:0006270	DNA replication initiation	-0.408248	-0.408248	2.04124	-0.408248	-0.408248	-0.408248
GO:0006376	mRNA splice site selection	-0.408248	-0.408248	2.04124	-0.408248	-0.408248	-0.408248
GO:0016072	rRNA metabolic process	-0.408248	-0.408248	2.04124	-0.408248	-0.408248	-0.408248
GO:0032270	positive regulation of cellular protein metabolic process	-0.408248	-0.408248	2.04124	-0.408248	-0.408248	-0.408248
GO:0033119	negative regulation of RNA splicing	-0.408248	-0.408248	2.04124	-0.408248	-0.408248	-0.408248
GO:0045727	positive regulation of translation	-0.408248	-0.408248	2.04124	-0.408248	-0.408248	-0.408248
GO:0050686	negative regulation of mRNA processing	-0.408248	-0.408248	2.04124	-0.408248	-0.408248	-0.408248
GO:0051247	positive regulation of protein metabolic process	-0.408248	-0.408248	2.04124	-0.408248	-0.408248	-0.408248
GO:0051252	regulation of RNA metabolic process	-0.408248	-0.408248	2.04124	-0.408248	-0.408248	-0.408248
GO:0065004	protein-DNA complex assembly	-0.408248	-0.408248	2.04124	-0.408248	-0.408248	-0.408248
GO:0042254	ribosome biogenesis	-0.408248	-0.408248	2.04124	-0.408248	-0.408248	-0.408248
GO:0051231	spindle elongation	-0.55057	-0.55057	0.275771	1.92651	-0.55057	-0.55057
GO:0000022	mitotic spindle elongation	-0.55087	-0.55087	0.277569	1.92591	-0.55087	-0.55087
GO:0006412	translation	-0.445549	-0.608065	0.264022	1.92675	-0.52909	-0.608065
GO:0007052	mitotic spindle organization	0.363392	-0.600737	0.595537	1.53582	-0.947007	-0.947007
GO:0007051	spindle organization	0.319171	-0.518413	0.572958	1.55958	-0.966647	-0.966647
GO:0000278	mitotic cell cycle	0.69501	-0.594759	0.505218	1.38684	-0.996155	-0.996155
GO:0022403	cell cycle phase	0.938252	-0.552955	0.377256	1.26848	-1.01552	-1.01552
GO:0000279	M phase	0.95444	-0.541542	0.384606	1.24763	-1.02257	-1.02257
GO:0022402	cell cycle process	0.887425	-0.477627	0.342026	1.31548	-1.03365	-1.03365
GO:0007049	cell cycle	0.97199	-0.419091	0.24651	1.28397	-1.04169	-1.04169
GO:0032956	regulation of actin cytoskeleton organization	-0.408248	-0.408248	-0.408248	-0.408248	2.04124	-0.408248
GO:0032970	regulation of actin filament-based process	-0.408248	-0.408248	-0.408248	-0.408248	2.04124	-0.408248
GO:0005996	monosaccharide metabolic process	-0.408248	-0.408248	-0.408248	-0.408248	-0.408248	2.04124
GO:0006006	glucose metabolic process	-0.408248	-0.408248	-0.408248	-0.408248	-0.408248	2.04124
GO:0006007	glucose catabolic process	-0.408248	-0.408248	-0.408248	-0.408248	-0.408248	2.04124
GO:0006081	cellular aldehyde metabolic process	-0.408248	-0.408248	-0.408248	-0.408248	-0.408248	2.04124
GO:0006084	acetyl-CoA metabolic process	-0.408248	-0.408248	-0.408248	-0.408248	-0.408248	2.04124
GO:0006091	generation of precursor metabolites and energy	-0.408248	-0.408248	-0.408248	-0.408248	-0.408248	2.04124
GO:0006094	gluconeogenesis	-0.408248	-0.408248	-0.408248	-0.408248	-0.408248	2.04124
GO:0006099	tricarboxylic acid cycle	-0.408248	-0.408248	-0.408248	-0.408248	-0.408248	2.04124
GO:0006119	oxidative phosphorylation	-0.408248	-0.408248	-0.408248	-0.408248	-0.408248	2.04124
GO:0006732	coenzyme metabolic process	-0.408248	-0.408248	-0.408248	-0.408248	-0.408248	2.04124
GO:0009060	aerobic respiration	-0.408248	-0.408248	-0.408248	-0.408248	-0.408248	2.04124
GO:0009109	coenzyme catabolic process	-0.408248	-0.408248	-0.408248	-0.408248	-0.408248	2.04124
GO:0015980	energy derivation by oxidation of organic compounds	-0.408248	-0.408248	-0.408248	-0.408248	-0.408248	2.04124
GO:0016310	phosphorylation	-0.408248	-0.408248	-0.408248	-0.408248	-0.408248	2.04124
GO:0019318	hexose metabolic process	-0.408248	-0.408248	-0.408248	-0.408248	-0.408248	2.04124
GO:0019319	hexose biosynthetic process	-0.408248	-0.408248	-0.408248	-0.408248	-0.408248	2.04124
GO:0019320	hexose catabolic process	-0.408248	-0.408248	-0.408248	-0.408248	-0.408248	2.04124
GO:0044275	cellular carbohydrate catabolic process	-0.408248	-0.408248	-0.408248	-0.408248	-0.408248	2.04124
GO:0045333	cellular respiration	-0.408248	-0.408248	-0.408248	-0.408248	-0.408248	2.04124
GO:0046164	alcohol catabolic process	-0.408248	-0.408248	-0.408248	-0.408248	-0.408248	2.04124
GO:0046356	acetyl-CoA catabolic process	-0.408248	-0.408248	-0.408248	-0.408248	-0.408248	2.04124
GO:0046364	monosaccharide biosynthetic process	-0.408248	-0.408248	-0.408248	-0.408248	-0.408248	2.04124
GO:0046365	monosaccharide catabolic process	-0.408248	-0.408248	-0.408248	-0.408248	-0.408248	2.04124
GO:0051186	cofactor metabolic process	-0.408248	-0.408248	-0.408248	-0.408248	-0.408248	2.04124
GO:0051187	cofactor catabolic process	-0.408248	-0.408248	-0.408248	-0.408248	-0.408248	2.04124
GO:0055114	oxidation reduction	-0.408248	-0.408248	-0.408248	-0.408248	-0.408248	2.04124
GO:0006090	pyruvate metabolic process	-0.408248	-0.408248	-0.408248	-0.408248	-0.408248	2.04124
GO:0006096	glycolysis	-0.408248	-0.408248	-0.408248	-0.408248	-0.408248	2.04124
GO:0006793	phosphorus metabolic process	-0.408248	-0.408248	-0.408248	-0.408248	-0.408248	2.04124
GO:0006796	phosphate metabolic process	-0.408248	-0.408248	-0.408248	-0.408248	-0.408248	2.04124
GO:0016052	carbohydrate catabolic process	-0.408248	-0.408248	-0.408248	-0.408248	-0.408248	2.04124
GO:0046165	alcohol biosynthetic process	-0.408248	-0.408248	-0.408248	-0.408248	-0.408248	2.04124
