# Supplementary material for: The mRNA-bound proteome of the early fly embryo
Source: HighWire-hosted journal article supplement (doi:10.1101/gr.200386.115), 2016-04-28
Supplement: Supplemental_Table_S5.xlsx [file Supplemental_Table_S5.xlsx]

## Sheet: FMO plasmids
comment	plasmid ID	gene name	CG gene ID
positive ctrl	FMO02542	elav	CG4262
positive ctrl	FMO03322	smg	CG5263
positive ctrl	FMO08835	Pumilio	CG9755
confirmed RNA binding	FMO06054	CG6422	CG6422
not verified RNA binding	FMO10254	wech	CG42396
confirmed RNA binding	FMO03969	Rack1	CG7111
confirmed RNA binding	FMO12893	Nop56	CG13849
confirmed RNA binding	FMO02033	CG6543	CG6543
confirmed RNA binding	FMO02610	CG9135	CG9135
not verified RNA binding	FMO05933	glyP	CG7254
confirmed RNA binding	FMO04620	Eb1	CG3265
confirmed RNA binding	FMO13022	Jabba	CG42351
confirmed RNA binding	FMO10135	Flr	CG10724
confirmed RNA binding	FMO09119	PEP	CG6143
confirmed RNA binding	FMO05319	CG3800	CG3800
confirmed RNA binding	FMO02615	CG4749	CG4749
confirmed RNA binding	FMO06293	CG1091	CG1091
confirmed RNA binding	FMO12869	CG32479	CG32479
confirmed RNA binding	FMO09107	Aac11	CG6582
confirmed RNA binding	FMO05414	bic	CG3644
not verified RNA binding	FMO03333	Hsc70Cb	CG6603
not verified RNA binding	FMO03396	CG6287	CG6287
confirmed RNA binding	FMO05658	mbf1	CG4143
confirmed RNA binding	FMO06227	CG30497	CG30497
confirmed RNA binding	FMO08396	CG1109	CG1109
confirmed RNA binding	FMO01142	slmb	CG3412
confirmed RNA binding	FMO05818	dhd	CG4193
